# Supplementary material for: Targeting oxidized phosphatidylcholines in SOD1-associated ALS: therapeutic potential of PC-OxPL-VecTab®
Source: Front Neurosci. 2025 Jul 8;19:1620181. doi: 10.3389/fnins.2025.1620181 (PMC12279709; doi:10.3389/fnins.2025.1620181)
Supplement: Supplementary file 1 [file Table_1.xlsx]

## Sheet: S1 - NanoSt. Overlap Analysis
		SOD1 G93A			Wt + PONPC			SOD1 G93A & Wt + PONPC
nanoString panel		NP	NI		NP	NI		NP + NI
N (DE)		257	210		173	138		MMP2
		ABAT	ABCC8		ITPR1	EPCAM		RYR3
		ABL1	ADRA2A		CALB1	RAD51B		NCAPH
		ACTN1	AGO4		RYR3	CHST8		DOCK1
		ADCY8	AKT2		CACNA1D	KDM1B		CHST8
		ADCY9	APOE		CNTF	IRAK2		CACNA1C
		ADCYAP1	ASB2		NOL3	POLE		ARRB2
		ADRA2A	ATF3		FAM126A	EPG5		BID
		AKT1	ATG3		FAS	ST3GAL6		PRKAA2
		AKT1S1	ATG5		GRM2	ERCC2		POLR2L
		AMIGO1	ATP6V0E1		MBP	SLC44A1		COL4A2
		AP1S1	ATR		CACNB4	PTX3		GRM3
		AP2B1	B3GNT5		VEGFA	RTN4RL1		PRKN
		APAF1	BAG3		MMRN2	FKBP5		SIRT7
		APC	BAG4		MMP2	NFKBIE		TMCC3
		APOE	BCL2		HTRA2	PLXDC2		SOD2
		ARHGEF10	BCL2L1		ARSA	SETD7		U2AF2
		ARRB2	BDNF		SIRT7	SHANK3		PILRB
		ARSA	BECN1		ADCY8	CDK20		RAD51B
		ATG5	BID		CPT1B	GADD45A		MMRN2
		ATM	BMI1		SLC4A10	BIK		DAB2
		ATP6V0D1	BNIP3		NOS1	PILRB		EZH1
		ATP6V0E1	BNIP3L		CACNB2	SOX9		CASP6
		ATP6V1E1	CABLES1		HDAC1	LACC1		GRM2
		ATP6V1G2	CAMK4		GABRA4	CYP7B1		NR4A2
		ATP8A2	CASP2		PMP22	MAP3K1		CALB1
		ATXN7	CASP6		GRN	BMI1		GPR37
		BCHE	CASP9		STAMBPL1	MEF2C		C9orf72
		BCL2	CD47		IGF1R	CNTNAP2		CACNB4
		BDNF	CD83		GRIN2B	MCM2		MAPKAPK2
		BECN1	CD8A		ITPR2	ATF3		CTNS
		BID	CDKN1A		NFKBIB	RIPK2		IRAK2
		BNIP3	CHEK1		FRMPD4	ITGB5		ADCYAP1
		C9orf72	CHST8		NPC1	RIPK1		SLC8A1
		CA2	CKS1B		NF1	KMT2A		PLXDC2
		CACNA1A	CLIC4		RASGRP1	MOBP		RASGRP1
		CACNA1C	CLSTN1		GRIA3	ATM		SLC6A1
		CACNB4	CNN2		TH	MYORG		KDM5C
		CADPS	COA5		GTF2H3	BAD		ATF3
		CALB1	COTL1		GUSB	DOCK1		SUV39H1
		CALB2	COX5B		CHRNA7	ATR		OSGIN1
		CAMK2B	CREM		NR4A2	AMBRA1		AKT2
		CAMK2D	CRIP1		TRPV1	SLC6A1		NQO1
		CAMK4	CSK		CHAT	AMIGO2		NPC2
		CASP6	CYP7B1		CDK5RAP3	MAPK14		PIK3CA
		CCND1	DAB2		GPR37	SYP		APOE
		CD8A	DLG1		CACNA1B	PIK3R1		TSPO
		CDC40	DLG4		GABRR1	CCNG2		BDNF
		CDK5	DNMT3A		HAP1	KMT2C		NTHL1
		CDK5R1	DOCK1		PLA2G4C	BRD2		SORCS3
		CDK7	DOT1L		RAPGEF2	DAPK1		SERPINB6
		CDKN1A	DUSP7		DLGAP1	IKBKG		CHEK1
		CDS1	EED		CACNA1C	ASB2		BCHE
		CERS4	EHMT2		TNR	PROS1		SETDB1
		CHAT	EIF1		SGPL1	GRM3		BCL2
		CHD4	EMP1		PRKAA2	KDM3A		FGF2
		CHRNA7	EP300		ENTPD2	PLEKHM1		EPG5
		CHRNB2	EPCAM		PRKCQ	EEF2K		ADRA2A
		CLDN15	EPG5		CTNS	FYN		RAD9A
		CLN3	EZH1		SLC12A5	HELLS		POLR2J
		CLN8	FABP5		BCL2	JARID2		RIPK1
		CLU	FANCC		NPC2	TGFBR1		NRGN
		CNKSR2	FKBP5		CREBBP	SETDB1		ATR
		CNR1	FSCN1		SNCA	ITGAV		ABL1
		CNTN1	GBA		PLA2G6	ATG9A		LACC1
		COL4A1	GRIA1		BID	GBA		JAM2
		COL4A2	GRIA2		KCNB1	BRAF		TAZ
		COMT	GRIN2B		PLXNC1	CHN2		KDM6A
		CPLX1	GRM2		AKT2	MDC1		CA2
		CPT1B	GRM3		MMP24	SMC1A		COA5
		CREB1	GRN		CYCS	MBD3		TARBP2
		CREBBP	GSN		CADPS	CAMK4		NTF3
		CRTC2	H2AFX		IPCEF1	BAK1		NKX6-2
		CTNS	HAT1		POLR2J	HDAC4		CHRNB2
		CXCR4	HDAC1		TAZ	LRRC3		GUSB
		CXXC1	HDAC2		MGMT	KDM6A		TNFRSF10B
		DAGLA	HPRT1		APC	TMCC3		GABRR1
		DBH	HSPB1		UGT8	CASP9		SMC1A
		DDC	IFNAR2		TSPO	BAG3		GRN
		DDX23	IGF2R		CASP6	EZH1		CAMK4
		DGKB	IRAK2		ATP2B3	ATG14		DDC
		DGKE	IRF2		ATXN7	KDM5C		MYORG
		DLAT	ITGAV		GNB5	PTEN		RIPK2
		DLG3	JAM2		FGF2	H2AFX		GGA1
		DLG4	JUN		PSEN2	RNF8		SLC12A5
		DLGAP1	KAT2A		EFNB3	TBC1D4		PPP3CC
		DNAH1	KAT2B		GSK3B	UNG		NFE2L2
		DRD1	KDM2B		ATP8A2	VAMP7		POLE
		DRD2	KDM4C		NTS	BRD3		NOL3
		EFNA5	KDM4D		IL10RA	GCLC		TLR4
		EGFL7	KDM5C		SERPINB6	ITGA6		TSPAN18
		EGFR	KDM6A		ARHGAP44	TIMP1		CRIP1
		EGR1	KMT2C		NFE2L2	SOCS3		COL4A1
		ENTPD2	LACC1		HDAC6	CALCOCO2		TMEM64
		EPHA3	LAMP1		LCLAT1	RALA		BNIP3
		EPHA4	LAMP2		PDPK1	NCAPH		PLA2G6
		EPHA5	LGMN		C9orf72	SOD2		SOX9
		EPHA6	LIG1		DDC	DAB2		TP53
		EPHA7	LMNB1		GNPTG	RPS10		TH
		FGF12	MAFB		FMR1	PMS2		CAMK2B
		FGF2	MAFF		PLCB4	PRKCE		FRMPD4
		FN1	MAP2K4		CYP4X1	MCM6		RELB
		FRMPD4	MAP3K1		PIK3CA	CTSS		MBD3
		GAA	MAPK12		ATXN2	OGG1		CASP9
		GABRG2	MBD3		UNC13A	TSPAN18		CREBBP
		GABRR1	MCM6		SCN2A	NRGN		HTRA2
		GAD1	MDM2		SLC8A1	VIM		PRKCQ
		GGA1	MEF2C		RAB3C	WDR5		CADPS
		GPR37	MRE11		TNFRSF1A	CABLES1		DLGAP1
		GPRASP1	MSN		TAF4	MAVS		ITGAV
		GRIA1	MYORG		CDC40	FEN1		PCNA
		GRIA2	NBN		CERS2	JAM2		GRIN2B
		GRIA3	NCAPH		TBP	IL1RAP		CHAT
		GRIN1	NCOR2		CUL2	TNFRSF10B		MCM6
		GRIN2B	NFE2L2		GGA1	GRIN2A		TNFRSF1A
		GRM2	NGFR		LRP1	TMEM64		CPT1B
		GRM8	NLGN1		BNIP3	EZH2		LSM2
		GRN	NPTX1		AP2B1	MFGE8		ST3GAL6
		GSN	NQO1		PNKD	BDNF		PLA2G4C
		GSS	NRGN		KIAA1161	CHEK1		APAF1
		GTF2B	NRM		MAPKAPK2	PCNA		CYP7B1
		GTF2IRD1	NRP2		IDE	SUV39H1		IL13RA1
		GUCY1B3	NTHL1		LSM2	NQO1		ITPR1
		HAP1	OPTN		POLR2L	BCL2L11		HDAC1
		HCN1	OSGIN1		LSM7	COA5		SLC44A1
		HDAC1	PAK1		PRKN	TARBP2		BMI1
		HDAC2	PCNA		NME5	NTHL1		ENTPD2
		HDAC7	PEX14		PTDSS2	ST8SIA6		ATXN7
		HEXB	PIK3CA		TOR1A	ADRA2A		TGFBR1
		HGF	PIK3R2		SIRT1	FBLN5		BAG3
		HSPB1	PILRA		CHRNB2	RELB		CCND1
		HTRA2	PILRB		PSMB9	DOT1L		CABLES1
		IL13RA1	PLXDC2		IKBKB	SLC2A1		ATP8A2
		INPP5F	POLE		CRTC2	CRIP1		AP2B1
		ITGA7	PPFIA4		NMB	KIT		CRTC2
		ITPR1	PRDX1		IL13RA1	PTTG1		ATM
		ITPR2	PRKACA		COL4A2	OSGIN1		FKBP5
		JUN	PRKAR2A		ADCYAP1	RAD9A		ITGA7
		LAMP1	PRKAR2B		S100B	ARHGAP24		CALB2
		LMNA	PRKCQ		BCHE			GBA
		LSM2	PRKDC		APAF1			ACTN1
		LSM7	PROS1		ISLR2			PTX3
		LYPLA1	PSEN2		ITGA7			APC
		MAP2	PTGER3		AP4S1			PROS1
		MAPK3	PTMS		CAMK2B			ADCY8
		MAPK8	PTX3		MTA2			PSEN2
		MAPKAPK2	RAB6B		CCND1			ITPR2
		MARCO	RAB7A		MYD88			NTS
		MEAF6	RAC1		GAL3ST1			GRIA3
		MGMT	RAD50		PRPF3			ARSA
		MMP2	RAD51B		U2AF2			H2AFX
		MMRN2	RAD51C		CA2			TIMP1
		MSN	RAD9A		STAT1			HAP1
		MUTYH	RALB		CHMP2B			PTDSS2
		MYC	RBFOX3		ATP6V0E1			UGT8
		MYH10	RELB		ACTN1			ARHGEF10
		NAGLU	RELN		ABL1			MGMT
		NEFH	RHOA		XBP1			MAP3K1
		NEGR1	RIPK1		SORCS3			ATP6V0E1
		NELL2	RIPK2		PPP3CC			TNR
		NES	RPA1		TLR4			AMIGO1
		NFKBIA	RPL28		WFS1			KMT2C
		NGFR	RPL36AL		AMIGO1			STAT1
		NKX6-2	RPS21		ARRB2			DOT1L
		NOL3	RPS9		CALB2			CDC40
		NOTCH4	S100A10		COL4A1			SLC2A1
		NPC2	SERPINF1		TP53			EPCAM
		NR4A2	SESN1		NTF3			TOR1A
		NRXN1	SETD1B		NKX6-2			PNKD
		NTF3	SETDB1		DRD1			ASB2
		NTNG1	SIN3A		GABRB2			LSM7
		NTS	SLC17A6		ARHGEF10			PSMB9
		OPTN	SLC2A1		KEAP1			CHRNA7
		PAK1	SLC44A1		APOE			MEF2C
		PALM	SLC6A1					SLC4A10
		PARK7	SMARCA4					SYP
		PCNA	SMC1A					DRD1
		PHF21A	SOD2
		PKN1	SOX9
		PLA2G16	SPP1
		PLA2G4C	ST3GAL6
		PLA2G6	STMN1
		PLCB3	SUMO1
		PLEKHO2	SUV39H1
		PNKD	SUV39H2
		POLR2J	SYP
		POLR2K	TARBP2
		POLR2L	TET1
		PPARGC1A	TGFBR1
		PPM1L	TIMP1
		PPP3CA	TLE3
		PPP3CC	TMCC3
		PPT1	TMEM206
		PQBP1	TMEM64
		PRKAA2	TNFRSF10B
		PRKACA	TNFRSF1A
		PRKCA	TP53
		PRKCG	TP53BP2
		PRKCQ	TPD52
		PRKCSH	TRIM47
		PRKN	TRPM4
		PSEN2	TSPAN18
		PSMB9	TUBB3
		PTDSS1	TXNRD1
		PTDSS2	ULK1
		PTPRN2	VPS4A
		PTPRR	XIAP
		RAN	FAM104A
		RASGRP1	GUSB
		RET	MTO1
		RHOA	TADA2B
		RYR1
		RYR2
		RYR3
		SCN1A
		SERPINB6
		SIRT2
		SIRT7
		SLC12A5
		SLC17A6
		SLC18A2
		SLC4A10
		SLC8A1
		SLC9A6
		SMN1
		SNCB
		SORCS3
		SORL1
		SOX9
		SRC
		SRI
		STAT1
		STAT3
		STX1A
		SYT4
		SYT7
		TAF10
		TAF4B
		TARDBP
		TAZ
		TENM2
		TF
		TFAM
		TH
		TLR4
		TNFRSF10B
		TNR
		TOR1A
		TP53
		TPM1
		TSPO
		U2AF2
		UGCG
		UGT8
		USP21
		XIAP
		XK

## Sheet: S2 - GO analysis PC-OxPL-VecTab
source	term_name	term_id	adjusted_p_value	negative_log10_of_adjusted_p_value	term_size	query_size	intersection_size	effective_domain_size	intersections
GO:MF	protein binding	GO:0005515	1.04784e-12	11.9797	14865	220	207	20196	ABCC8,ADRA2A,AGO4,AKT2,APOE,ASB2,ATF3,ATG3,ATG5,ATR,B3GNT5,BAG3,BAG4,BCL2,BDNF,BECN1,BMI1,BNIP3,BNIP3L,CABLES1,CASP2,CASP6,CD47,CD83,CD8A,CDKN1A,CKS1B,CLIC4,CLSTN1,CNN2,COA5,COTL1,COX5B,CSK,DAB2,DLG4,DNMT3A,DOCK1,DOT1L,DUSP7,EHMT2,EIF1,EP300,EPCAM,EPG5,FABP5,GRIA1,GRIA2,GRIN2B,GRM2,GRM3,GRN,GSN,HDAC1,HPRT1,HSPB1,IFNAR2,IGF2R,IRAK2,JAM2,JUN,KAT2A,KAT2B,KDM4D,KDM5C,KDM6A,KMT2C,LACC1,LAMP1,LAMP2,LGM…
GO:MF	enzyme binding	GO:0019899	4.41676e-12	11.3549	2105	220	64	20196	ADRA2A,APOE,ATG3,BAG4,BCL2,BECN1,BNIP3,CASP2,CDKN1A,CKS1B,COTL1,CSK,DLG4,DOCK1,GRIA1,GSN,HDAC1,HSPB1,IFNAR2,IGF2R,JUN,KAT2A,KAT2B,LAMP1,LAMP2,MAP3K1,MDM2,MEF2C,MSN,NFE2L2,NGFR,PAK1,PCNA,PRKACA,PRKAR2A,PRKAR2B,RAB7A,RAC1,RAD9A,RALB,RELB,RHOA,RIPK1,RIPK2,SOD2,SOX9,TARBP2,TP53,ABL1,APAF1,APC,BCHE,CACNB4,CCND1,CLU,HDAC7,MAPKAPK2,PPP3CA,PRKN,PTPRR,RYR2,SLC12A5,SORL1,TAF10
GO:MF	identical protein binding	GO:0042802	6.72745e-10	9.17215	2166	220	61	20196	ADRA2A,APOE,ATF3,BCL2,BECN1,BNIP3,BNIP3L,CASP2,CASP6,CSK,DNMT3A,FABP5,GRIA1,HPRT1,HSPB1,IGF2R,IRAK2,JUN,KDM6A,MAFB,MCM6,MDM2,MRE11,NLGN1,NQO1,NRP2,OPTN,PAK1,PCNA,PEX14,PRDX1,RAD50,RELB,RIPK1,RIPK2,S100A10,SLC6A1,SOD2,SYP,TARBP2,TMCC3,TP53,TPD52,TRPM4,ACTN1,APAF1,BCHE,CHRNA7,CNR1,DRD2,FGF2,GABRR1,GAD1,HCN1,HGF,PRKN,RASGRP1,RYR2,SMN1,TAF10,TENM2
GO:MF	kinase binding	GO:0019900	1.36235e-08	7.86571	790	220	33	20196	ADRA2A,BECN1,CDKN1A,CKS1B,CSK,DLG4,GRIA1,GSN,HSPB1,IFNAR2,KAT2B,MAP3K1,MSN,PCNA,PRKACA,PRKAR2A,PRKAR2B,RAC1,RAD9A,RELB,RHOA,SOX9,TP53,ABL1,APC,CACNB4,CCND1,HDAC7,MAPKAPK2,PRKN,PTPRR,RYR2,SLC12A5
GO:MF	protein kinase binding	GO:0019901	1.66293e-08	7.77913	706	220	31	20196	ADRA2A,BECN1,CDKN1A,CKS1B,CSK,GRIA1,HSPB1,IFNAR2,KAT2B,MAP3K1,MSN,PCNA,PRKACA,PRKAR2A,PRKAR2B,RAC1,RAD9A,RELB,RHOA,SOX9,TP53,ABL1,APC,CACNB4,CCND1,HDAC7,MAPKAPK2,PRKN,PTPRR,RYR2,SLC12A5
GO:MF	histone modifying activity	GO:0140993	2.0478e-08	7.68871	195	220	17	20196	ATR,DOT1L,EHMT2,EP300,HDAC1,KAT2A,KAT2B,KDM4D,KDM5C,KDM6A,KMT2C,SETD1B,SETDB1,SUV39H1,SUV39H2,PRKAA2,TAF10
GO:MF	protein-containing complex binding	GO:0044877	4.44544e-08	7.35209	1279	220	42	20196	ADRA2A,APOE,ATR,BAG3,BAG4,CD8A,CDKN1A,CNN2,COTL1,DLG4,EIF1,EP300,EPCAM,GRIA1,GSN,HDAC1,IGF2R,JAM2,MAFB,MDM2,PAK1,PCNA,RAB7A,RAC1,RIPK1,SIN3A,SMC1A,SPP1,TP53,VPS4A,ABL1,ACTN1,APC,CLU,DRD2,FGF2,GABRR1,ITGA7,MUTYH,PPP3CA,PRKN,SORL1
GO:MF	amyloid-beta binding	GO:0001540	7.75916e-07	6.11019	84	220	11	20196	APOE,CLSTN1,GRIA1,GRIA2,GRIN2B,NGFR,NLGN1,BCHE,CHRNA7,CLU,SORL1
GO:MF	protein domain specific binding	GO:0019904	1.32314e-06	5.87839	655	220	27	20196	BCL2,BMI1,CASP2,DLG4,DOCK1,EHMT2,GRIA1,HDAC1,LAMP1,LAMP2,MDM2,NFE2L2,NLGN1,PRKACA,PRKAR2A,PRKAR2B,RAD9A,RIPK1,RIPK2,SYP,TP53,ABL1,APAF1,GABRR1,ITPR1,POLR2J,PRKN
GO:MF	ion binding	GO:0043167	4.57768e-06	5.33935	6153	220	107	20196	ABCC8,ADRA2A,AKT2,APOE,ATR,BMI1,CDKN1A,CLSTN1,COX5B,CRIP1,CSK,CYP7B1,DNMT3A,EHMT2,EP300,FABP5,GRIN2B,GSN,HDAC1,HPRT1,IGF2R,IRAK2,KDM4D,KDM5C,KDM6A,KMT2C,LACC1,LIG1,MAP3K1,MCM6,MDM2,MRE11,NPTX1,NRP2,NTHL1,OPTN,PAK1,PIK3CA,POLE,PRKACA,PRKAR2A,PRKAR2B,PRKCQ,PROS1,RAB6B,RAB7A,RAC1,RAD50,RAD51B,RAD51C,RALB,RELN,RHOA,RIPK1,RIPK2,RPA1,S100A10,SESN1,SETDB1,SLC6A1,SMC1A,SOD2,SPP1,SUV39H1,SUV39H2,TET1,TP53…
GO:MF	small molecule binding	GO:0036094	6.60921e-06	5.17985	6357	220	109	20196	ABCC8,ADRA2A,AKT2,APOE,ATR,BMI1,CDKN1A,CLSTN1,COX5B,CRIP1,CSK,CYP7B1,DNMT3A,EHMT2,EP300,FABP5,GRIN2B,GSN,HDAC1,HPRT1,IGF2R,IRAK2,KDM4D,KDM5C,KDM6A,KMT2C,LACC1,LIG1,MAP3K1,MCM6,MDM2,MRE11,NPTX1,NRP2,NTHL1,OPTN,PAK1,PIK3CA,POLE,PRKACA,PRKAR2A,PRKAR2B,PRKCQ,PROS1,RAB6B,RAB7A,RAC1,RAD50,RAD51B,RAD51C,RALB,RELN,RHOA,RIPK1,RIPK2,RPA1,S100A10,SESN1,SETDB1,SLC6A1,SMC1A,SOD2,SPP1,SUV39H1,SUV39H2,SYP,TET1,…
GO:MF	ubiquitin protein ligase binding	GO:0031625	2.15104e-05	4.66735	308	220	17	20196	BAG4,BCL2,BECN1,CDKN1A,JUN,MDM2,NFE2L2,NGFR,PRKACA,PRKAR2A,PRKAR2B,RALB,RIPK1,TP53,APC,CLU,PRKN
GO:MF	catalytic activity, acting on a protein	GO:0140096	3.01793e-05	4.52029	2358	220	54	20196	AKT2,ASB2,ATG3,ATG5,ATR,CASP2,CASP6,CDKN1A,CSK,DNMT3A,DOT1L,DUSP7,EHMT2,EP300,HDAC1,IGF2R,IRAK2,KAT2A,KAT2B,KDM4D,KDM5C,KDM6A,KMT2C,LGMN,MAP3K1,MDM2,NRP2,PAK1,PIK3CA,PRKACA,PRKCQ,RELN,RIPK1,RIPK2,SETD1B,SETDB1,SUV39H1,SUV39H2,TRIM47,ABL1,CAMK4,CCND1,EPHA6,HDAC7,HGF,MAPKAPK2,MMP2,PPP3CA,PRKAA2,PRKCG,PRKN,PTPRR,TAF10,USP21
GO:MF	molecular function regulator activity	GO:0098772	4.28673e-05	4.36787	2120	220	50	20196	AKT2,APOE,BAG3,BAG4,BCL2,BDNF,BMI1,CDKN1A,CKS1B,DOCK1,GRM2,GRM3,GRN,HSPB1,JUN,KAT2B,LAMP1,LAMP2,LGMN,OSGIN1,PCNA,PIK3CA,PRKAR2A,PRKAR2B,PROS1,RAB7A,RAC1,RAD51B,RAD51C,RALB,RHOA,SIN3A,SPP1,TP53,ADCYAP1,AKT1S1,AMIGO1,APAF1,APC,ARHGEF10,CCND1,CHRNA7,DRD2,FGF12,FGF2,HGF,ITPR1,NTF3,RASGRP1,SORL1
GO:MF	ubiquitin-like protein ligase binding	GO:0044389	4.87598e-05	4.31194	326	220	17	20196	BAG4,BCL2,BECN1,CDKN1A,JUN,MDM2,NFE2L2,NGFR,PRKACA,PRKAR2A,PRKAR2B,RALB,RIPK1,TP53,APC,CLU,PRKN
GO:MF	protein kinase A catalytic subunit binding	GO:0034236	0.000113816	3.9438	14	220	5	20196	CSK,PRKAR2A,PRKAR2B,SOX9,RYR2
GO:MF	histone H3 methyltransferase activity	GO:0140938	0.000135645	3.86759	42	220	7	20196	DOT1L,EHMT2,KMT2C,SETD1B,SETDB1,SUV39H1,SUV39H2
GO:MF	catalytic activity	GO:0003824	0.000212155	3.67335	5751	220	97	20196	ABCC8,AGO4,AKT2,ASB2,ATG3,ATG5,ATR,B3GNT5,CASP2,CASP6,CDKN1A,CKS1B,COX5B,CSK,CYP7B1,DNMT3A,DOT1L,DUSP7,EHMT2,EP300,HDAC1,HPRT1,IGF2R,IRAK2,KAT2A,KAT2B,KDM4D,KDM5C,KDM6A,KMT2C,LACC1,LGMN,LIG1,MAP3K1,MCM6,MDM2,MRE11,MYORG,NQO1,NRP2,NTHL1,PAK1,PCNA,PIK3CA,POLE,PRDX1,PRKACA,PRKAR2A,PRKCQ,RAB6B,RAB7A,RAC1,RAD50,RAD51B,RAD51C,RAD9A,RALB,RELN,RHOA,RIPK1,RIPK2,SESN1,SETD1B,SETDB1,SMC1A,SOD2,ST3GAL6,SUV39…
GO:MF	transferase activity	GO:0016740	0.000384259	3.41538	2346	220	51	20196	AKT2,ASB2,ATG3,ATG5,ATR,B3GNT5,CDKN1A,CKS1B,CSK,DNMT3A,DOT1L,EHMT2,EP300,HPRT1,IGF2R,IRAK2,KAT2A,KAT2B,KDM5C,KMT2C,LACC1,MAP3K1,MDM2,NRP2,PAK1,PIK3CA,POLE,PRKACA,PRKAR2A,PRKCQ,RIPK1,RIPK2,SETD1B,SETDB1,ST3GAL6,SUV39H1,SUV39H2,TRIM47,ABL1,CAMK4,CCND1,CPT1B,EPHA6,HDAC7,MAPKAPK2,POLR2J,PRKAA2,PRKCG,PRKN,TAF10,TAZ
GO:MF	ligand-gated monoatomic ion channel activity	GO:0015276	0.000410467	3.38672	186	220	12	20196	ABCC8,GRIA1,GRIA2,GRIN2B,TRPM4,CHRNA7,GABRG2,GABRR1,HCN1,ITPR1,RYR1,RYR2
GO:MF	ligand-gated channel activity	GO:0022834	0.000459676	3.33755	188	220	12	20196	ABCC8,GRIA1,GRIA2,GRIN2B,TRPM4,CHRNA7,GABRG2,GABRR1,HCN1,ITPR1,RYR1,RYR2
GO:MF	protein kinase A binding	GO:0051018	0.000700169	3.1548	53	220	7	20196	CSK,GRIA1,PRKACA,PRKAR2A,PRKAR2B,SOX9,RYR2
GO:MF	protein kinase activity	GO:0004672	0.000800136	3.09684	586	220	21	20196	AKT2,ATR,CDKN1A,CSK,IGF2R,IRAK2,MAP3K1,NRP2,PAK1,PIK3CA,PRKACA,PRKCQ,RIPK1,RIPK2,ABL1,CAMK4,CCND1,EPHA6,MAPKAPK2,PRKAA2,PRKCG
GO:MF	DNA-binding transcription factor binding	GO:0140297	0.00080711	3.09307	490	220	19	20196	BCL2,DNMT3A,DOT1L,EP300,HDAC1,HSPB1,JUN,KAT2A,KAT2B,MEF2C,NFE2L2,PCNA,SIN3A,SOX9,TP53,CRTC2,HDAC7,NR4A2,TAF10
GO:MF	chromatin binding	GO:0003682	0.00125244	2.90224	603	220	21	20196	BMI1,DNMT3A,EHMT2,EP300,HDAC1,KAT2A,KAT2B,KDM4D,KDM6A,NCAPH,PCNA,POLE,SETDB1,SIN3A,SMC1A,SOX9,SUV39H1,TP53,HDAC7,PRKAA2,TAF10
GO:MF	amide binding	GO:0033218	0.00147967	2.82984	248	220	13	20196	APOE,CLSTN1,GRIA1,GRIA2,GRIN2B,NGFR,NLGN1,BCHE,CHRNA7,CLU,PPP3CA,RYR2,SORL1
GO:MF	protein serine/threonine kinase inhibitor activity	GO:0030291	0.00158458	2.80009	39	220	6	20196	CDKN1A,HSPB1,KAT2B,PRKAR2A,PRKAR2B,AKT1S1
GO:MF	cation binding	GO:0043169	0.00176161	2.75409	4474	220	78	20196	ADRA2A,AKT2,APOE,BMI1,CDKN1A,CLSTN1,COX5B,CRIP1,CSK,CYP7B1,DNMT3A,EHMT2,EP300,GRIN2B,GSN,HDAC1,HPRT1,KDM4D,KDM5C,KDM6A,KMT2C,LACC1,LIG1,MAP3K1,MDM2,MRE11,NPTX1,NRP2,NTHL1,OPTN,POLE,PRKACA,PRKCQ,PROS1,RAD50,RELN,RPA1,S100A10,SESN1,SETDB1,SLC6A1,SOD2,SUV39H1,SUV39H2,TET1,TP53,TPD52,TRIM47,TRPM4,ABL1,ACTN1,ADCY9,BCHE,CACNA1C,CALB2,CHRNA7,CXXC1,DBH,DRD2,EGFL7,HDAC7,ITGA7,ITPR1,MMP2,MUTYH,NR4A2,PNKD,P…
GO:MF	protein-lysine N-methyltransferase activity	GO:0016279	0.00184073	2.73501	61	220	7	20196	DOT1L,EHMT2,KMT2C,SETD1B,SETDB1,SUV39H1,SUV39H2
GO:MF	lysine N-methyltransferase activity	GO:0016278	0.00205596	2.68698	62	220	7	20196	DOT1L,EHMT2,KMT2C,SETD1B,SETDB1,SUV39H1,SUV39H2
GO:MF	channel regulator activity	GO:0016247	0.00235417	2.62816	149	220	10	20196	BCL2,GRM2,GRM3,LAMP1,LAMP2,AMIGO1,CHRNA7,DRD2,FGF12,ITPR1
GO:MF	signaling receptor binding	GO:0005102	0.00248374	2.60489	1499	220	36	20196	ADRA2A,APOE,BDNF,CD8A,DAB2,DLG4,GRIA1,GRN,JAM2,MDM2,MSN,NLGN1,OSGIN1,PCNA,PEX14,PILRB,RELN,RIPK1,RIPK2,SPP1,TP53,ABL1,ACTN1,ADCYAP1,CLU,DRD2,EGFL7,FGF12,FGF2,HAP1,HGF,ITGA7,NES,NTF3,PRKN,TF
GO:MF	transporter regulator activity	GO:0141108	0.00249862	2.6023	150	220	10	20196	BCL2,GRM2,GRM3,LAMP1,LAMP2,AMIGO1,CHRNA7,DRD2,FGF12,ITPR1
GO:MF	histone methyltransferase activity	GO:0042054	0.00313791	2.50336	66	220	7	20196	DOT1L,EHMT2,KMT2C,SETD1B,SETDB1,SUV39H1,SUV39H2
GO:MF	death domain binding	GO:0070513	0.00381092	2.41897	13	220	4	20196	BCL2,CASP2,RIPK1,APAF1
GO:MF	histone H3K9 methyltransferase activity	GO:0046974	0.00381092	2.41897	13	220	4	20196	EHMT2,SETDB1,SUV39H1,SUV39H2
GO:MF	glutamate receptor activity	GO:0008066	0.004089	2.38838	27	220	5	20196	GRIA1,GRIA2,GRIN2B,GRM2,GRM3
GO:MF	ligand-gated calcium channel activity	GO:0099604	0.004089	2.38838	27	220	5	20196	GRIN2B,TRPM4,ITPR1,RYR1,RYR2
GO:MF	transcription factor binding	GO:0008134	0.00414789	2.38217	600	220	20	20196	BCL2,DNMT3A,DOT1L,EHMT2,EP300,HDAC1,HSPB1,JUN,KAT2A,KAT2B,MEF2C,NFE2L2,PCNA,SIN3A,SOX9,TP53,CRTC2,HDAC7,NR4A2,TAF10
GO:MF	protein methyltransferase activity	GO:0008276	0.00427307	2.36926	96	220	8	20196	DNMT3A,DOT1L,EHMT2,KMT2C,SETD1B,SETDB1,SUV39H1,SUV39H2
GO:MF	protein-macromolecule adaptor activity	GO:0030674	0.00443351	2.35325	988	220	27	20196	BECN1,DAB2,DNMT3A,DOT1L,EP300,HDAC1,IFNAR2,IRAK2,KAT2A,KAT2B,KMT2C,LAMP2,OPTN,PEX14,RAD50,RIPK1,RIPK2,RPA1,SIN3A,SUV39H2,ABL1,ACTN1,CCND1,FGF2,HDAC7,PRKN,USP21
GO:MF	histone H3K9 trimethyltransferase activity	GO:0140949	0.00527215	2.27801	5	220	3	20196	SETDB1,SUV39H1,SUV39H2
GO:MF	channel activity	GO:0015267	0.00548826	2.26057	510	220	18	20196	ABCC8,BCL2,CLIC4,GRIA1,GRIA2,GRIN2B,SLC17A6,TRPM4,CACNA1C,CACNB4,CHRNA7,GABRG2,GABRR1,HCN1,ITPR1,RYR1,RYR2,SLC12A5
GO:MF	passive transmembrane transporter activity	GO:0022803	0.00563437	2.24915	511	220	18	20196	ABCC8,BCL2,CLIC4,GRIA1,GRIA2,GRIN2B,SLC17A6,TRPM4,CACNA1C,CACNB4,CHRNA7,GABRG2,GABRR1,HCN1,ITPR1,RYR1,RYR2,SLC12A5
GO:MF	neurotransmitter receptor activity	GO:0030594	0.0057775	2.23826	100	220	8	20196	GRIA1,GRIA2,GRIN2B,CHRNA7,DRD2,GABRG2,GABRR1,TSPO
GO:MF	kinase activity	GO:0016301	0.00640232	2.19366	780	220	23	20196	AKT2,ATR,CDKN1A,CKS1B,CSK,IGF2R,IRAK2,MAP3K1,NRP2,PAK1,PIK3CA,PRKACA,PRKAR2A,PRKCQ,RIPK1,RIPK2,ABL1,CAMK4,CCND1,EPHA6,MAPKAPK2,PRKAA2,PRKCG
GO:MF	gated channel activity	GO:0022836	0.00726152	2.13897	331	220	14	20196	ABCC8,GRIA1,GRIA2,GRIN2B,TRPM4,CACNA1C,CACNB4,CHRNA7,GABRG2,GABRR1,HCN1,ITPR1,RYR1,RYR2
GO:MF	transition metal ion binding	GO:0046914	0.00771269	2.11279	1139	220	29	20196	BMI1,CRIP1,CYP7B1,EHMT2,EP300,GRIN2B,KDM5C,LACC1,MAP3K1,MDM2,MRE11,POLE,PRKACA,SETDB1,SOD2,SUV39H1,SUV39H2,TET1,TP53,TRIM47,ABL1,CXXC1,DBH,MMP2,NR4A2,PRKCG,PRKN,RASGRP1,TF
GO:MF	catalytic activity, acting on DNA	GO:0140097	0.00852665	2.06922	250	220	12	20196	DNMT3A,LIG1,MCM6,MRE11,NTHL1,PCNA,POLE,RAD50,RAD51B,RAD51C,RAD9A,MUTYH
GO:MF	peptide binding	GO:0042277	0.00997353	2.00115	254	220	12	20196	APOE,CLSTN1,CRIP1,GRIA1,GRIA2,GRIN2B,NGFR,NLGN1,BCHE,CHRNA7,CLU,SORL1
GO:MF	phosphotransferase activity, alcohol group as acceptor	GO:0016773	0.0109509	1.96055	696	220	21	20196	AKT2,ATR,CDKN1A,CSK,IGF2R,IRAK2,MAP3K1,NRP2,PAK1,PIK3CA,PRKACA,PRKCQ,RIPK1,RIPK2,ABL1,CAMK4,CCND1,EPHA6,MAPKAPK2,PRKAA2,PRKCG
GO:MF	ion channel regulator activity	GO:0099106	0.0122848	1.91063	144	220	9	20196	GRM2,GRM3,LAMP1,LAMP2,AMIGO1,CHRNA7,DRD2,FGF12,ITPR1
GO:MF	molecular adaptor activity	GO:0060090	0.0136386	1.86523	1175	220	29	20196	BCL2,BECN1,DAB2,DNMT3A,DOT1L,EP300,HDAC1,IFNAR2,IRAK2,KAT2A,KAT2B,KMT2C,LAMP2,OPTN,PEX14,RAD50,RIPK1,RIPK2,RPA1,SIN3A,SUV39H2,ABL1,ACTN1,CCND1,COL4A2,FGF2,HDAC7,PRKN,USP21
GO:MF	monoatomic ion channel activity	GO:0005216	0.014575	1.83639	448	220	16	20196	ABCC8,CLIC4,GRIA1,GRIA2,GRIN2B,SLC17A6,TRPM4,CACNA1C,CACNB4,CHRNA7,GABRG2,GABRR1,HCN1,ITPR1,RYR1,RYR2
GO:MF	binding	GO:0005488	0.0170461	1.76838	18366	220	215	20196	ABCC8,ADRA2A,AGO4,AKT2,APOE,ASB2,ATF3,ATG3,ATG5,ATR,B3GNT5,BAG3,BAG4,BCL2,BDNF,BECN1,BMI1,BNIP3,BNIP3L,CABLES1,CASP2,CASP6,CD47,CD83,CD8A,CDKN1A,CKS1B,CLIC4,CLSTN1,CNN2,COA5,COTL1,COX5B,CRIP1,CSK,CYP7B1,DAB2,DLG4,DNMT3A,DOCK1,DOT1L,DUSP7,EHMT2,EIF1,EP300,EPCAM,EPG5,FABP5,GRIA1,GRIA2,GRIN2B,GRM2,GRM3,GRN,GSN,HDAC1,HPRT1,HSPB1,IFNAR2,IGF2R,IRAK2,JAM2,JUN,KAT2A,KAT2B,KDM4D,KDM5C,KDM6A,KMT2C,LACC1,LA…
GO:MF	transferase activity, transferring phosphorus-containing groups	GO:0016772	0.019184	1.71706	954	220	25	20196	AKT2,ATR,CDKN1A,CKS1B,CSK,IGF2R,IRAK2,MAP3K1,NRP2,PAK1,PIK3CA,POLE,PRKACA,PRKAR2A,PRKCQ,RIPK1,RIPK2,ABL1,CAMK4,CCND1,EPHA6,MAPKAPK2,POLR2J,PRKAA2,PRKCG
GO:MF	metal ion binding	GO:0046872	0.0203214	1.69205	4375	220	73	20196	AKT2,APOE,BMI1,CDKN1A,CLSTN1,COX5B,CRIP1,CSK,CYP7B1,DNMT3A,EHMT2,EP300,GRIN2B,GSN,HDAC1,HPRT1,KDM4D,KDM5C,KDM6A,KMT2C,LACC1,LIG1,MAP3K1,MDM2,MRE11,NPTX1,NRP2,NTHL1,OPTN,POLE,PRKACA,PRKCQ,PROS1,RAD50,RELN,RPA1,S100A10,SETDB1,SLC6A1,SOD2,SUV39H1,SUV39H2,TET1,TP53,TPD52,TRIM47,TRPM4,ABL1,ACTN1,ADCY9,CACNA1C,CALB2,CXXC1,DBH,EGFL7,HDAC7,ITGA7,ITPR1,MMP2,MUTYH,NR4A2,PNKD,PPP3CA,PRKAA2,PRKCG,PRKN,RASGRP…
GO:MF	anion binding	GO:0043168	0.0284575	1.5458	2445	220	47	20196	ABCC8,AKT2,ATR,CSK,FABP5,GRIN2B,GSN,IGF2R,IRAK2,LIG1,MAP3K1,MCM6,PAK1,PIK3CA,PRKACA,PRKAR2A,PRKAR2B,PRKCQ,RAB6B,RAB7A,RAC1,RAD50,RAD51B,RAD51C,RALB,RHOA,RIPK1,RIPK2,SESN1,SMC1A,TRPM4,VPS4A,MTO1,ABL1,ADCY9,APAF1,CAMK4,DBH,EPHA6,GAD1,HCN1,ITPR1,MAPKAPK2,PRKAA2,PRKCG,RYR1,RYR2
GO:MF	promoter-specific chromatin binding	GO:1990841	0.0316958	1.499	65	220	6	20196	BMI1,EHMT2,HDAC1,SETDB1,TP53,TAF10
GO:MF	histone deacetylase binding	GO:0042826	0.0323779	1.48975	127	220	8	20196	HDAC1,KAT2A,KAT2B,MEF2C,RAD9A,TP53,CCND1,PRKN
GO:MF	calcium channel activity	GO:0005262	0.0342174	1.46575	128	220	8	20196	GRIN2B,TRPM4,CACNA1C,CACNB4,CHRNA7,ITPR1,RYR1,RYR2
GO:MF	calcium-dependent protein serine/threonine kinase activity	GO:0009931	0.0428779	1.36777	9	220	3	20196	CAMK4,MAPKAPK2,PRKCG
GO:MF	N-methyltransferase activity	GO:0008170	0.0442851	1.35374	99	220	7	20196	DOT1L,EHMT2,KMT2C,SETD1B,SETDB1,SUV39H1,SUV39H2
GO:MF	histone H3K9 acetyltransferase activity	GO:0043992	0.0496342	1.30422	2	220	2	20196	KAT2A,KAT2B
GO:MF	Atg8-family ligase activity	GO:0019776	0.0496342	1.30422	2	220	2	20196	ATG3,ATG5
GO:MF	group II metabotropic glutamate receptor activity	GO:0001641	0.0496342	1.30422	2	220	2	20196	GRM2,GRM3
GO:BP	cellular response to stimulus	GO:0051716	9.48738e-34	33.0229	7320	219	168	21017	ABCC8,ADRA2A,AKT2,APOE,ASB2,ATF3,ATG5,ATR,BAG3,BAG4,BCL2,BDNF,BECN1,BMI1,BNIP3,BNIP3L,CASP2,CASP6,CD47,CD83,CD8A,CDKN1A,CLIC4,CNN2,CRIP1,CSK,CYP7B1,DAB2,DLG4,DNMT3A,DOCK1,DOT1L,DUSP7,EHMT2,EP300,EPCAM,EPG5,FABP5,GRIA1,GRIA2,GRIN2B,GRM2,GRM3,GRN,HDAC1,HSPB1,IFNAR2,IGF2R,IRAK2,JUN,KAT2A,KAT2B,KDM4D,KDM6A,LACC1,LAMP1,LAMP2,LGMN,LIG1,MAFB,MAP3K1,MCM6,MDM2,MEF2C,MRE11,MSN,MYORG,NFE2L2,NGFR,NLGN1,NPTX1…
GO:BP	positive regulation of biological process	GO:0048518	4.23814e-30	29.3728	6235	219	151	21017	ABCC8,ADRA2A,AKT2,APOE,ATF3,ATG5,ATR,BAG3,BAG4,BCL2,BDNF,BECN1,BMI1,BNIP3,BNIP3L,CASP2,CASP6,CD47,CD83,CD8A,CDKN1A,CLSTN1,CNN2,CSK,CYP7B1,DAB2,DLG4,DNMT3A,DOCK1,DOT1L,EIF1,EP300,EPCAM,EPG5,FABP5,GRIA1,GRIN2B,GRM2,GRN,GSN,HDAC1,HPRT1,HSPB1,IGF2R,IRAK2,JAM2,JUN,KAT2A,KAT2B,KDM4D,KDM6A,KMT2C,LACC1,LAMP1,LAMP2,LGMN,MAFB,MAFF,MDM2,MEF2C,MRE11,MSN,MYORG,NCAPH,NFE2L2,NGFR,NLGN1,NQO1,NRP2,OPTN,PAK1,PCNA,…
GO:BP	response to stimulus	GO:0050896	4.42466e-30	29.3541	8993	219	180	21017	ABCC8,ADRA2A,AKT2,APOE,ASB2,ATF3,ATG5,ATR,BAG3,BAG4,BCL2,BDNF,BECN1,BMI1,BNIP3,BNIP3L,CASP2,CASP6,CD47,CD83,CD8A,CDKN1A,CLIC4,CNN2,COTL1,CRIP1,CSK,CYP7B1,DAB2,DLG4,DNMT3A,DOCK1,DOT1L,DUSP7,EHMT2,EP300,EPCAM,EPG5,FABP5,GRIA1,GRIA2,GRIN2B,GRM2,GRM3,GRN,GSN,HDAC1,HPRT1,HSPB1,IFNAR2,IGF2R,IRAK2,JUN,KAT2A,KAT2B,KDM4D,KDM6A,KMT2C,LACC1,LAMP1,LAMP2,LGMN,LIG1,MAFB,MAP3K1,MCM6,MDM2,MEF2C,MRE11,MSN,MYORG,N…
GO:BP	cell communication	GO:0007154	2.51059e-29	28.6002	6496	219	153	21017	ABCC8,ADRA2A,AKT2,APOE,ASB2,ATF3,ATR,BAG3,BAG4,BCL2,BDNF,BECN1,BMI1,BNIP3,BNIP3L,CASP2,CASP6,CD47,CD83,CD8A,CDKN1A,CLSTN1,CRIP1,CSK,CYP7B1,DAB2,DLG4,DOCK1,DOT1L,DUSP7,EP300,EPCAM,EPG5,FABP5,GRIA1,GRIA2,GRIN2B,GRM2,GRM3,GRN,HDAC1,HSPB1,IFNAR2,IGF2R,IRAK2,JUN,KAT2A,KDM6A,LACC1,LAMP1,LAMP2,LGMN,MAFB,MAP3K1,MDM2,MEF2C,MRE11,MYORG,NFE2L2,NGFR,NLGN1,NPTX1,NQO1,NRP2,OPTN,OSGIN1,PAK1,PIK3CA,PILRB,PRDX1,P…
GO:BP	signaling	GO:0023052	8.13358e-29	28.0897	6471	219	152	21017	ABCC8,ADRA2A,AKT2,APOE,ASB2,ATF3,ATR,BAG3,BAG4,BCL2,BDNF,BECN1,BMI1,BNIP3,BNIP3L,CASP2,CASP6,CD47,CD83,CD8A,CDKN1A,CLSTN1,CRIP1,CSK,CYP7B1,DAB2,DLG4,DOCK1,DOT1L,DUSP7,EP300,EPCAM,EPG5,FABP5,GRIA1,GRIA2,GRIN2B,GRM2,GRM3,GRN,HDAC1,HSPB1,IFNAR2,IGF2R,IRAK2,JUN,KAT2A,KDM6A,LACC1,LAMP1,LAMP2,LGMN,MAFB,MAP3K1,MDM2,MEF2C,MRE11,MYORG,NFE2L2,NGFR,NLGN1,NPTX1,NQO1,NRP2,OPTN,OSGIN1,PAK1,PIK3CA,PILRB,PRDX1,P…
GO:BP	multicellular organism development	GO:0007275	2.26391e-27	26.6451	4658	219	127	21017	ABCC8,AGO4,AKT2,APOE,ASB2,ATG5,B3GNT5,BCL2,BDNF,BECN1,BMI1,BNIP3,CABLES1,CASP2,CD47,CD83,CDKN1A,CLIC4,CLSTN1,CRIP1,CSK,CYP7B1,DAB2,DLG4,DNMT3A,EHMT2,EP300,EPCAM,GRIA1,GRIN2B,GRN,GSN,HDAC1,HPRT1,HSPB1,IGF2R,JAM2,KAT2A,KAT2B,KDM6A,MAFB,MAFF,MDM2,MEF2C,NFE2L2,NGFR,NLGN1,NPTX1,NRP2,PAK1,PCNA,PIK3CA,POLE,PRDX1,PRKACA,PRKCQ,RAB6B,RAC1,RAD51B,RELN,RHOA,RIPK1,RIPK2,S100A10,SIN3A,SLC17A6,SOD2,SOX9,SPP1,ST…
GO:BP	positive regulation of cellular process	GO:0048522	1.02697e-26	25.9884	5886	219	142	21017	ABCC8,ADRA2A,AKT2,APOE,ATF3,ATR,BAG3,BAG4,BCL2,BDNF,BECN1,BMI1,BNIP3,BNIP3L,CASP2,CASP6,CD47,CD83,CDKN1A,CLSTN1,CNN2,CSK,CYP7B1,DAB2,DLG4,DNMT3A,DOCK1,DOT1L,EIF1,EP300,EPCAM,FABP5,GRIA1,GRIN2B,GRM2,GRN,GSN,HDAC1,HPRT1,HSPB1,IGF2R,JAM2,JUN,KAT2A,KAT2B,KDM4D,KDM6A,KMT2C,LACC1,LAMP1,LGMN,MAFB,MAFF,MDM2,MEF2C,MRE11,MSN,MYORG,NCAPH,NFE2L2,NGFR,NLGN1,NQO1,NRP2,OPTN,PAK1,PCNA,PIK3CA,PILRB,PRKACA,PRKCQ,P…
GO:BP	cellular response to stress	GO:0033554	4.35244e-26	25.3613	1786	219	78	21017	ATF3,ATG5,ATR,BAG3,BCL2,BECN1,BNIP3,BNIP3L,CASP2,CDKN1A,CRIP1,DNMT3A,DOT1L,EHMT2,EP300,GRN,HSPB1,JUN,KAT2A,KAT2B,KDM4D,KDM6A,LAMP2,LIG1,MAFB,MCM6,MDM2,MEF2C,MRE11,NFE2L2,NQO1,NTHL1,OPTN,PAK1,PCNA,PEX14,PIK3CA,POLE,PRDX1,PRKACA,RAD50,RAD51B,RAD51C,RAD9A,RALB,RELB,RIPK1,RIPK2,RPA1,SESN1,SIN3A,SMC1A,SOD2,SPP1,SUV39H1,SUV39H2,TET1,TNFRSF10B,TNFRSF1A,TP53,ABL1,APAF1,APC,CCND1,CLU,DRD2,HGF,ITPR1,MAPKAP…
GO:BP	developmental process	GO:0032502	5.71342e-26	25.2431	6478	219	148	21017	ABCC8,AGO4,AKT2,APOE,ASB2,ATF3,ATG5,B3GNT5,BCL2,BDNF,BECN1,BMI1,BNIP3,CABLES1,CASP2,CASP6,CD47,CD83,CD8A,CDKN1A,CLIC4,CLSTN1,CNN2,CRIP1,CSK,CYP7B1,DAB2,DLG4,DNMT3A,DOCK1,EHMT2,EP300,EPCAM,FABP5,GRIA1,GRIN2B,GRN,GSN,HDAC1,HPRT1,HSPB1,IGF2R,JAM2,KAT2A,KAT2B,KDM6A,LGMN,LIG1,MAFB,MAFF,MDM2,MEF2C,MSN,MYORG,NFE2L2,NGFR,NLGN1,NPTX1,NRP2,OSGIN1,PAK1,PCNA,PIK3CA,POLE,PRDX1,PRKACA,PRKCQ,RAB6B,RAC1,RAD51B,R…
GO:BP	intracellular signal transduction	GO:0035556	7.27476e-26	25.1382	2946	219	99	21017	ADRA2A,AKT2,APOE,ASB2,ATF3,ATR,BAG4,BCL2,BECN1,BNIP3,CASP2,CASP6,CDKN1A,CRIP1,CSK,CYP7B1,DAB2,DOCK1,DOT1L,DUSP7,EP300,EPG5,FABP5,GRIN2B,GRM2,HDAC1,HSPB1,IRAK2,JUN,KDM6A,LACC1,LAMP2,MAFB,MAP3K1,MDM2,MEF2C,MRE11,MYORG,NFE2L2,NGFR,NLGN1,OPTN,PAK1,PIK3CA,PRDX1,PRKACA,PRKAR2A,PRKAR2B,PRKCQ,RAC1,RAD50,RAD9A,RALB,RELB,RELN,RHOA,RIPK1,RIPK2,SESN1,SOD2,SOX9,STMN1,TARBP2,TNFRSF10B,TNFRSF1A,TP53,TRPM4,VPS4A…
GO:BP	anatomical structure development	GO:0048856	1.01587e-25	24.9932	5924	219	141	21017	ABCC8,AGO4,AKT2,APOE,ASB2,ATF3,ATG5,B3GNT5,BCL2,BDNF,BECN1,BMI1,BNIP3,CABLES1,CASP2,CASP6,CD47,CD83,CD8A,CDKN1A,CLIC4,CLSTN1,CNN2,CRIP1,CSK,CYP7B1,DAB2,DLG4,DNMT3A,DOCK1,EHMT2,EP300,EPCAM,FABP5,GRIA1,GRIN2B,GRN,GSN,HDAC1,HPRT1,HSPB1,IGF2R,JAM2,KAT2A,KAT2B,KDM6A,LIG1,MAFB,MAFF,MDM2,MEF2C,MSN,MYORG,NFE2L2,NGFR,NLGN1,NPTX1,NRP2,PAK1,PCNA,PIK3CA,POLE,PRDX1,PRKACA,PRKCQ,RAB6B,RAC1,RAD51B,RELB,RELN,RHO…
GO:BP	regulation of cell communication	GO:0010646	4.85899e-25	24.3135	3453	219	106	21017	ABCC8,ADRA2A,APOE,ATF3,ATR,BAG4,BCL2,BDNF,BECN1,BMI1,CASP2,CD47,CLSTN1,CSK,CYP7B1,DAB2,DLG4,DOT1L,DUSP7,EP300,FABP5,GRIA1,GRIA2,GRIN2B,GRM2,GRM3,HDAC1,HSPB1,IFNAR2,IRAK2,KAT2A,KDM6A,LAMP2,LGMN,MDM2,MEF2C,MYORG,NFE2L2,NGFR,NLGN1,OPTN,PAK1,PIK3CA,PRDX1,PRKACA,PRKAR2B,PRKCQ,RAB7A,RAC1,RAD9A,RALB,RELN,RHOA,RIPK1,RIPK2,SESN1,SIN3A,SLC6A1,SOD2,SOX9,SPP1,STMN1,SYP,TARBP2,TET1,TMEM64,TNFRSF10B,TNFRSF1A,T…
GO:BP	response to stress	GO:0006950	9.55319e-25	24.0199	3876	219	112	21017	ADRA2A,APOE,ATF3,ATG5,ATR,BAG3,BCL2,BECN1,BNIP3,BNIP3L,CASP2,CASP6,CD47,CD83,CDKN1A,CNN2,COTL1,CRIP1,DNMT3A,DOT1L,EHMT2,EP300,EPG5,GRN,GSN,HSPB1,IFNAR2,IRAK2,JUN,KAT2A,KAT2B,KDM4D,KDM6A,LACC1,LAMP1,LAMP2,LIG1,MAFB,MCM6,MDM2,MEF2C,MRE11,NFE2L2,NQO1,NTHL1,OPTN,PAK1,PCNA,PEX14,PIK3CA,POLE,PRDX1,PRKACA,PRKCQ,PROS1,RAC1,RAD50,RAD51B,RAD51C,RAD9A,RALB,RELB,RELN,RHOA,RIPK1,RIPK2,RPA1,S100A10,SESN1,SIN3A…
GO:BP	cell death	GO:0008219	1.40592e-24	23.852	1984	219	80	21017	AGO4,AKT2,APOE,ATF3,ATG3,ATG5,BAG3,BAG4,BCL2,BDNF,BECN1,BMI1,BNIP3,BNIP3L,CASP2,CASP6,CD47,CDKN1A,CRIP1,DAB2,DNMT3A,DOCK1,EP300,GRN,GSN,HDAC1,HSPB1,IGF2R,JUN,KDM6A,LAMP1,LGMN,MDM2,MEF2C,MRE11,NFE2L2,NGFR,NPTX1,NQO1,OPTN,OSGIN1,PAK1,PIK3CA,PRKCQ,PTMS,RAD9A,RALB,RHOA,RIPK1,RIPK2,SIN3A,SOD2,SOX9,TNFRSF10B,TNFRSF1A,TP53,ABL1,ACTN1,AKT1S1,APAF1,APC,CCND1,CLU,CNR1,DBH,FGF2,HGF,ITPR1,MMP2,MUTYH,NES,NR4A…
GO:BP	programmed cell death	GO:0012501	7.00092e-24	23.1548	1980	219	79	21017	AGO4,AKT2,APOE,ATF3,ATG3,ATG5,BAG3,BAG4,BCL2,BDNF,BECN1,BMI1,BNIP3,BNIP3L,CASP2,CASP6,CD47,CDKN1A,CRIP1,DAB2,DNMT3A,DOCK1,EP300,GRN,GSN,HDAC1,HSPB1,IGF2R,JUN,KDM6A,LAMP1,LGMN,MDM2,MEF2C,MRE11,NFE2L2,NGFR,NPTX1,NQO1,OSGIN1,PAK1,PIK3CA,PRKCQ,PTMS,RAD9A,RALB,RHOA,RIPK1,RIPK2,SIN3A,SOD2,SOX9,TNFRSF10B,TNFRSF1A,TP53,ABL1,ACTN1,AKT1S1,APAF1,APC,CCND1,CLU,CNR1,DBH,FGF2,HGF,ITPR1,MMP2,MUTYH,NES,NR4A2,NTF…
GO:BP	regulation of signaling	GO:0023051	9.55267e-24	23.0199	3446	219	104	21017	ABCC8,ADRA2A,APOE,ATF3,ATR,BAG4,BCL2,BDNF,BECN1,BMI1,CASP2,CD47,CLSTN1,CSK,CYP7B1,DAB2,DLG4,DOT1L,DUSP7,EP300,FABP5,GRIA1,GRIA2,GRIN2B,GRM2,GRM3,HDAC1,HSPB1,IFNAR2,IRAK2,KAT2A,KDM6A,LAMP2,LGMN,MDM2,MEF2C,MYORG,NFE2L2,NGFR,NLGN1,OPTN,PAK1,PIK3CA,PRDX1,PRKACA,PRKAR2B,PRKCQ,RAB7A,RAC1,RAD9A,RALB,RELN,RHOA,RIPK1,RIPK2,SESN1,SIN3A,SLC6A1,SOD2,SOX9,SPP1,STMN1,SYP,TARBP2,TET1,TMEM64,TNFRSF10B,TNFRSF1A,T…
GO:BP	system development	GO:0048731	5.1717e-23	22.2864	3985	219	111	21017	ABCC8,AGO4,AKT2,APOE,ASB2,ATG5,B3GNT5,BCL2,BDNF,BECN1,BMI1,BNIP3,CABLES1,CASP2,CD47,CDKN1A,CLIC4,CLSTN1,CRIP1,CSK,CYP7B1,DAB2,DLG4,DNMT3A,EHMT2,EP300,EPCAM,GRIA1,GRIN2B,GRN,GSN,HDAC1,HPRT1,HSPB1,IGF2R,JAM2,KAT2A,KAT2B,KDM6A,MAFB,MDM2,MEF2C,NFE2L2,NGFR,NLGN1,NPTX1,NRP2,PAK1,PCNA,PIK3CA,PRDX1,PRKACA,PRKCQ,RAB6B,RAC1,RELN,RHOA,S100A10,SIN3A,SLC17A6,SOD2,SOX9,SPP1,STMN1,TNFRSF1A,TP53,TSPAN18,ABL1,ADC…
GO:BP	multicellular organismal process	GO:0032501	6.28204e-23	22.2019	7234	219	152	21017	ABCC8,ADRA2A,AGO4,AKT2,APOE,ASB2,ATG5,B3GNT5,BCL2,BDNF,BECN1,BMI1,BNIP3,CABLES1,CASP2,CD47,CD83,CD8A,CDKN1A,CLIC4,CLSTN1,COX5B,CRIP1,CSK,CYP7B1,DAB2,DLG4,DNMT3A,DOCK1,EHMT2,EP300,EPCAM,FABP5,GRIA1,GRIN2B,GRM2,GRN,GSN,HDAC1,HPRT1,HSPB1,IGF2R,JAM2,KAT2A,KAT2B,KDM6A,LACC1,LAMP1,LGMN,MAFB,MAFF,MDM2,MEF2C,MSN,NFE2L2,NGFR,NLGN1,NPTX1,NRP2,PAK1,PCNA,PIK3CA,POLE,PRDX1,PRKACA,PRKAR2B,PRKCQ,PROS1,RAB6B,RAB…
GO:BP	regulation of biological process	GO:0050789	8.8279e-23	22.0541	12278	219	198	21017	ABCC8,ADRA2A,AGO4,AKT2,APOE,ASB2,ATF3,ATG3,ATG5,ATR,BAG3,BAG4,BCL2,BDNF,BECN1,BMI1,BNIP3,BNIP3L,CABLES1,CASP2,CASP6,CD47,CD83,CD8A,CDKN1A,CKS1B,CLIC4,CLSTN1,CNN2,COTL1,CRIP1,CSK,CYP7B1,DAB2,DLG4,DNMT3A,DOCK1,DOT1L,DUSP7,EHMT2,EIF1,EP300,EPCAM,EPG5,FABP5,GRIA1,GRIA2,GRIN2B,GRM2,GRM3,GRN,GSN,HDAC1,HPRT1,HSPB1,IFNAR2,IGF2R,IRAK2,JAM2,JUN,KAT2A,KAT2B,KDM4D,KDM5C,KDM6A,KMT2C,LACC1,LAMP1,LAMP2,LGMN,MAF…
GO:BP	signal transduction	GO:0007165	1.13714e-22	21.9442	5979	219	137	21017	ADRA2A,AKT2,APOE,ASB2,ATF3,ATR,BAG3,BAG4,BCL2,BDNF,BECN1,BMI1,BNIP3,BNIP3L,CASP2,CASP6,CD47,CD83,CD8A,CDKN1A,CRIP1,CSK,CYP7B1,DAB2,DLG4,DOCK1,DOT1L,DUSP7,EP300,EPCAM,EPG5,FABP5,GRIA1,GRIA2,GRIN2B,GRM2,GRM3,GRN,HDAC1,HSPB1,IFNAR2,IGF2R,IRAK2,JUN,KDM6A,LACC1,LAMP1,LAMP2,LGMN,MAFB,MAP3K1,MDM2,MEF2C,MRE11,MYORG,NFE2L2,NGFR,NLGN1,NRP2,OPTN,OSGIN1,PAK1,PIK3CA,PILRB,PRDX1,PRKACA,PRKAR2A,PRKAR2B,PRKCQ,RA…
GO:BP	apoptotic process	GO:0006915	1.59899e-22	21.7962	1919	219	76	21017	AGO4,AKT2,APOE,ATF3,ATG3,ATG5,BAG3,BAG4,BCL2,BDNF,BECN1,BMI1,BNIP3,BNIP3L,CASP2,CASP6,CD47,CDKN1A,CRIP1,DAB2,DNMT3A,DOCK1,EP300,GRN,GSN,HDAC1,HSPB1,IGF2R,JUN,KDM6A,LGMN,MDM2,MEF2C,MRE11,NFE2L2,NGFR,NPTX1,NQO1,OSGIN1,PAK1,PIK3CA,PRKCQ,PTMS,RAD9A,RALB,RHOA,RIPK1,RIPK2,SIN3A,SOD2,SOX9,TNFRSF10B,TNFRSF1A,TP53,ABL1,ACTN1,AKT1S1,APAF1,APC,CCND1,CLU,CNR1,DBH,HGF,ITPR1,MMP2,NES,NR4A2,NTF3,PLEKHO2,PRKAA2,…
GO:BP	cellular response to chemical stimulus	GO:0070887	1.70132e-22	21.7692	2186	219	81	21017	ABCC8,ADRA2A,AKT2,APOE,ATG5,BCL2,BECN1,BNIP3,BNIP3L,CASP6,CLIC4,CRIP1,CSK,CYP7B1,DAB2,DLG4,DNMT3A,EHMT2,EP300,EPG5,GRIA1,HDAC1,HSPB1,IRAK2,JUN,KAT2B,KDM6A,LGMN,MDM2,MEF2C,MSN,NFE2L2,NGFR,NLGN1,NPTX1,NQO1,PAK1,PCNA,PEX14,PIK3CA,PRDX1,PRKACA,PRKCQ,RAC1,RALB,RELB,RHOA,RIPK1,RIPK2,SESN1,SIN3A,SOD2,SOX9,SPP1,SUV39H1,SUV39H2,TET1,TP53,TRPM4,ABL1,AMIGO1,APC,BCHE,CHRNA7,DRD2,FGF2,GABRG2,HCN1,HGF,ITPR1,MM…
GO:BP	response to chemical	GO:0042221	3.47188e-22	21.4594	3867	219	108	21017	ABCC8,ADRA2A,AKT2,APOE,ATG5,ATR,BAG4,BCL2,BECN1,BNIP3,BNIP3L,CASP6,CD47,CD83,CDKN1A,CLIC4,CRIP1,CSK,CYP7B1,DAB2,DLG4,DNMT3A,EHMT2,EP300,EPG5,GRIA1,GRIN2B,GRM2,GSN,HDAC1,HPRT1,HSPB1,IFNAR2,IGF2R,IRAK2,JUN,KAT2A,KAT2B,KDM6A,LGMN,MDM2,MEF2C,MSN,NFE2L2,NGFR,NLGN1,NPTX1,NQO1,NRP2,PAK1,PCNA,PEX14,PIK3CA,PRDX1,PRKACA,PRKAR2B,PRKCQ,RAC1,RALB,RELB,RHOA,RIPK1,RIPK2,SESN1,SETDB1,SIN3A,SLC6A1,SOD2,SOX9,SPP1,…
GO:BP	cell development	GO:0048468	6.15544e-21	20.2107	2833	219	90	21017	ABCC8,AKT2,APOE,ASB2,ATG5,BCL2,BDNF,BECN1,BMI1,CASP2,CD83,CD8A,CDKN1A,CLIC4,CNN2,DAB2,DLG4,DNMT3A,DOCK1,EHMT2,EP300,GRN,HDAC1,HPRT1,JAM2,KAT2A,KAT2B,MAFB,MDM2,MEF2C,MSN,MYORG,NFE2L2,NGFR,NLGN1,NPTX1,NRP2,PAK1,PIK3CA,PRKACA,PRKCQ,RAB6B,RAC1,RELB,RELN,RHOA,RIPK1,RIPK2,S100A10,SIN3A,SOD2,SOX9,SPP1,STMN1,TMEM64,TNFRSF1A,TP53,TPD52,ABL1,ACTN1,ADCYAP1,AMIGO1,ARHGEF10,CACNB4,CAMK4,CHRNA7,CLU,CNR1,CNTN1,…
GO:BP	regulation of response to stimulus	GO:0048583	1.05513e-20	19.9767	3958	219	107	21017	ADRA2A,APOE,ATF3,ATG5,ATR,BAG4,BCL2,BDNF,BECN1,BMI1,CASP2,CASP6,CD47,CD8A,CSK,CYP7B1,DAB2,DLG4,DNMT3A,DOT1L,DUSP7,EP300,EPG5,FABP5,GRIN2B,GRM2,GRN,HDAC1,HSPB1,IFNAR2,IRAK2,KAT2A,KAT2B,KDM4D,KDM6A,LACC1,LAMP1,LAMP2,LGMN,MAP3K1,MDM2,MEF2C,MYORG,NFE2L2,NGFR,NLGN1,OPTN,PAK1,PCNA,PIK3CA,PRDX1,PRKACA,PRKCQ,PROS1,RAB7A,RAC1,RAD9A,RALB,RELN,RHOA,RIPK1,RIPK2,SESN1,SIN3A,SOD2,SOX9,SPP1,STMN1,SYP,TARBP2,TET…
GO:BP	cell differentiation	GO:0030154	1.07282e-20	19.9695	4381	219	113	21017	ABCC8,AKT2,APOE,ASB2,ATF3,ATG5,BCL2,BDNF,BECN1,BMI1,BNIP3,CASP2,CASP6,CD83,CD8A,CDKN1A,CLIC4,CNN2,CSK,DAB2,DLG4,DNMT3A,DOCK1,EHMT2,EP300,EPCAM,GRN,HDAC1,HPRT1,JAM2,KAT2A,KAT2B,KDM6A,MAFB,MAFF,MDM2,MEF2C,MSN,MYORG,NFE2L2,NGFR,NLGN1,NPTX1,NRP2,OSGIN1,PAK1,PCNA,PIK3CA,PRKACA,PRKCQ,RAB6B,RAC1,RELB,RELN,RHOA,RIPK1,RIPK2,S100A10,SIN3A,SOD2,SOX9,SPP1,STMN1,SUV39H1,SUV39H2,TET1,TMEM64,TNFRSF1A,TP53,TPD52…
GO:BP	cellular developmental process	GO:0048869	1.0943e-20	19.9609	4382	219	113	21017	ABCC8,AKT2,APOE,ASB2,ATF3,ATG5,BCL2,BDNF,BECN1,BMI1,BNIP3,CASP2,CASP6,CD83,CD8A,CDKN1A,CLIC4,CNN2,CSK,DAB2,DLG4,DNMT3A,DOCK1,EHMT2,EP300,EPCAM,GRN,HDAC1,HPRT1,JAM2,KAT2A,KAT2B,KDM6A,MAFB,MAFF,MDM2,MEF2C,MSN,MYORG,NFE2L2,NGFR,NLGN1,NPTX1,NRP2,OSGIN1,PAK1,PCNA,PIK3CA,PRKACA,PRKCQ,RAB6B,RAC1,RELB,RELN,RHOA,RIPK1,RIPK2,S100A10,SIN3A,SOD2,SOX9,SPP1,STMN1,SUV39H1,SUV39H2,TET1,TMEM64,TNFRSF1A,TP53,TPD52…
GO:BP	biological regulation	GO:0065007	1.83055e-20	19.7374	12671	219	198	21017	ABCC8,ADRA2A,AGO4,AKT2,APOE,ASB2,ATF3,ATG3,ATG5,ATR,BAG3,BAG4,BCL2,BDNF,BECN1,BMI1,BNIP3,BNIP3L,CABLES1,CASP2,CASP6,CD47,CD83,CD8A,CDKN1A,CKS1B,CLIC4,CLSTN1,CNN2,COTL1,CRIP1,CSK,CYP7B1,DAB2,DLG4,DNMT3A,DOCK1,DOT1L,DUSP7,EHMT2,EIF1,EP300,EPCAM,EPG5,FABP5,GRIA1,GRIA2,GRIN2B,GRM2,GRM3,GRN,GSN,HDAC1,HPRT1,HSPB1,IFNAR2,IGF2R,IRAK2,JAM2,JUN,KAT2A,KAT2B,KDM4D,KDM5C,KDM6A,KMT2C,LACC1,LAMP1,LAMP2,LGMN,MAF…
GO:BP	negative regulation of cellular process	GO:0048523	2.81224e-20	19.5509	5646	219	129	21017	ABCC8,ADRA2A,AGO4,AKT2,APOE,ATF3,ATG3,ATG5,ATR,BAG3,BAG4,BCL2,BDNF,BECN1,BMI1,BNIP3,BNIP3L,CASP2,CD47,CD83,CDKN1A,CLIC4,CNN2,CSK,CYP7B1,DAB2,DLG4,DNMT3A,DOT1L,DUSP7,EHMT2,EP300,EPCAM,FABP5,GRIA1,GRIN2B,GRM2,GRN,GSN,HDAC1,HSPB1,JAM2,JUN,KAT2A,KAT2B,KDM5C,KDM6A,LAMP2,LGMN,MAFB,MAFF,MDM2,MEF2C,MRE11,NFE2L2,NGFR,NLGN1,NQO1,OPTN,OSGIN1,PAK1,PCNA,PEX14,PIK3CA,PRKACA,PRKAR2A,PRKAR2B,PRKCQ,PTMS,RAB7A,RAC…
GO:BP	response to oxygen-containing compound	GO:1901700	4.66749e-20	19.3309	1632	219	67	21017	ABCC8,ADRA2A,AKT2,APOE,BCL2,BECN1,BNIP3,CDKN1A,CSK,DNMT3A,EHMT2,EP300,GRIA1,GRIN2B,GRM2,IGF2R,IRAK2,JUN,KAT2B,KDM6A,LGMN,MDM2,MEF2C,MSN,NFE2L2,NGFR,NPTX1,NQO1,PCNA,PEX14,PIK3CA,PRDX1,PRKACA,PRKCQ,RHOA,RIPK1,RIPK2,SESN1,SETDB1,SIN3A,SLC6A1,SOD2,SOX9,SPP1,TET1,TP53,TRPM4,ABL1,AMIGO1,APC,BCHE,CHRNA7,CNR1,DBH,DRD2,HCN1,HGF,ITPR1,MAPKAPK2,MMP2,NAGLU,NR4A2,PPP3CA,PRKAA2,PRKN,SORL1,TSPO
GO:BP	regulation of programmed cell death	GO:0043067	7.05489e-20	19.1515	1497	219	64	21017	AGO4,APOE,ATF3,ATG5,BAG3,BAG4,BCL2,BDNF,BECN1,BMI1,BNIP3,BNIP3L,CASP2,CASP6,CDKN1A,DAB2,GRN,GSN,HDAC1,HSPB1,IGF2R,JUN,KDM6A,LGMN,MDM2,MEF2C,MRE11,NFE2L2,NGFR,NQO1,OSGIN1,PIK3CA,PRKCQ,PTMS,RAD9A,RHOA,RIPK1,RIPK2,SIN3A,SOD2,SOX9,TNFRSF10B,TNFRSF1A,TP53,ABL1,ACTN1,AKT1S1,APAF1,APC,CCND1,CLU,CNR1,DBH,FGF2,HGF,MMP2,MUTYH,NES,NR4A2,NTF3,PRKAA2,PRKCG,PRKN,TSPO
GO:BP	negative regulation of biological process	GO:0048519	7.55909e-20	19.1215	5865	219	131	21017	ABCC8,ADRA2A,AGO4,AKT2,APOE,ATF3,ATG3,ATG5,ATR,BAG3,BAG4,BCL2,BDNF,BECN1,BMI1,BNIP3,BNIP3L,CASP2,CD47,CD83,CDKN1A,CLIC4,CNN2,CSK,CYP7B1,DAB2,DLG4,DNMT3A,DOT1L,DUSP7,EHMT2,EP300,EPCAM,FABP5,GRIA1,GRIN2B,GRM2,GRN,GSN,HDAC1,HSPB1,JAM2,JUN,KAT2A,KAT2B,KDM5C,KDM6A,LAMP2,LGMN,MAFB,MAFF,MDM2,MEF2C,MRE11,NFE2L2,NGFR,NLGN1,NQO1,OPTN,OSGIN1,PAK1,PCNA,PEX14,PIK3CA,PRKACA,PRKAR2A,PRKAR2B,PRKCQ,PROS1,PTMS,RAB…
GO:BP	positive regulation of metabolic process	GO:0009893	8.36862e-20	19.0773	3648	219	101	21017	ABCC8,ADRA2A,AKT2,APOE,ATF3,ATR,BAG3,BAG4,BCL2,BDNF,BECN1,BMI1,BNIP3,BNIP3L,CD83,CDKN1A,CNN2,DAB2,DLG4,DOT1L,EIF1,EP300,EPCAM,FABP5,GRIA1,GRIN2B,GRN,GSN,HDAC1,HPRT1,HSPB1,JUN,KAT2A,KAT2B,KDM4D,KDM6A,KMT2C,LACC1,LGMN,MAFB,MAFF,MDM2,MEF2C,MRE11,MSN,NFE2L2,NGFR,OPTN,PAK1,PCNA,PILRB,PRKACA,PRKCQ,PTMS,RAB7A,RAC1,RAD50,RALB,RELB,RELN,RHOA,RIPK1,RIPK2,S100A10,SESN1,SOD2,SOX9,SPP1,TET1,TNFRSF10B,TNFRSF1A…
GO:BP	regulation of cellular process	GO:0050794	9.8157e-20	19.0081	11876	219	191	21017	ABCC8,ADRA2A,AGO4,AKT2,APOE,ASB2,ATF3,ATG3,ATG5,ATR,BAG3,BAG4,BCL2,BDNF,BECN1,BMI1,BNIP3,BNIP3L,CABLES1,CASP2,CASP6,CD47,CD83,CD8A,CDKN1A,CKS1B,CLIC4,CLSTN1,CNN2,COTL1,CRIP1,CSK,CYP7B1,DAB2,DLG4,DNMT3A,DOCK1,DOT1L,DUSP7,EHMT2,EIF1,EP300,EPCAM,EPG5,FABP5,GRIA1,GRIA2,GRIN2B,GRM2,GRM3,GRN,GSN,HDAC1,HPRT1,HSPB1,IFNAR2,IGF2R,IRAK2,JAM2,JUN,KAT2A,KAT2B,KDM4D,KDM5C,KDM6A,KMT2C,LACC1,LAMP1,LAMP2,LGMN,MAF…
GO:BP	nervous system development	GO:0007399	1.53154e-19	18.8149	2541	219	83	21017	ABCC8,AKT2,APOE,B3GNT5,BCL2,BDNF,BECN1,BMI1,BNIP3,CABLES1,CLSTN1,CSK,DAB2,DLG4,DNMT3A,EHMT2,EP300,GRIA1,GRIN2B,GRN,GSN,HDAC1,HPRT1,JAM2,KAT2A,KAT2B,KDM6A,MAFB,MDM2,MEF2C,NFE2L2,NGFR,NLGN1,NPTX1,NRP2,PAK1,PRKACA,PRKCQ,RAB6B,RAC1,RELN,RHOA,S100A10,SIN3A,SOD2,SOX9,SPP1,STMN1,TP53,ABL1,ADCYAP1,AMIGO1,APAF1,APC,ARHGEF10,BCHE,CCND1,CHRNA7,CLU,CNR1,CNTN1,DRD2,EPHA6,FGF12,FGF2,GABRG2,HAP1,HCN1,MMP2,NAGLU…
GO:BP	response to abiotic stimulus	GO:0009628	4.32274e-19	18.3642	1130	219	55	21017	ABCC8,AKT2,ATR,BAG3,BCL2,BECN1,BNIP3,BNIP3L,CASP2,CDKN1A,CNN2,CRIP1,DNMT3A,EP300,GRIA1,GSN,HSPB1,KDM4D,KDM6A,KMT2C,LGMN,MAP3K1,MDM2,NFE2L2,NGFR,NQO1,PCNA,PIK3CA,PRKACA,RAD9A,RELB,SMC1A,SOD2,SOX9,SUV39H1,SUV39H2,TNFRSF10B,TNFRSF1A,TP53,APAF1,CACNB4,CCND1,CHRNA7,CPT1B,DBH,DRD2,FGF2,ITPR1,MAPKAPK2,MMP2,NR4A2,RYR1,RYR2,SLC12A5,TSPO
GO:BP	regulation of apoptotic process	GO:0042981	5.46809e-19	18.2622	1458	219	62	21017	AGO4,APOE,ATF3,ATG5,BAG3,BAG4,BCL2,BDNF,BECN1,BMI1,BNIP3,BNIP3L,CASP2,CASP6,CDKN1A,DAB2,GRN,GSN,HDAC1,HSPB1,IGF2R,JUN,KDM6A,LGMN,MDM2,MEF2C,MRE11,NFE2L2,NGFR,NQO1,OSGIN1,PIK3CA,PRKCQ,PTMS,RAD9A,RHOA,RIPK1,RIPK2,SIN3A,SOD2,SOX9,TNFRSF10B,TNFRSF1A,TP53,ABL1,ACTN1,AKT1S1,APAF1,APC,CCND1,CLU,CNR1,DBH,HGF,MMP2,NES,NR4A2,NTF3,PRKAA2,PRKCG,PRKN,TSPO
GO:BP	response to nitrogen compound	GO:1901698	6.26726e-19	18.2029	1010	219	52	21017	ABCC8,AKT2,APOE,CASP6,CSK,DNMT3A,EHMT2,EP300,EPG5,GRIA1,GRM2,HPRT1,KAT2B,KDM6A,LGMN,MDM2,MEF2C,NFE2L2,NGFR,NQO1,PCNA,PIK3CA,PRKACA,PRKCQ,RALB,RIPK2,SESN1,SIN3A,SLC6A1,SOX9,TP53,TRPM4,ABL1,AMIGO1,APC,BCHE,CHRNA7,CNR1,DBH,DRD2,GABRG2,HCN1,ITPR1,MMP2,NR4A2,PPP3CA,PRKCG,PRKN,RYR1,RYR2,SORL1,TSPO
GO:BP	regulation of molecular function	GO:0065009	3.49207e-18	17.4569	1611	219	64	21017	ADRA2A,APOE,BCL2,BDNF,BMI1,CDKN1A,DAB2,DLG4,DOT1L,DUSP7,EP300,GRIN2B,GRM2,GRM3,GRN,HDAC1,HSPB1,IRAK2,JUN,KAT2B,KDM4D,LGMN,MEF2C,MRE11,NLGN1,PAK1,PCNA,PEX14,PILRB,PRKACA,PRKAR2A,PRKAR2B,PRKCQ,RAD50,RALB,RELN,RHOA,RIPK1,RIPK2,S100A10,STMN1,TARBP2,TNFRSF10B,TP53,ABL1,ADCYAP1,AKT1S1,APC,ARHGEF10,CACNA1C,CACNB4,CCND1,CHRNA7,CLU,CRTC2,DRD2,FGF12,FGF2,HAP1,NES,NTF3,PRKN,RASGRP1,RYR2
GO:BP	behavior	GO:0007610	6.45932e-18	17.1898	665	219	42	21017	ABCC8,APOE,BCL2,BDNF,DLG4,EHMT2,EP300,GRIA1,GRIN2B,GRM2,HPRT1,KAT2A,KAT2B,LGMN,MEF2C,NLGN1,PRKAR2B,RELN,SLC6A1,SOD2,TP53,ABL1,BCHE,CACNB4,CAMK4,CHRNA7,CNR1,CNTN1,DBH,DRD2,FGF12,GABRG2,GAD1,HCN1,NAGLU,NEGR1,NR4A2,NTF3,PRKCG,PRKN,SLC12A5,TSPO
GO:BP	cellular response to oxygen-containing compound	GO:1901701	6.70466e-18	17.1736	1153	219	54	21017	ABCC8,ADRA2A,AKT2,BECN1,BNIP3,CSK,DNMT3A,EHMT2,EP300,GRIA1,IRAK2,JUN,KAT2B,KDM6A,LGMN,MDM2,MEF2C,MSN,NFE2L2,NGFR,NPTX1,NQO1,PCNA,PEX14,PIK3CA,PRDX1,PRKACA,PRKCQ,RHOA,RIPK1,RIPK2,SESN1,SIN3A,SOD2,SOX9,SPP1,TET1,TP53,TRPM4,ABL1,AMIGO1,APC,CHRNA7,DRD2,HCN1,HGF,ITPR1,MMP2,NR4A2,PPP3CA,PRKAA2,PRKN,SORL1,TSPO
GO:BP	synaptic signaling	GO:0099536	8.75048e-18	17.058	783	219	45	21017	ABCC8,ADRA2A,APOE,BDNF,CLSTN1,DLG4,FABP5,GRIA1,GRIA2,GRIN2B,GRM2,GRM3,KAT2A,LGMN,MEF2C,NGFR,NLGN1,NPTX1,NQO1,PRKACA,PRKAR2B,RELN,SLC17A6,SLC6A1,SYP,ABL1,BCHE,CACNB4,CALB2,CHRNA7,CNR1,DBH,DRD2,FGF12,GABRG2,GABRR1,GAD1,HAP1,ITPR1,NTF3,PNKD,PPP3CA,PRKCG,PRKN,SLC12A5
GO:BP	trans-synaptic signaling	GO:0099537	1.8361e-17	16.7361	759	219	44	21017	ABCC8,ADRA2A,APOE,BDNF,CLSTN1,DLG4,FABP5,GRIA1,GRIA2,GRIN2B,GRM2,GRM3,KAT2A,LGMN,MEF2C,NGFR,NLGN1,NPTX1,NQO1,PRKACA,PRKAR2B,RELN,SLC17A6,SLC6A1,SYP,ABL1,BCHE,CACNB4,CALB2,CHRNA7,CNR1,DBH,DRD2,FGF12,GABRG2,GABRR1,GAD1,HAP1,NTF3,PNKD,PPP3CA,PRKCG,PRKN,SLC12A5
GO:BP	regulation of localization	GO:0032879	3.59784e-17	16.444	2005	219	70	21017	ABCC8,ADRA2A,AKT2,APOE,ATG3,ATG5,BAG3,BAG4,BCL2,BDNF,BECN1,BNIP3L,CD47,CNN2,CSK,DAB2,DLG4,EP300,FABP5,GRIN2B,GRM2,GSN,KAT2B,LAMP1,MDM2,MEF2C,MSN,NFE2L2,NGFR,NLGN1,PIK3CA,PRKACA,RAB7A,RAC1,RALB,RELN,RIPK1,S100A10,SIN3A,SLC6A1,SPP1,SYP,TNFRSF1A,TRPM4,VPS4A,ABL1,ADCYAP1,AMIGO1,APC,CACNA1C,CACNB4,CLU,CNR1,CNTN1,DRD2,FGF12,FGF2,HAP1,ITPR1,NTF3,PNKD,PPP3CA,PRKAA2,PRKCG,PRKN,RYR1,RYR2,SORL1,TF,TSPO
GO:BP	regulation of signal transduction	GO:0009966	4.1068e-17	16.3865	3020	219	87	21017	ADRA2A,APOE,ATF3,ATR,BAG4,BCL2,BDNF,BECN1,BMI1,CASP2,CD47,CSK,CYP7B1,DAB2,DLG4,DOT1L,DUSP7,EP300,FABP5,GRIN2B,GRM2,HDAC1,HSPB1,IFNAR2,IRAK2,KDM6A,LAMP2,LGMN,MDM2,MEF2C,MYORG,NFE2L2,NGFR,NLGN1,OPTN,PAK1,PIK3CA,PRDX1,PRKACA,PRKCQ,RAB7A,RAC1,RAD9A,RALB,RELN,RHOA,RIPK1,RIPK2,SESN1,SIN3A,SOD2,SOX9,STMN1,SYP,TARBP2,TET1,TMEM64,TNFRSF10B,TNFRSF1A,TP53,TRPM4,ABL1,ADCYAP1,AKT1S1,APAF1,APC,ARHGEF10,CHRNA7,…
GO:BP	regulation of biological quality	GO:0065008	5.84769e-17	16.233	2847	219	84	21017	ABCC8,ADRA2A,APOE,ATG5,BAG3,BAG4,BCL2,BDNF,BNIP3,BNIP3L,CLIC4,CLSTN1,COTL1,DAB2,DLG4,EP300,GRIA1,GRIA2,GRIN2B,GRM2,GRN,GSN,HSPB1,KAT2A,KAT2B,KDM6A,LAMP1,LAMP2,LGMN,MDM2,MEF2C,MSN,NFE2L2,NLGN1,NPTX1,NRP2,PIK3CA,PRKACA,PRKCQ,PROS1,RAB7A,RAC1,RELN,RHOA,SIN3A,SLC17A6,SOD2,SPP1,SYP,TP53,TRPM4,TSPAN18,ABL1,ADCYAP1,AKT1S1,AMIGO1,ATP6V0E1,BCHE,CACNA1C,CACNB4,CALB2,CCND1,CHRNA7,CLU,CNR1,DBH,DRD2,FGF12,GAB…
GO:BP	cellular homeostasis	GO:0019725	7.23292e-17	16.1407	826	219	45	21017	ABCC8,ADRA2A,APOE,ATG5,BAG3,BCL2,BNIP3,CLIC4,GRIA1,GRM2,GRN,LACC1,LAMP1,LAMP2,NFE2L2,NGFR,NPTX1,NQO1,PIK3CA,PRDX1,PRKACA,RAB7A,SIN3A,SOD2,TMEM64,TRPM4,ABL1,ATP6V0E1,CACNA1C,CACNB4,CALB2,CHRNA7,CNR1,DRD2,FGF2,HAP1,ITPR1,NAGLU,PPP3CA,PRKAA2,PRKN,RYR1,RYR2,SLC12A5,TF
GO:BP	chemical synaptic transmission	GO:0007268	9.58186e-17	16.0186	753	219	43	21017	ABCC8,ADRA2A,APOE,BDNF,CLSTN1,DLG4,GRIA1,GRIA2,GRIN2B,GRM2,GRM3,KAT2A,LGMN,MEF2C,NGFR,NLGN1,NPTX1,NQO1,PRKACA,PRKAR2B,RELN,SLC17A6,SLC6A1,SYP,ABL1,BCHE,CACNB4,CALB2,CHRNA7,CNR1,DBH,DRD2,FGF12,GABRG2,GABRR1,GAD1,HAP1,NTF3,PNKD,PPP3CA,PRKCG,PRKN,SLC12A5
GO:BP	anterograde trans-synaptic signaling	GO:0098916	9.58186e-17	16.0186	753	219	43	21017	ABCC8,ADRA2A,APOE,BDNF,CLSTN1,DLG4,GRIA1,GRIA2,GRIN2B,GRM2,GRM3,KAT2A,LGMN,MEF2C,NGFR,NLGN1,NPTX1,NQO1,PRKACA,PRKAR2B,RELN,SLC17A6,SLC6A1,SYP,ABL1,BCHE,CACNB4,CALB2,CHRNA7,CNR1,DBH,DRD2,FGF12,GABRG2,GABRR1,GAD1,HAP1,NTF3,PNKD,PPP3CA,PRKCG,PRKN,SLC12A5
GO:BP	neurogenesis	GO:0022008	2.29541e-16	15.6391	1746	219	64	21017	ABCC8,AKT2,APOE,BCL2,BDNF,BECN1,BNIP3,CSK,DAB2,DLG4,DNMT3A,EHMT2,EP300,GRN,HDAC1,HPRT1,KAT2B,MDM2,MEF2C,NFE2L2,NGFR,NLGN1,NPTX1,NRP2,PAK1,PRKCQ,RAB6B,RAC1,RELN,RHOA,S100A10,SIN3A,SOD2,SOX9,SPP1,STMN1,TP53,ABL1,ADCYAP1,AMIGO1,ARHGEF10,BCHE,CCND1,CHRNA7,CLU,CNR1,CNTN1,DRD2,EPHA6,FGF2,HAP1,HCN1,MMP2,NAGLU,NEGR1,NKX6-2,NR4A2,NTF3,PPP3CA,PRKN,SLC12A5,SORL1,TENM2,TSPO
GO:BP	regulation of phosphate metabolic process	GO:0019220	3.07209e-16	15.5126	1071	219	50	21017	ADRA2A,APOE,BAG4,BCL2,BDNF,CDKN1A,DAB2,DLG4,DUSP7,EP300,HSPB1,KAT2B,KDM4D,LACC1,MEF2C,MRE11,PAK1,PIK3CA,PILRB,PRKACA,PRKAR2A,PRKAR2B,RAC1,RAD50,RALB,RELN,RHOA,RIPK1,RIPK2,SOX9,TARBP2,TNFRSF10B,TNFRSF1A,TP53,ABL1,ADCYAP1,AKT1S1,APC,CCND1,CHRNA7,DRD2,FGF2,HGF,NTF3,PRKAA2,PRKN,RASGRP1,TAZ,TF,TSPO
GO:BP	regulation of phosphorus metabolic process	GO:0051174	3.19576e-16	15.4954	1072	219	50	21017	ADRA2A,APOE,BAG4,BCL2,BDNF,CDKN1A,DAB2,DLG4,DUSP7,EP300,HSPB1,KAT2B,KDM4D,LACC1,MEF2C,MRE11,PAK1,PIK3CA,PILRB,PRKACA,PRKAR2A,PRKAR2B,RAC1,RAD50,RALB,RELN,RHOA,RIPK1,RIPK2,SOX9,TARBP2,TNFRSF10B,TNFRSF1A,TP53,ABL1,ADCYAP1,AKT1S1,APC,CCND1,CHRNA7,DRD2,FGF2,HGF,NTF3,PRKAA2,PRKN,RASGRP1,TAZ,TF,TSPO
GO:BP	regulation of protein metabolic process	GO:0051246	3.28158e-16	15.4839	1975	219	68	21017	ADRA2A,AGO4,AKT2,APOE,ATG5,BAG4,BCL2,BDNF,BMI1,CDKN1A,DAB2,DLG4,DUSP7,EHMT2,EIF1,EP300,GRIN2B,GRN,GSN,HDAC1,HSPB1,KAT2A,KAT2B,KDM4D,LGMN,MDM2,MRE11,MSN,NFE2L2,NQO1,PAK1,PIK3CA,PILRB,PRKACA,PRKAR2A,PRKAR2B,RAB7A,RAC1,RAD50,RALB,RELN,RHOA,RIPK1,RIPK2,S100A10,SOX9,TARBP2,TNFRSF10B,TNFRSF1A,TP53,ABL1,ADCYAP1,AKT1S1,APC,CCND1,CHRNA7,CLU,DRD2,FGF2,HAP1,HGF,NTF3,PRKAA2,PRKCG,PRKN,RASGRP1,SORL1,TSPO
GO:BP	cell surface receptor signaling pathway	GO:0007166	3.5778e-16	15.4464	2803	219	82	21017	ADRA2A,AKT2,APOE,ATF3,BAG3,BCL2,BDNF,BECN1,CASP2,CD47,CD8A,CSK,DAB2,DLG4,DOCK1,DOT1L,EP300,GRIA1,GRIA2,GRIN2B,GRM2,GRM3,HDAC1,HSPB1,IFNAR2,IGF2R,IRAK2,JUN,LGMN,MAP3K1,MEF2C,MYORG,NGFR,NLGN1,NRP2,PAK1,PIK3CA,PILRB,PRKACA,PRKCQ,RAB7A,RAC1,RALB,RELN,RHOA,RIPK1,RIPK2,SIN3A,SOX9,STMN1,TET1,TMEM64,TNFRSF10B,TNFRSF1A,TP53,TRPM4,ABL1,AKT1S1,APC,CACNB4,CCND1,CHRNA7,CNTN1,COL4A2,DBH,DRD2,EGFL7,EPHA6,FGF2,H…
GO:BP	regulation of trans-synaptic signaling	GO:0099177	4.1224e-16	15.3848	491	219	35	21017	ADRA2A,APOE,BDNF,CLSTN1,DLG4,FABP5,GRIA1,GRIA2,GRIN2B,GRM2,GRM3,KAT2A,LGMN,MEF2C,NGFR,NLGN1,PRKACA,PRKAR2B,RELN,SLC6A1,SYP,ABL1,BCHE,CACNB4,CALB2,CHRNA7,CNR1,DRD2,GABRR1,HAP1,NTF3,PNKD,PPP3CA,PRKCG,PRKN
GO:BP	regulation of cellular component organization	GO:0051128	5.77362e-16	15.2386	2398	219	75	21017	ABCC8,APOE,ATG3,ATG5,ATR,BAG4,BCL2,BDNF,BECN1,BNIP3,CD47,CDKN1A,CLIC4,CLSTN1,CNN2,COTL1,CSK,DAB2,DLG4,EHMT2,EP300,GRIN2B,GRN,GSN,KAT2A,KAT2B,LAMP2,MDM2,MEF2C,MRE11,MSN,NCAPH,NFE2L2,NLGN1,NRP2,OSGIN1,PAK1,PIK3CA,PRKACA,PRKCQ,RAB7A,RAC1,RAD50,RALB,RELN,RHOA,S100A10,SIN3A,SOX9,SPP1,STMN1,TET1,TNFRSF1A,TP53,ABL1,AMIGO1,APC,ARHGEF10,CHRNA7,CLU,CNR1,CNTN1,DRD2,HAP1,HGF,NEGR1,NES,NTF3,PPP3CA,PRKAA2,PRKC…
GO:BP	positive regulation of response to stimulus	GO:0048584	7.85823e-16	15.1047	2293	219	73	21017	ADRA2A,APOE,ATF3,ATR,BAG4,BCL2,BDNF,BECN1,CASP2,CASP6,CD47,CD8A,CSK,DAB2,DLG4,DNMT3A,EP300,EPG5,FABP5,GRIN2B,GRM2,GRN,HSPB1,IRAK2,KDM4D,LACC1,LAMP1,LAMP2,LGMN,MEF2C,MYORG,NFE2L2,NGFR,NLGN1,OPTN,PAK1,PCNA,PIK3CA,PRKCQ,RAC1,RAD9A,RALB,RELN,RHOA,RIPK1,RIPK2,SIN3A,SOX9,TARBP2,TNFRSF10B,TNFRSF1A,TP53,TRPM4,ABL1,ADCYAP1,APAF1,CACNB4,CHRNA7,CLU,CNR1,DRD2,FGF2,HAP1,HGF,MAPKAPK2,MMP2,NAGLU,NTF3,PPP3CA,PRK…
GO:BP	response to endogenous stimulus	GO:0009719	8.15201e-16	15.0887	1478	219	58	21017	ABCC8,ADRA2A,AKT2,APOE,BAG4,BCL2,BDNF,BECN1,CDKN1A,CSK,CYP7B1,DAB2,EP300,GRIA1,HDAC1,HSPB1,JUN,KAT2A,KAT2B,KDM6A,LGMN,MDM2,MEF2C,NFE2L2,NGFR,NQO1,NRP2,PAK1,PCNA,PIK3CA,PRKACA,PRKCQ,RHOA,RIPK1,SIN3A,SMC1A,SOX9,SPP1,TET1,TP53,ABL1,AKT1S1,APAF1,APC,BCHE,CCND1,COL4A2,FGF2,HAP1,HGF,MAPKAPK2,MMP2,NR4A2,NTF3,PPP3CA,PRKAA2,SORL1,TSPO
GO:BP	cellular response to nitrogen compound	GO:1901699	1.57189e-15	14.8036	618	219	38	21017	AKT2,CASP6,CSK,EHMT2,EP300,EPG5,GRIA1,KAT2B,KDM6A,LGMN,MDM2,MEF2C,NFE2L2,NGFR,PIK3CA,PRKACA,PRKCQ,RALB,RIPK2,SESN1,SIN3A,SOX9,TP53,TRPM4,ABL1,AMIGO1,APC,CHRNA7,DRD2,GABRG2,HCN1,ITPR1,NR4A2,PPP3CA,PRKN,RYR1,RYR2,SORL1
GO:BP	anatomical structure morphogenesis	GO:0009653	1.9156e-15	14.7177	2692	219	79	21017	ABCC8,AGO4,APOE,ASB2,BCL2,BDNF,BMI1,BNIP3,CD47,CLIC4,CRIP1,CYP7B1,DLG4,DOCK1,EP300,GRN,HDAC1,HPRT1,HSPB1,JAM2,KAT2A,KDM6A,LIG1,MAFB,MDM2,MEF2C,MSN,NFE2L2,NGFR,NLGN1,NPTX1,NRP2,PAK1,PIK3CA,PRKACA,PRKCQ,RAC1,RELN,RHOA,SIN3A,SLC17A6,SOX9,SPP1,STMN1,TET1,TNFRSF1A,TP53,TPD52,TSPAN18,ABL1,ACTN1,AMIGO1,APAF1,APC,CACNA1C,CHRNA7,CLU,CNTN1,COL4A2,DRD2,EGFL7,EPHA6,FGF2,HCN1,HDAC7,HGF,ITGA7,ITPR1,MMP2,NAGLU,…
GO:BP	cell-cell signaling	GO:0007267	2.61278e-15	14.5829	1316	219	54	21017	ABCC8,ADRA2A,APOE,BDNF,CLSTN1,DAB2,DLG4,FABP5,GRIA1,GRIA2,GRIN2B,GRM2,GRM3,KAT2A,LGMN,MEF2C,NGFR,NLGN1,NPTX1,NQO1,PRKACA,PRKAR2B,RELN,SLC17A6,SLC6A1,SPP1,SYP,TRPM4,ABL1,ADCYAP1,BCHE,CACNA1C,CACNB4,CALB2,CHRNA7,CNR1,DBH,DRD2,FGF12,FGF2,GABRG2,GABRR1,GAD1,HAP1,HGF,ITPR1,NTF3,PNKD,PPP3CA,PRKCG,PRKN,RYR2,SLC12A5,TSPO
GO:BP	response to organic cyclic compound	GO:0014070	2.98887e-15	14.5245	909	219	45	21017	BCL2,BECN1,CASP6,CD83,CDKN1A,CYP7B1,DAB2,DNMT3A,EHMT2,EP300,EPG5,GRIA1,GRM2,HDAC1,KAT2A,KDM6A,MDM2,MEF2C,MSN,NQO1,PAK1,PCNA,PIK3CA,RALB,RHOA,RIPK2,SIN3A,SLC6A1,SOD2,SOX9,SPP1,TRPM4,ABL1,BCHE,CNR1,DRD2,GABRG2,HCN1,MMP2,NAGLU,PRKCG,PRKN,RYR1,RYR2,TSPO
GO:BP	modulation of chemical synaptic transmission	GO:0050804	3.27484e-15	14.4848	490	219	34	21017	ADRA2A,APOE,BDNF,CLSTN1,DLG4,GRIA1,GRIA2,GRIN2B,GRM2,GRM3,KAT2A,LGMN,MEF2C,NGFR,NLGN1,PRKACA,PRKAR2B,RELN,SLC6A1,SYP,ABL1,BCHE,CACNB4,CALB2,CHRNA7,CNR1,DRD2,GABRR1,HAP1,NTF3,PNKD,PPP3CA,PRKCG,PRKN
GO:BP	neuron apoptotic process	GO:0051402	3.99067e-15	14.399	281	219	27	21017	AKT2,APOE,BCL2,BDNF,BNIP3,CASP2,GRN,LGMN,MEF2C,NGFR,NQO1,PIK3CA,RHOA,RIPK1,SOD2,TP53,ABL1,AKT1S1,APAF1,CCND1,CLU,MMP2,NES,NR4A2,NTF3,PRKCG,PRKN
GO:BP	regulation of multicellular organismal process	GO:0051239	5.32159e-15	14.274	2928	219	82	21017	ABCC8,ADRA2A,APOE,ATG5,BCL2,BDNF,BECN1,BMI1,CD47,CD83,CDKN1A,CLSTN1,CSK,DAB2,DLG4,DOCK1,FABP5,GRIN2B,GRN,HDAC1,HSPB1,JAM2,KAT2A,KAT2B,LACC1,LGMN,MAFB,MAFF,MDM2,MEF2C,NFE2L2,NGFR,NLGN1,PIK3CA,PRKACA,PRKCQ,PROS1,RAC1,RELB,RELN,RHOA,RIPK1,RIPK2,S100A10,SIN3A,SOX9,SPP1,TET1,TMEM64,TNFRSF1A,TP53,TRPM4,TSPAN18,ABL1,ADCYAP1,AMIGO1,APC,CACNA1C,CAMK4,CCND1,CHRNA7,CLU,CNR1,COL4A2,DBH,DRD2,FGF12,FGF2,HAP1,H…
GO:BP	intracellular chemical homeostasis	GO:0055082	6.98749e-15	14.1557	723	219	40	21017	ABCC8,ADRA2A,APOE,ATG5,BCL2,BNIP3,CLIC4,GRIA1,GRM2,GRN,LACC1,LAMP1,LAMP2,NGFR,NPTX1,PIK3CA,PRKACA,RAB7A,SIN3A,SOD2,TMEM64,TRPM4,ABL1,ATP6V0E1,CACNA1C,CACNB4,CALB2,CHRNA7,CNR1,DRD2,FGF2,HAP1,ITPR1,NAGLU,PPP3CA,PRKAA2,RYR1,RYR2,SLC12A5,TF
GO:BP	homeostatic process	GO:0042592	8.32787e-15	14.0795	1711	219	61	21017	ABCC8,ADRA2A,APOE,ATG5,BAG3,BCL2,BNIP3,CLIC4,CSK,CYP7B1,FABP5,GRIA1,GRM2,GRN,JAM2,LACC1,LAMP1,LAMP2,MAFB,MEF2C,NFE2L2,NGFR,NPTX1,NQO1,PIK3CA,PRDX1,PRKACA,RAB7A,SIN3A,SLC17A6,SOD2,SOX9,SPP1,SUV39H1,TMEM64,TRPM4,ABL1,ADCYAP1,APC,ATP6V0E1,CACNA1C,CACNB4,CALB2,CHRNA7,CNR1,CRTC2,DBH,DRD2,FGF2,HAP1,ITPR1,NAGLU,PPP3CA,PRKAA2,PRKN,RYR1,RYR2,SLC12A5,SORL1,TF,TSPO
GO:BP	positive regulation of macromolecule metabolic process	GO:0010604	9.42346e-15	14.0258	3349	219	88	21017	ABCC8,ADRA2A,AKT2,APOE,ATF3,ATR,BAG4,BCL2,BDNF,BMI1,CD83,CDKN1A,CNN2,DAB2,DLG4,DOT1L,EIF1,EP300,EPCAM,GRIA1,GRIN2B,GRN,GSN,HDAC1,HSPB1,JUN,KAT2A,KAT2B,KDM4D,KDM6A,KMT2C,LACC1,LGMN,MAFB,MAFF,MDM2,MEF2C,MRE11,MSN,NFE2L2,NGFR,PAK1,PCNA,PILRB,PRKCQ,PTMS,RAB7A,RAC1,RAD50,RALB,RELB,RELN,RHOA,RIPK1,RIPK2,S100A10,SOX9,SPP1,TET1,TNFRSF10B,TNFRSF1A,TP53,ABL1,ACTN1,ADCYAP1,APC,CAMK4,CCND1,CHRNA7,CLU,CNTN1,C…
GO:BP	negative regulation of signaling	GO:0023057	1.01911e-14	13.9918	1407	219	55	21017	ABCC8,ADRA2A,APOE,ATF3,BCL2,BDNF,BMI1,CSK,CYP7B1,DAB2,DUSP7,GRIA1,GRM2,HDAC1,HSPB1,KDM6A,LAMP2,LGMN,MDM2,NFE2L2,NGFR,OPTN,PRKACA,PRKCQ,RAB7A,RHOA,RIPK1,SESN1,SIN3A,SLC6A1,SOD2,SOX9,STMN1,TARBP2,TET1,TMEM64,TP53,ABL1,AKT1S1,APC,BCHE,CLU,DRD2,EGFL7,FGF2,HDAC7,HGF,ITPR1,NR4A2,PPP3CA,PRKAA2,PRKN,PTPRR,SORL1,TSPO
GO:BP	negative regulation of cell communication	GO:0010648	1.01911e-14	13.9918	1407	219	55	21017	ABCC8,ADRA2A,APOE,ATF3,BCL2,BDNF,BMI1,CSK,CYP7B1,DAB2,DUSP7,GRIA1,GRM2,HDAC1,HSPB1,KDM6A,LAMP2,LGMN,MDM2,NFE2L2,NGFR,OPTN,PRKACA,PRKCQ,RAB7A,RHOA,RIPK1,SESN1,SIN3A,SLC6A1,SOD2,SOX9,STMN1,TARBP2,TET1,TMEM64,TP53,ABL1,AKT1S1,APC,BCHE,CLU,DRD2,EGFL7,FGF2,HDAC7,HGF,ITPR1,NR4A2,PPP3CA,PRKAA2,PRKN,PTPRR,SORL1,TSPO
GO:BP	regulation of protein modification process	GO:0031399	1.07519e-14	13.9685	1166	219	50	21017	ADRA2A,APOE,ATG5,BAG4,BCL2,BDNF,BMI1,CDKN1A,DAB2,DLG4,DUSP7,EHMT2,EP300,HSPB1,KAT2A,KAT2B,KDM4D,MRE11,PAK1,PIK3CA,PILRB,PRKAR2A,PRKAR2B,RAC1,RAD50,RALB,RELN,RHOA,RIPK1,RIPK2,SOX9,TARBP2,TNFRSF10B,TNFRSF1A,TP53,ABL1,ADCYAP1,AKT1S1,APC,CCND1,CHRNA7,DRD2,FGF2,HGF,NTF3,PRKAA2,PRKCG,PRKN,RASGRP1,TSPO
GO:BP	negative regulation of programmed cell death	GO:0043069	1.12966e-14	13.9471	898	219	44	21017	AGO4,APOE,ATG5,BAG3,BAG4,BCL2,BDNF,BECN1,BMI1,BNIP3,BNIP3L,CASP2,CDKN1A,DAB2,GRN,HDAC1,HSPB1,KDM6A,LGMN,MDM2,MEF2C,MRE11,NFE2L2,NQO1,PIK3CA,PRKCQ,PTMS,RHOA,RIPK1,SIN3A,SOD2,SOX9,TP53,ABL1,CCND1,CLU,HGF,MUTYH,NES,NR4A2,NTF3,PRKAA2,PRKCG,PRKN
GO:BP	positive regulation of cellular component organization	GO:0051130	2.20915e-14	13.6558	1093	219	48	21017	ABCC8,APOE,ATR,BAG4,BDNF,BECN1,BNIP3,CD47,CLSTN1,DAB2,DLG4,EP300,GRN,GSN,KAT2A,KAT2B,MRE11,MSN,NCAPH,NFE2L2,NLGN1,PAK1,PIK3CA,PRKCQ,RAC1,RAD50,RALB,RELN,RHOA,S100A10,SOX9,TP53,ABL1,AMIGO1,APC,ARHGEF10,CLU,CNR1,CNTN1,DRD2,HAP1,NEGR1,NES,NTF3,PPP3CA,PRKN,TENM2,TF
GO:BP	negative regulation of apoptotic process	GO:0043066	2.26728e-14	13.6445	872	219	43	21017	AGO4,APOE,ATG5,BAG3,BAG4,BCL2,BDNF,BECN1,BMI1,BNIP3,BNIP3L,CASP2,CDKN1A,DAB2,GRN,HDAC1,HSPB1,KDM6A,LGMN,MDM2,MEF2C,MRE11,NFE2L2,NQO1,PIK3CA,PRKCQ,PTMS,RHOA,RIPK1,SIN3A,SOD2,SOX9,TP53,ABL1,CCND1,CLU,HGF,NES,NR4A2,NTF3,PRKAA2,PRKCG,PRKN
GO:BP	response to metal ion	GO:0010038	2.49576e-14	13.6028	360	219	29	21017	ABCC8,ATG5,BCL2,BECN1,BNIP3,CLIC4,CRIP1,DLG4,DNMT3A,GRIA1,JUN,LGMN,MDM2,MEF2C,NFE2L2,NLGN1,NPTX1,NQO1,PCNA,SLC6A1,SOD2,DRD2,PPP3CA,PRKAA2,PRKN,RYR1,RYR2,TF,TSPO
GO:BP	protein phosphorylation	GO:0006468	2.97604e-14	13.5264	1341	219	53	21017	ADRA2A,AKT2,APOE,ATR,BAG4,BCL2,BDNF,CDKN1A,CSK,DAB2,DLG4,DUSP7,HSPB1,IRAK2,KDM4D,MAP3K1,MRE11,PAK1,PIK3CA,PILRB,PRKACA,PRKAR2A,PRKAR2B,PRKCQ,RAC1,RAD50,RALB,RELN,RHOA,RIPK1,RIPK2,SOX9,TARBP2,TNFRSF10B,TNFRSF1A,TP53,ABL1,ADCYAP1,AKT1S1,APC,CAMK4,CCND1,CHRNA7,DRD2,EPHA6,FGF2,HGF,MAPKAPK2,NTF3,PRKAA2,PRKCG,PRKN,RASGRP1
GO:BP	regulation of primary metabolic process	GO:0080090	3.70278e-14	13.4315	5486	219	116	21017	ADRA2A,AGO4,AKT2,APOE,ATF3,ATG5,ATR,BAG4,BCL2,BDNF,BMI1,CDKN1A,CKS1B,DAB2,DLG4,DNMT3A,DOT1L,DUSP7,EHMT2,EIF1,EP300,EPCAM,FABP5,GRIN2B,GRN,GSN,HDAC1,HPRT1,HSPB1,IRAK2,JUN,KAT2A,KAT2B,KDM4D,KDM5C,KDM6A,KMT2C,LACC1,LGMN,MAFB,MAFF,MCM6,MDM2,MEF2C,MRE11,MSN,NFE2L2,NGFR,NQO1,PAK1,PCNA,PEX14,PIK3CA,PILRB,PRKACA,PRKAR2A,PRKAR2B,PRKCQ,PTMS,RAB7A,RAC1,RAD50,RALB,RELB,RELN,RHOA,RIPK1,RIPK2,S100A10,SETDB1,SI…
GO:BP	learning or memory	GO:0007611	4.13602e-14	13.3834	280	219	26	21017	ABCC8,APOE,BDNF,DLG4,EHMT2,EP300,GRIA1,GRIN2B,KAT2A,KAT2B,LGMN,MEF2C,PRKAR2B,RELN,SLC6A1,ABL1,BCHE,CAMK4,CHRNA7,CNR1,DBH,DRD2,NTF3,PRKCG,PRKN,SLC12A5
GO:BP	chemical homeostasis	GO:0048878	5.44877e-14	13.2637	1026	219	46	21017	ABCC8,ADRA2A,APOE,ATG5,BCL2,BNIP3,CLIC4,CYP7B1,FABP5,GRIA1,GRM2,GRN,LACC1,LAMP1,LAMP2,NGFR,NPTX1,PIK3CA,PRKACA,RAB7A,SIN3A,SLC17A6,SOD2,TMEM64,TRPM4,ABL1,ATP6V0E1,CACNA1C,CACNB4,CALB2,CHRNA7,CNR1,CRTC2,DBH,DRD2,FGF2,HAP1,ITPR1,NAGLU,PPP3CA,PRKAA2,RYR1,RYR2,SLC12A5,TF,TSPO
GO:BP	regulation of metabolic process	GO:0019222	1.14173e-13	12.9424	7076	219	134	21017	ABCC8,ADRA2A,AGO4,AKT2,APOE,ATF3,ATG5,ATR,BAG3,BAG4,BCL2,BDNF,BECN1,BMI1,BNIP3,BNIP3L,CD47,CD83,CDKN1A,CKS1B,CNN2,CRIP1,CSK,DAB2,DLG4,DNMT3A,DOT1L,DUSP7,EHMT2,EIF1,EP300,EPCAM,FABP5,GRIA1,GRIN2B,GRN,GSN,HDAC1,HPRT1,HSPB1,IRAK2,JUN,KAT2A,KAT2B,KDM4D,KDM5C,KDM6A,KMT2C,LACC1,LGMN,MAFB,MAFF,MCM6,MDM2,MEF2C,MRE11,MSN,NFE2L2,NGFR,NQO1,OPTN,PAK1,PCNA,PEX14,PIK3CA,PILRB,PRKACA,PRKAR2A,PRKAR2B,PRKCQ,PTMS,…
GO:BP	regulation of catalytic activity	GO:0050790	1.95835e-13	12.7081	1015	219	45	21017	ADRA2A,APOE,BMI1,CDKN1A,DLG4,DUSP7,GRIN2B,GRM2,GRM3,GRN,HDAC1,HSPB1,KAT2B,LGMN,MEF2C,MRE11,PAK1,PCNA,PILRB,PRKAR2A,PRKAR2B,RAD50,RALB,RELN,RHOA,RIPK2,S100A10,STMN1,TARBP2,TNFRSF10B,TP53,ABL1,ADCYAP1,AKT1S1,APC,ARHGEF10,CACNA1C,CCND1,CHRNA7,DRD2,FGF2,NES,NTF3,PRKN,RASGRP1
GO:BP	generation of neurons	GO:0048699	2.80338e-13	12.5523	1517	219	55	21017	APOE,BCL2,BDNF,BECN1,DAB2,DLG4,DNMT3A,EHMT2,EP300,GRN,HDAC1,HPRT1,KAT2B,MDM2,MEF2C,NFE2L2,NGFR,NLGN1,NPTX1,NRP2,PAK1,PRKCQ,RAB6B,RAC1,RELN,RHOA,SIN3A,SOD2,SOX9,SPP1,STMN1,TP53,ABL1,ADCYAP1,AMIGO1,BCHE,CCND1,CHRNA7,CNR1,CNTN1,DRD2,EPHA6,FGF2,HCN1,MMP2,NAGLU,NEGR1,NKX6-2,NR4A2,NTF3,PPP3CA,PRKN,SLC12A5,TENM2,TSPO
GO:BP	response to external stimulus	GO:0009605	2.88492e-13	12.5399	2367	219	70	21017	ABCC8,APOE,ATG5,ATR,BAG3,BCL2,BECN1,BNIP3,BNIP3L,CASP2,CASP6,CD47,CNN2,COTL1,CYP7B1,EP300,EPG5,GRN,GSN,HSPB1,IFNAR2,IRAK2,LACC1,LAMP1,LAMP2,LGMN,MAP3K1,MEF2C,NFE2L2,NGFR,NQO1,NRP2,OPTN,PAK1,PIK3CA,PRDX1,PRKCQ,PROS1,RAB7A,RAC1,RELB,RHOA,RIPK1,RIPK2,SIN3A,SOD2,SOX9,SPP1,STMN1,TARBP2,TNFRSF10B,TNFRSF1A,TP53,TRPM4,ABL1,CACNB4,CLU,CNR1,DRD2,FGF2,HGF,MAPKAPK2,MMP2,NAGLU,NTF3,PRKN,RASGRP1,RYR2,TF,TSPO
GO:BP	regulation of cell migration	GO:0030334	3.20562e-13	12.4941	938	219	43	21017	ABCC8,ADRA2A,AKT2,APOE,BAG4,BCL2,CD47,CLIC4,CNN2,DAB2,DOCK1,GRN,HDAC1,HSPB1,JAM2,LGMN,MDM2,MEF2C,MSN,NFE2L2,NGFR,NRP2,OSGIN1,PAK1,RAC1,RELN,RHOA,SIN3A,SOD2,SOX9,STMN1,TET1,ABL1,APC,DRD2,FGF2,HDAC7,HGF,MMP2,NTF3,PPP3CA,PTPRR,SORL1
GO:BP	regulation of transport	GO:0051049	4.80321e-13	12.3185	1589	219	56	21017	ABCC8,ADRA2A,AKT2,APOE,ATG3,ATG5,BAG3,BCL2,CD47,CNN2,CSK,DAB2,DLG4,EP300,FABP5,GRIN2B,GRM2,LAMP1,MDM2,MEF2C,MSN,NFE2L2,NLGN1,PRKACA,RAB7A,RAC1,RELN,RIPK1,S100A10,SLC6A1,SPP1,SYP,TNFRSF1A,TRPM4,VPS4A,ABL1,ADCYAP1,AMIGO1,CACNA1C,CACNB4,CLU,CNR1,CNTN1,DRD2,FGF12,HAP1,ITPR1,NTF3,PNKD,PPP3CA,PRKCG,PRKN,RYR2,SORL1,TF,TSPO
GO:BP	positive regulation of multicellular organismal process	GO:0051240	4.98149e-13	12.3026	1644	219	57	21017	ABCC8,ADRA2A,APOE,ATG5,BCL2,BDNF,BECN1,BMI1,CD47,CD83,CDKN1A,CLSTN1,CSK,DAB2,FABP5,GRN,HDAC1,HSPB1,KAT2A,LACC1,MEF2C,NFE2L2,NGFR,NLGN1,PIK3CA,PRKCQ,RELN,RHOA,RIPK1,RIPK2,SIN3A,SOX9,SPP1,TET1,TMEM64,TRPM4,ABL1,ADCYAP1,AMIGO1,APC,CCND1,CHRNA7,CLU,CNR1,DBH,DRD2,FGF2,HAP1,HGF,MAPKAPK2,NKX6-2,PPP3CA,RASGRP1,RYR2,SORL1,TF,TSPO
GO:BP	neuron differentiation	GO:0030182	5.15477e-13	12.2878	1434	219	53	21017	APOE,BCL2,BDNF,BECN1,DAB2,DLG4,DNMT3A,EHMT2,EP300,GRN,HDAC1,HPRT1,KAT2B,MDM2,MEF2C,NFE2L2,NGFR,NLGN1,NPTX1,NRP2,PAK1,PRKCQ,RAB6B,RAC1,RELN,RHOA,SIN3A,SOD2,SOX9,SPP1,STMN1,ABL1,ADCYAP1,AMIGO1,CCND1,CHRNA7,CNR1,CNTN1,DRD2,EPHA6,FGF2,HCN1,MMP2,NAGLU,NEGR1,NKX6-2,NR4A2,NTF3,PPP3CA,PRKN,SLC12A5,TENM2,TSPO
GO:BP	regulation of cell motility	GO:2000145	6.02282e-13	12.2202	1000	219	44	21017	ABCC8,ADRA2A,AKT2,APOE,BAG4,BCL2,CD47,CLIC4,CNN2,DAB2,DOCK1,GRN,HDAC1,HSPB1,JAM2,LGMN,MDM2,MEF2C,MSN,NFE2L2,NGFR,NRP2,OSGIN1,PAK1,RAC1,RELN,RHOA,SIN3A,SOD2,SOX9,STMN1,TET1,ABL1,APC,DRD2,FGF2,HDAC7,HGF,MMP2,NTF3,PPP3CA,PTPRR,SORL1,TF
GO:BP	cellular response to chemical stress	GO:0062197	6.8564e-13	12.1639	314	219	26	21017	ATG5,BECN1,BNIP3,JUN,KAT2B,MDM2,NFE2L2,NQO1,PCNA,PEX14,PIK3CA,PRDX1,RELB,RIPK1,SIN3A,SOD2,TET1,TP53,ABL1,HGF,MMP2,NAGLU,NR4A2,PRKAA2,PRKN,TSPO
GO:BP	regulation of neuron apoptotic process	GO:0043523	6.9482e-13	12.1581	231	219	23	21017	APOE,BCL2,BDNF,CASP2,GRN,LGMN,MEF2C,NQO1,PIK3CA,RHOA,RIPK1,SOD2,TP53,ABL1,AKT1S1,CCND1,CLU,MMP2,NES,NR4A2,NTF3,PRKCG,PRKN
GO:BP	intracellular signaling cassette	GO:0141124	1.06589e-12	11.9723	1895	219	61	21017	ADRA2A,APOE,ATF3,BAG4,BECN1,CDKN1A,CSK,DAB2,DOCK1,DUSP7,EP300,GRIN2B,GRM2,HDAC1,HSPB1,IRAK2,JUN,MAFB,MAP3K1,MEF2C,MYORG,NFE2L2,NGFR,OPTN,PAK1,PIK3CA,PRDX1,PRKACA,RAC1,RALB,RELB,RELN,RHOA,RIPK1,RIPK2,SOX9,STMN1,TNFRSF10B,TNFRSF1A,TP53,TRPM4,ABL1,ADCYAP1,ARHGEF10,CACNA1C,CHRNA7,DRD2,FGF12,FGF2,HDAC7,HGF,ITPR1,MAPKAPK2,NTF3,PPP3CA,PRKN,PTPRR,RASGRP1,RYR1,RYR2,TF
GO:BP	transport	GO:0006810	1.36956e-12	11.8634	4341	219	98	21017	ABCC8,ADRA2A,AKT2,APOE,ATG3,ATG5,BAG3,BCL2,BECN1,BNIP3,BNIP3L,CD47,CDKN1A,CLIC4,CLSTN1,CNN2,COX5B,CSK,DAB2,DLG4,DOCK1,EP300,EPG5,FABP5,GRIA1,GRIA2,GRIN2B,GRM2,GRN,GSN,HSPB1,IGF2R,LAMP1,LAMP2,MDM2,MEF2C,MSN,NFE2L2,NGFR,NLGN1,NPTX1,OPTN,PAK1,PEX14,PIK3CA,PRKACA,RAB6B,RAB7A,RAC1,RALB,RELN,RIPK1,S100A10,SLC17A6,SLC44A1,SLC6A1,SPP1,SYP,TNFRSF1A,TP53,TPD52,TRPM4,TSPAN18,VPS4A,ABL1,ADCYAP1,AMIGO1,ATP6V0…
GO:BP	phosphorylation	GO:0016310	1.41942e-12	11.8479	1575	219	55	21017	ADRA2A,AKT2,APOE,ATR,BAG4,BCL2,BDNF,CDKN1A,CKS1B,CSK,DAB2,DLG4,DUSP7,HSPB1,IRAK2,KDM4D,MAP3K1,MRE11,PAK1,PIK3CA,PILRB,PRKACA,PRKAR2A,PRKAR2B,PRKCQ,RAC1,RAD50,RALB,RELN,RHOA,RIPK1,RIPK2,SOX9,TARBP2,TNFRSF10B,TNFRSF1A,TP53,ABL1,ADCYAP1,AKT1S1,APC,CAMK4,CCND1,CHRNA7,DRD2,EPHA6,FGF2,HGF,MAPKAPK2,NTF3,PRKAA2,PRKCG,PRKN,RASGRP1,TF
GO:BP	cognition	GO:0050890	1.46475e-12	11.8342	324	219	26	21017	ABCC8,APOE,BDNF,DLG4,EHMT2,EP300,GRIA1,GRIN2B,KAT2A,KAT2B,LGMN,MEF2C,PRKAR2B,RELN,SLC6A1,ABL1,BCHE,CAMK4,CHRNA7,CNR1,DBH,DRD2,NTF3,PRKCG,PRKN,SLC12A5
GO:BP	cellular component organization	GO:0016043	1.7283e-12	11.7624	8108	219	143	21017	ABCC8,ADRA2A,AGO4,AKT2,APOE,ASB2,ATG3,ATG5,ATR,BAG3,BAG4,BCL2,BDNF,BECN1,BMI1,BNIP3,BNIP3L,CD47,CDKN1A,CLIC4,CLSTN1,CNN2,COA5,COTL1,CSK,DAB2,DLG4,DNMT3A,DOCK1,DOT1L,EHMT2,EP300,EPG5,GRIA1,GRIN2B,GRN,GSN,HDAC1,HPRT1,KAT2A,KAT2B,KDM4D,KDM5C,KDM6A,KMT2C,LAMP1,LAMP2,LGMN,MAFB,MCM6,MDM2,MEF2C,MRE11,MSN,NCAPH,NFE2L2,NGFR,NLGN1,NPTX1,NRP2,OPTN,OSGIN1,PAK1,PCNA,PEX14,PIK3CA,PILRB,PPFIA4,PRKACA,PRKCQ,RAB6…
GO:BP	apoptotic signaling pathway	GO:0097190	2.0411e-12	11.6901	606	219	34	21017	ATF3,BAG3,BCL2,BDNF,BECN1,BMI1,BNIP3,BNIP3L,CASP2,CASP6,CDKN1A,CRIP1,EP300,HDAC1,HSPB1,KDM6A,MDM2,NFE2L2,NGFR,RAD9A,RIPK1,SOD2,TNFRSF10B,TNFRSF1A,TP53,ABL1,APAF1,CLU,DBH,HGF,ITPR1,MMP2,NR4A2,PRKN
GO:BP	regulation of protein phosphorylation	GO:0001932	2.33748e-12	11.6313	901	219	41	21017	ADRA2A,APOE,BAG4,BCL2,BDNF,CDKN1A,DAB2,DLG4,DUSP7,HSPB1,KDM4D,MRE11,PAK1,PIK3CA,PILRB,PRKAR2A,PRKAR2B,RAC1,RAD50,RALB,RELN,RHOA,RIPK1,RIPK2,SOX9,TARBP2,TNFRSF10B,TNFRSF1A,TP53,ABL1,ADCYAP1,AKT1S1,APC,CCND1,CHRNA7,DRD2,FGF2,HGF,NTF3,PRKN,RASGRP1
GO:BP	regulation of locomotion	GO:0040012	2.67463e-12	11.5727	1042	219	44	21017	ABCC8,ADRA2A,AKT2,APOE,BAG4,BCL2,CD47,CLIC4,CNN2,DAB2,DOCK1,GRN,HDAC1,HSPB1,JAM2,LGMN,MDM2,MEF2C,MSN,NFE2L2,NGFR,NRP2,OSGIN1,PAK1,RAC1,RELN,RHOA,SIN3A,SOD2,SOX9,STMN1,TET1,ABL1,APC,DRD2,FGF2,HDAC7,HGF,MMP2,NTF3,PPP3CA,PTPRR,SORL1,TF
GO:BP	autophagy	GO:0006914	2.7899e-12	11.5544	574	219	33	21017	ATG3,ATG5,BAG3,BCL2,BECN1,BNIP3,BNIP3L,EHMT2,EP300,EPG5,HSPB1,LAMP2,OPTN,PIK3CA,PRKACA,RAB7A,RALB,RIPK2,SESN1,TP53,VPS4A,ABL1,ATP6V0E1,CLU,DRD2,HAP1,HGF,ITPR1,NAGLU,PRKAA2,PRKN,TAZ,TSPO
GO:BP	process utilizing autophagic mechanism	GO:0061919	2.7899e-12	11.5544	574	219	33	21017	ATG3,ATG5,BAG3,BCL2,BECN1,BNIP3,BNIP3L,EHMT2,EP300,EPG5,HSPB1,LAMP2,OPTN,PIK3CA,PRKACA,RAB7A,RALB,RIPK2,SESN1,TP53,VPS4A,ABL1,ATP6V0E1,CLU,DRD2,HAP1,HGF,ITPR1,NAGLU,PRKAA2,PRKN,TAZ,TSPO
GO:BP	locomotion	GO:0040011	2.91559e-12	11.5353	1238	219	48	21017	ABCC8,ADRA2A,AKT2,APOE,BAG4,BCL2,CD47,CLIC4,CNN2,CYP7B1,DAB2,DOCK1,EP300,GRN,HDAC1,HSPB1,JAM2,LGMN,MDM2,MEF2C,MSN,NFE2L2,NGFR,NRP2,OSGIN1,PAK1,PRKCQ,RAC1,RELN,RHOA,SIN3A,SOD2,SOX9,STMN1,TET1,TRPM4,ABL1,APC,DRD2,FGF2,HDAC7,HGF,MMP2,NTF3,PPP3CA,PTPRR,SORL1,TF
GO:BP	response to nutrient levels	GO:0031667	2.95267e-12	11.5298	501	219	31	21017	APOE,ATF3,ATG5,BCL2,BECN1,BNIP3,CDKN1A,DNMT3A,EHMT2,EP300,KAT2A,KAT2B,KDM6A,LAMP2,MDM2,NFE2L2,NQO1,RALB,SESN1,SETDB1,SOD2,SPP1,SUV39H1,TP53,APAF1,BCHE,CNR1,PRKAA2,PRKCG,SORL1,TSPO
GO:BP	regulation of phosphorylation	GO:0042325	3.1371e-12	11.5035	954	219	42	21017	ADRA2A,APOE,BAG4,BCL2,BDNF,CDKN1A,DAB2,DLG4,DUSP7,HSPB1,KDM4D,MRE11,PAK1,PIK3CA,PILRB,PRKAR2A,PRKAR2B,RAC1,RAD50,RALB,RELN,RHOA,RIPK1,RIPK2,SOX9,TARBP2,TNFRSF10B,TNFRSF1A,TP53,ABL1,ADCYAP1,AKT1S1,APC,CCND1,CHRNA7,DRD2,FGF2,HGF,NTF3,PRKN,RASGRP1,TF
GO:BP	positive regulation of molecular function	GO:0044093	3.76106e-12	11.4247	959	219	42	21017	ADRA2A,APOE,BDNF,BMI1,CDKN1A,DLG4,EP300,GRIN2B,GRN,HDAC1,IRAK2,KDM4D,LGMN,MEF2C,MRE11,PAK1,PCNA,PILRB,PRKCQ,RAD50,RALB,RELN,RHOA,RIPK1,RIPK2,S100A10,STMN1,TNFRSF10B,ABL1,ADCYAP1,ARHGEF10,CACNA1C,CCND1,CHRNA7,CLU,CRTC2,FGF2,HAP1,NTF3,PRKN,RASGRP1,RYR2
GO:BP	phosphate-containing compound metabolic process	GO:0006796	3.79821e-12	11.4204	2550	219	71	21017	ADRA2A,AKT2,APOE,ATR,BAG4,BCL2,BDNF,BECN1,CDKN1A,CKS1B,CSK,DAB2,DLG4,DUSP7,EP300,FABP5,HPRT1,HSPB1,IRAK2,KAT2B,KDM4D,LACC1,MAP3K1,MEF2C,MRE11,NQO1,NTHL1,PAK1,PIK3CA,PILRB,PRKACA,PRKAR2A,PRKAR2B,PRKCQ,RAC1,RAD50,RALB,RELN,RHOA,RIPK1,RIPK2,SLC44A1,SOX9,TARBP2,TNFRSF10B,TNFRSF1A,TP53,ABL1,ADCY9,ADCYAP1,AKT1S1,APC,CACNB4,CAMK4,CCND1,CHRNA7,DRD2,EPHA6,FGF2,HGF,MAPKAPK2,NTF3,PPP3CA,PRKAA2,PRKCG,PRKN,PT…
GO:BP	phosphorus metabolic process	GO:0006793	4.03721e-12	11.3939	2553	219	71	21017	ADRA2A,AKT2,APOE,ATR,BAG4,BCL2,BDNF,BECN1,CDKN1A,CKS1B,CSK,DAB2,DLG4,DUSP7,EP300,FABP5,HPRT1,HSPB1,IRAK2,KAT2B,KDM4D,LACC1,MAP3K1,MEF2C,MRE11,NQO1,NTHL1,PAK1,PIK3CA,PILRB,PRKACA,PRKAR2A,PRKAR2B,PRKCQ,RAC1,RAD50,RALB,RELN,RHOA,RIPK1,RIPK2,SLC44A1,SOX9,TARBP2,TNFRSF10B,TNFRSF1A,TP53,ABL1,ADCY9,ADCYAP1,AKT1S1,APC,CACNB4,CAMK4,CCND1,CHRNA7,DRD2,EPHA6,FGF2,HGF,MAPKAPK2,NTF3,PPP3CA,PRKAA2,PRKCG,PRKN,PT…
GO:BP	regulation of response to stress	GO:0080134	4.56369e-12	11.3407	1354	219	50	21017	ADRA2A,APOE,ATG5,ATR,BCL2,BECN1,CASP6,CD47,DNMT3A,EP300,EPG5,GRN,IRAK2,KAT2A,KAT2B,KDM4D,KDM6A,LACC1,LAMP1,LAMP2,MDM2,MEF2C,NFE2L2,OPTN,PAK1,PCNA,PRDX1,PROS1,RAD9A,RIPK1,RIPK2,SESN1,SIN3A,SPP1,TARBP2,TNFRSF1A,TP53,ABL1,CLU,CNR1,DRD2,FGF2,HGF,MAPKAPK2,NAGLU,PPP3CA,PRKCG,PRKN,RASGRP1,TAF10
GO:BP	regulation of cellular component biogenesis	GO:0044087	4.6683e-12	11.3308	965	219	42	21017	APOE,ATG3,ATG5,ATR,BAG4,BDNF,BECN1,CD47,CLSTN1,COTL1,EHMT2,EP300,GSN,KAT2A,KAT2B,LAMP2,MEF2C,MSN,NLGN1,PAK1,PIK3CA,PRKACA,RAB7A,RAC1,RALB,RHOA,S100A10,SOX9,STMN1,TP53,VPS4A,ABL1,AMIGO1,APC,ARHGEF10,CLU,HAP1,NEGR1,PRKAA2,PRKN,SORL1,TENM2
GO:BP	cellular response to endogenous stimulus	GO:0071495	6.6797e-12	11.1752	1215	219	47	21017	ADRA2A,AKT2,BAG4,BDNF,BECN1,CSK,CYP7B1,DAB2,EP300,GRIA1,HDAC1,HSPB1,JUN,KAT2A,KAT2B,KDM6A,LGMN,MDM2,MEF2C,NFE2L2,NGFR,NRP2,PAK1,PIK3CA,PRKACA,PRKCQ,RHOA,RIPK1,SIN3A,SMC1A,SOX9,TET1,TP53,ABL1,AKT1S1,APAF1,APC,COL4A2,FGF2,HAP1,HGF,MAPKAPK2,NR4A2,NTF3,PPP3CA,PRKAA2,SORL1
GO:BP	neuron development	GO:0048666	7.67451e-12	11.1149	1170	219	46	21017	APOE,BCL2,BDNF,BECN1,DAB2,DLG4,EP300,GRN,HPRT1,KAT2B,MDM2,MEF2C,NFE2L2,NGFR,NLGN1,NPTX1,NRP2,PAK1,PRKCQ,RAB6B,RAC1,RELN,RHOA,SIN3A,SOD2,SPP1,STMN1,ABL1,ADCYAP1,AMIGO1,CHRNA7,CNR1,CNTN1,DRD2,EPHA6,HCN1,MMP2,NAGLU,NEGR1,NR4A2,NTF3,PPP3CA,PRKN,SLC12A5,TENM2,TSPO
GO:BP	regulation of intracellular signal transduction	GO:1902531	1.09731e-11	10.9597	1935	219	60	21017	ADRA2A,APOE,ATF3,ATR,BAG4,BCL2,BECN1,CSK,CYP7B1,DAB2,DUSP7,EP300,FABP5,GRM2,HDAC1,HSPB1,KDM6A,LAMP2,MDM2,MEF2C,MYORG,NFE2L2,NLGN1,OPTN,PAK1,PIK3CA,PRDX1,PRKACA,RAC1,RAD9A,RELN,RHOA,RIPK1,RIPK2,SESN1,SOD2,SOX9,STMN1,TARBP2,TNFRSF10B,TNFRSF1A,TP53,ABL1,ADCYAP1,AKT1S1,ARHGEF10,CHRNA7,CLU,DRD2,FGF2,HDAC7,HGF,ITPR1,MMP2,NTF3,PPP3CA,PRKAA2,PRKN,PTPRR,RASGRP1
GO:BP	macromolecule modification	GO:0043412	1.17472e-11	10.9301	3129	219	79	21017	ADRA2A,AKT2,APOE,ASB2,ATG3,ATG5,ATR,B3GNT5,BAG4,BCL2,BDNF,BMI1,CDKN1A,CSK,DAB2,DLG4,DUSP7,EHMT2,EP300,HDAC1,HSPB1,IRAK2,KAT2A,KAT2B,KDM4D,KDM6A,MAP3K1,MDM2,MRE11,NFE2L2,NQO1,NTHL1,PAK1,PIK3CA,PILRB,PRKACA,PRKAR2A,PRKAR2B,PRKCQ,RAC1,RAD50,RALB,RELN,RHOA,RIPK1,RIPK2,SOX9,ST3GAL6,TARBP2,TET1,TNFRSF10B,TNFRSF1A,TP53,TRIM47,TRPM4,MTO1,ABL1,ADCYAP1,AKT1S1,APC,CAMK4,CCND1,CHRNA7,DRD2,EPHA6,FGF2,HDAC7,HG…
GO:BP	cell migration	GO:0016477	1.40475e-11	10.8524	1499	219	52	21017	ABCC8,ADRA2A,AKT2,APOE,ASB2,BAG4,BCL2,CD47,CLIC4,CNN2,CYP7B1,DAB2,DOCK1,GRN,HDAC1,HSPB1,JAM2,LGMN,MDM2,MEF2C,MSN,NFE2L2,NGFR,NRP2,OSGIN1,PAK1,PIK3CA,PRKCQ,RAC1,RELN,RHOA,SIN3A,SOD2,SOX9,STMN1,TET1,TRPM4,ABL1,APC,DBH,DRD2,FGF2,HDAC7,HGF,ITGA7,MMP2,NR4A2,NTF3,PPP3CA,PTPRR,SORL1,TSPO
GO:BP	protein modification process	GO:0036211	1.61917e-11	10.7907	2947	219	76	21017	ADRA2A,AKT2,APOE,ASB2,ATG3,ATG5,ATR,B3GNT5,BAG4,BCL2,BDNF,BMI1,CDKN1A,CSK,DAB2,DLG4,DUSP7,EHMT2,EP300,HDAC1,HSPB1,IRAK2,KAT2A,KAT2B,KDM4D,KDM6A,MAP3K1,MDM2,MRE11,NFE2L2,NQO1,PAK1,PIK3CA,PILRB,PRKACA,PRKAR2A,PRKAR2B,PRKCQ,RAC1,RAD50,RALB,RELN,RHOA,RIPK1,RIPK2,SOX9,ST3GAL6,TARBP2,TET1,TNFRSF10B,TNFRSF1A,TP53,TRIM47,TRPM4,ABL1,ADCYAP1,AKT1S1,APC,CAMK4,CCND1,CHRNA7,DRD2,EPHA6,FGF2,HDAC7,HGF,MAPKAPK2,…
GO:BP	negative regulation of signal transduction	GO:0009968	1.88368e-11	10.725	1300	219	48	21017	APOE,ATF3,BCL2,BDNF,BMI1,CSK,CYP7B1,DAB2,DUSP7,HDAC1,HSPB1,KDM6A,LAMP2,LGMN,MDM2,NFE2L2,NGFR,OPTN,PRKACA,PRKCQ,RAB7A,RHOA,RIPK1,SESN1,SIN3A,SOD2,SOX9,STMN1,TARBP2,TET1,TMEM64,TP53,ABL1,AKT1S1,APC,CLU,DRD2,EGFL7,FGF2,HDAC7,HGF,ITPR1,NR4A2,PPP3CA,PRKAA2,PRKN,PTPRR,SORL1
GO:BP	positive regulation of protein metabolic process	GO:0051247	2.04726e-11	10.6888	1152	219	45	21017	ADRA2A,APOE,BAG4,BCL2,BDNF,BMI1,CDKN1A,DAB2,DLG4,GRIN2B,GRN,GSN,LGMN,MDM2,MRE11,MSN,NFE2L2,PAK1,PILRB,RAB7A,RAC1,RAD50,RALB,RELN,RHOA,RIPK1,RIPK2,S100A10,SOX9,TNFRSF10B,TNFRSF1A,TP53,ABL1,ADCYAP1,APC,CCND1,CHRNA7,CLU,FGF2,HGF,NTF3,PRKAA2,PRKN,RASGRP1,SORL1
GO:BP	cellular component organization or biogenesis	GO:0071840	2.14019e-11	10.6695	8323	219	143	21017	ABCC8,ADRA2A,AGO4,AKT2,APOE,ASB2,ATG3,ATG5,ATR,BAG3,BAG4,BCL2,BDNF,BECN1,BMI1,BNIP3,BNIP3L,CD47,CDKN1A,CLIC4,CLSTN1,CNN2,COA5,COTL1,CSK,DAB2,DLG4,DNMT3A,DOCK1,DOT1L,EHMT2,EP300,EPG5,GRIA1,GRIN2B,GRN,GSN,HDAC1,HPRT1,KAT2A,KAT2B,KDM4D,KDM5C,KDM6A,KMT2C,LAMP1,LAMP2,LGMN,MAFB,MCM6,MDM2,MEF2C,MRE11,MSN,NCAPH,NFE2L2,NGFR,NLGN1,NPTX1,NRP2,OPTN,OSGIN1,PAK1,PCNA,PEX14,PIK3CA,PILRB,PPFIA4,PRKACA,PRKCQ,RAB6…
GO:BP	positive regulation of phosphorus metabolic process	GO:0010562	3.39605e-11	10.469	667	219	34	21017	ADRA2A,BAG4,BCL2,BDNF,CDKN1A,DAB2,DLG4,KAT2B,MEF2C,MRE11,PAK1,PILRB,RAC1,RAD50,RALB,RELN,RHOA,RIPK1,RIPK2,SOX9,TNFRSF10B,TNFRSF1A,TP53,ABL1,ADCYAP1,CCND1,CHRNA7,FGF2,HGF,NTF3,PRKAA2,RASGRP1,TAZ,TF
GO:BP	positive regulation of phosphate metabolic process	GO:0045937	3.39605e-11	10.469	667	219	34	21017	ADRA2A,BAG4,BCL2,BDNF,CDKN1A,DAB2,DLG4,KAT2B,MEF2C,MRE11,PAK1,PILRB,RAC1,RAD50,RALB,RELN,RHOA,RIPK1,RIPK2,SOX9,TNFRSF10B,TNFRSF1A,TP53,ABL1,ADCYAP1,CCND1,CHRNA7,FGF2,HGF,NTF3,PRKAA2,RASGRP1,TAZ,TF
GO:BP	establishment of localization	GO:0051234	3.86976e-11	10.4123	4869	219	102	21017	ABCC8,ADRA2A,AKT2,APOE,ATG3,ATG5,ATR,BAG3,BAG4,BCL2,BECN1,BNIP3,BNIP3L,CD47,CDKN1A,CLIC4,CLSTN1,CNN2,COX5B,CSK,DAB2,DLG4,DOCK1,EP300,EPG5,FABP5,GRIA1,GRIA2,GRIN2B,GRM2,GRN,GSN,HSPB1,IGF2R,KAT2B,LAMP1,LAMP2,MDM2,MEF2C,MSN,NFE2L2,NGFR,NLGN1,NPTX1,OPTN,PAK1,PEX14,PIK3CA,PRKACA,RAB6B,RAB7A,RAC1,RALB,RELN,RIPK1,S100A10,SLC17A6,SLC44A1,SLC6A1,SPP1,SYP,TNFRSF1A,TP53,TPD52,TRPM4,TSPAN18,VPS4A,ABL1,ADCYAP…
GO:BP	cellular response to oxidative stress	GO:0034599	4.17089e-11	10.3798	250	219	22	21017	BECN1,BNIP3,JUN,KAT2B,MDM2,NFE2L2,NQO1,PCNA,PEX14,PRDX1,RIPK1,SIN3A,SOD2,TET1,TP53,ABL1,HGF,MMP2,NAGLU,NR4A2,PRKAA2,PRKN
GO:BP	positive regulation of transport	GO:0051050	4.21562e-11	10.3751	844	219	38	21017	ABCC8,ADRA2A,AKT2,APOE,ATG5,BAG3,CD47,DAB2,EP300,LAMP1,MDM2,MSN,NFE2L2,NLGN1,PRKACA,RAB7A,RELN,S100A10,SLC6A1,SPP1,TRPM4,VPS4A,ABL1,ADCYAP1,AMIGO1,CLU,CNTN1,DRD2,FGF12,HAP1,ITPR1,NTF3,PPP3CA,PRKN,RYR2,SORL1,TF,TSPO
GO:BP	negative regulation of cellular component organization	GO:0051129	5.24382e-11	10.2804	719	219	35	21017	APOE,ATG3,ATG5,BECN1,BNIP3,CD47,CNN2,CSK,DAB2,DLG4,EHMT2,EP300,GRIN2B,GSN,KAT2A,KAT2B,LAMP2,MDM2,NLGN1,PIK3CA,RAB7A,RAC1,RAD50,SOX9,SPP1,STMN1,TET1,TNFRSF1A,TP53,APC,CLU,HGF,PPP3CA,PRKN,SORL1
GO:BP	negative regulation of response to stimulus	GO:0048585	5.74667e-11	10.2406	1663	219	54	21017	ADRA2A,APOE,ATF3,ATG5,BCL2,BDNF,BMI1,CSK,CYP7B1,DAB2,DUSP7,GRN,HDAC1,HSPB1,KDM6A,LAMP2,LGMN,MDM2,NFE2L2,NGFR,OPTN,PRKACA,PRKCQ,PROS1,RAB7A,RHOA,RIPK1,SESN1,SIN3A,SOD2,SOX9,SPP1,STMN1,TARBP2,TET1,TMEM64,TNFRSF1A,TP53,ABL1,AKT1S1,APC,CLU,DRD2,EGFL7,FGF2,HDAC7,HGF,ITPR1,NR4A2,PPP3CA,PRKAA2,PRKN,PTPRR,SORL1
GO:BP	intrinsic apoptotic signaling pathway	GO:0097193	6.4125e-11	10.193	315	219	24	21017	BCL2,BECN1,BNIP3,CASP2,CASP6,CDKN1A,CRIP1,EP300,HDAC1,HSPB1,KDM6A,MDM2,NFE2L2,RAD9A,SOD2,TNFRSF10B,TNFRSF1A,TP53,ABL1,APAF1,CLU,ITPR1,MMP2,PRKN
GO:BP	cell projection organization	GO:0030030	6.93564e-11	10.1589	1615	219	53	21017	APOE,ATG3,ATG5,BAG4,BCL2,BDNF,DAB2,DLG4,EP300,GRIN2B,GRN,GSN,HPRT1,KAT2A,KAT2B,LGMN,MDM2,MEF2C,NFE2L2,NGFR,NLGN1,NPTX1,NRP2,PAK1,PIK3CA,PRKCQ,RAB6B,RAC1,RELN,RHOA,SIN3A,SPP1,STMN1,ABL1,ADCYAP1,AMIGO1,APC,CHRNA7,CNR1,CNTN1,DRD2,EPHA6,HAP1,MMP2,NEGR1,NES,NR4A2,NTF3,PPP3CA,PRKN,SLC12A5,TENM2,TSPO
GO:BP	enzyme-linked receptor protein signaling pathway	GO:0007167	9.66262e-11	10.0149	959	219	40	21017	ADRA2A,AKT2,BDNF,BECN1,CD8A,DAB2,EP300,HDAC1,HSPB1,IGF2R,JUN,LGMN,MYORG,NGFR,NRP2,PAK1,PIK3CA,PILRB,PRKCQ,RAB7A,RAC1,RALB,SIN3A,SOX9,STMN1,TET1,TP53,ABL1,AKT1S1,APC,COL4A2,EPHA6,FGF2,HAP1,HGF,MAPKAPK2,MMP2,NTF3,PTPRR,SORL1
GO:BP	neuron projection development	GO:0031175	1.24132e-10	9.90612	1014	219	41	21017	APOE,BCL2,BDNF,DAB2,DLG4,EP300,GRN,HPRT1,KAT2B,MDM2,MEF2C,NFE2L2,NGFR,NLGN1,NPTX1,NRP2,PAK1,PRKCQ,RAB6B,RAC1,RELN,RHOA,SIN3A,SPP1,STMN1,ABL1,ADCYAP1,AMIGO1,CHRNA7,CNR1,CNTN1,DRD2,EPHA6,MMP2,NEGR1,NR4A2,NTF3,PPP3CA,PRKN,SLC12A5,TSPO
GO:BP	regulation of transferase activity	GO:0051338	1.4323e-10	9.84397	539	219	30	21017	ADRA2A,APOE,BMI1,CDKN1A,DLG4,DUSP7,HSPB1,KAT2B,MRE11,PAK1,PCNA,PILRB,PRKAR2A,PRKAR2B,RAD50,RALB,RELN,RHOA,TARBP2,TNFRSF10B,ABL1,ADCYAP1,AKT1S1,APC,CCND1,CHRNA7,FGF2,NTF3,PRKN,RASGRP1
GO:BP	cell surface receptor protein tyrosine kinase signaling pathway	GO:0007169	1.48458e-10	9.8284	619	219	32	21017	ADRA2A,AKT2,BDNF,CD8A,HSPB1,IGF2R,LGMN,MYORG,NGFR,NRP2,PAK1,PIK3CA,PILRB,PRKCQ,RAB7A,RAC1,RALB,SOX9,STMN1,ABL1,AKT1S1,APC,COL4A2,EPHA6,FGF2,HAP1,HGF,MAPKAPK2,MMP2,NTF3,PTPRR,SORL1
GO:BP	protein metabolic process	GO:0019538	1.52423e-10	9.81695	4813	219	100	21017	ADRA2A,AGO4,AKT2,APOE,ASB2,ATG3,ATG5,ATR,B3GNT5,BAG3,BAG4,BCL2,BDNF,BMI1,BNIP3,BNIP3L,CASP2,CASP6,CDKN1A,CSK,DAB2,DLG4,DUSP7,EHMT2,EIF1,EP300,GRIN2B,GRN,GSN,HDAC1,HSPB1,IRAK2,KAT2A,KAT2B,KDM4D,KDM6A,LAMP2,LGMN,MAFB,MAP3K1,MDM2,MRE11,MSN,NFE2L2,NQO1,PAK1,PIK3CA,PILRB,PRKACA,PRKAR2A,PRKAR2B,PRKCQ,RAB7A,RAC1,RAD50,RALB,RELN,RHOA,RIPK1,RIPK2,RPL28,S100A10,SOX9,ST3GAL6,TARBP2,TET1,TNFRSF10B,TNFRSF1A,T…
GO:BP	regulation of macromolecule metabolic process	GO:0060255	1.79679e-10	9.7455	6535	219	121	21017	ABCC8,ADRA2A,AGO4,AKT2,APOE,ATF3,ATG5,ATR,BAG4,BCL2,BDNF,BMI1,CD47,CD83,CDKN1A,CKS1B,CNN2,CRIP1,CSK,DAB2,DLG4,DNMT3A,DOT1L,DUSP7,EHMT2,EIF1,EP300,EPCAM,GRIA1,GRIN2B,GRN,GSN,HDAC1,HSPB1,IRAK2,JUN,KAT2A,KAT2B,KDM4D,KDM5C,KDM6A,KMT2C,LACC1,LGMN,MAFB,MAFF,MCM6,MDM2,MEF2C,MRE11,MSN,NFE2L2,NGFR,NQO1,OPTN,PAK1,PCNA,PEX14,PIK3CA,PILRB,PRKACA,PRKAR2A,PRKAR2B,PRKCQ,PTMS,RAB7A,RAC1,RAD50,RALB,RELB,RELN,RHOA…
GO:BP	regulation of catabolic process	GO:0009894	2.07999e-10	9.68194	1030	219	41	21017	ADRA2A,AKT2,APOE,ATG5,BAG3,BCL2,BECN1,BNIP3,BNIP3L,DAB2,EHMT2,EP300,HSPB1,KAT2B,MDM2,MSN,NFE2L2,NQO1,OPTN,PIK3CA,PRKACA,RAB7A,RALB,RIPK2,SESN1,SOX9,TP53,ABL1,APAF1,APC,ATP6V0E1,CLU,CNR1,HGF,ITPR1,MAPKAPK2,PRKAA2,PRKCG,PRKN,SORL1,TSPO
GO:BP	cell population proliferation	GO:0008283	2.15409e-10	9.66674	2009	219	59	21017	ABCC8,ADRA2A,APOE,ATF3,BCL2,BECN1,BMI1,CD47,CDKN1A,CKS1B,CNN2,CSK,CYP7B1,DAB2,DOT1L,EPCAM,GRN,HDAC1,HPRT1,JUN,KAT2A,KAT2B,LGMN,MDM2,MEF2C,MRE11,MSN,NGFR,NRP2,OSGIN1,PAK1,PIK3CA,PRDX1,PRKCQ,RAD51B,RHOA,RIPK2,SOD2,SOX9,TP53,TRPM4,ABL1,APC,BCHE,CACNB4,CCND1,CHRNA7,CLU,DBH,DRD2,EGFL7,FGF2,HGF,MMP2,NES,NTF3,PPP3CA,RASGRP1,TSPO
GO:BP	positive regulation of cell communication	GO:0010647	2.59418e-10	9.586	1783	219	55	21017	ABCC8,ADRA2A,APOE,ATF3,ATR,BAG4,BDNF,BECN1,CASP2,CLSTN1,DAB2,DLG4,EP300,FABP5,GRIA1,GRIN2B,GRM2,LGMN,MEF2C,MYORG,NGFR,NLGN1,PAK1,PIK3CA,PRKACA,RAC1,RAD9A,RALB,RELN,RHOA,RIPK1,RIPK2,SOX9,SPP1,TNFRSF10B,TNFRSF1A,TP53,TRPM4,ABL1,ADCYAP1,APAF1,CALB2,CHRNA7,DRD2,FGF2,HAP1,HGF,ITPR1,MMP2,NTF3,PPP3CA,PRKCG,PRKN,RASGRP1,SORL1
GO:BP	positive regulation of signaling	GO:0023056	2.65447e-10	9.57602	1784	219	55	21017	ABCC8,ADRA2A,APOE,ATF3,ATR,BAG4,BDNF,BECN1,CASP2,CLSTN1,DAB2,DLG4,EP300,FABP5,GRIA1,GRIN2B,GRM2,LGMN,MEF2C,MYORG,NGFR,NLGN1,PAK1,PIK3CA,PRKACA,RAC1,RAD9A,RALB,RELN,RHOA,RIPK1,RIPK2,SOX9,SPP1,TNFRSF10B,TNFRSF1A,TP53,TRPM4,ABL1,ADCYAP1,APAF1,CALB2,CHRNA7,DRD2,FGF2,HAP1,HGF,ITPR1,MMP2,NTF3,PPP3CA,PRKCG,PRKN,RASGRP1,SORL1
GO:BP	plasma membrane bounded cell projection organization	GO:0120036	3.72608e-10	9.42875	1572	219	51	21017	APOE,ATG3,ATG5,BAG4,BCL2,BDNF,DAB2,DLG4,EP300,GRIN2B,GRN,GSN,HPRT1,KAT2B,LGMN,MDM2,MEF2C,NFE2L2,NGFR,NLGN1,NPTX1,NRP2,PAK1,PIK3CA,PRKCQ,RAB6B,RAC1,RELN,RHOA,SIN3A,SPP1,STMN1,ABL1,ADCYAP1,AMIGO1,APC,CHRNA7,CNR1,CNTN1,DRD2,EPHA6,HAP1,MMP2,NEGR1,NR4A2,NTF3,PPP3CA,PRKN,SLC12A5,TENM2,TSPO
GO:BP	intracellular monoatomic cation homeostasis	GO:0030003	3.86956e-10	9.41234	521	219	29	21017	APOE,ATG5,BCL2,BNIP3,CLIC4,GRIA1,GRN,LACC1,LAMP1,LAMP2,PRKACA,RAB7A,TMEM64,ABL1,ATP6V0E1,CACNA1C,CACNB4,CALB2,CHRNA7,CNR1,DRD2,FGF2,HAP1,ITPR1,NAGLU,RYR1,RYR2,SLC12A5,TF
GO:BP	localization	GO:0051179	4.11632e-10	9.38549	5521	219	108	21017	ABCC8,ADRA2A,AKT2,APOE,ATG3,ATG5,ATR,BAG3,BAG4,BCL2,BDNF,BECN1,BNIP3,BNIP3L,CD47,CDKN1A,CLIC4,CLSTN1,CNN2,COX5B,CSK,DAB2,DLG4,DOCK1,EP300,EPG5,FABP5,GRIA1,GRIA2,GRIN2B,GRM2,GRN,GSN,HSPB1,IGF2R,KAT2A,KAT2B,LAMP1,LAMP2,MDM2,MEF2C,MSN,NFE2L2,NGFR,NLGN1,NPTX1,OPTN,PAK1,PEX14,PIK3CA,PRKACA,RAB6B,RAB7A,RAC1,RALB,RELN,RIPK1,RPA1,S100A10,SIN3A,SLC17A6,SLC44A1,SLC6A1,SOX9,SPP1,SYP,TNFRSF1A,TP53,TPD52,TRPM…
GO:BP	intracellular monoatomic ion homeostasis	GO:0006873	5.94808e-10	9.22562	530	219	29	21017	APOE,ATG5,BCL2,BNIP3,CLIC4,GRIA1,GRN,LACC1,LAMP1,LAMP2,PRKACA,RAB7A,TMEM64,ABL1,ATP6V0E1,CACNA1C,CACNB4,CALB2,CHRNA7,CNR1,DRD2,FGF2,HAP1,ITPR1,NAGLU,RYR1,RYR2,SLC12A5,TF
GO:BP	memory	GO:0007613	6.56029e-10	9.18308	127	219	16	21017	ABCC8,APOE,BDNF,EHMT2,GRIA1,KAT2A,KAT2B,LGMN,RELN,SLC6A1,CAMK4,CHRNA7,CNR1,DBH,DRD2,NTF3
GO:BP	positive regulation of programmed cell death	GO:0043068	6.85099e-10	9.16425	533	219	29	21017	ATF3,BCL2,BECN1,BNIP3,BNIP3L,CASP2,CASP6,CDKN1A,GRN,GSN,IGF2R,JUN,MEF2C,NGFR,NQO1,RAD9A,RIPK1,RIPK2,SOD2,TNFRSF10B,TNFRSF1A,TP53,ABL1,APAF1,APC,CLU,CNR1,MMP2,TSPO
GO:BP	cell motility	GO:0048870	7.79478e-10	9.1082	1716	219	53	21017	ABCC8,ADRA2A,AKT2,APOE,ASB2,BAG4,BCL2,CD47,CLIC4,CNN2,CYP7B1,DAB2,DOCK1,GRN,HDAC1,HSPB1,JAM2,LGMN,MDM2,MEF2C,MSN,NFE2L2,NGFR,NRP2,OSGIN1,PAK1,PIK3CA,PRKCQ,RAC1,RELN,RHOA,SIN3A,SOD2,SOX9,STMN1,TET1,TRPM4,ABL1,APC,DBH,DRD2,FGF2,HDAC7,HGF,ITGA7,MMP2,NR4A2,NTF3,PPP3CA,PTPRR,SORL1,TF,TSPO
GO:BP	regulation of developmental process	GO:0050793	9.45615e-10	9.02429	2453	219	65	21017	ABCC8,AGO4,APOE,BCL2,BDNF,BNIP3,CD83,CDKN1A,CLSTN1,DAB2,DLG4,GRN,HDAC1,HSPB1,JAM2,KAT2A,KAT2B,LGMN,MAFB,MAFF,MDM2,MEF2C,MSN,NFE2L2,NGFR,NLGN1,PAK1,PIK3CA,PRKACA,RAC1,RELN,RHOA,RIPK1,RIPK2,S100A10,SIN3A,SOD2,SOX9,SPP1,TET1,TMEM64,TNFRSF1A,TP53,TRPM4,TSPAN18,ABL1,AMIGO1,APC,CAMK4,CCND1,CHRNA7,COL4A2,DRD2,FGF2,HAP1,HDAC7,HGF,ITGA7,NKX6-2,NTF3,PPP3CA,PRKN,RASGRP1,SORL1,TSPO
GO:BP	animal organ development	GO:0048513	9.68507e-10	9.0139	3047	219	74	21017	AGO4,AKT2,ASB2,ATF3,ATG5,BCL2,BMI1,BNIP3,CASP2,CDKN1A,CLIC4,CRIP1,CYP7B1,DAB2,EP300,EPCAM,GRIA1,GRIN2B,HDAC1,HPRT1,IGF2R,KAT2A,KAT2B,KDM6A,MAFB,MAFF,MDM2,MEF2C,MSN,MYORG,NGFR,NRP2,PCNA,PIK3CA,POLE,RELN,RHOA,SIN3A,SLC17A6,SOD2,SOX9,SPP1,STMN1,TNFRSF1A,TP53,TRPM4,ABL1,AMIGO1,APAF1,APC,CACNA1C,CACNB4,CCND1,CNTN1,DRD2,FGF12,FGF2,HAP1,HCN1,HGF,ITGA7,MAPKAPK2,MMP2,NAGLU,NES,NKX6-2,NR4A2,PPP3CA,RYR1,RYR…
GO:BP	regulation of membrane potential	GO:0042391	1.34725e-09	8.87055	433	219	26	21017	BCL2,BNIP3,BNIP3L,DLG4,GRIA1,GRIA2,GRIN2B,MEF2C,NLGN1,RELN,SOD2,TRPM4,ABL1,CACNA1C,CACNB4,CHRNA7,CNR1,DRD2,FGF12,GABRG2,GABRR1,HCN1,PPP3CA,PRKN,RYR2,TSPO
GO:BP	response to oxidative stress	GO:0006979	1.42343e-09	8.84666	398	219	25	21017	APOE,BCL2,BECN1,BNIP3,JUN,KAT2B,MDM2,NFE2L2,NQO1,PCNA,PEX14,PRDX1,RIPK1,SESN1,SIN3A,SOD2,TET1,TP53,ABL1,HGF,MMP2,NAGLU,NR4A2,PRKAA2,PRKN
GO:BP	cellular response to environmental stimulus	GO:0104004	1.77092e-09	8.7518	333	219	23	21017	AKT2,ATR,BAG3,BNIP3,CASP2,CDKN1A,CNN2,CRIP1,EP300,KDM4D,MAP3K1,MDM2,PCNA,PIK3CA,RAD9A,RELB,SOX9,TNFRSF10B,TNFRSF1A,TP53,FGF2,MMP2,TSPO
GO:BP	cellular response to abiotic stimulus	GO:0071214	1.77092e-09	8.7518	333	219	23	21017	AKT2,ATR,BAG3,BNIP3,CASP2,CDKN1A,CNN2,CRIP1,EP300,KDM4D,MAP3K1,MDM2,PCNA,PIK3CA,RAD9A,RELB,SOX9,TNFRSF10B,TNFRSF1A,TP53,FGF2,MMP2,TSPO
GO:BP	regulation of immune system process	GO:0002682	1.82149e-09	8.73957	1526	219	49	21017	APOE,ATG5,BCL2,BECN1,BMI1,CASP6,CD47,CD83,CD8A,CDKN1A,CNN2,CSK,EP300,EPG5,GRN,IRAK2,JAM2,KAT2A,LACC1,LAMP1,LAMP2,LGMN,MAFB,MAP3K1,MEF2C,MSN,NFE2L2,PAK1,PIK3CA,PRKCQ,RAC1,RHOA,RIPK1,RIPK2,SIN3A,SOX9,TARBP2,TMEM64,TRPM4,ABL1,CACNB4,CAMK4,CLU,CNR1,DRD2,MAPKAPK2,NAGLU,PPP3CA,RASGRP1
GO:BP	positive regulation of apoptotic process	GO:0043065	2.02488e-09	8.6936	517	219	28	21017	ATF3,BCL2,BECN1,BNIP3,BNIP3L,CASP2,CASP6,GRN,GSN,IGF2R,JUN,MEF2C,NGFR,NQO1,RAD9A,RIPK1,RIPK2,SOD2,TNFRSF10B,TNFRSF1A,TP53,ABL1,APAF1,APC,CLU,CNR1,MMP2,TSPO
GO:BP	cellular response to growth factor stimulus	GO:0071363	2.03645e-09	8.69113	682	219	32	21017	BAG4,BDNF,BECN1,DAB2,EP300,GRIA1,HDAC1,HSPB1,JUN,KAT2A,KDM6A,LGMN,MDM2,MEF2C,NGFR,NRP2,PIK3CA,RIPK1,SIN3A,SOX9,TET1,TP53,ABL1,AKT1S1,APAF1,COL4A2,FGF2,HAP1,HGF,MAPKAPK2,NTF3,SORL1
GO:BP	monoatomic cation homeostasis	GO:0055080	2.07301e-09	8.6834	598	219	30	21017	APOE,ATG5,BCL2,BNIP3,CLIC4,GRIA1,GRN,LACC1,LAMP1,LAMP2,PRKACA,RAB7A,SOD2,TMEM64,ABL1,ATP6V0E1,CACNA1C,CACNB4,CALB2,CHRNA7,CNR1,DRD2,FGF2,HAP1,ITPR1,NAGLU,RYR1,RYR2,SLC12A5,TF
GO:BP	macroautophagy	GO:0016236	2.41262e-09	8.61751	338	219	23	21017	ATG3,ATG5,BAG3,BECN1,BNIP3,BNIP3L,EHMT2,EPG5,LAMP2,OPTN,PIK3CA,PRKACA,RAB7A,RALB,RIPK2,SESN1,TP53,VPS4A,ATP6V0E1,PRKAA2,PRKN,TAZ,TSPO
GO:BP	regulation of vesicle-mediated transport	GO:0060627	2.43815e-09	8.61294	521	219	28	21017	ADRA2A,APOE,ATG3,ATG5,CD47,CNN2,CSK,DAB2,DLG4,LAMP1,MSN,NLGN1,RAB7A,RAC1,S100A10,SYP,VPS4A,ABL1,CACNB4,CLU,DRD2,HAP1,NTF3,PPP3CA,PRKCG,PRKN,SORL1,TF
GO:BP	monoatomic ion homeostasis	GO:0050801	3.15681e-09	8.50075	608	219	30	21017	APOE,ATG5,BCL2,BNIP3,CLIC4,GRIA1,GRN,LACC1,LAMP1,LAMP2,PRKACA,RAB7A,SOD2,TMEM64,ABL1,ATP6V0E1,CACNA1C,CACNB4,CALB2,CHRNA7,CNR1,DRD2,FGF2,HAP1,ITPR1,NAGLU,RYR1,RYR2,SLC12A5,TF
GO:BP	response to alkaloid	GO:0043279	3.53623e-09	8.45146	98	219	14	21017	CASP6,DNMT3A,EHMT2,GRIA1,GRM2,MDM2,NQO1,SLC6A1,BCHE,CNR1,DRD2,PRKCG,RYR1,RYR2
GO:BP	positive regulation of cell motility	GO:2000147	3.6262e-09	8.44055	570	219	29	21017	ADRA2A,AKT2,BAG4,BCL2,CD47,DAB2,DOCK1,GRN,HSPB1,JAM2,LGMN,MDM2,NFE2L2,NRP2,PAK1,RAC1,RELN,RHOA,SOD2,SOX9,ABL1,APC,FGF2,HDAC7,HGF,MMP2,NTF3,PPP3CA,TF
GO:BP	circulatory system development	GO:0072359	4.68987e-09	8.32884	1134	219	41	21017	ABCC8,APOE,ASB2,ATG5,CD47,CDKN1A,CLIC4,CRIP1,EP300,GRN,HSPB1,KAT2A,KAT2B,KDM6A,MDM2,MEF2C,NFE2L2,NGFR,NRP2,PCNA,PIK3CA,RHOA,SOD2,SOX9,TNFRSF1A,TP53,TSPAN18,ABL1,APC,CACNA1C,CHRNA7,COL4A2,EGFL7,FGF12,FGF2,HDAC7,MMP2,NAGLU,RYR1,RYR2,TAZ
GO:BP	cellular response to organic cyclic compound	GO:0071407	4.81816e-09	8.31712	536	219	28	21017	CASP6,CYP7B1,DAB2,DNMT3A,EHMT2,EP300,EPG5,GRIA1,HDAC1,KDM6A,MDM2,MEF2C,MSN,PAK1,RALB,RHOA,SIN3A,SPP1,TRPM4,ABL1,DRD2,GABRG2,HCN1,MMP2,NAGLU,PRKN,RYR1,RYR2
GO:BP	regulation of cell population proliferation	GO:0042127	4.8827e-09	8.31134	1682	219	51	21017	ABCC8,ADRA2A,APOE,ATF3,BCL2,BECN1,BMI1,CD47,CDKN1A,CNN2,CSK,CYP7B1,DAB2,DOT1L,EPCAM,GRN,HDAC1,JUN,KAT2B,LGMN,MDM2,MEF2C,NGFR,NRP2,OSGIN1,PAK1,PIK3CA,PRKCQ,RAD51B,RHOA,RIPK2,SOD2,SOX9,TP53,TRPM4,ABL1,APC,BCHE,CACNB4,CCND1,CHRNA7,CLU,DBH,DRD2,EGFL7,FGF2,MMP2,NES,NTF3,PPP3CA,TSPO
GO:BP	cell morphogenesis	GO:0000902	5.07524e-09	8.29454	986	219	38	21017	AGO4,APOE,BCL2,BDNF,CLIC4,DLG4,EP300,HPRT1,MEF2C,MSN,NGFR,NLGN1,NPTX1,NRP2,PAK1,PRKCQ,RAC1,RELN,RHOA,SIN3A,SPP1,STMN1,ABL1,ACTN1,AMIGO1,CHRNA7,CLU,CNTN1,DRD2,EPHA6,HGF,ITGA7,ITPR1,NES,NR4A2,NTF3,PPP3CA,PRKN
GO:BP	positive regulation of phosphorylation	GO:0042327	5.17049e-09	8.28647	620	219	30	21017	ADRA2A,BAG4,BCL2,BDNF,CDKN1A,DAB2,DLG4,MRE11,PAK1,PILRB,RAC1,RAD50,RALB,RELN,RHOA,RIPK1,RIPK2,SOX9,TNFRSF10B,TNFRSF1A,TP53,ABL1,ADCYAP1,CCND1,CHRNA7,FGF2,HGF,NTF3,RASGRP1,TF
GO:BP	positive regulation of cell migration	GO:0030335	6.28581e-09	8.20164	542	219	28	21017	ADRA2A,AKT2,BAG4,BCL2,CD47,DAB2,DOCK1,GRN,HSPB1,JAM2,LGMN,MDM2,NFE2L2,NRP2,PAK1,RAC1,RELN,RHOA,SOD2,SOX9,ABL1,APC,FGF2,HDAC7,HGF,MMP2,NTF3,PPP3CA
GO:BP	response to growth factor	GO:0070848	6.62296e-09	8.17895	713	219	32	21017	BAG4,BDNF,BECN1,DAB2,EP300,GRIA1,HDAC1,HSPB1,JUN,KAT2A,KDM6A,LGMN,MDM2,MEF2C,NGFR,NRP2,PIK3CA,RIPK1,SIN3A,SOX9,TET1,TP53,ABL1,AKT1S1,APAF1,COL4A2,FGF2,HAP1,HGF,MAPKAPK2,NTF3,SORL1
GO:BP	response to reactive oxygen species	GO:0000302	6.69412e-09	8.17431	199	219	18	21017	APOE,BCL2,BECN1,BNIP3,JUN,MDM2,NFE2L2,NQO1,PCNA,PEX14,PRDX1,RIPK1,SESN1,SOD2,TET1,ABL1,HGF,MMP2
GO:BP	catabolic process	GO:0009056	6.80913e-09	8.16691	2562	219	65	21017	ADRA2A,AGO4,AKT2,APOE,ASB2,ATG3,ATG5,BAG3,BCL2,BECN1,BNIP3,BNIP3L,DAB2,EHMT2,EP300,EPG5,HPRT1,HSPB1,KAT2B,LAMP2,LGMN,MDM2,MSN,NFE2L2,NQO1,NTHL1,OPTN,PIK3CA,PRDX1,PRKACA,RAB7A,RALB,RIPK1,RIPK2,SESN1,SLC44A1,SOX9,SPP1,TP53,VPS4A,ABL1,APAF1,APC,ATP6V0E1,BCHE,CLU,CNR1,CPT1B,DBH,DRD2,FGF2,GAD1,HAP1,HGF,ITPR1,MAPKAPK2,MMP2,NAGLU,PNKD,PRKAA2,PRKCG,PRKN,SORL1,TAZ,TSPO
GO:BP	positive regulation of locomotion	GO:0040017	6.86191e-09	8.16355	585	219	29	21017	ADRA2A,AKT2,BAG4,BCL2,CD47,DAB2,DOCK1,GRN,HSPB1,JAM2,LGMN,MDM2,NFE2L2,NRP2,PAK1,RAC1,RELN,RHOA,SOD2,SOX9,ABL1,APC,FGF2,HDAC7,HGF,MMP2,NTF3,PPP3CA,TF
GO:BP	regulation of macroautophagy	GO:0016241	7.1585e-09	8.14518	173	219	17	21017	ATG5,BAG3,BECN1,BNIP3,BNIP3L,EHMT2,OPTN,PIK3CA,PRKACA,RALB,RIPK2,SESN1,TP53,ATP6V0E1,PRKAA2,PRKN,TSPO
GO:BP	DNA damage response	GO:0006974	7.40139e-09	8.13069	901	219	36	21017	ATR,BCL2,CASP2,CDKN1A,CRIP1,DOT1L,EP300,KAT2A,KAT2B,KDM4D,LIG1,MCM6,MDM2,MRE11,NTHL1,PAK1,PCNA,POLE,RAD50,RAD51B,RAD51C,RAD9A,RPA1,SMC1A,SOD2,SUV39H1,TNFRSF1A,TP53,ABL1,APC,CCND1,CLU,MAPKAPK2,MUTYH,PRKCG,TAF10
GO:BP	regulation of autophagy	GO:0010506	7.8872e-09	8.10308	358	219	23	21017	ATG5,BAG3,BCL2,BECN1,BNIP3,BNIP3L,EHMT2,EP300,HSPB1,OPTN,PIK3CA,PRKACA,RALB,RIPK2,SESN1,TP53,ABL1,ATP6V0E1,HGF,ITPR1,PRKAA2,PRKN,TSPO
GO:BP	regulation of kinase activity	GO:0043549	8.24756e-09	8.08367	469	219	26	21017	ADRA2A,APOE,CDKN1A,DLG4,DUSP7,HSPB1,MRE11,PAK1,PILRB,PRKAR2A,PRKAR2B,RAD50,RALB,RELN,RHOA,TARBP2,TNFRSF10B,ABL1,ADCYAP1,AKT1S1,APC,CCND1,FGF2,NTF3,PRKN,RASGRP1
GO:BP	tissue development	GO:0009888	9.70846e-09	8.01285	2012	219	56	21017	AKT2,ASB2,ATF3,ATG5,BCL2,BMI1,CASP6,CDKN1A,CLIC4,CRIP1,CYP7B1,DAB2,EP300,EPCAM,FABP5,HDAC1,KAT2A,KDM6A,MAFB,MAFF,MDM2,MEF2C,MSN,MYORG,NGFR,NRP2,PAK1,PCNA,PIK3CA,PRKACA,RAD51B,RHOA,SOX9,SPP1,STMN1,TNFRSF1A,TP53,TRPM4,ABL1,APAF1,APC,CACNB4,CCND1,COL4A2,FGF2,HGF,ITGA7,MMP2,NAGLU,NKX6-2,PPP3CA,RYR1,RYR2,SORL1,TAF10,TAZ
GO:BP	positive regulation of protein phosphorylation	GO:0001934	1.03808e-08	7.98377	595	219	29	21017	ADRA2A,BAG4,BCL2,BDNF,CDKN1A,DAB2,DLG4,MRE11,PAK1,PILRB,RAC1,RAD50,RALB,RELN,RHOA,RIPK1,RIPK2,SOX9,TNFRSF10B,TNFRSF1A,TP53,ABL1,ADCYAP1,CCND1,CHRNA7,FGF2,HGF,NTF3,RASGRP1
GO:BP	response to xenobiotic stimulus	GO:0009410	1.05691e-08	7.97596	436	219	25	21017	ABCC8,ATG5,ATR,BCL2,BECN1,CDKN1A,DNMT3A,EHMT2,GRIA1,GRM2,MDM2,MEF2C,NFE2L2,NQO1,PCNA,SOD2,TP53,ABL1,BCHE,CCND1,DRD2,MMP2,PRKAA2,SLC12A5,TSPO
GO:BP	system process	GO:0003008	1.07408e-08	7.96896	2266	219	60	21017	ABCC8,ADRA2A,APOE,ASB2,ATG5,BCL2,BDNF,BECN1,DAB2,DLG4,EHMT2,EP300,FABP5,GRIA1,GRIN2B,GSN,JAM2,KAT2A,KAT2B,KDM6A,LGMN,MDM2,MEF2C,NLGN1,PIK3CA,PRKACA,PRKAR2B,RELN,RHOA,SLC44A1,SLC6A1,SOD2,SOX9,SPP1,TNFRSF1A,TRPM4,ABL1,BCHE,CACNA1C,CACNB4,CAMK4,CHRNA7,CNR1,DBH,DRD2,FGF12,HCN1,ITPR1,MMP2,NKX6-2,NTF3,PNKD,PPP3CA,PRKCG,PRKN,RYR1,RYR2,SLC12A5,TAZ,TSPO
GO:BP	negative regulation of intracellular signal transduction	GO:1902532	1.14643e-08	7.94065	640	219	30	21017	APOE,ATF3,BCL2,CSK,CYP7B1,DAB2,DUSP7,HDAC1,HSPB1,KDM6A,LAMP2,MDM2,NFE2L2,OPTN,PRKACA,RHOA,RIPK1,SESN1,SOD2,STMN1,TARBP2,ABL1,AKT1S1,CLU,DRD2,HDAC7,ITPR1,PRKAA2,PRKN,PTPRR
GO:BP	import into cell	GO:0098657	1.3891e-08	7.85727	921	219	36	21017	ABCC8,AKT2,APOE,ATG3,ATG5,BECN1,CD47,CNN2,CSK,DAB2,DLG4,DOCK1,GRIA1,GSN,IGF2R,NLGN1,PAK1,PIK3CA,RAB7A,RAC1,RALB,SLC6A1,SYP,TRPM4,ABL1,CACNA1C,CLU,DRD2,MAPKAPK2,NTF3,PPP3CA,PRKCG,PRKN,SLC12A5,SORL1,TF
GO:BP	response to hypoxia	GO:0001666	1.60667e-08	7.79407	302	219	21	21017	BCL2,BECN1,BNIP3,BNIP3L,DNMT3A,EP300,KDM6A,MDM2,NFE2L2,SOD2,SUV39H1,SUV39H2,TP53,APAF1,CHRNA7,DRD2,ITPR1,MMP2,NR4A2,RYR1,RYR2
GO:BP	synaptic transmission, glutamatergic	GO:0035249	2.29085e-08	7.64	112	219	14	21017	ABCC8,GRIA1,GRIA2,GRIN2B,GRM2,GRM3,MEF2C,NLGN1,RELN,SLC17A6,CACNB4,CNR1,DRD2,PRKN
GO:BP	positive regulation of protein modification process	GO:0031401	2.57895e-08	7.58856	751	219	32	21017	ADRA2A,BAG4,BCL2,BDNF,BMI1,CDKN1A,DAB2,DLG4,MRE11,PAK1,PILRB,RAC1,RAD50,RALB,RELN,RHOA,RIPK1,RIPK2,SOX9,TNFRSF10B,TNFRSF1A,TP53,ABL1,ADCYAP1,CCND1,CHRNA7,FGF2,HGF,NTF3,PRKAA2,PRKN,RASGRP1
GO:BP	positive regulation of catalytic activity	GO:0043085	2.6045e-08	7.58428	618	219	29	21017	ADRA2A,APOE,BMI1,CDKN1A,DLG4,GRIN2B,GRN,LGMN,MEF2C,MRE11,PAK1,PCNA,PILRB,RAD50,RALB,RELN,RHOA,RIPK2,S100A10,TNFRSF10B,ABL1,ADCYAP1,ARHGEF10,CACNA1C,CCND1,CHRNA7,FGF2,NTF3,RASGRP1
GO:BP	negative regulation of neuron apoptotic process	GO:0043524	2.65262e-08	7.57633	161	219	16	21017	APOE,BCL2,BDNF,GRN,LGMN,MEF2C,PIK3CA,RHOA,SOD2,CCND1,CLU,NES,NR4A2,NTF3,PRKCG,PRKN
GO:BP	regulation of apoptotic signaling pathway	GO:2001233	2.65744e-08	7.57554	380	219	23	21017	ATF3,BCL2,BDNF,BECN1,BMI1,CASP2,HDAC1,HSPB1,KDM6A,MDM2,NFE2L2,NGFR,RAD9A,RIPK1,SOD2,TP53,APAF1,CLU,DBH,HGF,MMP2,NR4A2,PRKN
GO:BP	response to oxygen levels	GO:0070482	2.7489e-08	7.56084	345	219	22	21017	BCL2,BECN1,BNIP3,BNIP3L,CDKN1A,DNMT3A,EP300,KDM6A,MDM2,NFE2L2,SOD2,SUV39H1,SUV39H2,TP53,APAF1,CHRNA7,DRD2,ITPR1,MMP2,NR4A2,RYR1,RYR2
GO:BP	regulation of secretion	GO:0051046	2.92718e-08	7.53355	621	219	29	21017	ABCC8,ADRA2A,APOE,ATG5,DAB2,GRM2,LAMP1,MEF2C,NLGN1,PRKACA,RAB7A,S100A10,SLC6A1,SPP1,SYP,TNFRSF1A,TRPM4,VPS4A,ADCYAP1,CACNB4,CNR1,DRD2,HAP1,ITPR1,PNKD,PPP3CA,PRKCG,PRKN,TSPO
GO:BP	response to biotic stimulus	GO:0009607	3.15006e-08	7.50168	1593	219	48	21017	ABCC8,APOE,ATG5,BCL2,BECN1,BNIP3,BNIP3L,CASP6,CD47,COTL1,EP300,EPG5,GRN,GSN,HSPB1,IFNAR2,IRAK2,LACC1,LAMP1,LAMP2,MEF2C,NFE2L2,NQO1,OPTN,PAK1,PRDX1,RAB7A,RELB,RHOA,RIPK2,SIN3A,SMC1A,SOD2,STMN1,TARBP2,TNFRSF10B,TNFRSF1A,TP53,ABL1,APAF1,CLU,CNR1,DRD2,MAPKAPK2,NAGLU,RASGRP1,TF,TSPO
GO:BP	cellular localization	GO:0051641	3.15054e-08	7.50161	3625	219	79	21017	ABCC8,ADRA2A,AKT2,APOE,ATG3,ATG5,ATR,BAG3,BAG4,BCL2,BDNF,BECN1,BNIP3L,CDKN1A,CLSTN1,CNN2,CSK,DAB2,DLG4,EP300,EPG5,GRN,GSN,HSPB1,IGF2R,KAT2B,LAMP1,LAMP2,MDM2,MEF2C,MSN,NGFR,NLGN1,NPTX1,OPTN,PAK1,PEX14,PIK3CA,PRKACA,RAB6B,RAB7A,RAC1,RELN,RPA1,S100A10,SIN3A,SLC17A6,SLC6A1,SOX9,SYP,TNFRSF1A,TP53,TRPM4,TSPAN18,VPS4A,ABL1,ADCYAP1,APC,CACNA1C,CACNB4,CLU,CNR1,CPT1B,DRD2,FGF2,HAP1,HCN1,ITPR1,NAGLU,PNKD,PP…
GO:BP	negative regulation of metabolic process	GO:0009892	3.56108e-08	7.44842	3418	219	76	21017	ADRA2A,AGO4,APOE,ATF3,ATG5,ATR,BAG4,BCL2,BECN1,BMI1,BNIP3,CD83,CDKN1A,CSK,DAB2,DNMT3A,DOT1L,DUSP7,EHMT2,EP300,GRN,HDAC1,HSPB1,JUN,KAT2A,KAT2B,KDM5C,LGMN,MAFB,MAFF,MDM2,MEF2C,NQO1,OPTN,PCNA,PEX14,PIK3CA,PRKACA,PRKAR2A,PRKAR2B,RAC1,RAD50,RELB,RHOA,RIPK1,SETDB1,SIN3A,SOX9,SUV39H1,SUV39H2,TARBP2,TET1,TP53,ABL1,AKT1S1,APC,CCND1,CHRNA7,CLU,CNR1,DRD2,FGF2,HAP1,HDAC7,HGF,MAPKAPK2,NKX6-2,NR4A2,NTF3,PPP3CA…
GO:BP	regulation of system process	GO:0044057	3.64123e-08	7.43875	542	219	27	21017	ABCC8,ADRA2A,APOE,BECN1,DAB2,DLG4,FABP5,GRIN2B,JAM2,MDM2,NLGN1,PRKACA,RELN,RHOA,SPP1,TNFRSF1A,TRPM4,ABL1,CACNA1C,CHRNA7,DBH,DRD2,FGF12,MMP2,PPP3CA,RYR2,TSPO
GO:BP	immune system process	GO:0002376	3.72111e-08	7.42933	2796	219	67	21017	APOE,ASB2,ATG5,BCL2,BECN1,BMI1,CASP6,CD47,CD83,CD8A,CDKN1A,CNN2,CRIP1,CSK,CYP7B1,EP300,EPG5,GRN,GSN,HPRT1,IFNAR2,IRAK2,JAM2,KAT2A,LACC1,LAMP1,LAMP2,LGMN,MAFB,MAP3K1,MEF2C,MSN,NFE2L2,NQO1,OPTN,PAK1,PIK3CA,PRDX1,PRKCQ,PTMS,RAC1,RELB,RHOA,RIPK1,RIPK2,SIN3A,SOX9,TARBP2,TMEM64,TP53,TPD52,TRPM4,ABL1,CACNA1C,CACNB4,CAMK4,CLU,CNR1,DBH,DRD2,ITGA7,MAPKAPK2,MMP2,NAGLU,PPP3CA,RASGRP1,TF
GO:BP	response to decreased oxygen levels	GO:0036293	3.78309e-08	7.42215	316	219	21	21017	BCL2,BECN1,BNIP3,BNIP3L,DNMT3A,EP300,KDM6A,MDM2,NFE2L2,SOD2,SUV39H1,SUV39H2,TP53,APAF1,CHRNA7,DRD2,ITPR1,MMP2,NR4A2,RYR1,RYR2
GO:BP	biological process involved in interspecies interaction between organisms	GO:0044419	4.26778e-08	7.3698	1724	219	50	21017	ABCC8,APOE,ATG5,BCL2,BECN1,BNIP3,BNIP3L,CASP6,CD47,COTL1,EP300,EPG5,GRN,GSN,HDAC1,HSPB1,IFNAR2,IGF2R,IRAK2,JUN,LACC1,LAMP1,LAMP2,MEF2C,NFE2L2,NQO1,OPTN,PAK1,PRDX1,RAB7A,RELB,RHOA,RIPK2,SIN3A,SOD2,STMN1,TARBP2,TNFRSF1A,TP53,VPS4A,ABL1,CLU,CNR1,DRD2,MAPKAPK2,NAGLU,PRKN,RASGRP1,TF,TSPO
GO:BP	positive regulation of transferase activity	GO:0051347	5.70845e-08	7.24348	323	219	21	21017	ADRA2A,APOE,BMI1,CDKN1A,DLG4,MRE11,PAK1,PCNA,PILRB,RAD50,RALB,RELN,RHOA,TNFRSF10B,ABL1,ADCYAP1,CCND1,CHRNA7,FGF2,NTF3,RASGRP1
GO:BP	positive regulation of biosynthetic process	GO:0009891	7.76108e-08	7.11008	2707	219	65	21017	ABCC8,ADRA2A,AKT2,APOE,ATF3,ATR,CD83,CNN2,DAB2,DOT1L,EIF1,EP300,EPCAM,GRIA1,GSN,HDAC1,HSPB1,JUN,KAT2A,KAT2B,KDM6A,KMT2C,LACC1,MAFB,MAFF,MDM2,MEF2C,MSN,NFE2L2,NGFR,PCNA,PRKACA,PRKCQ,PTMS,RELB,RIPK1,RIPK2,S100A10,SOD2,SOX9,SPP1,TET1,TNFRSF1A,TP53,ABL1,ACTN1,ADCYAP1,CAMK4,CLU,CNTN1,CRTC2,CXXC1,DRD2,FGF2,HGF,MAPKAPK2,NR4A2,PPP3CA,PRKN,RASGRP1,SORL1,TAF10,TAZ,TF,USP21
GO:BP	cell cycle	GO:0007049	9.66725e-08	7.0147	1824	219	51	21017	AGO4,AKT2,ATR,BCL2,BECN1,CABLES1,CASP2,CDKN1A,CKS1B,DOT1L,EHMT2,EP300,JUN,KAT2A,KAT2B,LGMN,LIG1,MCM6,MDM2,MRE11,NCAPH,PCNA,POLE,PRKACA,RAD50,RAD51B,RAD51C,RAD9A,RALB,RHOA,RPA1,SIN3A,SMC1A,SOX9,STMN1,SUV39H1,SUV39H2,TP53,VPS4A,ABL1,ADCYAP1,APC,ARHGEF10,CACNB4,CCND1,DRD2,FGF2,HGF,NES,PPP3CA,TAF10
GO:BP	cellular response to reactive oxygen species	GO:0034614	9.78395e-08	7.00949	149	219	15	21017	BECN1,BNIP3,JUN,MDM2,NFE2L2,NQO1,PCNA,PEX14,PRDX1,RIPK1,SOD2,TET1,ABL1,HGF,MMP2
GO:BP	regulation of secretion by cell	GO:1903530	1.01149e-07	6.99504	567	219	27	21017	ABCC8,ADRA2A,APOE,DAB2,GRM2,LAMP1,MEF2C,NLGN1,PRKACA,RAB7A,S100A10,SPP1,SYP,TNFRSF1A,TRPM4,VPS4A,ADCYAP1,CACNB4,CNR1,DRD2,HAP1,ITPR1,PNKD,PPP3CA,PRKCG,PRKN,TSPO
GO:BP	endocytosis	GO:0006897	1.20201e-07	6.92009	704	219	30	21017	APOE,ATG3,ATG5,BECN1,CD47,CNN2,CSK,DAB2,DLG4,DOCK1,GRIA1,GSN,IGF2R,NLGN1,PAK1,PIK3CA,RAB7A,RAC1,RALB,SYP,ABL1,CLU,DRD2,MAPKAPK2,NTF3,PPP3CA,PRKCG,PRKN,SORL1,TF
GO:BP	cell junction organization	GO:0034330	1.66213e-07	6.77934	760	219	31	21017	ABCC8,APOE,BCL2,BDNF,CLSTN1,CSK,DLG4,GRIA1,GRIN2B,LGMN,MEF2C,NLGN1,NPTX1,NRP2,PPFIA4,PRKACA,RAC1,RELN,RHOA,S100A10,SLC6A1,ABL1,ACTN1,AMIGO1,APC,CACNB4,CHRNA7,DRD2,GABRG2,HDAC7,NEGR1
GO:BP	positive regulation of cellular component biogenesis	GO:0044089	1.75447e-07	6.75585	497	219	25	21017	ATR,BAG4,BDNF,BECN1,CD47,CLSTN1,MSN,NLGN1,PAK1,PIK3CA,RAB7A,RAC1,RALB,RHOA,S100A10,SOX9,TP53,VPS4A,ABL1,AMIGO1,APC,ARHGEF10,CLU,HAP1,TENM2
GO:BP	positive regulation of cell population proliferation	GO:0008284	1.80892e-07	6.74258	958	219	35	21017	ADRA2A,ATF3,BCL2,BMI1,CD47,CDKN1A,CYP7B1,DOT1L,EPCAM,GRN,HDAC1,JUN,LGMN,MDM2,MEF2C,NGFR,NRP2,PAK1,PIK3CA,PRKCQ,RAD51B,RIPK2,SOX9,TRPM4,ABL1,CCND1,CHRNA7,DRD2,EGFL7,FGF2,MMP2,NES,NTF3,PPP3CA,TSPO
GO:BP	positive regulation of developmental process	GO:0051094	1.84555e-07	6.73387	1331	219	42	21017	APOE,BCL2,BDNF,BNIP3,CD83,CLSTN1,DAB2,DLG4,GRN,HDAC1,HSPB1,KAT2A,MDM2,MEF2C,NFE2L2,NGFR,NLGN1,RELN,RHOA,RIPK1,RIPK2,SIN3A,SOD2,SOX9,TET1,TMEM64,TNFRSF1A,TRPM4,ABL1,AMIGO1,CCND1,CHRNA7,DRD2,FGF2,HAP1,HGF,NKX6-2,PPP3CA,PRKN,RASGRP1,SORL1,TSPO
GO:BP	regulation of cell projection organization	GO:0031344	1.85606e-07	6.73141	671	219	29	21017	APOE,ATG3,ATG5,BDNF,DAB2,DLG4,EP300,GRIN2B,GRN,KAT2A,KAT2B,MDM2,NFE2L2,NLGN1,PAK1,PIK3CA,RAC1,RELN,RHOA,SPP1,ABL1,AMIGO1,APC,CNR1,CNTN1,HAP1,NEGR1,PPP3CA,TENM2
GO:BP	positive regulation of signal transduction	GO:0009967	2.15121e-07	6.66732	1566	219	46	21017	ADRA2A,APOE,ATF3,ATR,BAG4,BDNF,BECN1,CASP2,DAB2,DLG4,EP300,FABP5,GRIN2B,GRM2,MEF2C,MYORG,NGFR,NLGN1,PAK1,PIK3CA,RAC1,RAD9A,RALB,RELN,RHOA,RIPK1,RIPK2,SOX9,TNFRSF10B,TNFRSF1A,TP53,TRPM4,ABL1,ADCYAP1,APAF1,CHRNA7,DRD2,FGF2,HAP1,HGF,MMP2,NTF3,PPP3CA,PRKN,RASGRP1,SORL1
GO:BP	secretion	GO:0046903	2.39654e-07	6.62042	968	219	35	21017	ABCC8,ADRA2A,APOE,ATG5,DAB2,GRM2,LAMP1,MEF2C,NLGN1,PAK1,PRKACA,RAB7A,RALB,S100A10,SLC6A1,SPP1,SYP,TNFRSF1A,TPD52,TRPM4,TSPAN18,VPS4A,ADCYAP1,CACNB4,CCND1,CNR1,DRD2,HAP1,ITPR1,PNKD,PPP3CA,PRKCG,PRKN,RASGRP1,TSPO
GO:BP	positive regulation of gene expression	GO:0010628	3.18114e-07	6.49742	1189	219	39	21017	ABCC8,ADRA2A,ATF3,CD83,CNN2,EIF1,EP300,GRIA1,GSN,HDAC1,HSPB1,KAT2A,KAT2B,KDM6A,LACC1,MDM2,MEF2C,MSN,NFE2L2,PRKCQ,RIPK1,RIPK2,S100A10,SOX9,TET1,TP53,ABL1,ADCYAP1,CLU,CNTN1,DRD2,FGF2,HGF,MAPKAPK2,PPP3CA,PRKN,RASGRP1,SORL1,USP21
GO:BP	regulation of organelle organization	GO:0033043	3.50156e-07	6.45574	1139	219	38	21017	ATG3,ATG5,ATR,BAG4,BECN1,BNIP3,CD47,CLIC4,COTL1,EHMT2,EP300,GRN,GSN,KAT2A,KAT2B,MRE11,MSN,NCAPH,PAK1,PIK3CA,PRKCQ,RAB7A,RAC1,RAD50,RALB,RHOA,S100A10,STMN1,TP53,ABL1,APC,ARHGEF10,CLU,HAP1,HGF,NES,PRKAA2,PRKN
GO:BP	heart development	GO:0007507	3.58316e-07	6.44573	600	219	27	21017	ASB2,ATG5,CDKN1A,CRIP1,EP300,KAT2A,KAT2B,KDM6A,MDM2,MEF2C,NRP2,PCNA,RHOA,SOD2,SOX9,TNFRSF1A,TP53,ABL1,APC,CACNA1C,FGF12,FGF2,MMP2,NAGLU,RYR1,RYR2,TAZ
GO:BP	positive regulation of macromolecule biosynthetic process	GO:0010557	3.72662e-07	6.42869	2604	219	62	21017	ABCC8,ADRA2A,AKT2,APOE,ATF3,ATR,CD83,CNN2,DAB2,DOT1L,EIF1,EP300,EPCAM,GRIA1,GSN,HDAC1,HSPB1,JUN,KAT2A,KAT2B,KDM6A,KMT2C,LACC1,MAFB,MAFF,MDM2,MEF2C,MSN,NFE2L2,NGFR,PCNA,PRKCQ,PTMS,RELB,RIPK1,RIPK2,S100A10,SOX9,SPP1,TET1,TNFRSF1A,TP53,ABL1,ACTN1,ADCYAP1,CAMK4,CLU,CNTN1,CRTC2,CXXC1,DRD2,FGF2,HGF,MAPKAPK2,NR4A2,PPP3CA,PRKN,RASGRP1,SORL1,TAF10,TF,USP21
GO:BP	regulation of protein kinase activity	GO:0045859	4.51137e-07	6.34569	438	219	23	21017	ADRA2A,APOE,CDKN1A,DLG4,DUSP7,HSPB1,PAK1,PILRB,PRKAR2A,PRKAR2B,RALB,RELN,RHOA,TARBP2,TNFRSF10B,ABL1,ADCYAP1,AKT1S1,APC,CCND1,FGF2,NTF3,RASGRP1
GO:BP	vesicle-mediated transport	GO:0016192	4.92508e-07	6.30759	1547	219	45	21017	ADRA2A,APOE,ATG3,ATG5,BECN1,CD47,CLSTN1,CNN2,CSK,DAB2,DLG4,DOCK1,EPG5,GRIA1,GSN,IGF2R,LAMP1,MSN,NLGN1,OPTN,PAK1,PIK3CA,RAB6B,RAB7A,RAC1,RALB,S100A10,SLC17A6,SYP,TSPAN18,VPS4A,ABL1,CACNB4,CLU,DRD2,HAP1,MAPKAPK2,NAGLU,NTF3,PPP3CA,PRKCG,PRKN,RASGRP1,SORL1,TF
GO:BP	mitotic cell cycle process	GO:1903047	5.02023e-07	6.29928	747	219	30	21017	BCL2,BECN1,CASP2,CDKN1A,CKS1B,KAT2B,LIG1,MCM6,MDM2,MRE11,NCAPH,PCNA,POLE,RAD50,RAD51B,RAD51C,RAD9A,RHOA,SIN3A,SMC1A,STMN1,TP53,VPS4A,APC,ARHGEF10,CACNB4,CCND1,NES,PPP3CA,TAF10
GO:BP	positive regulation of nucleobase-containing compound metabolic process	GO:0045935	5.27898e-07	6.27745	2038	219	53	21017	APOE,ATF3,ATR,CDKN1A,DAB2,DOT1L,EIF1,EP300,EPCAM,HDAC1,JUN,KAT2A,KAT2B,KDM4D,KDM6A,KMT2C,MAFB,MAFF,MEF2C,MRE11,NFE2L2,NGFR,PCNA,PRKCQ,PTMS,RAD50,RELB,RIPK1,RIPK2,S100A10,SOX9,SPP1,TET1,TNFRSF1A,TP53,ABL1,ACTN1,ADCYAP1,CAMK4,CRTC2,CXXC1,DRD2,FGF2,HGF,NR4A2,PPP3CA,PRKAA2,PRKCG,PRKN,TAF10,TAZ,TF,USP21
GO:BP	regulation of immune response	GO:0050776	5.59366e-07	6.2523	897	219	33	21017	APOE,ATG5,BCL2,BECN1,CASP6,CD47,CD8A,CSK,EP300,EPG5,GRN,IRAK2,LACC1,LAMP1,LAMP2,MAP3K1,MEF2C,NFE2L2,PAK1,PIK3CA,PRKCQ,RIPK2,SIN3A,TARBP2,TRPM4,ABL1,CACNB4,CLU,CNR1,DRD2,MAPKAPK2,NAGLU,RASGRP1
GO:BP	mitotic cell cycle	GO:0000278	5.59366e-07	6.2523	897	219	33	21017	BCL2,BECN1,CASP2,CDKN1A,CKS1B,KAT2B,LGMN,LIG1,MCM6,MDM2,MRE11,NCAPH,PCNA,POLE,RAD50,RAD51B,RAD51C,RAD9A,RHOA,SIN3A,SMC1A,STMN1,TP53,VPS4A,ABL1,APC,ARHGEF10,CACNB4,CCND1,HGF,NES,PPP3CA,TAF10
GO:BP	response to other organism	GO:0051707	5.81421e-07	6.23551	1555	219	45	21017	ABCC8,APOE,ATG5,BCL2,BECN1,BNIP3,BNIP3L,CASP6,CD47,COTL1,EP300,EPG5,GRN,GSN,HSPB1,IFNAR2,IRAK2,LACC1,LAMP1,LAMP2,MEF2C,NFE2L2,NQO1,OPTN,PAK1,PRDX1,RAB7A,RELB,RHOA,RIPK2,SIN3A,SOD2,STMN1,TARBP2,TNFRSF1A,TP53,ABL1,CLU,CNR1,DRD2,MAPKAPK2,NAGLU,RASGRP1,TF,TSPO
GO:BP	response to external biotic stimulus	GO:0043207	6.18556e-07	6.20862	1558	219	45	21017	ABCC8,APOE,ATG5,BCL2,BECN1,BNIP3,BNIP3L,CASP6,CD47,COTL1,EP300,EPG5,GRN,GSN,HSPB1,IFNAR2,IRAK2,LACC1,LAMP1,LAMP2,MEF2C,NFE2L2,NQO1,OPTN,PAK1,PRDX1,RAB7A,RELB,RHOA,RIPK2,SIN3A,SOD2,STMN1,TARBP2,TNFRSF1A,TP53,ABL1,CLU,CNR1,DRD2,MAPKAPK2,NAGLU,RASGRP1,TF,TSPO
GO:BP	response to hormone	GO:0009725	6.44819e-07	6.19056	902	219	33	21017	ABCC8,ADRA2A,AKT2,BCL2,CDKN1A,CSK,CYP7B1,DAB2,EP300,GRIA1,HDAC1,KAT2B,KDM6A,MDM2,MEF2C,NFE2L2,NQO1,PAK1,PCNA,PIK3CA,PRKACA,PRKCQ,RHOA,SPP1,APC,BCHE,CCND1,MMP2,NR4A2,PPP3CA,PRKAA2,SORL1,TSPO
GO:BP	cellular response to metal ion	GO:0071248	6.96499e-07	6.15708	200	219	16	21017	BECN1,BNIP3,CLIC4,DLG4,JUN,LGMN,MEF2C,NFE2L2,NLGN1,NPTX1,NQO1,PRKAA2,PRKN,RYR1,TF,TSPO
GO:BP	reactive oxygen species metabolic process	GO:0072593	7.56581e-07	6.12114	232	219	17	21017	ATG5,BCL2,BECN1,BNIP3,CDKN1A,NFE2L2,NQO1,PRDX1,RAC1,RHOA,RIPK1,SESN1,SOD2,TP53,NAGLU,PRKN,TSPO
GO:BP	positive regulation of immune system process	GO:0002684	8.18412e-07	6.08703	1066	219	36	21017	BCL2,BECN1,BMI1,CASP6,CD47,CD83,CD8A,CDKN1A,CSK,EP300,EPG5,IRAK2,JAM2,LACC1,LAMP1,LAMP2,LGMN,MEF2C,PAK1,PIK3CA,PRKCQ,RAC1,RHOA,RIPK1,RIPK2,SIN3A,TARBP2,TMEM64,ABL1,CACNB4,CLU,CNR1,MAPKAPK2,NAGLU,PPP3CA,RASGRP1
GO:BP	epithelium development	GO:0060429	8.29926e-07	6.08096	1229	219	39	21017	AKT2,ASB2,BCL2,BMI1,CASP6,CDKN1A,CLIC4,CYP7B1,DAB2,EP300,EPCAM,HDAC1,KAT2A,KDM6A,MAFB,MAFF,MEF2C,MSN,NGFR,PAK1,PCNA,PRKACA,RAD51B,RHOA,SOX9,STMN1,TNFRSF1A,TP53,ABL1,APAF1,CCND1,FGF2,HGF,MMP2,NAGLU,NKX6-2,PPP3CA,RYR2,TAF10
GO:BP	intracellular calcium ion homeostasis	GO:0006874	9.09144e-07	6.04137	302	219	19	21017	APOE,ATG5,BCL2,BNIP3,GRIA1,PRKACA,TMEM64,ABL1,CACNA1C,CACNB4,CALB2,CHRNA7,CNR1,DRD2,FGF2,HAP1,ITPR1,RYR1,RYR2
GO:BP	response to lipid	GO:0033993	1.09624e-06	5.96009	921	219	33	21017	ABCC8,BCL2,CDKN1A,CYP7B1,DAB2,DNMT3A,EP300,GRIA1,HDAC1,IGF2R,IRAK2,KDM6A,MDM2,MEF2C,MSN,NQO1,PAK1,PCNA,PIK3CA,RHOA,RIPK2,SLC6A1,SOD2,SOX9,SPP1,ABL1,BCHE,CNR1,MAPKAPK2,MMP2,NAGLU,PRKAA2,TSPO
GO:BP	regulation of multicellular organismal development	GO:2000026	1.15296e-06	5.93818	1413	219	42	21017	ABCC8,BDNF,CD83,CLSTN1,GRN,HDAC1,HSPB1,JAM2,KAT2A,KAT2B,MAFB,MAFF,MEF2C,NFE2L2,NGFR,NLGN1,RELN,RHOA,RIPK1,RIPK2,S100A10,SOX9,SPP1,TMEM64,TNFRSF1A,TP53,TRPM4,TSPAN18,ABL1,AMIGO1,CAMK4,CCND1,CHRNA7,COL4A2,DRD2,FGF2,HAP1,NKX6-2,PPP3CA,RASGRP1,SORL1,TSPO
GO:BP	negative regulation of multicellular organismal process	GO:0051241	1.42193e-06	5.84712	1088	219	36	21017	ABCC8,ADRA2A,APOE,ATG5,BCL2,CD83,CSK,GRN,HDAC1,JAM2,LGMN,MAFB,MEF2C,NGFR,PROS1,RAC1,RELB,SIN3A,SOX9,SPP1,TET1,TNFRSF1A,TP53,TRPM4,CHRNA7,CNR1,COL4A2,DRD2,HDAC7,HGF,MMP2,NKX6-2,PPP3CA,PTPRR,SORL1,TSPO
GO:BP	secretion by cell	GO:0032940	1.52321e-06	5.81724	832	219	31	21017	ABCC8,ADRA2A,APOE,DAB2,GRM2,LAMP1,MEF2C,NLGN1,PAK1,PRKACA,RAB7A,RALB,S100A10,SPP1,SYP,TNFRSF1A,TRPM4,TSPAN18,VPS4A,ADCYAP1,CACNB4,CNR1,DRD2,HAP1,ITPR1,PNKD,PPP3CA,PRKCG,PRKN,RASGRP1,TSPO
GO:BP	regulation of nucleobase-containing compound metabolic process	GO:0019219	1.68318e-06	5.77387	4002	219	80	21017	APOE,ATF3,ATR,BAG4,BMI1,CDKN1A,CKS1B,DAB2,DNMT3A,DOT1L,EHMT2,EIF1,EP300,EPCAM,HDAC1,IRAK2,JUN,KAT2A,KAT2B,KDM4D,KDM5C,KDM6A,KMT2C,LACC1,MAFB,MAFF,MCM6,MDM2,MEF2C,MRE11,NFE2L2,NGFR,PCNA,PEX14,PRKACA,PRKCQ,PTMS,RAD50,RELB,RELN,RHOA,RIPK1,RIPK2,S100A10,SETDB1,SIN3A,SOD2,SOX9,SPP1,SUV39H1,SUV39H2,TET1,TNFRSF1A,TP53,ABL1,ACTN1,ADCYAP1,APAF1,CAMK4,CCND1,CLU,CRTC2,CXXC1,DRD2,FGF2,HDAC7,HGF,MAPKAPK2,NKX6…
GO:BP	regulation of cellular response to stress	GO:0080135	1.76823e-06	5.75246	512	219	24	21017	ATR,BCL2,DNMT3A,EP300,GRN,KAT2A,KAT2B,KDM4D,KDM6A,MDM2,NFE2L2,PCNA,PRDX1,RAD9A,RIPK2,SPP1,TP53,ABL1,CLU,DRD2,MAPKAPK2,PRKCG,PRKN,TAF10
GO:BP	cell activation	GO:0001775	1.81846e-06	5.7403	1098	219	36	21017	ADRA2A,APOE,ATG5,BCL2,BMI1,CD47,CD83,CD8A,CDKN1A,CSK,EP300,GRN,GSN,HPRT1,HSPB1,KAT2A,LAMP1,MAFB,MDM2,MEF2C,MSN,PIK3CA,PRDX1,PRKCQ,RELB,RHOA,RIPK2,TP53,TPD52,ABL1,CAMK4,CLU,CNR1,NAGLU,PPP3CA,RASGRP1
GO:BP	cellular response to nutrient levels	GO:0031669	1.86637e-06	5.729	246	219	17	21017	ATF3,ATG5,BCL2,BECN1,CDKN1A,EHMT2,EP300,KAT2B,KDM6A,LAMP2,MDM2,NFE2L2,RALB,SESN1,SUV39H1,TP53,PRKAA2
GO:BP	regulation of endocytosis	GO:0030100	2.11208e-06	5.67529	282	219	18	21017	APOE,ATG3,ATG5,CD47,CNN2,CSK,DAB2,DLG4,NLGN1,RAC1,ABL1,CLU,DRD2,NTF3,PPP3CA,PRKCG,PRKN,TF
GO:BP	positive regulation of cell projection organization	GO:0031346	2.36369e-06	5.62641	357	219	20	21017	APOE,BDNF,DLG4,EP300,GRN,KAT2A,KAT2B,NFE2L2,NLGN1,PIK3CA,RAC1,RELN,ABL1,AMIGO1,APC,CNR1,CNTN1,HAP1,NEGR1,TENM2
GO:BP	response to wounding	GO:0009611	2.43032e-06	5.61434	564	219	25	21017	ADRA2A,APOE,BCL2,BNIP3,CDKN1A,CNN2,GRN,HSPB1,NFE2L2,PAK1,PIK3CA,PRKCQ,PROS1,RAC1,RHOA,S100A10,SOD2,SPP1,VPS4A,DRD2,FGF2,MMP2,NAGLU,PPP3CA,TSPO
GO:BP	regulation of plasma membrane bounded cell projection organization	GO:0120035	2.44849e-06	5.6111	655	219	27	21017	APOE,ATG3,ATG5,BDNF,DAB2,EP300,GRIN2B,GRN,KAT2B,MDM2,NFE2L2,NLGN1,PAK1,PIK3CA,RAC1,RELN,RHOA,SPP1,ABL1,AMIGO1,APC,CNR1,CNTN1,HAP1,NEGR1,PPP3CA,TENM2
GO:BP	positive regulation of organelle organization	GO:0010638	2.77394e-06	5.5569	481	219	23	21017	ATR,BAG4,BECN1,BNIP3,CD47,GRN,GSN,MRE11,MSN,NCAPH,PAK1,PRKCQ,RAC1,RAD50,RALB,RHOA,S100A10,TP53,ABL1,ARHGEF10,HAP1,NES,PRKN
GO:BP	regulation of cell differentiation	GO:0045595	2.98234e-06	5.52544	1577	219	44	21017	ABCC8,BCL2,BDNF,CD83,DAB2,GRN,HDAC1,KAT2A,MAFB,MAFF,MDM2,MEF2C,NFE2L2,NLGN1,PRKACA,RELN,RHOA,RIPK1,RIPK2,S100A10,SIN3A,SOD2,SOX9,SPP1,TMEM64,TNFRSF1A,TP53,TRPM4,ABL1,AMIGO1,APC,CAMK4,CCND1,DRD2,FGF2,HAP1,HDAC7,HGF,NKX6-2,NTF3,PPP3CA,RASGRP1,SORL1,TSPO
GO:BP	regulation of transmembrane transport	GO:0034762	3.08506e-06	5.51074	442	219	22	21017	ADRA2A,AKT2,ATG5,BCL2,DLG4,FABP5,GRIN2B,MEF2C,NFE2L2,NLGN1,PRKACA,RELN,RIPK1,ABL1,AMIGO1,CACNA1C,CACNB4,DRD2,FGF12,HAP1,PPP3CA,RYR2
GO:BP	synapse organization	GO:0050808	3.25056e-06	5.48804	485	219	23	21017	APOE,BDNF,CLSTN1,DLG4,GRIA1,GRIN2B,LGMN,MEF2C,NLGN1,NPTX1,NRP2,PPFIA4,RELN,RHOA,SLC6A1,ABL1,ACTN1,AMIGO1,CACNB4,CHRNA7,DRD2,GABRG2,NEGR1
GO:BP	calcium ion homeostasis	GO:0055074	3.25992e-06	5.48679	326	219	19	21017	APOE,ATG5,BCL2,BNIP3,GRIA1,PRKACA,TMEM64,ABL1,CACNA1C,CACNB4,CALB2,CHRNA7,CNR1,DRD2,FGF2,HAP1,ITPR1,RYR1,RYR2
GO:BP	positive regulation of response to external stimulus	GO:0032103	3.43798e-06	5.4637	619	219	26	21017	BECN1,CASP6,CD47,EP300,EPG5,GRN,HSPB1,IRAK2,LACC1,LAMP1,LAMP2,LGMN,OPTN,PAK1,RAC1,RIPK1,RIPK2,SIN3A,TARBP2,TNFRSF1A,CNR1,FGF2,MAPKAPK2,NAGLU,NTF3,RASGRP1
GO:BP	inorganic ion homeostasis	GO:0098771	3.63915e-06	5.439	531	219	24	21017	APOE,ATG5,BCL2,BNIP3,GRIA1,PRKACA,SLC17A6,SOD2,TMEM64,ABL1,CACNA1C,CACNB4,CALB2,CHRNA7,CNR1,DRD2,FGF2,HAP1,ITPR1,NAGLU,RYR1,RYR2,SLC12A5,TF
GO:BP	negative regulation of macromolecule metabolic process	GO:0010605	4.67213e-06	5.33049	3197	219	68	21017	AGO4,APOE,ATF3,ATG5,ATR,BAG4,BMI1,CD83,CDKN1A,CSK,DAB2,DNMT3A,DOT1L,DUSP7,EHMT2,EP300,HDAC1,HSPB1,JUN,KAT2A,KAT2B,KDM5C,LGMN,MAFB,MAFF,MDM2,MEF2C,NQO1,OPTN,PCNA,PEX14,PIK3CA,PRKAR2A,PRKAR2B,RAC1,RAD50,RELB,RIPK1,SETDB1,SIN3A,SOX9,SUV39H1,SUV39H2,TARBP2,TET1,TP53,ABL1,AKT1S1,APC,CCND1,CHRNA7,CLU,DRD2,FGF2,HAP1,HDAC7,HGF,MAPKAPK2,NKX6-2,NR4A2,NTF3,PPP3CA,PRKAA2,PRKCG,PRKN,SORL1,TENM2,TSPO
GO:BP	cell projection morphogenesis	GO:0048858	4.67874e-06	5.32987	675	219	27	21017	APOE,BCL2,BDNF,DLG4,HPRT1,NGFR,NLGN1,NPTX1,NRP2,PAK1,PRKCQ,RAC1,RELN,SIN3A,SPP1,STMN1,ABL1,AMIGO1,CHRNA7,CNTN1,DRD2,EPHA6,NES,NR4A2,NTF3,PPP3CA,PRKN
GO:BP	negative regulation of transport	GO:0051051	4.86528e-06	5.31289	412	219	21	21017	ABCC8,ADRA2A,AKT2,APOE,ATG3,ATG5,BCL2,CD47,CNN2,CSK,DLG4,FABP5,RAB7A,RAC1,TNFRSF1A,CNR1,DRD2,PNKD,PPP3CA,PRKN,TSPO
GO:BP	rhythmic process	GO:0048511	5.64437e-06	5.24838	300	219	18	21017	CASP2,EP300,HDAC1,KAT2B,KDM5C,NGFR,NLGN1,PCNA,RELB,SIN3A,SUV39H1,SUV39H2,TP53,DRD2,MMP2,NAGLU,PRKAA2,PRKCG
GO:BP	chromatin remodeling	GO:0006338	5.83425e-06	5.23401	682	219	27	21017	ATR,BMI1,DNMT3A,DOT1L,EHMT2,EP300,HDAC1,KAT2A,KAT2B,KDM4D,KDM5C,KDM6A,KMT2C,PAK1,PIK3CA,SETD1B,SETDB1,SIN3A,SOX9,SUV39H1,SUV39H2,TET1,TP53,HDAC7,PRKAA2,TAF10,USP21
GO:BP	central nervous system development	GO:0007417	5.83524e-06	5.23394	1038	219	34	21017	B3GNT5,BCL2,BMI1,BNIP3,CSK,GRIA1,GRIN2B,GRN,GSN,HDAC1,HPRT1,KAT2A,MAFB,NGFR,NPTX1,NRP2,RELN,RHOA,SIN3A,SOX9,TP53,ABL1,AMIGO1,APAF1,CLU,CNTN1,DRD2,FGF2,HAP1,NAGLU,NES,NKX6-2,NR4A2,PRKN
GO:BP	cell morphogenesis involved in neuron differentiation	GO:0048667	7.19174e-06	5.14317	595	219	25	21017	APOE,BCL2,BDNF,DLG4,HPRT1,MEF2C,NGFR,NLGN1,NPTX1,NRP2,PAK1,PRKCQ,RAC1,RELN,SIN3A,SPP1,STMN1,ABL1,AMIGO1,CHRNA7,CNTN1,DRD2,EPHA6,NR4A2,PPP3CA
GO:BP	regulation of reactive oxygen species metabolic process	GO:2000377	7.569e-06	5.12096	144	219	13	21017	ATG5,BCL2,BECN1,BNIP3,CDKN1A,NFE2L2,RAC1,RHOA,RIPK1,SOD2,TP53,PRKN,TSPO
GO:BP	regulation of protein localization	GO:0032880	7.79083e-06	5.10842	891	219	31	21017	ABCC8,ADRA2A,AKT2,APOE,BAG3,BAG4,BCL2,BDNF,BNIP3L,CSK,DAB2,EP300,GSN,MDM2,MSN,NGFR,PIK3CA,PRKACA,SIN3A,TRPM4,VPS4A,ADCYAP1,APC,CACNB4,CNR1,DRD2,ITPR1,PPP3CA,PRKAA2,PRKN,SORL1
GO:BP	regulation of cellular localization	GO:0060341	7.95418e-06	5.0994	997	219	33	21017	ABCC8,ADRA2A,AKT2,APOE,BAG3,BAG4,BCL2,BDNF,BNIP3L,CSK,DAB2,EP300,GSN,LAMP1,MDM2,MSN,NGFR,PIK3CA,PRKACA,SIN3A,TRPM4,VPS4A,ADCYAP1,APC,CACNB4,CNR1,DRD2,HAP1,ITPR1,PPP3CA,PRKAA2,PRKN,SORL1
GO:BP	positive regulation of intracellular signal transduction	GO:1902533	8.44145e-06	5.07358	1108	219	35	21017	ADRA2A,APOE,ATR,BAG4,BECN1,DAB2,EP300,FABP5,GRM2,MEF2C,MYORG,NLGN1,PAK1,PIK3CA,RAC1,RAD9A,RELN,RHOA,RIPK1,RIPK2,SOX9,TNFRSF10B,TNFRSF1A,TP53,ABL1,ADCYAP1,CHRNA7,DRD2,FGF2,HGF,MMP2,NTF3,PPP3CA,PRKN,RASGRP1
GO:BP	leukocyte activation	GO:0045321	9.50554e-06	5.02202	951	219	32	21017	ATG5,BCL2,BMI1,CD47,CD83,CD8A,CDKN1A,CSK,EP300,GRN,GSN,HPRT1,KAT2A,LAMP1,MAFB,MEF2C,MSN,PIK3CA,PRDX1,PRKCQ,RELB,RHOA,RIPK2,TP53,TPD52,ABL1,CAMK4,CLU,CNR1,NAGLU,PPP3CA,RASGRP1
GO:BP	export from cell	GO:0140352	1.01248e-05	4.99461	901	219	31	21017	ABCC8,ADRA2A,APOE,DAB2,GRM2,LAMP1,MEF2C,NLGN1,PAK1,PRKACA,RAB7A,RALB,S100A10,SPP1,SYP,TNFRSF1A,TRPM4,TSPAN18,VPS4A,ADCYAP1,CACNB4,CNR1,DRD2,HAP1,ITPR1,PNKD,PPP3CA,PRKCG,PRKN,RASGRP1,TSPO
GO:BP	response to radiation	GO:0009314	1.03594e-05	4.98466	430	219	21	21017	ABCC8,AKT2,ATR,BCL2,CDKN1A,CRIP1,DNMT3A,EP300,KDM4D,MDM2,PCNA,RAD9A,SMC1A,SOD2,TP53,CACNB4,CCND1,CPT1B,DBH,DRD2,MMP2
GO:BP	positive regulation of synaptic transmission	GO:0050806	1.05439e-05	4.977	177	219	14	21017	APOE,CLSTN1,DLG4,GRIA1,GRIN2B,LGMN,NLGN1,RELN,ABL1,CALB2,CHRNA7,DRD2,HAP1,PRKCG
GO:BP	neuron projection morphogenesis	GO:0048812	1.07686e-05	4.96784	654	219	26	21017	APOE,BCL2,BDNF,DLG4,HPRT1,NGFR,NLGN1,NPTX1,NRP2,PAK1,PRKCQ,RAC1,RELN,SIN3A,SPP1,STMN1,ABL1,AMIGO1,CHRNA7,CNTN1,DRD2,EPHA6,NR4A2,NTF3,PPP3CA,PRKN
GO:BP	response to hydrogen peroxide	GO:0042542	1.11013e-05	4.95463	97	219	11	21017	BCL2,BECN1,BNIP3,MDM2,NFE2L2,NQO1,PCNA,RIPK1,SOD2,ABL1,MMP2
GO:BP	multicellular organismal response to stress	GO:0033555	1.11013e-05	4.95463	97	219	11	21017	ADRA2A,APOE,BCL2,MEF2C,RELN,DBH,HCN1,NR4A2,PPP3CA,PRKCG,TSPO
GO:BP	response to toxic substance	GO:0009636	1.11672e-05	4.95206	242	219	16	21017	APOE,BCL2,CDKN1A,DNMT3A,EHMT2,GRIA1,MDM2,NFE2L2,NQO1,PRDX1,SESN1,SLC6A1,SOD2,DRD2,PRKCG,PRKN
GO:BP	anatomical structure formation involved in morphogenesis	GO:0048646	1.24831e-05	4.90368	1181	219	36	21017	ABCC8,CD47,CLIC4,DOCK1,EP300,GRN,HDAC1,HSPB1,JAM2,KAT2A,KDM6A,MAFB,MEF2C,NFE2L2,NGFR,NRP2,PIK3CA,PRKACA,RELN,RHOA,SOX9,TET1,TP53,TSPAN18,ABL1,ACTN1,APAF1,CHRNA7,CNTN1,COL4A2,EGFL7,FGF2,HDAC7,ITGA7,MMP2,TAF10
GO:BP	positive regulation of kinase activity	GO:0033674	1.2555e-05	4.90118	279	219	17	21017	ADRA2A,CDKN1A,DLG4,MRE11,PAK1,PILRB,RAD50,RALB,RELN,RHOA,TNFRSF10B,ABL1,ADCYAP1,CCND1,FGF2,NTF3,RASGRP1
GO:BP	monoatomic ion transmembrane transport	GO:0034220	1.29445e-05	4.88792	1017	219	33	21017	ABCC8,ADRA2A,ATG5,BCL2,CLIC4,COX5B,GRIA1,GRIA2,GRIN2B,PRKACA,RELN,RIPK1,SLC17A6,SLC6A1,TRPM4,ABL1,AMIGO1,ATP6V0E1,CACNA1C,CACNB4,CHRNA7,DRD2,FGF12,FGF2,GABRG2,GABRR1,HAP1,HCN1,ITPR1,PPP3CA,RYR1,RYR2,SLC12A5
GO:BP	organelle organization	GO:0006996	1.29474e-05	4.88782	3570	219	72	21017	ADRA2A,AGO4,APOE,ASB2,ATG3,ATG5,ATR,BAG3,BAG4,BCL2,BECN1,BNIP3,BNIP3L,CD47,CLIC4,CNN2,COA5,COTL1,DLG4,DOT1L,EHMT2,EP300,GRN,GSN,KAT2A,KAT2B,LAMP1,LAMP2,MCM6,MRE11,MSN,NCAPH,NLGN1,NPTX1,OPTN,PAK1,PCNA,PEX14,PIK3CA,PRKCQ,RAB6B,RAB7A,RAC1,RAD50,RAD51B,RAD51C,RALB,RELN,RHOA,RPA1,S100A10,SMC1A,SOD2,SOX9,STMN1,SUV39H1,SYP,TP53,VPS4A,ABL1,ACTN1,APC,ARHGEF10,CLU,HAP1,HGF,NAGLU,NES,PRKAA2,PRKN,TAZ,TF
GO:BP	transmembrane transport	GO:0055085	1.42307e-05	4.84677	1538	219	42	21017	ABCC8,ADRA2A,AKT2,ATG5,BCL2,CLIC4,COX5B,DLG4,FABP5,GRIA1,GRIA2,GRIN2B,MEF2C,NFE2L2,NLGN1,PEX14,PRKACA,RELN,RIPK1,SLC17A6,SLC44A1,SLC6A1,TRPM4,ABL1,AMIGO1,ATP6V0E1,CACNA1C,CACNB4,CHRNA7,CPT1B,DRD2,FGF12,FGF2,GABRG2,GABRR1,HAP1,HCN1,ITPR1,PPP3CA,RYR1,RYR2,SLC12A5
GO:BP	establishment of localization in cell	GO:0051649	1.43941e-05	4.84182	1976	219	49	21017	ABCC8,ADRA2A,APOE,ATG5,BAG3,BCL2,BECN1,CDKN1A,CNN2,DAB2,EP300,EPG5,GRN,HSPB1,IGF2R,KAT2B,LAMP1,LAMP2,MDM2,MEF2C,MSN,NGFR,NLGN1,PEX14,PRKACA,RAB6B,RAB7A,SLC17A6,SLC6A1,SYP,TP53,TRPM4,TSPAN18,VPS4A,ABL1,APC,CACNB4,CLU,CPT1B,DRD2,HAP1,NAGLU,PNKD,PPP3CA,PRKCG,PRKN,RASGRP1,RYR2,SORL1
GO:BP	axon development	GO:0061564	1.50892e-05	4.82133	526	219	23	21017	APOE,BCL2,BDNF,GRN,NGFR,NPTX1,NRP2,PAK1,PRKCQ,RAC1,RELN,SIN3A,SPP1,STMN1,ABL1,AMIGO1,CNR1,CNTN1,DRD2,EPHA6,MMP2,NR4A2,TSPO
GO:BP	locomotory behavior	GO:0007626	1.54483e-05	4.81112	214	219	15	21017	APOE,DLG4,HPRT1,RELN,SOD2,CACNB4,CNTN1,DBH,DRD2,FGF12,GAD1,NAGLU,NEGR1,NR4A2,PRKN
GO:BP	positive regulation of defense response	GO:0031349	1.62414e-05	4.78938	484	219	22	21017	BECN1,CASP6,CD47,EP300,EPG5,GRN,IRAK2,LACC1,LAMP1,LAMP2,MEF2C,OPTN,PAK1,RIPK1,RIPK2,SIN3A,TARBP2,TNFRSF1A,CNR1,MAPKAPK2,NAGLU,RASGRP1
GO:BP	regulation of synaptic plasticity	GO:0048167	1.75224e-05	4.75641	216	219	15	21017	APOE,DLG4,GRIA1,GRIN2B,GRM2,KAT2A,LGMN,MEF2C,RELN,SYP,ABL1,CALB2,CHRNA7,DRD2,PRKCG
GO:BP	plasma membrane bounded cell projection morphogenesis	GO:0120039	1.76751e-05	4.75264	670	219	26	21017	APOE,BCL2,BDNF,DLG4,HPRT1,NGFR,NLGN1,NPTX1,NRP2,PAK1,PRKCQ,RAC1,RELN,SIN3A,SPP1,STMN1,ABL1,AMIGO1,CHRNA7,CNTN1,DRD2,EPHA6,NR4A2,NTF3,PPP3CA,PRKN
GO:BP	monoatomic ion transport	GO:0006811	1.84257e-05	4.73458	1256	219	37	21017	ABCC8,ADRA2A,ATG5,BCL2,CLIC4,COX5B,GRIA1,GRIA2,GRIN2B,PRKACA,RELN,RIPK1,SLC17A6,SLC6A1,TRPM4,ABL1,AMIGO1,ATP6V0E1,CACNA1C,CACNB4,CHRNA7,CNR1,CNTN1,DRD2,FGF12,FGF2,GABRG2,GABRR1,HAP1,HCN1,ITPR1,PPP3CA,RYR1,RYR2,SLC12A5,TF,TSPO
GO:BP	tube morphogenesis	GO:0035239	1.84305e-05	4.73446	872	219	30	21017	ABCC8,APOE,ASB2,BCL2,CD47,CLIC4,GRN,HSPB1,KAT2A,KDM6A,MEF2C,NFE2L2,NGFR,NRP2,PAK1,PIK3CA,PRKACA,RHOA,SOX9,TSPAN18,ABL1,APAF1,CHRNA7,COL4A2,EGFL7,FGF2,HDAC7,MMP2,NAGLU,RYR2
GO:BP	positive regulation of macroautophagy	GO:0016239	1.89131e-05	4.72324	79	219	10	21017	BAG3,BECN1,BNIP3,BNIP3L,OPTN,RALB,RIPK2,SESN1,PRKAA2,PRKN
GO:BP	regulation of cytosolic calcium ion concentration	GO:0051480	1.96558e-05	4.70651	59	219	9	21017	GRIA1,PRKACA,TMEM64,CACNB4,CALB2,CNR1,ITPR1,RYR1,RYR2
GO:BP	response to mechanical stimulus	GO:0009612	1.98477e-05	4.70229	218	219	15	21017	ATR,BAG3,BNIP3,CASP2,CNN2,GSN,MAP3K1,PIK3CA,SOX9,TNFRSF10B,TNFRSF1A,DRD2,FGF2,MMP2,RYR2
GO:BP	tube development	GO:0035295	2.07552e-05	4.68287	1092	219	34	21017	ABCC8,APOE,ASB2,BCL2,BMI1,CD47,CDKN1A,CLIC4,EP300,EPCAM,GRN,HSPB1,KAT2A,KDM6A,MEF2C,NFE2L2,NGFR,NRP2,PAK1,PIK3CA,PRKACA,RHOA,SOX9,TSPAN18,ABL1,APAF1,CHRNA7,COL4A2,EGFL7,FGF2,HDAC7,MMP2,NAGLU,RYR2
GO:BP	defense response	GO:0006952	2.16788e-05	4.66396	1809	219	46	21017	APOE,ATG5,BCL2,BECN1,BNIP3,BNIP3L,CASP6,CD47,CD83,COTL1,EP300,EPG5,GRN,GSN,IFNAR2,IRAK2,KDM4D,LACC1,LAMP1,LAMP2,MEF2C,NFE2L2,NQO1,OPTN,PAK1,PRDX1,PRKCQ,RAC1,RELB,RIPK1,RIPK2,SIN3A,TARBP2,TNFRSF10B,TNFRSF1A,TP53,TSPAN18,CAMK4,CLU,CNR1,DRD2,HGF,MAPKAPK2,NAGLU,RASGRP1,TF
GO:BP	regulation of monoatomic ion transport	GO:0043269	2.20597e-05	4.6564	449	219	21	21017	ABCC8,ADRA2A,ATG5,BCL2,GRIN2B,PRKACA,RELN,RIPK1,ABL1,AMIGO1,CACNA1C,CACNB4,CNR1,CNTN1,DRD2,FGF12,HAP1,PPP3CA,RYR2,TF,TSPO
GO:BP	positive regulation of catabolic process	GO:0009896	2.21968e-05	4.65371	537	219	23	21017	ADRA2A,AKT2,APOE,BAG3,BECN1,BNIP3,BNIP3L,DAB2,KAT2B,MDM2,MSN,NFE2L2,OPTN,RAB7A,RALB,RIPK2,SESN1,SOX9,APC,CLU,PRKAA2,PRKN,SORL1
GO:BP	positive regulation of neuron projection development	GO:0010976	2.34083e-05	4.63063	158	219	13	21017	APOE,BDNF,EP300,GRN,KAT2B,NFE2L2,NLGN1,RELN,ABL1,AMIGO1,CNR1,CNTN1,NEGR1
GO:BP	regulation of gene expression	GO:0010468	2.3703e-05	4.6252	5515	219	96	21017	ABCC8,ADRA2A,AGO4,AKT2,APOE,ATF3,ATG5,BCL2,BMI1,CD47,CD83,CDKN1A,CKS1B,CNN2,CRIP1,CSK,DAB2,DNMT3A,DOT1L,EHMT2,EIF1,EP300,EPCAM,GRIA1,GSN,HDAC1,HSPB1,IRAK2,JUN,KAT2A,KAT2B,KDM4D,KDM5C,KDM6A,KMT2C,LACC1,LGMN,MAFB,MAFF,MDM2,MEF2C,MSN,NFE2L2,NGFR,PCNA,PEX14,PIK3CA,PRKACA,PRKCQ,PTMS,RAC1,RELB,RELN,RHOA,RIPK1,RIPK2,S100A10,SETDB1,SIN3A,SOD2,SOX9,SPP1,SUV39H1,SUV39H2,TARBP2,TET1,TNFRSF1A,TP53,TRPM4,ABL1…
GO:BP	gland development	GO:0048732	2.67347e-05	4.57292	454	219	21	21017	AKT2,BCL2,CRIP1,CYP7B1,IGF2R,MAFB,MSN,PCNA,PIK3CA,SOD2,SOX9,ABL1,CACNB4,CCND1,DRD2,FGF2,HGF,MMP2,NAGLU,TAF10,TSPO
GO:BP	regulation of cell cycle	GO:0051726	2.71857e-05	4.56566	1104	219	34	21017	AKT2,ATR,BCL2,BECN1,CABLES1,CASP2,CDKN1A,CKS1B,DOT1L,JUN,KAT2A,KAT2B,LGMN,MDM2,MRE11,NCAPH,PRKACA,RAD50,RAD51B,RAD51C,RAD9A,RHOA,SIN3A,SOX9,SUV39H1,TP53,VPS4A,ABL1,ADCYAP1,APC,CACNB4,CCND1,DRD2,FGF2
GO:BP	intrinsic apoptotic signaling pathway in response to DNA damage	GO:0008630	2.85867e-05	4.54384	106	219	11	21017	BCL2,CASP2,CDKN1A,CRIP1,EP300,RAD9A,SOD2,TNFRSF1A,TP53,ABL1,CLU
GO:BP	lymphocyte activation	GO:0046649	2.96281e-05	4.5283	787	219	28	21017	ATG5,BCL2,BMI1,CD47,CD83,CD8A,CDKN1A,CSK,EP300,GSN,HPRT1,KAT2A,LAMP1,MAFB,MEF2C,MSN,PIK3CA,PRDX1,PRKCQ,RELB,RHOA,RIPK2,TP53,TPD52,ABL1,CAMK4,PPP3CA,RASGRP1
GO:BP	cell cycle process	GO:0022402	3.02846e-05	4.51878	1280	219	37	21017	AGO4,ATR,BCL2,BECN1,CASP2,CDKN1A,CKS1B,DOT1L,EHMT2,KAT2A,KAT2B,LIG1,MCM6,MDM2,MRE11,NCAPH,PCNA,POLE,RAD50,RAD51B,RAD51C,RAD9A,RHOA,SIN3A,SMC1A,SOX9,STMN1,TP53,VPS4A,APC,ARHGEF10,CACNB4,CCND1,DRD2,NES,PPP3CA,TAF10
GO:BP	circulatory system process	GO:0003013	3.10075e-05	4.50853	593	219	24	21017	ABCC8,ADRA2A,APOE,ATG5,FABP5,GSN,KAT2B,MDM2,PIK3CA,PRKACA,RHOA,SLC44A1,SLC6A1,SOD2,TRPM4,ABL1,CACNA1C,CNR1,DBH,DRD2,FGF12,MMP2,RYR2,TAZ
GO:BP	regulation of biosynthetic process	GO:0009889	3.1586e-05	4.50051	5795	219	99	21017	ABCC8,ADRA2A,AGO4,AKT2,APOE,ATF3,ATG5,ATR,BCL2,BMI1,CD47,CD83,CDKN1A,CKS1B,CNN2,CRIP1,CSK,DAB2,DNMT3A,DOT1L,EHMT2,EIF1,EP300,EPCAM,FABP5,GRIA1,GSN,HDAC1,HSPB1,IRAK2,JUN,KAT2A,KAT2B,KDM4D,KDM5C,KDM6A,KMT2C,LACC1,LGMN,MAFB,MAFF,MDM2,MEF2C,MSN,NFE2L2,NGFR,PCNA,PEX14,PIK3CA,PRKACA,PRKCQ,PTMS,RAC1,RELB,RELN,RHOA,RIPK1,RIPK2,S100A10,SETDB1,SIN3A,SOD2,SOX9,SPP1,SUV39H1,SUV39H2,TARBP2,TET1,TNFRSF1A,TP53,…
GO:BP	maintenance of location in cell	GO:0051651	3.2242e-05	4.49158	226	219	15	21017	APOE,ATG5,GSN,PRKACA,ABL1,CACNA1C,DRD2,FGF2,HAP1,ITPR1,NAGLU,RYR1,RYR2,SORL1,TSPO
GO:BP	regulation of macromolecule biosynthetic process	GO:0010556	3.32381e-05	4.47836	5633	219	97	21017	ABCC8,ADRA2A,AGO4,AKT2,APOE,ATF3,ATG5,ATR,BCL2,BMI1,CD47,CD83,CDKN1A,CKS1B,CNN2,CRIP1,CSK,DAB2,DNMT3A,DOT1L,EHMT2,EIF1,EP300,EPCAM,GRIA1,GSN,HDAC1,HSPB1,IRAK2,JUN,KAT2A,KAT2B,KDM4D,KDM5C,KDM6A,KMT2C,LACC1,LGMN,MAFB,MAFF,MDM2,MEF2C,MSN,NFE2L2,NGFR,PCNA,PEX14,PIK3CA,PRKACA,PRKCQ,PTMS,RAC1,RELB,RELN,RHOA,RIPK1,RIPK2,S100A10,SETDB1,SIN3A,SOD2,SOX9,SPP1,SUV39H1,SUV39H2,TARBP2,TET1,TNFRSF1A,TP53,TRPM4,…
GO:BP	chromatin organization	GO:0006325	3.34724e-05	4.47531	843	219	29	21017	ATG5,ATR,BMI1,DNMT3A,DOT1L,EHMT2,EP300,HDAC1,KAT2A,KAT2B,KDM4D,KDM5C,KDM6A,KMT2C,PAK1,PIK3CA,RPA1,SETD1B,SETDB1,SIN3A,SOX9,SUV39H1,SUV39H2,TET1,TP53,HDAC7,PRKAA2,TAF10,USP21
GO:BP	regulation of cell development	GO:0060284	4.11405e-05	4.38573	851	219	29	21017	ABCC8,BCL2,BDNF,CD83,GRN,HDAC1,KAT2A,MAFB,MEF2C,RELN,RHOA,RIPK1,RIPK2,S100A10,SPP1,TMEM64,TNFRSF1A,TP53,ABL1,AMIGO1,CAMK4,DRD2,FGF2,HAP1,NKX6-2,PPP3CA,RASGRP1,SORL1,TSPO
GO:BP	MAPK cascade	GO:0000165	4.18634e-05	4.37817	749	219	27	21017	ADRA2A,APOE,ATF3,BECN1,CSK,DAB2,DUSP7,MAP3K1,MEF2C,PAK1,PRDX1,RIPK1,RIPK2,SOX9,ABL1,ADCYAP1,CHRNA7,DRD2,FGF12,FGF2,HGF,MAPKAPK2,NTF3,PRKN,PTPRR,RASGRP1,TF
GO:BP	regulation of binding	GO:0051098	4.3217e-05	4.36435	231	219	15	21017	APOE,BDNF,CDKN1A,DAB2,DOT1L,JUN,KDM4D,PEX14,PRKACA,RALB,RIPK2,STMN1,ABL1,NES,PRKN
GO:BP	regulation of response to external stimulus	GO:0032101	4.51729e-05	4.34512	1071	219	33	21017	APOE,ATG5,BECN1,CASP6,CD47,EP300,EPG5,GRN,HSPB1,IRAK2,LACC1,LAMP1,LAMP2,LGMN,NFE2L2,OPTN,PAK1,PROS1,RAC1,RIPK1,RIPK2,SIN3A,SPP1,TARBP2,TNFRSF1A,CNR1,DRD2,FGF2,HGF,MAPKAPK2,NAGLU,NTF3,RASGRP1
GO:BP	protein localization to organelle	GO:0033365	5.02255e-05	4.29908	1189	219	35	21017	ATR,BAG3,BAG4,BECN1,BNIP3L,CDKN1A,DLG4,EP300,LAMP1,LAMP2,MDM2,MSN,NGFR,NPTX1,OPTN,PAK1,PEX14,PRKACA,RAB6B,RAB7A,RPA1,SIN3A,SOX9,TP53,VPS4A,ABL1,APC,CACNB4,CLU,PPP3CA,PRKAA2,PRKN,RYR2,SORL1,TSPO
GO:BP	protein localization	GO:0008104	5.15324e-05	4.28792	2738	219	59	21017	ABCC8,ADRA2A,AKT2,APOE,ATG3,ATR,BAG3,BAG4,BCL2,BDNF,BECN1,BNIP3L,CDKN1A,CLSTN1,CSK,DAB2,DLG4,EP300,GSN,HSPB1,LAMP1,LAMP2,MDM2,MSN,NGFR,NLGN1,NPTX1,OPTN,PAK1,PEX14,PIK3CA,PRKACA,RAB6B,RAB7A,RELN,RPA1,S100A10,SIN3A,SOX9,TNFRSF1A,TP53,TRPM4,VPS4A,ABL1,ADCYAP1,APC,CACNB4,CLU,CNR1,DRD2,HAP1,HCN1,ITPR1,PPP3CA,PRKAA2,PRKN,RYR2,SORL1,TSPO
GO:BP	gliogenesis	GO:0042063	5.18213e-05	4.28549	346	219	18	21017	ABCC8,AKT2,BNIP3,CSK,GRN,HDAC1,RELN,RHOA,SOX9,TP53,ABL1,ARHGEF10,CLU,CNTN1,FGF2,NAGLU,NKX6-2,TSPO
GO:BP	negative regulation of protein metabolic process	GO:0051248	5.39653e-05	4.26789	708	219	26	21017	AGO4,APOE,ATG5,CDKN1A,DUSP7,HSPB1,MDM2,NQO1,PRKAR2A,PRKAR2B,TARBP2,TP53,ABL1,AKT1S1,APC,CHRNA7,CLU,DRD2,HAP1,HGF,NTF3,PRKAA2,PRKCG,PRKN,SORL1,TSPO
GO:BP	regulation of anatomical structure size	GO:0090066	5.47744e-05	4.26142	518	219	22	21017	ADRA2A,APOE,ATG5,BAG4,BDNF,COTL1,GSN,KAT2B,KDM6A,MSN,PIK3CA,RAC1,RHOA,SIN3A,SOD2,SPP1,TRPM4,ABL1,AKT1S1,DBH,MMP2,SLC12A5
GO:BP	regulation of innate immune response	GO:0045088	5.50144e-05	4.25952	430	219	20	21017	APOE,ATG5,BECN1,CASP6,EP300,EPG5,GRN,IRAK2,LACC1,LAMP1,LAMP2,NFE2L2,PAK1,RIPK2,SIN3A,TARBP2,DRD2,MAPKAPK2,NAGLU,RASGRP1
GO:BP	negative regulation of cell cycle	GO:0045786	5.51204e-05	4.25869	388	219	19	21017	ATR,BCL2,CASP2,CDKN1A,DOT1L,KAT2A,KAT2B,MDM2,MRE11,RAD50,RAD9A,SUV39H1,TP53,VPS4A,ABL1,ADCYAP1,APC,CACNB4,CCND1
GO:BP	response to nutrient	GO:0007584	5.63623e-05	4.24901	170	219	13	21017	BECN1,DNMT3A,KAT2B,KDM6A,MDM2,NQO1,SETDB1,SOD2,SPP1,APAF1,BCHE,CNR1,TSPO
GO:BP	tissue morphogenesis	GO:0048729	5.81986e-05	4.23509	613	219	24	21017	ASB2,BCL2,CLIC4,CYP7B1,KAT2A,KDM6A,MDM2,MEF2C,MSN,NGFR,NRP2,PAK1,PRKACA,RHOA,SOX9,ABL1,APAF1,APC,FGF2,HGF,MMP2,NAGLU,RYR2,TAF10
GO:BP	cellular macromolecule localization	GO:0070727	5.95912e-05	4.22482	2749	219	59	21017	ABCC8,ADRA2A,AKT2,APOE,ATG3,ATR,BAG3,BAG4,BCL2,BDNF,BECN1,BNIP3L,CDKN1A,CLSTN1,CSK,DAB2,DLG4,EP300,GSN,HSPB1,LAMP1,LAMP2,MDM2,MSN,NGFR,NLGN1,NPTX1,OPTN,PAK1,PEX14,PIK3CA,PRKACA,RAB6B,RAB7A,RELN,RPA1,S100A10,SIN3A,SOX9,TNFRSF1A,TP53,TRPM4,VPS4A,ABL1,ADCYAP1,APC,CACNB4,CLU,CNR1,DRD2,HAP1,HCN1,ITPR1,PPP3CA,PRKAA2,PRKN,RYR2,SORL1,TSPO
GO:BP	developmental growth	GO:0048589	7.28499e-05	4.13757	669	219	25	21017	APOE,BCL2,BDNF,CDKN1A,CLIC4,EHMT2,EP300,KAT2A,KDM6A,LGMN,MEF2C,NRP2,PIK3CA,RAD51B,SIN3A,SOX9,SPP1,TP53,ABL1,DRD2,FGF2,PPP3CA,PRKN,SLC12A5,TAF10
GO:BP	autophagy of mitochondrion	GO:0000422	8.10099e-05	4.09146	69	219	9	21017	ATG5,BECN1,BNIP3,BNIP3L,OPTN,TP53,PRKN,TAZ,TSPO
GO:BP	cellular response to starvation	GO:0009267	9.10558e-05	4.04069	177	219	13	21017	ATF3,ATG5,BCL2,BECN1,CDKN1A,EHMT2,LAMP2,NFE2L2,RALB,SESN1,SUV39H1,TP53,PRKAA2
GO:BP	DNA metabolic process	GO:0006259	9.46042e-05	4.02409	993	219	31	21017	ADRA2A,ATR,CDKN1A,DOT1L,EHMT2,KAT2A,KAT2B,KDM4D,LIG1,MCM6,MRE11,NTHL1,PCNA,POLE,PRKCQ,PTMS,RAD50,RAD51B,RAD51C,RAD9A,RPA1,SIN3A,SMC1A,TP53,ABL1,APAF1,FGF2,HGF,MUTYH,PRKCG,TAF10
GO:BP	regulation of postsynaptic membrane potential	GO:0060078	0.000101931	3.99169	148	219	12	21017	DLG4,GRIA1,GRIA2,GRIN2B,MEF2C,NLGN1,RELN,CHRNA7,DRD2,GABRG2,HCN1,PPP3CA
GO:BP	cell cycle phase transition	GO:0044770	0.000103391	3.98552	537	219	22	21017	ATR,BCL2,CASP2,CDKN1A,CKS1B,DOT1L,MDM2,MRE11,POLE,RAD50,RAD51B,RAD51C,RAD9A,SIN3A,TP53,VPS4A,APC,CACNB4,CCND1,NES,PPP3CA,TAF10
GO:BP	regulation of defense response	GO:0031347	0.000104123	3.98245	783	219	27	21017	APOE,ATG5,BECN1,CASP6,CD47,EP300,EPG5,GRN,IRAK2,LACC1,LAMP1,LAMP2,MEF2C,NFE2L2,OPTN,PAK1,RIPK1,RIPK2,SIN3A,TARBP2,TNFRSF1A,CNR1,DRD2,HGF,MAPKAPK2,NAGLU,RASGRP1
GO:BP	positive regulation of immune response	GO:0050778	0.000104851	3.97943	732	219	26	21017	BCL2,BECN1,CASP6,CD47,CD8A,CSK,EP300,EPG5,IRAK2,LACC1,LAMP1,LAMP2,MEF2C,PAK1,PIK3CA,PRKCQ,RIPK2,SIN3A,TARBP2,ABL1,CACNB4,CLU,CNR1,MAPKAPK2,NAGLU,RASGRP1
GO:BP	defense response to other organism	GO:0098542	0.000111418	3.95305	1228	219	35	21017	APOE,ATG5,BCL2,BECN1,BNIP3,BNIP3L,CASP6,CD47,COTL1,EP300,EPG5,GRN,GSN,IFNAR2,IRAK2,LACC1,LAMP1,LAMP2,NFE2L2,NQO1,OPTN,PAK1,PRDX1,RELB,RIPK2,SIN3A,TARBP2,TNFRSF1A,TP53,CLU,DRD2,MAPKAPK2,NAGLU,RASGRP1,TF
GO:BP	cellular response to decreased oxygen levels	GO:0036294	0.000118322	3.92694	150	219	12	21017	BCL2,BECN1,BNIP3,BNIP3L,DNMT3A,KDM6A,MDM2,NFE2L2,SUV39H1,SUV39H2,TP53,DRD2
GO:BP	head development	GO:0060322	0.0001216	3.91507	789	219	27	21017	BCL2,BMI1,BNIP3,EP300,GRIA1,GRIN2B,HDAC1,HPRT1,KAT2A,MAFB,NRP2,RELN,RHOA,SIN3A,SOX9,TP53,ABL1,AMIGO1,APAF1,CNTN1,DRD2,FGF2,HAP1,MMP2,NAGLU,NES,NR4A2
GO:BP	positive regulation of stress fiber assembly	GO:0051496	0.000124126	3.90614	52	219	8	21017	BAG4,CD47,PAK1,RAC1,RHOA,S100A10,ABL1,ARHGEF10
GO:BP	activation of immune response	GO:0002253	0.000125596	3.90102	543	219	22	21017	BCL2,BECN1,CASP6,CD47,CD8A,CSK,EP300,EPG5,IRAK2,LACC1,LAMP2,MEF2C,PAK1,PIK3CA,RIPK2,SIN3A,TARBP2,ABL1,CACNB4,CLU,MAPKAPK2,NAGLU
GO:BP	regulation of intrinsic apoptotic signaling pathway	GO:2001242	0.000126549	3.89774	182	219	13	21017	BCL2,BECN1,HDAC1,HSPB1,KDM6A,MDM2,NFE2L2,RAD9A,SOD2,TP53,CLU,MMP2,PRKN
GO:BP	negative regulation of cell migration	GO:0030336	0.000128832	3.88998	288	219	16	21017	ABCC8,APOE,BCL2,CLIC4,CNN2,HDAC1,MEF2C,NFE2L2,NGFR,RAC1,RHOA,SIN3A,TET1,DRD2,FGF2,PTPRR
GO:BP	negative regulation of molecular function	GO:0044092	0.000132457	3.87793	592	219	23	21017	ADRA2A,APOE,CDKN1A,DAB2,DUSP7,GRM2,GRM3,HSPB1,IRAK2,JUN,PEX14,PRKAR2A,PRKAR2B,RALB,STMN1,TARBP2,TP53,ABL1,AKT1S1,APC,DRD2,NES,PRKN
GO:BP	cellular response to mechanical stimulus	GO:0071260	0.000133863	3.87334	73	219	9	21017	BAG3,BNIP3,CASP2,CNN2,MAP3K1,SOX9,TNFRSF10B,TNFRSF1A,FGF2
GO:BP	negative regulation of phosphate metabolic process	GO:0045936	0.000141387	3.84959	329	219	17	21017	APOE,CDKN1A,DUSP7,HSPB1,PRKACA,PRKAR2A,PRKAR2B,TARBP2,TP53,ABL1,AKT1S1,APC,DRD2,HGF,NTF3,PRKN,TSPO
GO:BP	negative regulation of phosphorus metabolic process	GO:0010563	0.000141387	3.84959	329	219	17	21017	APOE,CDKN1A,DUSP7,HSPB1,PRKACA,PRKAR2A,PRKAR2B,TARBP2,TP53,ABL1,AKT1S1,APC,DRD2,HGF,NTF3,PRKN,TSPO
GO:BP	defense response to symbiont	GO:0140546	0.000144442	3.84031	1125	219	33	21017	APOE,ATG5,BCL2,BECN1,BNIP3,BNIP3L,CASP6,CD47,EP300,EPG5,GRN,GSN,IFNAR2,IRAK2,LACC1,LAMP1,LAMP2,NFE2L2,NQO1,OPTN,PAK1,PRDX1,RELB,RIPK2,SIN3A,TARBP2,TP53,CLU,DRD2,MAPKAPK2,NAGLU,RASGRP1,TF
GO:BP	response to cocaine	GO:0042220	0.000144892	3.83896	53	219	8	21017	DNMT3A,EHMT2,GRIA1,GRM2,MDM2,SLC6A1,CNR1,DRD2
GO:BP	inorganic ion transmembrane transport	GO:0098660	0.000147661	3.83073	903	219	29	21017	ABCC8,ADRA2A,ATG5,BCL2,CLIC4,COX5B,GRIN2B,PRKACA,SLC17A6,SLC6A1,TRPM4,ABL1,AMIGO1,ATP6V0E1,CACNA1C,CACNB4,CHRNA7,DRD2,FGF12,FGF2,GABRG2,GABRR1,HAP1,HCN1,ITPR1,PPP3CA,RYR1,RYR2,SLC12A5
GO:BP	cellular response to external stimulus	GO:0071496	0.000151031	3.82093	74	219	9	21017	BAG3,BNIP3,CASP2,CNN2,MAP3K1,SOX9,TNFRSF10B,TNFRSF1A,FGF2
GO:BP	immune response-regulating signaling pathway	GO:0002764	0.000159246	3.79793	504	219	21	21017	BCL2,BECN1,CD47,CD8A,CSK,EP300,EPG5,IRAK2,LACC1,LAMP2,MAP3K1,MEF2C,PAK1,PIK3CA,PRKCQ,RIPK2,TARBP2,ABL1,CACNB4,MAPKAPK2,NAGLU
GO:BP	embryo development	GO:0009790	0.000160193	3.79536	1130	219	33	21017	ASB2,BMI1,CDKN1A,EP300,HDAC1,KAT2A,KAT2B,KDM6A,MAFB,MAFF,MEF2C,NFE2L2,NRP2,POLE,PRKACA,RAD51B,SIN3A,SOX9,TET1,TP53,ABL1,ADCY9,APAF1,CACNA1C,COL4A2,FGF2,ITGA7,MMP2,NAGLU,NES,PTPRR,RYR2,TAF10
GO:BP	negative regulation of protein modification process	GO:0031400	0.000161771	3.7911	373	219	18	21017	APOE,ATG5,CDKN1A,DUSP7,HSPB1,PRKAR2A,PRKAR2B,TARBP2,ABL1,AKT1S1,APC,DRD2,HGF,NTF3,PRKAA2,PRKCG,PRKN,TSPO
GO:BP	regulation of protein binding	GO:0043393	0.000174175	3.75901	126	219	11	21017	APOE,BDNF,CDKN1A,DAB2,PEX14,PRKACA,RALB,RIPK2,ABL1,NES,PRKN
GO:BP	blood circulation	GO:0008015	0.000181866	3.74025	508	219	21	21017	ABCC8,ADRA2A,APOE,ATG5,GSN,KAT2B,MDM2,PIK3CA,PRKACA,RHOA,SOD2,TRPM4,ABL1,CACNA1C,CNR1,DBH,DRD2,FGF12,MMP2,RYR2,TAZ
GO:BP	learning	GO:0007612	0.000182577	3.73855	156	219	12	21017	ABCC8,DLG4,LGMN,PRKAR2B,RELN,SLC6A1,ABL1,BCHE,DBH,DRD2,PRKN,SLC12A5
GO:BP	mitophagy	GO:0000423	0.000195516	3.70882	55	219	8	21017	ATG5,BECN1,BNIP3L,OPTN,TP53,PRKN,TAZ,TSPO
GO:BP	multicellular organismal-level homeostasis	GO:0048871	0.000201613	3.69548	809	219	27	21017	ABCC8,APOE,BCL2,CSK,FABP5,JAM2,MAFB,MEF2C,PIK3CA,PRDX1,PRKACA,RAB7A,SOD2,SOX9,SPP1,SUV39H1,TMEM64,ABL1,ADCYAP1,APC,CNR1,DBH,DRD2,NAGLU,PRKAA2,SORL1,TF
GO:BP	glial cell differentiation	GO:0010001	0.000205917	3.68631	260	219	15	21017	AKT2,BNIP3,CSK,GRN,HDAC1,RELN,RHOA,SOX9,ABL1,ARHGEF10,CLU,CNTN1,FGF2,NAGLU,NKX6-2
GO:BP	regulation of protein serine/threonine kinase activity	GO:0071900	0.000205917	3.68631	260	219	15	21017	ADRA2A,APOE,CDKN1A,DUSP7,PAK1,PRKAR2A,PRKAR2B,RALB,RHOA,ABL1,APC,CCND1,FGF2,NTF3,RASGRP1
GO:BP	calcium ion transmembrane import into cytosol	GO:0097553	0.000209697	3.67841	190	219	13	21017	ATG5,BCL2,GRIN2B,PRKACA,ABL1,CACNA1C,DRD2,FGF2,HAP1,ITPR1,PPP3CA,RYR1,RYR2
GO:BP	calcium ion transmembrane transport	GO:0070588	0.000217355	3.66283	339	219	17	21017	ADRA2A,ATG5,BCL2,GRIN2B,PRKACA,TRPM4,ABL1,CACNA1C,CACNB4,CHRNA7,DRD2,FGF2,HAP1,ITPR1,PPP3CA,RYR1,RYR2
GO:BP	positive regulation of protein kinase activity	GO:0045860	0.000227536	3.64295	262	219	15	21017	ADRA2A,CDKN1A,DLG4,PAK1,PILRB,RALB,RELN,RHOA,TNFRSF10B,ABL1,ADCYAP1,CCND1,FGF2,NTF3,RASGRP1
GO:BP	regulation of response to biotic stimulus	GO:0002831	0.000228708	3.64072	515	219	21	21017	APOE,ATG5,BECN1,CASP6,EP300,EPG5,GRN,IRAK2,LACC1,LAMP1,LAMP2,NFE2L2,OPTN,PAK1,RIPK2,SIN3A,TARBP2,DRD2,MAPKAPK2,NAGLU,RASGRP1
GO:BP	negative regulation of cell cycle process	GO:0010948	0.000236156	3.6268	301	219	16	21017	ATR,BCL2,CASP2,CDKN1A,DOT1L,KAT2A,KAT2B,MDM2,MRE11,RAD50,RAD9A,TP53,VPS4A,APC,CACNB4,CCND1
GO:BP	regulation of actin filament bundle assembly	GO:0032231	0.000249189	3.60347	103	219	10	21017	BAG4,CD47,PAK1,RAC1,RHOA,S100A10,STMN1,ABL1,ARHGEF10,PRKN
GO:BP	regulation of cytokine production	GO:0001817	0.000249309	3.60326	765	219	26	21017	ABCC8,ADRA2A,ATG5,CD47,CD83,CSK,HSPB1,KAT2A,LACC1,PRKCQ,RAC1,RELB,RIPK1,RIPK2,TRPM4,ABL1,ADCYAP1,CHRNA7,CLU,DRD2,HDAC7,HGF,MAPKAPK2,RASGRP1,SORL1,TSPO
GO:BP	intracellular pH reduction	GO:0051452	0.000260643	3.58395	57	219	8	21017	BCL2,CLIC4,GRN,LAMP1,LAMP2,RAB7A,ATP6V0E1,SLC12A5
GO:BP	negative regulation of cell motility	GO:2000146	0.000270364	3.56805	304	219	16	21017	ABCC8,APOE,BCL2,CLIC4,CNN2,HDAC1,MEF2C,NFE2L2,NGFR,RAC1,RHOA,SIN3A,TET1,DRD2,FGF2,PTPRR
GO:BP	apoptotic mitochondrial changes	GO:0008637	0.000273214	3.5635	104	219	10	21017	ATG3,BCL2,BNIP3,BNIP3L,NPTX1,SOD2,TP53,CLU,HGF,PRKN
GO:BP	long-term memory	GO:0007616	0.000280831	3.55155	39	219	7	21017	APOE,EHMT2,GRIA1,KAT2A,RELN,CAMK4,DRD2
GO:BP	positive regulation of DNA-templated transcription	GO:0045893	0.000283163	3.54796	1710	219	42	21017	APOE,ATF3,DAB2,DOT1L,EP300,EPCAM,HDAC1,JUN,KAT2A,KAT2B,KDM6A,KMT2C,MAFB,MAFF,MEF2C,NFE2L2,NGFR,PTMS,RELB,RIPK1,RIPK2,S100A10,SOX9,SPP1,TET1,TNFRSF1A,TP53,ABL1,ACTN1,ADCYAP1,CAMK4,CRTC2,CXXC1,DRD2,FGF2,HGF,NR4A2,PPP3CA,PRKN,TAF10,TF,USP21
GO:BP	regulation of transmembrane transporter activity	GO:0022898	0.000283916	3.54681	195	219	13	21017	ADRA2A,BCL2,DLG4,MEF2C,NLGN1,PRKACA,RELN,RIPK1,CACNB4,DRD2,FGF12,HAP1,RYR2
GO:BP	positive regulation of RNA biosynthetic process	GO:1902680	0.000297065	3.52715	1713	219	42	21017	APOE,ATF3,DAB2,DOT1L,EP300,EPCAM,HDAC1,JUN,KAT2A,KAT2B,KDM6A,KMT2C,MAFB,MAFF,MEF2C,NFE2L2,NGFR,PTMS,RELB,RIPK1,RIPK2,S100A10,SOX9,SPP1,TET1,TNFRSF1A,TP53,ABL1,ACTN1,ADCYAP1,CAMK4,CRTC2,CXXC1,DRD2,FGF2,HGF,NR4A2,PPP3CA,PRKN,TAF10,TF,USP21
GO:BP	mitotic cell cycle phase transition	GO:0044772	0.0002971	3.5271	432	219	19	21017	BCL2,CASP2,CDKN1A,CKS1B,MDM2,MRE11,POLE,RAD50,RAD51B,RAD51C,SIN3A,TP53,VPS4A,APC,CACNB4,CCND1,NES,PPP3CA,TAF10
GO:BP	cytokine production	GO:0001816	0.000297618	3.52634	772	219	26	21017	ABCC8,ADRA2A,ATG5,CD47,CD83,CSK,HSPB1,KAT2A,LACC1,PRKCQ,RAC1,RELB,RIPK1,RIPK2,TRPM4,ABL1,ADCYAP1,CHRNA7,CLU,DRD2,HDAC7,HGF,MAPKAPK2,RASGRP1,SORL1,TSPO
GO:BP	lysosomal transport	GO:0007041	0.000327678	3.48455	134	219	11	21017	BECN1,EPG5,GRN,IGF2R,LAMP1,LAMP2,RAB7A,VPS4A,CLU,PRKN,SORL1
GO:BP	response to axon injury	GO:0048678	0.000334726	3.47531	81	219	9	21017	BCL2,BNIP3,GRN,SOD2,SPP1,DRD2,FGF2,MMP2,TSPO
GO:BP	growth	GO:0040007	0.000352424	3.45293	941	219	29	21017	APOE,BCL2,BDNF,CDKN1A,CLIC4,CLSTN1,DAB2,EHMT2,EP300,KAT2A,KDM6A,LGMN,MEF2C,NRP2,OSGIN1,PIK3CA,PRKCQ,RAD51B,SIN3A,SOX9,SPP1,TP53,ABL1,DRD2,FGF2,PPP3CA,PRKN,SLC12A5,TAF10
GO:BP	phagocytosis	GO:0006909	0.00035552	3.44914	234	219	14	21017	ATG3,ATG5,BECN1,CD47,CNN2,CSK,DOCK1,GSN,PAK1,PIK3CA,RAB7A,RAC1,ABL1,PRKCG
GO:BP	negative regulation of apoptotic signaling pathway	GO:2001234	0.00035552	3.44914	234	219	14	21017	BCL2,BDNF,BMI1,HDAC1,HSPB1,KDM6A,MDM2,NFE2L2,RIPK1,SOD2,CLU,HGF,NR4A2,PRKN
GO:BP	regulation of anatomical structure morphogenesis	GO:0022603	0.000379228	3.4211	835	219	27	21017	ABCC8,AGO4,BDNF,BNIP3,DLG4,GRN,HSPB1,MEF2C,MSN,NFE2L2,NGFR,NLGN1,PAK1,RAC1,RELN,SOX9,SPP1,TSPAN18,ABL1,AMIGO1,CHRNA7,COL4A2,FGF2,HGF,ITGA7,PPP3CA,PRKN
GO:BP	cellular response to oxygen levels	GO:0071453	0.000385219	3.41429	167	219	12	21017	BCL2,BECN1,BNIP3,BNIP3L,DNMT3A,KDM6A,MDM2,NFE2L2,SUV39H1,SUV39H2,TP53,DRD2
GO:BP	muscle structure development	GO:0061061	0.000388199	3.41095	679	219	24	21017	ASB2,ATF3,ATG5,BCL2,BDNF,DOCK1,EP300,JAM2,KAT2A,MAFF,MDM2,MEF2C,MYORG,RHOA,SOD2,SOX9,ACTN1,CACNB4,ITGA7,NAGLU,PPP3CA,RYR1,RYR2,TAZ
GO:BP	amyloid fibril formation	GO:1990000	0.000403292	3.39438	41	219	7	21017	APOE,GSN,MDM2,RIPK1,CHRNA7,CLU,PRKN
GO:BP	regulation of endothelial cell migration	GO:0010594	0.000411087	3.38607	168	219	12	21017	APOE,GRN,HSPB1,LGMN,MEF2C,NFE2L2,NRP2,RAC1,RHOA,ABL1,FGF2,HDAC7
GO:BP	regulation of small molecule metabolic process	GO:0062012	0.000419485	3.37728	314	219	16	21017	AKT2,APOE,DAB2,EP300,FABP5,KAT2A,KAT2B,LACC1,PRKACA,SOX9,TP53,CNR1,PRKAA2,PRKN,TAZ,TSPO
GO:BP	regulation of vascular associated smooth muscle cell proliferation	GO:1904705	0.000448196	3.34853	61	219	8	21017	CDKN1A,JUN,MDM2,MEF2C,SOD2,DBH,FGF2,MMP2
GO:BP	positive regulation of secretion	GO:0051047	0.000476959	3.32152	317	219	16	21017	ABCC8,ATG5,DAB2,LAMP1,NLGN1,PRKACA,RAB7A,S100A10,SLC6A1,SPP1,TRPM4,VPS4A,ADCYAP1,DRD2,ITPR1,PPP3CA
GO:BP	nervous system process	GO:0050877	0.000479932	3.31882	1489	219	38	21017	ABCC8,ADRA2A,APOE,BDNF,DLG4,EHMT2,EP300,FABP5,GRIA1,GRIN2B,JAM2,KAT2A,KAT2B,LGMN,MEF2C,NLGN1,PRKAR2B,RELN,SLC6A1,SOD2,ABL1,BCHE,CACNB4,CAMK4,CHRNA7,CNR1,DBH,DRD2,FGF12,HCN1,ITPR1,NKX6-2,NTF3,PNKD,PPP3CA,PRKCG,PRKN,SLC12A5
GO:BP	immune response	GO:0006955	0.000487203	3.31229	2008	219	46	21017	APOE,ATG5,BCL2,BECN1,BMI1,CASP6,CD47,CD83,CD8A,CRIP1,CSK,EP300,EPG5,GRN,GSN,HPRT1,IFNAR2,IRAK2,LACC1,LAMP1,LAMP2,MAP3K1,MEF2C,NFE2L2,NQO1,OPTN,PAK1,PIK3CA,PRDX1,PRKCQ,RELB,RIPK2,SIN3A,TARBP2,TP53,TRPM4,ABL1,CACNB4,CAMK4,CLU,CNR1,DRD2,MAPKAPK2,NAGLU,RASGRP1,TF
GO:BP	cellular response to hormone stimulus	GO:0032870	0.000488639	3.31101	637	219	23	21017	ADRA2A,AKT2,CSK,CYP7B1,DAB2,EP300,GRIA1,HDAC1,KAT2B,KDM6A,MDM2,MEF2C,NFE2L2,PAK1,PIK3CA,PRKACA,PRKCQ,RHOA,APC,NR4A2,PPP3CA,PRKAA2,SORL1
GO:BP	signal release	GO:0023061	0.000504653	3.29701	493	219	20	21017	ABCC8,ADRA2A,DAB2,GRM2,MEF2C,NLGN1,PRKACA,SPP1,SYP,TRPM4,ADCYAP1,CACNB4,CNR1,DRD2,ITPR1,PNKD,PPP3CA,PRKCG,PRKN,TSPO
GO:BP	positive regulation of actin filament bundle assembly	GO:0032233	0.00051002	3.29241	62	219	8	21017	BAG4,CD47,PAK1,RAC1,RHOA,S100A10,ABL1,ARHGEF10
GO:BP	regulation of smooth muscle cell proliferation	GO:0048660	0.00051177	3.29092	140	219	11	21017	APOE,CDKN1A,HDAC1,JUN,MDM2,MEF2C,PIK3CA,SOD2,DBH,FGF2,MMP2
GO:BP	response to light stimulus	GO:0009416	0.000519151	3.28471	319	219	16	21017	ABCC8,AKT2,ATR,BCL2,CDKN1A,CRIP1,EP300,MDM2,PCNA,TP53,CACNB4,CCND1,CPT1B,DBH,DRD2,MMP2
GO:BP	negative regulation of catalytic activity	GO:0043086	0.000519151	3.28471	319	219	16	21017	APOE,CDKN1A,DUSP7,GRM2,GRM3,HSPB1,PRKAR2A,PRKAR2B,TARBP2,TP53,ABL1,AKT1S1,APC,DRD2,NES,PRKN
GO:BP	cell junction assembly	GO:0034329	0.000537637	3.26951	449	219	19	21017	BCL2,BDNF,CLSTN1,GRIA1,MEF2C,NLGN1,NPTX1,PRKACA,RAC1,RHOA,S100A10,ABL1,ACTN1,AMIGO1,APC,DRD2,GABRG2,HDAC7,NEGR1
GO:BP	regulation of monoatomic ion transmembrane transport	GO:0034765	0.000564702	3.24818	321	219	16	21017	ADRA2A,ATG5,BCL2,GRIN2B,PRKACA,RELN,RIPK1,ABL1,AMIGO1,CACNA1C,CACNB4,DRD2,FGF12,HAP1,PPP3CA,RYR2
GO:BP	circadian rhythm	GO:0007623	0.00056658	3.24674	207	219	13	21017	EP300,HDAC1,NGFR,NLGN1,RELB,SIN3A,SUV39H1,SUV39H2,TP53,DRD2,NAGLU,PRKAA2,PRKCG
GO:BP	vascular associated smooth muscle cell proliferation	GO:1990874	0.00057901	3.23731	63	219	8	21017	CDKN1A,JUN,MDM2,MEF2C,SOD2,DBH,FGF2,MMP2
GO:BP	regulation of transporter activity	GO:0032409	0.000598858	3.22268	208	219	13	21017	ADRA2A,BCL2,DLG4,MEF2C,NLGN1,PRKACA,RELN,RIPK1,CACNB4,DRD2,FGF12,HAP1,RYR2
GO:BP	muscle cell proliferation	GO:0033002	0.000632773	3.19875	209	219	13	21017	APOE,CDKN1A,HDAC1,JUN,MDM2,MEF2C,PIK3CA,SOD2,ABL1,DBH,FGF2,HGF,MMP2
GO:BP	cellular response to hypoxia	GO:0071456	0.000634294	3.19771	143	219	11	21017	BCL2,BNIP3,BNIP3L,DNMT3A,KDM6A,MDM2,NFE2L2,SUV39H1,SUV39H2,TP53,DRD2
GO:BP	positive regulation of transcription by RNA polymerase II	GO:0045944	0.000651286	3.18623	1261	219	34	21017	ATF3,DAB2,DOT1L,EP300,EPCAM,HDAC1,JUN,KAT2A,KAT2B,KDM6A,KMT2C,MAFB,MAFF,MEF2C,NFE2L2,PTMS,RELB,RIPK1,RIPK2,S100A10,SOX9,TET1,TNFRSF1A,TP53,ABL1,ADCYAP1,CRTC2,DRD2,FGF2,HGF,NR4A2,PPP3CA,PRKN,TAF10
GO:BP	negative regulation of reactive oxygen species metabolic process	GO:2000378	0.00066943	3.17429	44	219	7	21017	ATG5,BCL2,BECN1,BNIP3,RHOA,TP53,PRKN
GO:BP	morphogenesis of an epithelium	GO:0002009	0.000672105	3.17256	502	219	20	21017	ASB2,BCL2,CLIC4,CYP7B1,KAT2A,KDM6A,MEF2C,MSN,NGFR,PAK1,PRKACA,RHOA,SOX9,ABL1,APAF1,FGF2,HGF,MMP2,NAGLU,RYR2
GO:BP	hemopoiesis	GO:0030097	0.000676341	3.16983	971	219	29	21017	ATG5,BCL2,BMI1,CD83,CD8A,CNN2,DOCK1,EP300,KAT2A,MAFB,MEF2C,NFE2L2,RELB,RHOA,RIPK1,RIPK2,SIN3A,SOD2,TMEM64,TP53,TPD52,ABL1,ACTN1,CAMK4,NAGLU,PPP3CA,RASGRP1,TAZ,TF
GO:BP	smooth muscle cell proliferation	GO:0048659	0.000680543	3.16714	144	219	11	21017	APOE,CDKN1A,HDAC1,JUN,MDM2,MEF2C,PIK3CA,SOD2,DBH,FGF2,MMP2
GO:BP	T cell differentiation in thymus	GO:0033077	0.000688297	3.16222	88	219	9	21017	ATG5,BCL2,BMI1,MAFB,RIPK2,TP53,ABL1,CAMK4,RASGRP1
GO:BP	regulation of metal ion transport	GO:0010959	0.000721926	3.14151	369	219	17	21017	ABCC8,ADRA2A,ATG5,BCL2,PRKACA,ABL1,AMIGO1,CACNA1C,CACNB4,CNTN1,DRD2,FGF12,HAP1,PPP3CA,RYR2,TF,TSPO
GO:BP	regulation of neuron projection development	GO:0010975	0.000727447	3.1382	458	219	19	21017	APOE,BDNF,DAB2,EP300,GRN,KAT2B,MDM2,NFE2L2,NLGN1,PAK1,RELN,RHOA,SPP1,ABL1,AMIGO1,CNR1,CNTN1,NEGR1,PPP3CA
GO:BP	negative regulation of nucleobase-containing compound metabolic process	GO:0045934	0.000748516	3.1258	1579	219	39	21017	ATF3,ATR,BAG4,BMI1,CDKN1A,DAB2,DNMT3A,EHMT2,EP300,HDAC1,JUN,KAT2A,KAT2B,KDM5C,MAFB,MAFF,MDM2,MEF2C,PCNA,PEX14,PRKACA,RAD50,RELB,SETDB1,SIN3A,SOX9,SUV39H1,SUV39H2,TET1,TP53,ABL1,CCND1,HDAC7,MAPKAPK2,NKX6-2,NR4A2,PRKN,TENM2,TSPO
GO:BP	regulation of synapse structure or activity	GO:0050803	0.000757916	3.12038	249	219	14	21017	APOE,BDNF,CLSTN1,GRIN2B,MEF2C,NLGN1,NRP2,RELN,RHOA,SLC17A6,ABL1,AMIGO1,DRD2,NEGR1
GO:BP	inorganic cation transmembrane transport	GO:0098662	0.000767429	3.11496	811	219	26	21017	ABCC8,ADRA2A,ATG5,BCL2,COX5B,GRIN2B,PRKACA,SLC17A6,SLC6A1,TRPM4,ABL1,AMIGO1,ATP6V0E1,CACNA1C,CACNB4,CHRNA7,DRD2,FGF12,FGF2,HAP1,HCN1,ITPR1,PPP3CA,RYR1,RYR2,SLC12A5
GO:BP	innate immune response	GO:0045087	0.000767827	3.11474	977	219	29	21017	APOE,ATG5,BECN1,CASP6,CD47,EP300,EPG5,GRN,GSN,IFNAR2,IRAK2,LACC1,LAMP1,LAMP2,NFE2L2,NQO1,OPTN,PAK1,PRDX1,RELB,RIPK2,SIN3A,TARBP2,TP53,CLU,DRD2,MAPKAPK2,NAGLU,RASGRP1
GO:BP	positive regulation of RNA metabolic process	GO:0051254	0.000815495	3.08858	1844	219	43	21017	APOE,ATF3,DAB2,DOT1L,EIF1,EP300,EPCAM,HDAC1,JUN,KAT2A,KAT2B,KDM6A,KMT2C,MAFB,MAFF,MEF2C,NFE2L2,NGFR,PTMS,RELB,RIPK1,RIPK2,S100A10,SOX9,SPP1,TET1,TNFRSF1A,TP53,ABL1,ACTN1,ADCYAP1,CAMK4,CRTC2,CXXC1,DRD2,FGF2,HGF,NR4A2,PPP3CA,PRKN,TAF10,TF,USP21
GO:BP	regulation of amide metabolic process	GO:0034248	0.000835985	3.0778	66	219	8	21017	APOE,NFE2L2,TNFRSF1A,TP53,CHRNA7,CLU,HAP1,SORL1
GO:BP	cellular response to hydrogen peroxide	GO:0070301	0.000835985	3.0778	66	219	8	21017	BECN1,BNIP3,MDM2,NFE2L2,NQO1,PCNA,RIPK1,ABL1
GO:BP	T cell activation	GO:0042110	0.000858762	3.06613	558	219	21	21017	ATG5,BCL2,BMI1,CD47,CD83,CD8A,CSK,GSN,KAT2A,MAFB,MSN,PIK3CA,PRKCQ,RELB,RHOA,RIPK2,TP53,ABL1,CAMK4,PPP3CA,RASGRP1
GO:BP	tissue remodeling	GO:0048771	0.000866761	3.0621	180	219	12	21017	ATG5,CSK,MDM2,MEF2C,RAB7A,SPP1,TMEM64,TP53,DBH,MMP2,PPP3CA,TF
GO:BP	axonogenesis	GO:0007409	0.000886114	3.05251	464	219	19	21017	APOE,BCL2,BDNF,NGFR,NPTX1,NRP2,PAK1,PRKCQ,RAC1,RELN,SIN3A,SPP1,STMN1,ABL1,AMIGO1,CNTN1,DRD2,EPHA6,NR4A2
GO:BP	negative regulation of secretion by cell	GO:1903531	0.000896755	3.04733	148	219	11	21017	ABCC8,ADRA2A,APOE,RAB7A,TNFRSF1A,CNR1,DRD2,PNKD,PPP3CA,PRKN,TSPO
GO:BP	regulation of actin filament-based process	GO:0032970	0.000904364	3.04366	375	219	17	21017	BAG4,CD47,CNN2,COTL1,GSN,PAK1,PIK3CA,RAC1,RHOA,S100A10,STMN1,TRPM4,ABL1,ARHGEF10,CACNA1C,PRKN,RYR2
GO:BP	regulation of long-term synaptic potentiation	GO:1900271	0.00091866	3.03685	46	219	7	21017	APOE,LGMN,RELN,ABL1,CALB2,CHRNA7,DRD2
GO:BP	regulation of stress fiber assembly	GO:0051492	0.000919047	3.03666	91	219	9	21017	BAG4,CD47,PAK1,RAC1,RHOA,S100A10,STMN1,ABL1,ARHGEF10
GO:BP	DNA repair	GO:0006281	0.000923871	3.03439	610	219	22	21017	ATR,DOT1L,KAT2A,KAT2B,KDM4D,LIG1,MCM6,MRE11,NTHL1,PCNA,POLE,RAD50,RAD51B,RAD51C,RAD9A,RPA1,SMC1A,TP53,ABL1,MUTYH,PRKCG,TAF10
GO:BP	response to iron ion	GO:0010039	0.000929516	3.03174	29	219	6	21017	ATG5,BCL2,BECN1,MDM2,DRD2,TF
GO:BP	regulation of protein-containing complex assembly	GO:0043254	0.00093371	3.02979	420	219	18	21017	APOE,ATR,BAG4,COTL1,EP300,GSN,LAMP2,MSN,PAK1,RAC1,RALB,RHOA,SOX9,STMN1,TP53,ABL1,CLU,SORL1
GO:BP	metal ion transport	GO:0030001	0.000951081	3.02178	875	219	27	21017	ABCC8,ADRA2A,ATG5,BCL2,GRIN2B,PRKACA,SLC17A6,SLC6A1,TRPM4,ABL1,AMIGO1,CACNA1C,CACNB4,CHRNA7,CNTN1,DRD2,FGF12,FGF2,HAP1,HCN1,ITPR1,PPP3CA,RYR1,RYR2,SLC12A5,TF,TSPO
GO:BP	muscle tissue development	GO:0060537	0.00096652	3.01479	421	219	18	21017	ASB2,ATF3,ATG5,BCL2,EP300,KAT2A,MAFF,MEF2C,MYORG,RHOA,SOX9,ABL1,FGF2,NAGLU,PPP3CA,RYR1,RYR2,TAZ
GO:BP	DNA biosynthetic process	GO:0071897	0.000975885	3.0106	182	219	12	21017	ATR,CDKN1A,LIG1,MRE11,PCNA,POLE,PRKCQ,RAD50,RPA1,TP53,FGF2,HGF
GO:BP	response to starvation	GO:0042594	0.00102459	2.98945	218	219	13	21017	ATF3,ATG5,BCL2,BECN1,CDKN1A,EHMT2,LAMP2,NFE2L2,RALB,SESN1,SUV39H1,TP53,PRKAA2
GO:BP	macromolecule localization	GO:0033036	0.00111036	2.95454	3211	219	62	21017	ABCC8,ADRA2A,AKT2,APOE,ATG3,ATR,BAG3,BAG4,BCL2,BDNF,BECN1,BNIP3L,CDKN1A,CLSTN1,CSK,DAB2,DLG4,EP300,FABP5,GSN,HSPB1,LAMP1,LAMP2,MDM2,MSN,NGFR,NLGN1,NPTX1,OPTN,PAK1,PEX14,PIK3CA,PRKACA,RAB6B,RAB7A,RELN,RPA1,S100A10,SIN3A,SOX9,SPP1,TNFRSF1A,TP53,TRPM4,VPS4A,ABL1,ADCYAP1,APC,CACNB4,CLU,CNR1,CPT1B,DRD2,HAP1,HCN1,ITPR1,PPP3CA,PRKAA2,PRKN,RYR2,SORL1,TSPO
GO:BP	endothelial cell migration	GO:0043542	0.00113671	2.94435	220	219	13	21017	APOE,GRN,HSPB1,LGMN,MEF2C,NFE2L2,NRP2,PIK3CA,RAC1,RHOA,ABL1,FGF2,HDAC7
GO:BP	negative regulation of locomotion	GO:0040013	0.00117013	2.93177	339	219	16	21017	ABCC8,APOE,BCL2,CLIC4,CNN2,HDAC1,MEF2C,NFE2L2,NGFR,RAC1,RHOA,SIN3A,TET1,DRD2,FGF2,PTPRR
GO:BP	response to vitamin	GO:0033273	0.00121406	2.91576	94	219	9	21017	BECN1,DNMT3A,KDM6A,MDM2,SETDB1,SOD2,SPP1,BCHE,TSPO
GO:BP	negative regulation of cell cycle phase transition	GO:1901988	0.00121805	2.91434	259	219	14	21017	ATR,BCL2,CASP2,CDKN1A,DOT1L,MDM2,MRE11,RAD50,RAD9A,TP53,VPS4A,APC,CACNB4,CCND1
GO:BP	glucose homeostasis	GO:0042593	0.00121805	2.91434	259	219	14	21017	ABCC8,ADRA2A,FABP5,NGFR,NPTX1,PIK3CA,PRKACA,SIN3A,TRPM4,CNR1,CRTC2,DBH,PPP3CA,PRKAA2
GO:BP	regulation of cell cycle process	GO:0010564	0.00123268	2.90915	724	219	24	21017	ATR,BCL2,BECN1,CASP2,CDKN1A,DOT1L,KAT2A,KAT2B,MDM2,MRE11,NCAPH,RAD50,RAD51B,RAD51C,RAD9A,RHOA,SIN3A,SOX9,TP53,VPS4A,APC,CACNB4,CCND1,DRD2
GO:BP	monoatomic cation transmembrane transport	GO:0098655	0.00124495	2.90485	832	219	26	21017	ABCC8,ADRA2A,ATG5,BCL2,COX5B,GRIN2B,PRKACA,SLC17A6,SLC6A1,TRPM4,ABL1,AMIGO1,ATP6V0E1,CACNA1C,CACNB4,CHRNA7,DRD2,FGF12,FGF2,HAP1,HCN1,ITPR1,PPP3CA,RYR1,RYR2,SLC12A5
GO:BP	carbohydrate homeostasis	GO:0033500	0.00127565	2.89427	260	219	14	21017	ABCC8,ADRA2A,FABP5,NGFR,NPTX1,PIK3CA,PRKACA,SIN3A,TRPM4,CNR1,CRTC2,DBH,PPP3CA,PRKAA2
GO:BP	regulation of cellular pH	GO:0030641	0.0013291	2.87644	95	219	9	21017	BCL2,CLIC4,GRN,LACC1,LAMP1,LAMP2,RAB7A,ATP6V0E1,SLC12A5
GO:BP	immune response-activating signaling pathway	GO:0002757	0.00134359	2.87173	477	219	19	21017	BCL2,BECN1,CD47,CD8A,CSK,EP300,EPG5,IRAK2,LACC1,LAMP2,MEF2C,PAK1,PIK3CA,RIPK2,TARBP2,ABL1,CACNB4,MAPKAPK2,NAGLU
GO:BP	regulation of supramolecular fiber organization	GO:1902903	0.00135099	2.86935	386	219	17	21017	APOE,BAG4,CD47,COTL1,GSN,PAK1,PIK3CA,RAC1,RHOA,S100A10,STMN1,ABL1,APC,ARHGEF10,CHRNA7,CLU,PRKN
GO:BP	response to amine	GO:0014075	0.00143579	2.84291	49	219	7	21017	GRIA1,HPRT1,NQO1,DBH,DRD2,NR4A2,PPP3CA
GO:BP	calcium ion transport	GO:0006816	0.001451	2.83833	433	219	18	21017	ADRA2A,ATG5,BCL2,GRIN2B,PRKACA,TRPM4,ABL1,CACNA1C,CACNB4,CHRNA7,DRD2,FGF2,HAP1,ITPR1,PPP3CA,RYR1,RYR2,TSPO
GO:BP	multicellular organism growth	GO:0035264	0.00151804	2.81872	156	219	11	21017	BCL2,CLIC4,EP300,KAT2A,KDM6A,LGMN,PIK3CA,TP53,DRD2,SLC12A5,TAF10
GO:BP	positive regulation of programmed necrotic cell death	GO:0062100	0.00155422	2.80849	8	219	4	21017	CASP6,RIPK1,TP53,TSPO
GO:BP	negative regulation of kinase activity	GO:0033673	0.00172299	2.76372	158	219	11	21017	APOE,CDKN1A,DUSP7,HSPB1,PRKAR2A,PRKAR2B,TARBP2,ABL1,AKT1S1,APC,PRKN
GO:BP	mismatch repair	GO:0006298	0.00172756	2.76257	32	219	6	21017	LIG1,PCNA,RPA1,ABL1,MUTYH,PRKCG
GO:BP	regulation of programmed necrotic cell death	GO:0062098	0.00172756	2.76257	32	219	6	21017	CASP6,RIPK1,TP53,MUTYH,PRKN,TSPO
GO:BP	protein targeting to lysosome	GO:0006622	0.00172756	2.76257	32	219	6	21017	BECN1,LAMP2,RAB7A,VPS4A,CLU,SORL1
GO:BP	brain development	GO:0007420	0.0017724	2.75144	739	219	24	21017	BCL2,BMI1,BNIP3,GRIA1,GRIN2B,HDAC1,HPRT1,KAT2A,MAFB,NRP2,RELN,RHOA,SIN3A,TP53,ABL1,AMIGO1,APAF1,CNTN1,DRD2,FGF2,HAP1,NAGLU,NES,NR4A2
GO:BP	release of sequestered calcium ion into cytosol	GO:0051209	0.00177772	2.75014	127	219	10	21017	ATG5,PRKACA,ABL1,CACNA1C,DRD2,FGF2,HAP1,ITPR1,RYR1,RYR2
GO:BP	DNA-templated transcription	GO:0006351	0.00178824	2.74757	3559	219	66	21017	APOE,ATF3,BMI1,CKS1B,DAB2,DNMT3A,DOT1L,EHMT2,EP300,EPCAM,HDAC1,IRAK2,JUN,KAT2A,KAT2B,KDM5C,KDM6A,KMT2C,MAFB,MAFF,MDM2,MEF2C,NFE2L2,NGFR,PCNA,PEX14,PRKCQ,PTMS,RELB,RELN,RHOA,RIPK1,RIPK2,S100A10,SIN3A,SOD2,SOX9,SPP1,SUV39H1,SUV39H2,TET1,TNFRSF1A,TP53,ABL1,ACTN1,ADCYAP1,CAMK4,CCND1,CLU,COL4A2,CRTC2,CXXC1,DRD2,FGF2,HDAC7,HGF,NKX6-2,NR4A2,POLR2J,PPP3CA,PRKN,SMN1,TAF10,TENM2,TF,USP21
GO:BP	negative regulation of amyloid-beta formation	GO:1902430	0.00180075	2.74455	18	219	5	21017	APOE,CHRNA7,CLU,HAP1,SORL1
GO:BP	actin filament bundle assembly	GO:0051017	0.00183431	2.73653	159	219	11	21017	BAG4,CD47,PAK1,RAC1,RHOA,S100A10,STMN1,ABL1,ACTN1,ARHGEF10,PRKN
GO:BP	negative regulation of G1/S transition of mitotic cell cycle	GO:2000134	0.00183801	2.73565	73	219	8	21017	BCL2,CASP2,CDKN1A,MDM2,TP53,APC,CACNB4,CCND1
GO:BP	cellular response to glucose starvation	GO:0042149	0.00190126	2.72096	51	219	7	21017	BCL2,BECN1,NFE2L2,SESN1,SUV39H1,TP53,PRKAA2
GO:BP	peptidyl-amino acid modification	GO:0018193	0.00190355	2.72043	742	219	24	21017	ATR,BAG4,BCL2,BDNF,DLG4,EHMT2,EP300,KAT2A,KAT2B,MDM2,PAK1,PRKACA,RELN,RIPK1,RIPK2,TNFRSF1A,TP53,TRPM4,ABL1,HDAC7,HGF,MAPKAPK2,NTF3,PRKAA2
GO:BP	negative regulation of sequestering of calcium ion	GO:0051283	0.00191101	2.71874	128	219	10	21017	ATG5,PRKACA,ABL1,CACNA1C,DRD2,FGF2,HAP1,ITPR1,RYR1,RYR2
GO:BP	cell adhesion	GO:0007155	0.00193023	2.71439	1511	219	37	21017	BAG4,BCL2,BMI1,CD47,CD83,CLSTN1,CSK,DAB2,DLG4,DOCK1,EPCAM,HSPB1,JAM2,MSN,NLGN1,NRP2,PIK3CA,PRKCQ,RAC1,RELN,RHOA,RIPK2,S100A10,SOX9,SPP1,ABL1,ACTN1,AMIGO1,APC,CNTN1,EGFL7,ITGA7,MMP2,NEGR1,PPP3CA,RASGRP1,TENM2
GO:BP	muscle cell differentiation	GO:0042692	0.0019893	2.7013	397	219	17	21017	ASB2,ATG5,BCL2,BDNF,DOCK1,JAM2,KAT2A,MDM2,MEF2C,MYORG,SOD2,SOX9,ACTN1,CACNB4,NAGLU,PPP3CA,RYR1
GO:BP	negative regulation of protein phosphorylation	GO:0001933	0.0020013	2.69869	270	219	14	21017	APOE,CDKN1A,DUSP7,HSPB1,PRKAR2A,PRKAR2B,TARBP2,ABL1,AKT1S1,APC,DRD2,HGF,NTF3,PRKN
GO:BP	striated muscle tissue development	GO:0014706	0.00205911	2.68632	398	219	17	21017	ASB2,ATF3,ATG5,BCL2,EP300,KAT2A,MAFF,MEF2C,MYORG,RHOA,ABL1,FGF2,NAGLU,PPP3CA,RYR1,RYR2,TAZ
GO:BP	cell cycle checkpoint signaling	GO:0000075	0.00214759	2.66805	196	219	12	21017	ATR,CASP2,CDKN1A,DOT1L,MDM2,MRE11,RAD50,RAD9A,TP53,VPS4A,APC,CCND1
GO:BP	negative regulation of mitotic cell cycle	GO:0045930	0.00217348	2.66284	233	219	13	21017	BCL2,CASP2,CDKN1A,MDM2,MRE11,RAD50,RAD9A,TP53,VPS4A,ABL1,APC,CACNB4,CCND1
GO:BP	vascular process in circulatory system	GO:0003018	0.00218452	2.66064	272	219	14	21017	ABCC8,ADRA2A,APOE,ATG5,FABP5,KAT2B,RHOA,SLC44A1,SLC6A1,SOD2,TRPM4,ABL1,DBH,MMP2
GO:BP	regulation of sequestering of calcium ion	GO:0051282	0.00220401	2.65679	130	219	10	21017	ATG5,PRKACA,ABL1,CACNA1C,DRD2,FGF2,HAP1,ITPR1,RYR1,RYR2
GO:BP	actin filament bundle organization	GO:0061572	0.00220723	2.65615	162	219	11	21017	BAG4,CD47,PAK1,RAC1,RHOA,S100A10,STMN1,ABL1,ACTN1,ARHGEF10,PRKN
GO:BP	regulation of actomyosin structure organization	GO:0110020	0.00223813	2.65011	101	219	9	21017	BAG4,CD47,PAK1,RAC1,RHOA,S100A10,STMN1,ABL1,ARHGEF10
GO:BP	positive regulation of proteolysis	GO:0045862	0.00228042	2.64199	234	219	13	21017	ADRA2A,APOE,DAB2,GRIN2B,GRN,GSN,LGMN,MDM2,NFE2L2,RIPK2,S100A10,CLU,PRKN
GO:BP	monoatomic cation transport	GO:0006812	0.00233397	2.6319	1032	219	29	21017	ABCC8,ADRA2A,ATG5,BCL2,COX5B,GRIN2B,PRKACA,SLC17A6,SLC6A1,TRPM4,ABL1,AMIGO1,ATP6V0E1,CACNA1C,CACNB4,CHRNA7,CNTN1,DRD2,FGF12,FGF2,HAP1,HCN1,ITPR1,PPP3CA,RYR1,RYR2,SLC12A5,TF,TSPO
GO:BP	regulation of calcium ion transmembrane transport	GO:1903169	0.00234557	2.62975	163	219	11	21017	ADRA2A,ATG5,BCL2,PRKACA,ABL1,CACNA1C,CACNB4,DRD2,HAP1,PPP3CA,RYR2
GO:BP	negative regulation of amyloid precursor protein catabolic process	GO:1902992	0.00242319	2.61561	19	219	5	21017	APOE,CHRNA7,CLU,HAP1,SORL1
GO:BP	positive regulation of cell differentiation	GO:0045597	0.00262835	2.58032	866	219	26	21017	BCL2,BDNF,CD83,DAB2,HDAC1,KAT2A,MDM2,MEF2C,RELN,RHOA,RIPK1,RIPK2,SIN3A,SOD2,SOX9,TMEM64,TRPM4,AMIGO1,DRD2,FGF2,HAP1,HGF,NKX6-2,PPP3CA,RASGRP1,TSPO
GO:BP	ERK1 and ERK2 cascade	GO:0070371	0.00267932	2.57198	318	219	15	21017	APOE,ATF3,CSK,DAB2,DUSP7,RIPK2,SOX9,ABL1,ADCYAP1,CHRNA7,DRD2,FGF2,PTPRR,RASGRP1,TF
GO:BP	sequestering of calcium ion	GO:0051208	0.00290962	2.53616	134	219	10	21017	ATG5,PRKACA,ABL1,CACNA1C,DRD2,FGF2,HAP1,ITPR1,RYR1,RYR2
GO:BP	regulation of RNA biosynthetic process	GO:2001141	0.00291473	2.5354	3454	219	64	21017	APOE,ATF3,BMI1,CKS1B,DAB2,DNMT3A,DOT1L,EHMT2,EP300,EPCAM,HDAC1,IRAK2,JUN,KAT2A,KAT2B,KDM5C,KDM6A,KMT2C,MAFB,MAFF,MDM2,MEF2C,NFE2L2,NGFR,PCNA,PEX14,PRKCQ,PTMS,RELB,RELN,RHOA,RIPK1,RIPK2,S100A10,SETDB1,SIN3A,SOD2,SOX9,SPP1,SUV39H1,SUV39H2,TET1,TNFRSF1A,TP53,ABL1,ACTN1,ADCYAP1,CAMK4,CCND1,CLU,CRTC2,CXXC1,DRD2,FGF2,HDAC7,HGF,NKX6-2,NR4A2,PPP3CA,PRKN,TAF10,TENM2,TF,USP21
GO:BP	negative regulation of developmental process	GO:0051093	0.00294105	2.5315	928	219	27	21017	ABCC8,BCL2,BDNF,BNIP3,CDKN1A,HDAC1,LGMN,MAFB,NFE2L2,NGFR,NLGN1,SIN3A,SOD2,SOX9,SPP1,TET1,TMEM64,TP53,TRPM4,CCND1,COL4A2,HDAC7,NKX6-2,PPP3CA,PRKN,SORL1,TSPO
GO:BP	regulation of pH	GO:0006885	0.00310687	2.50768	105	219	9	21017	BCL2,CLIC4,GRN,LACC1,LAMP1,LAMP2,RAB7A,ATP6V0E1,SLC12A5
GO:BP	negative regulation of secretion	GO:0051048	0.00315811	2.50057	168	219	11	21017	ABCC8,ADRA2A,APOE,RAB7A,TNFRSF1A,CNR1,DRD2,PNKD,PPP3CA,PRKN,TSPO
GO:BP	release of cytochrome c from mitochondria	GO:0001836	0.00321688	2.49257	55	219	7	21017	BCL2,BNIP3,SOD2,TP53,CLU,HGF,PRKN
GO:BP	regulation of synapse organization	GO:0050807	0.00331936	2.47895	242	219	13	21017	APOE,BDNF,CLSTN1,GRIN2B,MEF2C,NLGN1,NRP2,RELN,RHOA,ABL1,AMIGO1,DRD2,NEGR1
GO:BP	response to carbohydrate	GO:0009743	0.00331936	2.47895	242	219	13	21017	ABCC8,ADRA2A,NPTX1,NQO1,PIK3CA,PRKACA,SIN3A,SLC6A1,SOD2,TRPM4,NAGLU,PPP3CA,PRKAA2
GO:BP	regulation of monoatomic cation transmembrane transport	GO:1904062	0.00334579	2.4755	282	219	14	21017	ADRA2A,ATG5,BCL2,GRIN2B,PRKACA,ABL1,AMIGO1,CACNA1C,CACNB4,DRD2,FGF12,HAP1,PPP3CA,RYR2
GO:BP	positive regulation of endothelial cell migration	GO:0010595	0.00336475	2.47305	106	219	9	21017	GRN,HSPB1,LGMN,NFE2L2,NRP2,RAC1,ABL1,FGF2,HDAC7
GO:BP	negative regulation of cell cycle G1/S phase transition	GO:1902807	0.00338133	2.47091	79	219	8	21017	BCL2,CASP2,CDKN1A,MDM2,TP53,APC,CACNB4,CCND1
GO:BP	regulation of synaptic transmission, glutamatergic	GO:0051966	0.00338133	2.47091	79	219	8	21017	GRIN2B,GRM2,GRM3,MEF2C,NLGN1,RELN,CNR1,DRD2
GO:BP	DNA replication	GO:0006260	0.00348789	2.45744	283	219	14	21017	ADRA2A,ATR,CDKN1A,EHMT2,LIG1,MCM6,MRE11,PCNA,POLE,PTMS,RAD50,RPA1,SIN3A,TP53
GO:BP	regulation of RNA metabolic process	GO:0051252	0.00368689	2.43334	3709	219	67	21017	APOE,ATF3,BAG4,BMI1,CKS1B,DAB2,DNMT3A,DOT1L,EHMT2,EIF1,EP300,EPCAM,HDAC1,IRAK2,JUN,KAT2A,KAT2B,KDM5C,KDM6A,KMT2C,MAFB,MAFF,MDM2,MEF2C,NFE2L2,NGFR,PCNA,PEX14,PRKCQ,PTMS,RELB,RELN,RHOA,RIPK1,RIPK2,S100A10,SETDB1,SIN3A,SOD2,SOX9,SPP1,SUV39H1,SUV39H2,TET1,TNFRSF1A,TP53,ABL1,ACTN1,ADCYAP1,CAMK4,CCND1,CLU,CRTC2,CXXC1,DRD2,FGF2,HDAC7,HGF,MAPKAPK2,NKX6-2,NR4A2,PPP3CA,PRKN,TAF10,TENM2,TF,USP21
GO:BP	vacuolar transport	GO:0007034	0.00375627	2.42524	171	219	11	21017	BECN1,EPG5,GRN,IGF2R,LAMP1,LAMP2,RAB7A,VPS4A,CLU,PRKN,SORL1
GO:BP	regulation of nervous system development	GO:0051960	0.00376855	2.42383	463	219	18	21017	ABCC8,BDNF,CLSTN1,HDAC1,JAM2,NLGN1,RELN,S100A10,SPP1,TP53,AMIGO1,DRD2,FGF2,HAP1,NKX6-2,PPP3CA,SORL1,TSPO
GO:BP	epigenetic regulation of gene expression	GO:0040029	0.00380625	2.4195	245	219	13	21017	BMI1,DNMT3A,DOT1L,EP300,HDAC1,KAT2B,PIK3CA,SIN3A,SUV39H1,SUV39H2,TET1,TP53,USP21
GO:BP	contractile actin filament bundle assembly	GO:0030038	0.00393634	2.40491	108	219	9	21017	BAG4,CD47,PAK1,RAC1,RHOA,S100A10,STMN1,ABL1,ARHGEF10
GO:BP	long-term synaptic potentiation	GO:0060291	0.00393634	2.40491	108	219	9	21017	APOE,GRIN2B,LGMN,RELN,ABL1,CALB2,CHRNA7,DRD2,PRKCG
GO:BP	stress fiber assembly	GO:0043149	0.00393634	2.40491	108	219	9	21017	BAG4,CD47,PAK1,RAC1,RHOA,S100A10,STMN1,ABL1,ARHGEF10
GO:BP	positive regulation of neuron apoptotic process	GO:0043525	0.00411783	2.38533	57	219	7	21017	CASP2,GRN,NQO1,RIPK1,TP53,ABL1,MMP2
GO:BP	negative regulation of phagocytosis	GO:0050765	0.00416911	2.37996	21	219	5	21017	ATG3,ATG5,CD47,CNN2,CSK
GO:BP	negative regulation of intrinsic apoptotic signaling pathway	GO:2001243	0.00425222	2.37138	109	219	9	21017	BCL2,HDAC1,HSPB1,KDM6A,MDM2,NFE2L2,SOD2,CLU,PRKN
GO:BP	negative regulation of phosphorylation	GO:0042326	0.00428252	2.3683	288	219	14	21017	APOE,CDKN1A,DUSP7,HSPB1,PRKAR2A,PRKAR2B,TARBP2,ABL1,AKT1S1,APC,DRD2,HGF,NTF3,PRKN
GO:BP	regulation of cytoskeleton organization	GO:0051493	0.00442534	2.35405	517	219	19	21017	BAG4,CD47,CLIC4,COTL1,GSN,KAT2A,KAT2B,PAK1,PIK3CA,RAC1,RHOA,S100A10,STMN1,ABL1,APC,ARHGEF10,NES,PRKAA2,PRKN
GO:BP	skeletal muscle tissue development	GO:0007519	0.0044517	2.35147	174	219	11	21017	ASB2,ATF3,BCL2,EP300,MAFF,MEF2C,MYORG,RHOA,PPP3CA,RYR1,TAZ
GO:BP	positive regulation of supramolecular fiber organization	GO:1902905	0.00470736	2.32722	175	219	11	21017	APOE,BAG4,CD47,GSN,PAK1,RAC1,RHOA,S100A10,ABL1,ARHGEF10,CLU
GO:BP	immune response-regulating cell surface receptor signaling pathway	GO:0002768	0.00491245	2.3087	334	219	15	21017	BCL2,CD47,CD8A,CSK,EP300,IRAK2,MAP3K1,MEF2C,PAK1,PIK3CA,PRKCQ,RIPK2,ABL1,CACNB4,NAGLU
GO:BP	maintenance of location	GO:0051235	0.00491245	2.3087	334	219	15	21017	APOE,ATG5,GSN,PRKACA,ABL1,CACNA1C,DRD2,FGF2,HAP1,ITPR1,NAGLU,RYR1,RYR2,SORL1,TSPO
GO:BP	regulation of purine nucleotide metabolic process	GO:1900542	0.00493305	2.30688	83	219	8	21017	EP300,KAT2B,LACC1,PRKACA,TP53,PRKAA2,TAZ,TSPO
GO:BP	fibroblast proliferation	GO:0048144	0.00494999	2.3054	111	219	9	21017	BMI1,CDKN1A,CKS1B,KAT2A,NGFR,PRDX1,SOD2,TP53,ABL1
GO:BP	positive regulation of response to biotic stimulus	GO:0002833	0.00502187	2.29913	379	219	16	21017	BECN1,CASP6,EP300,EPG5,GRN,IRAK2,LACC1,LAMP1,LAMP2,PAK1,RIPK2,SIN3A,TARBP2,MAPKAPK2,NAGLU,RASGRP1
GO:BP	regulation of DNA-templated transcription	GO:0006355	0.00518663	2.28512	3435	219	63	21017	APOE,ATF3,BMI1,CKS1B,DAB2,DNMT3A,DOT1L,EHMT2,EP300,EPCAM,HDAC1,IRAK2,JUN,KAT2A,KAT2B,KDM5C,KDM6A,KMT2C,MAFB,MAFF,MDM2,MEF2C,NFE2L2,NGFR,PCNA,PEX14,PRKCQ,PTMS,RELB,RELN,RHOA,RIPK1,RIPK2,S100A10,SIN3A,SOD2,SOX9,SPP1,SUV39H1,SUV39H2,TET1,TNFRSF1A,TP53,ABL1,ACTN1,ADCYAP1,CAMK4,CCND1,CLU,CRTC2,CXXC1,DRD2,FGF2,HDAC7,HGF,NKX6-2,NR4A2,PPP3CA,PRKN,TAF10,TENM2,TF,USP21
GO:BP	positive regulation of protein catabolic process	GO:0045732	0.00538813	2.26856	214	219	12	21017	ADRA2A,APOE,DAB2,MDM2,MSN,NFE2L2,RAB7A,SOX9,APC,CLU,PRKN,SORL1
GO:BP	regulation of nucleotide metabolic process	GO:0006140	0.00540393	2.26729	84	219	8	21017	EP300,KAT2B,LACC1,PRKACA,TP53,PRKAA2,TAZ,TSPO
GO:BP	chromosome organization	GO:0051276	0.00565082	2.24789	628	219	21	21017	AGO4,ATR,BECN1,DOT1L,EHMT2,KAT2B,MCM6,MRE11,NCAPH,PCNA,PRKCQ,RAD50,RAD51C,RHOA,RPA1,SMC1A,TP53,VPS4A,ABL1,APC,ARHGEF10
GO:BP	response to antibiotic	GO:0046677	0.00585278	2.23264	39	219	6	21017	CRIP1,EHMT2,GRIA1,MDM2,MEF2C,TP53
GO:BP	negative regulation of transferase activity	GO:0051348	0.00618868	2.2084	180	219	11	21017	APOE,CDKN1A,DUSP7,HSPB1,PRKAR2A,PRKAR2B,TARBP2,ABL1,AKT1S1,APC,PRKN
GO:BP	cellular response to radiation	GO:0071478	0.00618868	2.2084	180	219	11	21017	AKT2,ATR,CDKN1A,CRIP1,EP300,KDM4D,MDM2,PCNA,RAD9A,TP53,MMP2
GO:BP	leukocyte differentiation	GO:0002521	0.00623806	2.20495	632	219	21	21017	ATG5,BCL2,BMI1,CD83,CD8A,EP300,KAT2A,MAFB,RELB,RHOA,RIPK1,RIPK2,TMEM64,TP53,TPD52,ABL1,CAMK4,NAGLU,PPP3CA,RASGRP1,TF
GO:BP	muscle system process	GO:0003012	0.00624595	2.2044	432	219	17	21017	ABCC8,ADRA2A,ASB2,BECN1,GSN,PIK3CA,PRKACA,RHOA,TNFRSF1A,TRPM4,CACNA1C,DRD2,FGF12,PPP3CA,RYR1,RYR2,TAZ
GO:BP	mitotic cell cycle checkpoint signaling	GO:0007093	0.00633539	2.19823	146	219	10	21017	CASP2,CDKN1A,MDM2,MRE11,RAD50,RAD9A,TP53,VPS4A,APC,CCND1
GO:BP	regulation of cell cycle phase transition	GO:1901987	0.0064419	2.19099	433	219	17	21017	ATR,BCL2,CASP2,CDKN1A,DOT1L,MDM2,MRE11,RAD50,RAD51B,RAD51C,RAD9A,SIN3A,TP53,VPS4A,APC,CACNB4,CCND1
GO:BP	cellular component disassembly	GO:0022411	0.00664337	2.17761	434	219	17	21017	ABCC8,ATG5,ATR,BECN1,BNIP3,EPG5,GSN,LAMP2,PEX14,PIK3CA,STMN1,VPS4A,APAF1,APC,MMP2,NES,PRKAA2
GO:BP	negative regulation of amide metabolic process	GO:0034249	0.0067779	2.16891	23	219	5	21017	APOE,CHRNA7,CLU,HAP1,SORL1
GO:BP	regulation of proteolysis	GO:0030162	0.0068505	2.16428	435	219	17	21017	ADRA2A,APOE,DAB2,GRIN2B,GRN,GSN,HDAC1,LGMN,MDM2,NFE2L2,PRKACA,RIPK2,S100A10,TP53,CLU,PRKCG,PRKN
GO:BP	negative regulation of mitotic cell cycle phase transition	GO:1901991	0.00688685	2.16198	182	219	11	21017	BCL2,CASP2,CDKN1A,MDM2,MRE11,RAD50,TP53,VPS4A,APC,CACNB4,CCND1
GO:BP	regulation of tube diameter	GO:0035296	0.00760593	2.11885	149	219	10	21017	ADRA2A,APOE,ATG5,KAT2B,RHOA,SOD2,TRPM4,ABL1,DBH,MMP2
GO:BP	adult behavior	GO:0030534	0.00760593	2.11885	149	219	10	21017	EHMT2,GRM2,CACNB4,DBH,DRD2,FGF12,GABRG2,NAGLU,NR4A2,PRKN
GO:BP	negative regulation of protein kinase activity	GO:0006469	0.00760593	2.11885	149	219	10	21017	APOE,CDKN1A,DUSP7,HSPB1,PRKAR2A,PRKAR2B,TARBP2,ABL1,AKT1S1,APC
GO:BP	blood vessel diameter maintenance	GO:0097746	0.00760593	2.11885	149	219	10	21017	ADRA2A,APOE,ATG5,KAT2B,RHOA,SOD2,TRPM4,ABL1,DBH,MMP2
GO:BP	cellular response to transforming growth factor beta stimulus	GO:0071560	0.00763872	2.11698	261	219	13	21017	DAB2,EP300,HDAC1,JUN,KDM6A,MEF2C,SIN3A,SOX9,TET1,TP53,ABL1,APAF1,COL4A2
GO:BP	regulation of hormone secretion	GO:0046883	0.00763872	2.11698	261	219	13	21017	ABCC8,ADRA2A,DAB2,PRKACA,SPP1,TRPM4,ADCYAP1,CNR1,DRD2,ITPR1,PPP3CA,PRKN,TSPO
GO:BP	regulation of cell cycle G2/M phase transition	GO:1902749	0.00766592	2.11544	117	219	9	21017	CDKN1A,MRE11,RAD50,RAD51B,RAD51C,SIN3A,TP53,VPS4A,CCND1
GO:BP	animal organ morphogenesis	GO:0009887	0.00779925	2.10795	1037	219	28	21017	ASB2,BCL2,BMI1,CRIP1,CYP7B1,EP300,HDAC1,KDM6A,MAFB,MDM2,MEF2C,MSN,NGFR,NRP2,RHOA,SOX9,TP53,APC,FGF2,HCN1,HGF,MMP2,NAGLU,PPP3CA,RYR1,RYR2,TAF10,TAZ
GO:BP	dopamine metabolic process	GO:0042417	0.00792713	2.10088	41	219	6	21017	HPRT1,DBH,DRD2,NR4A2,PNKD,PRKN
GO:BP	actin filament-based process	GO:0030029	0.00796317	2.09891	806	219	24	21017	ADRA2A,ASB2,BAG4,BCL2,CD47,CNN2,COTL1,GSN,PAK1,PIK3CA,RAC1,RHOA,S100A10,STMN1,TRPM4,VPS4A,ABL1,ACTN1,ARHGEF10,CACNA1C,FGF12,PRKN,RYR2,TF
GO:BP	response to alcohol	GO:0097305	0.00796452	2.09884	262	219	13	21017	CDKN1A,DNMT3A,EHMT2,GRIN2B,MDM2,NQO1,SETDB1,SOD2,CNR1,DBH,DRD2,PRKAA2,TSPO
GO:BP	regulation of tube size	GO:0035150	0.00807592	2.09281	150	219	10	21017	ADRA2A,APOE,ATG5,KAT2B,RHOA,SOD2,TRPM4,ABL1,DBH,MMP2
GO:BP	exocytosis	GO:0006887	0.00810592	2.0912	348	219	15	21017	ADRA2A,LAMP1,NLGN1,PAK1,RAB7A,RALB,S100A10,SYP,TSPAN18,VPS4A,CACNB4,HAP1,PRKCG,PRKN,RASGRP1
GO:BP	skeletal muscle organ development	GO:0060538	0.0084928	2.07095	186	219	11	21017	ASB2,ATF3,BCL2,EP300,MAFF,MEF2C,MYORG,RHOA,PPP3CA,RYR1,TAZ
GO:BP	regulation of MAPK cascade	GO:0043408	0.00855089	2.06799	645	219	21	21017	ADRA2A,APOE,ATF3,CSK,DAB2,DUSP7,MEF2C,PAK1,PRDX1,RIPK1,RIPK2,ABL1,ADCYAP1,CHRNA7,DRD2,FGF2,HGF,NTF3,PRKN,PTPRR,RASGRP1
GO:BP	regulation of organelle assembly	GO:1902115	0.00863203	2.06389	224	219	12	21017	ATG3,ATG5,BECN1,EHMT2,GSN,KAT2A,KAT2B,MSN,RALB,RHOA,HAP1,PRKAA2
GO:BP	canonical NF-kappaB signal transduction	GO:0007249	0.00865318	2.06282	306	219	14	21017	EP300,HDAC1,HSPB1,IRAK2,OPTN,PRDX1,RELB,RHOA,RIPK1,RIPK2,TNFRSF10B,TNFRSF1A,ABL1,PRKN
GO:BP	regulation of DNA metabolic process	GO:0051052	0.00879719	2.05566	492	219	18	21017	ATR,CDKN1A,EHMT2,KAT2A,KAT2B,KDM4D,MCM6,MRE11,PCNA,PRKCQ,RAD50,TP53,ABL1,APAF1,FGF2,HGF,PRKCG,TAF10
GO:BP	vasculature development	GO:0001944	0.00882605	2.05423	755	219	23	21017	ABCC8,APOE,CD47,CLIC4,GRN,HSPB1,MDM2,MEF2C,NFE2L2,NGFR,NRP2,PIK3CA,RHOA,SOD2,TSPAN18,ABL1,CHRNA7,COL4A2,EGFL7,FGF2,HDAC7,MMP2,NAGLU
GO:BP	regulation of monoatomic ion transmembrane transporter activity	GO:0032412	0.0089421	2.04856	187	219	11	21017	ADRA2A,DLG4,MEF2C,NLGN1,PRKACA,RELN,CACNB4,DRD2,FGF12,HAP1,RYR2
GO:BP	glucose metabolic process	GO:0006006	0.0089421	2.04856	187	219	11	21017	AKT2,ATF3,EP300,FABP5,KAT2A,KAT2B,PIK3CA,PRKACA,TP53,CRTC2,PRKN
GO:BP	cellular response to peptide hormone stimulus	GO:0071375	0.00898416	2.04652	307	219	14	21017	AKT2,CSK,GRIA1,KAT2B,KDM6A,MDM2,NFE2L2,PIK3CA,PRKACA,PRKCQ,APC,NR4A2,PPP3CA,SORL1
GO:BP	cellular response to UV	GO:0034644	0.00910825	2.04056	90	219	8	21017	ATR,CDKN1A,CRIP1,EP300,MDM2,PCNA,TP53,MMP2
GO:BP	negative regulation of catabolic process	GO:0009895	0.00930869	2.03111	352	219	15	21017	ADRA2A,BCL2,BECN1,EHMT2,EP300,NQO1,PIK3CA,PRKACA,TP53,CNR1,HGF,MAPKAPK2,PRKCG,SORL1,TSPO
GO:BP	positive regulation of autophagy	GO:0010508	0.00964032	2.01591	153	219	10	21017	BAG3,BECN1,BNIP3,BNIP3L,OPTN,RALB,RIPK2,SESN1,PRKAA2,PRKN
GO:BP	regulation of intracellular pH	GO:0051453	0.00989757	2.00447	91	219	8	21017	BCL2,CLIC4,GRN,LAMP1,LAMP2,RAB7A,ATP6V0E1,SLC12A5
GO:BP	negative regulation of autophagy	GO:0010507	0.00989757	2.00447	91	219	8	21017	BCL2,BECN1,EHMT2,EP300,PIK3CA,TP53,HGF,TSPO
GO:BP	regulation of mitotic cell cycle	GO:0007346	0.010113	1.99512	497	219	18	21017	BCL2,CASP2,CDKN1A,CKS1B,LGMN,MDM2,MRE11,RAD50,RAD51B,RAD51C,RAD9A,SIN3A,TP53,VPS4A,ABL1,APC,CACNB4,CCND1
GO:BP	negative regulation of transcription by RNA polymerase II	GO:0000122	0.0101872	1.99194	992	219	27	21017	ATF3,BMI1,DAB2,DNMT3A,EHMT2,EP300,HDAC1,JUN,KAT2A,KAT2B,MAFB,MAFF,MDM2,MEF2C,PCNA,SIN3A,SOX9,SUV39H1,SUV39H2,TET1,TP53,CCND1,HDAC7,NKX6-2,NR4A2,PRKN,TENM2
GO:BP	response to transforming growth factor beta	GO:0071559	0.0101909	1.99179	268	219	13	21017	DAB2,EP300,HDAC1,JUN,KDM6A,MEF2C,SIN3A,SOX9,TET1,TP53,ABL1,APAF1,COL4A2
GO:BP	response to UV	GO:0009411	0.0102171	1.99067	154	219	10	21017	ATR,BCL2,CDKN1A,CRIP1,EP300,MDM2,PCNA,TP53,CCND1,MMP2
GO:BP	cell cycle G2/M phase transition	GO:0044839	0.0102171	1.99067	154	219	10	21017	CDKN1A,MRE11,RAD50,RAD51B,RAD51C,SIN3A,TP53,VPS4A,CCND1,NES
GO:BP	regulation of exocytosis	GO:0017157	0.0104171	1.98225	190	219	11	21017	ADRA2A,LAMP1,NLGN1,RAB7A,S100A10,SYP,VPS4A,CACNB4,HAP1,PRKCG,PRKN
GO:BP	protein deacetylation	GO:0006476	0.010563	1.97621	43	219	6	21017	EP300,HDAC1,KAT2A,KAT2B,HDAC7,PRKAA2
GO:BP	regulation of actin filament organization	GO:0110053	0.0106111	1.97424	269	219	13	21017	BAG4,CD47,COTL1,GSN,PAK1,PIK3CA,RAC1,RHOA,S100A10,STMN1,ABL1,ARHGEF10,PRKN
GO:BP	hepatocyte growth factor receptor signaling pathway	GO:0048012	0.0106357	1.97323	12	219	4	21017	PAK1,RAC1,STMN1,HGF
GO:BP	cellular response to antibiotic	GO:0071236	0.0106357	1.97323	12	219	4	21017	CRIP1,MDM2,MEF2C,TP53
GO:BP	positive regulation of innate immune response	GO:0045089	0.0106684	1.9719	356	219	15	21017	BECN1,CASP6,EP300,EPG5,IRAK2,LACC1,LAMP1,LAMP2,PAK1,RIPK2,SIN3A,TARBP2,MAPKAPK2,NAGLU,RASGRP1
GO:BP	regulation of blood vessel endothelial cell migration	GO:0043535	0.010744	1.96883	92	219	8	21017	APOE,HSPB1,MEF2C,NFE2L2,RHOA,ABL1,FGF2,HDAC7
GO:BP	T cell differentiation	GO:0030217	0.010814	1.96602	312	219	14	21017	ATG5,BCL2,BMI1,CD83,CD8A,KAT2A,MAFB,RELB,RHOA,RIPK2,TP53,ABL1,CAMK4,RASGRP1
GO:BP	cellular response to light stimulus	GO:0071482	0.0108238	1.96562	122	219	9	21017	AKT2,ATR,CDKN1A,CRIP1,EP300,MDM2,PCNA,TP53,MMP2
GO:BP	negative regulation of organelle organization	GO:0010639	0.0110349	1.95723	357	219	15	21017	BECN1,BNIP3,EHMT2,GSN,KAT2A,KAT2B,PIK3CA,RAB7A,RAD50,STMN1,TP53,APC,CLU,HGF,PRKN
GO:BP	membrane organization	GO:0061024	0.0111018	1.95461	822	219	24	21017	AKT2,APOE,ATR,BCL2,BECN1,BNIP3,BNIP3L,DLG4,DOCK1,GSN,MAFB,NLGN1,RAB7A,RAC1,RELN,RHOA,S100A10,SYP,TP53,VPS4A,CLU,PRKN,TAZ,TSPO
GO:BP	positive regulation of cell development	GO:0010720	0.0113854	1.94365	452	219	17	21017	BCL2,BDNF,CD83,HDAC1,RELN,RHOA,RIPK1,RIPK2,TMEM64,AMIGO1,DRD2,FGF2,HAP1,NKX6-2,PPP3CA,RASGRP1,TSPO
GO:BP	protein tetramerization	GO:0051262	0.011651	1.93364	93	219	8	21017	GRIN2B,HPRT1,SOD2,TP53,TRPM4,CRTC2,HCN1,RYR1
GO:BP	response to endoplasmic reticulum stress	GO:0034976	0.0118257	1.92717	231	219	12	21017	ATF3,BCL2,JUN,NFE2L2,TNFRSF10B,TP53,ABL1,APAF1,CCND1,CLU,ITPR1,PRKN
GO:BP	vacuole organization	GO:0007033	0.0123578	1.90806	232	219	12	21017	ATG3,ATG5,BAG3,BECN1,EHMT2,GRN,LAMP1,LAMP2,RAB7A,RALB,VPS4A,NAGLU
GO:BP	negative regulation of endocytosis	GO:0045806	0.0124017	1.90652	67	219	7	21017	ATG3,ATG5,CD47,CNN2,CSK,DLG4,RAC1
GO:BP	nitrogen compound transport	GO:0071705	0.0126351	1.89842	1909	219	41	21017	ABCC8,ADRA2A,APOE,ATG3,BAG3,BECN1,CD47,CDKN1A,CLSTN1,CSK,DAB2,EP300,EPG5,GRM2,HSPB1,LAMP2,MDM2,NGFR,OPTN,PEX14,PRKACA,RAB6B,RAB7A,RIPK1,SLC17A6,SLC44A1,SLC6A1,TP53,TRPM4,VPS4A,ADCYAP1,CACNB4,CLU,CNR1,DRD2,HAP1,ITPR1,PPP3CA,PRKN,SLC12A5,SORL1
GO:BP	response to ethanol	GO:0045471	0.0132086	1.87914	125	219	9	21017	DNMT3A,EHMT2,GRIN2B,NQO1,SETDB1,SOD2,CNR1,DBH,DRD2
GO:BP	ERBB signaling pathway	GO:0038127	0.0132086	1.87914	125	219	9	21017	ADRA2A,LGMN,PIK3CA,RAB7A,RALB,SOX9,ABL1,HAP1,PTPRR
GO:BP	striated muscle cell apoptotic process	GO:0010658	0.0138697	1.85793	45	219	6	21017	ATG5,BAG3,BNIP3,NFE2L2,TP53,APAF1
GO:BP	regulation of cell size	GO:0008361	0.0140163	1.85337	196	219	11	21017	APOE,BDNF,KDM6A,MSN,RAC1,RHOA,SIN3A,SPP1,ABL1,AKT1S1,SLC12A5
GO:BP	blood vessel development	GO:0001568	0.0153278	1.81452	725	219	22	21017	ABCC8,APOE,CD47,CLIC4,GRN,HSPB1,MDM2,MEF2C,NFE2L2,NGFR,NRP2,PIK3CA,RHOA,TSPAN18,ABL1,CHRNA7,COL4A2,EGFL7,FGF2,HDAC7,MMP2,NAGLU
GO:BP	embryonic morphogenesis	GO:0048598	0.0155956	1.807	617	219	20	21017	ASB2,BMI1,HDAC1,KAT2A,KDM6A,MAFB,MEF2C,PRKACA,SOX9,TP53,ABL1,APAF1,CACNA1C,COL4A2,FGF2,ITGA7,MMP2,NAGLU,RYR2,TAF10
GO:BP	base-excision repair	GO:0006284	0.0158124	1.801	46	219	6	21017	LIG1,NTHL1,PCNA,POLE,RPA1,MUTYH
GO:BP	nerve development	GO:0021675	0.0159549	1.79711	97	219	8	21017	BDNF,MAFB,NGFR,NPTX1,NRP2,NAGLU,NTF3,PRKCG
GO:BP	response to amino acid	GO:0043200	0.01603	1.79507	128	219	9	21017	DNMT3A,EP300,GRIA1,NQO1,PCNA,PIK3CA,SESN1,AMIGO1,MMP2
GO:BP	actin filament organization	GO:0007015	0.0160513	1.79449	464	219	17	21017	BAG4,BCL2,CD47,CNN2,COTL1,GSN,PAK1,PIK3CA,RAC1,RHOA,S100A10,STMN1,ABL1,ACTN1,ARHGEF10,PRKN,TF
GO:BP	positive regulation of lymphocyte activation	GO:0051251	0.016621	1.77934	324	219	14	21017	BCL2,BMI1,CD47,CD83,CDKN1A,CSK,MEF2C,PIK3CA,PRKCQ,RHOA,RIPK2,ABL1,PPP3CA,RASGRP1
GO:BP	positive regulation of hydrolase activity	GO:0051345	0.0167086	1.77706	239	219	12	21017	GRIN2B,GRN,LGMN,MEF2C,PCNA,RHOA,RIPK2,S100A10,ADCYAP1,ARHGEF10,NTF3,RASGRP1
GO:BP	regulation of protein stability	GO:0031647	0.0172112	1.76419	325	219	14	21017	BAG3,BAG4,BCL2,EP300,GRN,GSN,KAT2A,LAMP1,LAMP2,MDM2,TP53,CLU,PRKN,TF
GO:BP	regulation of tumor necrosis factor production	GO:0032680	0.0178404	1.7486	164	219	10	21017	ABCC8,CD47,HSPB1,RIPK1,RIPK2,CHRNA7,CLU,MAPKAPK2,RASGRP1,TSPO
GO:BP	tumor necrosis factor production	GO:0032640	0.0178404	1.7486	164	219	10	21017	ABCC8,CD47,HSPB1,RIPK1,RIPK2,CHRNA7,CLU,MAPKAPK2,RASGRP1,TSPO
GO:BP	protein targeting to vacuole	GO:0006623	0.0179698	1.74546	47	219	6	21017	BECN1,LAMP2,RAB7A,VPS4A,CLU,SORL1
GO:BP	regulation of protein catabolic process	GO:0042176	0.0180541	1.74342	372	219	15	21017	ADRA2A,APOE,DAB2,MDM2,MSN,NFE2L2,NQO1,PRKACA,RAB7A,SOX9,APC,CLU,PRKCG,PRKN,SORL1
GO:BP	regulation of calcium ion transport	GO:0051924	0.0181759	1.7405	241	219	12	21017	ADRA2A,ATG5,BCL2,PRKACA,ABL1,CACNA1C,CACNB4,DRD2,HAP1,PPP3CA,RYR2,TSPO
GO:BP	regulation of osteoblast differentiation	GO:0045667	0.0181846	1.7403	130	219	9	21017	MEF2C,PRKACA,SOX9,TMEM64,TRPM4,FGF2,HDAC7,HGF,PPP3CA
GO:BP	DNA damage checkpoint signaling	GO:0000077	0.0181846	1.7403	130	219	9	21017	ATR,CASP2,CDKN1A,DOT1L,MDM2,MRE11,RAD9A,TP53,CCND1
GO:BP	protein maturation	GO:0051604	0.0183945	1.73531	571	219	19	21017	BAG3,BAG4,CASP2,CASP6,EP300,GRN,GSN,HSPB1,KAT2B,LGMN,MAFB,MDM2,PRKACA,RIPK2,S100A10,BCHE,CLU,NAGLU,SORL1
GO:BP	regulation of neurotransmitter transport	GO:0051588	0.0185668	1.73126	99	219	8	21017	MEF2C,NLGN1,SYP,CACNB4,DRD2,PNKD,PRKCG,PRKN
GO:BP	regulation of cellular component size	GO:0032535	0.0198604	1.70201	375	219	15	21017	APOE,BAG4,BDNF,COTL1,GSN,KDM6A,MSN,PIK3CA,RAC1,RHOA,SIN3A,SPP1,ABL1,AKT1S1,SLC12A5
GO:BP	blood vessel morphogenesis	GO:0048514	0.0201883	1.6949	628	219	20	21017	ABCC8,APOE,CD47,CLIC4,GRN,HSPB1,NFE2L2,NGFR,NRP2,PIK3CA,RHOA,TSPAN18,ABL1,CHRNA7,COL4A2,EGFL7,FGF2,HDAC7,MMP2,NAGLU
GO:BP	protein catabolic process	GO:0030163	0.0213499	1.6706	973	219	26	21017	ADRA2A,APOE,ASB2,ATG5,BAG3,BNIP3,BNIP3L,DAB2,LAMP2,LGMN,MDM2,MSN,NFE2L2,NQO1,PRKACA,RAB7A,RIPK1,SOX9,VPS4A,APC,CLU,MMP2,NAGLU,PRKCG,PRKN,SORL1
GO:BP	actomyosin structure organization	GO:0031032	0.0214394	1.66879	205	219	11	21017	BAG4,CD47,CNN2,PAK1,RAC1,RHOA,S100A10,STMN1,VPS4A,ABL1,ARHGEF10
GO:BP	NMDA glutamate receptor clustering	GO:0097114	0.0219796	1.65798	5	219	3	21017	APOE,NLGN1,RELN
GO:BP	viral process	GO:0016032	0.0226175	1.64555	427	219	16	21017	APOE,ATG5,BCL2,BECN1,EP300,GSN,HDAC1,IGF2R,JUN,LAMP1,RAB7A,SETDB1,TARBP2,TP53,VPS4A,PRKN
GO:BP	regulation of mitotic cell cycle phase transition	GO:1901990	0.0226426	1.64507	333	219	14	21017	BCL2,CASP2,CDKN1A,MDM2,MRE11,RAD50,RAD51B,RAD51C,SIN3A,TP53,VPS4A,APC,CACNB4,CCND1
GO:BP	intracellular glucose homeostasis	GO:0001678	0.0232219	1.6341	169	219	10	21017	ABCC8,ADRA2A,NGFR,NPTX1,PIK3CA,PRKACA,SIN3A,TRPM4,PPP3CA,PRKAA2
GO:BP	regulation of tumor necrosis factor superfamily cytokine production	GO:1903555	0.0232219	1.6341	169	219	10	21017	ABCC8,CD47,HSPB1,RIPK1,RIPK2,CHRNA7,CLU,MAPKAPK2,RASGRP1,TSPO
GO:BP	tumor necrosis factor superfamily cytokine production	GO:0071706	0.0232219	1.6341	169	219	10	21017	ABCC8,CD47,HSPB1,RIPK1,RIPK2,CHRNA7,CLU,MAPKAPK2,RASGRP1,TSPO
GO:BP	peptidyl-serine phosphorylation	GO:0018105	0.0234902	1.62911	207	219	11	21017	ATR,BAG4,BCL2,BDNF,PAK1,PRKACA,RIPK1,RIPK2,HGF,MAPKAPK2,NTF3
GO:BP	mononuclear cell differentiation	GO:1903131	0.0236357	1.62643	529	219	18	21017	ATG5,BCL2,BMI1,CD83,CD8A,EP300,KAT2A,MAFB,RELB,RHOA,RIPK1,RIPK2,TP53,TPD52,ABL1,CAMK4,NAGLU,RASGRP1
GO:BP	activation of innate immune response	GO:0002218	0.023789	1.62362	290	219	13	21017	BECN1,CASP6,EP300,EPG5,IRAK2,LACC1,LAMP2,PAK1,RIPK2,SIN3A,TARBP2,MAPKAPK2,NAGLU
GO:BP	regulation of mitochondrial membrane potential	GO:0051881	0.0241286	1.61747	74	219	7	21017	BCL2,BNIP3,BNIP3L,SOD2,ABL1,PRKN,TSPO
GO:BP	heart valve development	GO:0003170	0.0241286	1.61747	74	219	7	21017	MDM2,MEF2C,RHOA,SOX9,TNFRSF1A,APC,NAGLU
GO:BP	epithelial tube morphogenesis	GO:0060562	0.0242174	1.61587	335	219	14	21017	ASB2,BCL2,CLIC4,KAT2A,KDM6A,MEF2C,PAK1,PRKACA,RHOA,SOX9,ABL1,APAF1,FGF2,RYR2
GO:BP	neurotransmitter transport	GO:0006836	0.024578	1.60945	208	219	11	21017	ABCC8,MEF2C,NLGN1,SLC17A6,SLC6A1,SYP,CACNB4,DRD2,PNKD,PRKCG,PRKN
GO:BP	positive regulation of monoatomic ion transport	GO:0043270	0.0257093	1.58991	209	219	11	21017	ABCC8,ADRA2A,RELN,ABL1,AMIGO1,CNTN1,FGF12,HAP1,PPP3CA,RYR2,TSPO
GO:BP	protein-containing complex disassembly	GO:0032984	0.0262687	1.58056	250	219	12	21017	ATG5,BECN1,BNIP3,EPG5,GSN,LAMP2,PEX14,PIK3CA,STMN1,VPS4A,APC,NES
GO:BP	regulation of behavior	GO:0050795	0.0263791	1.57874	75	219	7	21017	APOE,DLG4,MEF2C,NLGN1,RELN,CNR1,DRD2
GO:BP	regulation of G2/M transition of mitotic cell cycle	GO:0010389	0.0267182	1.57319	104	219	8	21017	CDKN1A,MRE11,RAD50,RAD51B,RAD51C,SIN3A,VPS4A,CCND1
GO:BP	negative regulation of small molecule metabolic process	GO:0062014	0.0267182	1.57319	104	219	8	21017	APOE,EP300,KAT2A,PRKACA,SOX9,TP53,CNR1,TSPO
GO:BP	positive regulation of secretion by cell	GO:1903532	0.0275115	1.56049	294	219	13	21017	ABCC8,DAB2,LAMP1,NLGN1,PRKACA,RAB7A,S100A10,SPP1,TRPM4,VPS4A,ADCYAP1,DRD2,ITPR1
GO:BP	response to steroid hormone	GO:0048545	0.0276603	1.55814	339	219	14	21017	BCL2,CDKN1A,CYP7B1,DAB2,EP300,HDAC1,MDM2,PAK1,PCNA,PIK3CA,RHOA,SPP1,BCHE,TSPO
GO:BP	regulation of generation of precursor metabolites and energy	GO:0043467	0.027787	1.55616	137	219	9	21017	AKT2,BNIP3,EP300,KAT2B,PIK3CA,PRKACA,RHOA,TP53,PRKAA2
GO:BP	positive regulation of apoptotic signaling pathway	GO:2001235	0.027787	1.55616	137	219	9	21017	ATF3,BECN1,CASP2,NGFR,RAD9A,RIPK1,TP53,APAF1,MMP2
GO:BP	G2/M transition of mitotic cell cycle	GO:0000086	0.027787	1.55616	137	219	9	21017	CDKN1A,MRE11,RAD50,RAD51B,RAD51C,SIN3A,VPS4A,CCND1,NES
GO:BP	regulation of cell junction assembly	GO:1901888	0.0281085	1.55116	211	219	11	21017	BDNF,CLSTN1,MEF2C,NLGN1,PRKACA,RAC1,RHOA,S100A10,ABL1,AMIGO1,NEGR1
GO:BP	chaperone-mediated autophagy	GO:0061684	0.0286163	1.54339	15	219	4	21017	ATG5,BAG3,LAMP2,CLU
GO:BP	segmentation	GO:0035282	0.0286655	1.54264	105	219	8	21017	BMI1,EP300,KAT2A,KDM6A,MAFB,NRP2,TP53,TAF10
GO:BP	protein deacylation	GO:0035601	0.029112	1.53593	51	219	6	21017	EP300,HDAC1,KAT2A,KAT2B,HDAC7,PRKAA2
GO:BP	response to gamma radiation	GO:0010332	0.029112	1.53593	51	219	6	21017	ATR,BCL2,CDKN1A,MDM2,SOD2,TP53
GO:BP	positive regulation of cytokine production	GO:0001819	0.0292334	1.53412	486	219	17	21017	ABCC8,ADRA2A,CD83,HSPB1,KAT2A,LACC1,PRKCQ,RIPK1,RIPK2,ABL1,ADCYAP1,CLU,DRD2,HGF,MAPKAPK2,RASGRP1,SORL1
GO:BP	metabolic process	GO:0008152	0.0293346	1.53262	14188	219	176	21017	ABCC8,ADRA2A,AGO4,AKT2,APOE,ASB2,ATF3,ATG3,ATG5,ATR,B3GNT5,BAG3,BAG4,BCL2,BDNF,BECN1,BMI1,BNIP3,BNIP3L,CASP2,CASP6,CD47,CD83,CDKN1A,CKS1B,CNN2,COX5B,CRIP1,CSK,CYP7B1,DAB2,DLG4,DNMT3A,DOT1L,DUSP7,EHMT2,EIF1,EP300,EPCAM,EPG5,FABP5,GRIA1,GRIN2B,GRM2,GRM3,GRN,GSN,HDAC1,HPRT1,HSPB1,IRAK2,JUN,KAT2A,KAT2B,KDM4D,KDM5C,KDM6A,KMT2C,LACC1,LAMP2,LGMN,LIG1,MAFB,MAFF,MAP3K1,MCM6,MDM2,MEF2C,MRE11,MSN,MYORG,NFE2…
GO:BP	regulation of neurogenesis	GO:0050767	0.0296844	1.52747	388	219	15	21017	ABCC8,BDNF,HDAC1,RELN,S100A10,SPP1,TP53,AMIGO1,DRD2,FGF2,HAP1,NKX6-2,PPP3CA,SORL1,TSPO
GO:BP	regulation of establishment of protein localization	GO:0070201	0.0303768	1.51746	539	219	18	21017	ABCC8,ADRA2A,AKT2,APOE,BAG3,BAG4,BNIP3L,CSK,EP300,MDM2,PRKACA,TRPM4,CNR1,DRD2,ITPR1,PPP3CA,PRKN,SORL1
GO:BP	lymphocyte differentiation	GO:0030098	0.0309445	1.50942	438	219	16	21017	ATG5,BCL2,BMI1,CD83,CD8A,EP300,KAT2A,MAFB,RELB,RHOA,RIPK2,TP53,TPD52,ABL1,CAMK4,RASGRP1
GO:BP	DNA integrity checkpoint signaling	GO:0031570	0.0312184	1.50559	139	219	9	21017	ATR,CASP2,CDKN1A,DOT1L,MDM2,MRE11,RAD9A,TP53,CCND1
GO:BP	response to ionizing radiation	GO:0010212	0.0312184	1.50559	139	219	9	21017	ATR,BCL2,CDKN1A,DNMT3A,KDM4D,MDM2,RAD9A,SOD2,TP53
GO:BP	angiogenesis	GO:0001525	0.0319153	1.496	541	219	18	21017	ABCC8,CD47,CLIC4,GRN,HSPB1,NFE2L2,NGFR,NRP2,PIK3CA,RHOA,TSPAN18,ABL1,CHRNA7,COL4A2,EGFL7,FGF2,HDAC7,MMP2
GO:BP	G1/S transition of mitotic cell cycle	GO:0000082	0.0320712	1.49389	214	219	11	21017	BCL2,CASP2,CDKN1A,MDM2,POLE,TP53,APC,CACNB4,CCND1,PPP3CA,TAF10
GO:BP	response to nicotine	GO:0035094	0.0326252	1.48645	52	219	6	21017	BCL2,GRM2,CHRNA7,CNR1,DRD2,MMP2
GO:BP	programmed necrotic cell death	GO:0097300	0.0326252	1.48645	52	219	6	21017	CASP6,RIPK1,TP53,MUTYH,PRKN,TSPO
GO:BP	excitatory postsynaptic potential	GO:0060079	0.03292	1.48254	107	219	8	21017	DLG4,GRIN2B,MEF2C,NLGN1,RELN,CHRNA7,DRD2,PPP3CA
GO:BP	receptor-mediated endocytosis	GO:0006898	0.0345885	1.46107	257	219	12	21017	APOE,DAB2,DLG4,GRIA1,IGF2R,RAC1,RALB,CLU,DRD2,NTF3,SORL1,TF
GO:BP	macromolecule metabolic process	GO:0043170	0.0347137	1.4595	12088	219	156	21017	ABCC8,ADRA2A,AGO4,AKT2,APOE,ASB2,ATF3,ATG3,ATG5,ATR,B3GNT5,BAG3,BAG4,BCL2,BDNF,BECN1,BMI1,BNIP3,BNIP3L,CASP2,CASP6,CD47,CD83,CDKN1A,CKS1B,CNN2,CRIP1,CSK,DAB2,DLG4,DNMT3A,DOT1L,DUSP7,EHMT2,EIF1,EP300,EPCAM,GRIA1,GRIN2B,GRM2,GRM3,GRN,GSN,HDAC1,HSPB1,IRAK2,JUN,KAT2A,KAT2B,KDM4D,KDM5C,KDM6A,KMT2C,LACC1,LAMP2,LGMN,LIG1,MAFB,MAFF,MAP3K1,MCM6,MDM2,MEF2C,MRE11,MSN,NFE2L2,NGFR,NQO1,NTHL1,OPTN,PAK1,PCNA,PE…
GO:BP	establishment of protein localization	GO:0045184	0.0363073	1.44001	1925	219	40	21017	ABCC8,ADRA2A,AKT2,APOE,ATG3,BAG3,BAG4,BECN1,BNIP3L,CDKN1A,CLSTN1,CSK,DAB2,DLG4,EP300,HSPB1,LAMP1,LAMP2,MDM2,NGFR,NLGN1,OPTN,PEX14,PRKACA,RAB6B,RAB7A,TP53,TRPM4,VPS4A,ADCYAP1,CLU,CNR1,DRD2,HAP1,ITPR1,PPP3CA,PRKN,RYR2,SORL1,TSPO
GO:BP	response to acid chemical	GO:0001101	0.0370396	1.43133	142	219	9	21017	DNMT3A,EP300,GRIA1,NQO1,PCNA,PIK3CA,SESN1,AMIGO1,MMP2
GO:BP	positive regulation of excitatory postsynaptic potential	GO:2000463	0.0375811	1.42503	32	219	5	21017	DLG4,GRIN2B,NLGN1,RELN,CHRNA7
GO:BP	peptidyl-serine modification	GO:0018209	0.0397563	1.40059	219	219	11	21017	ATR,BAG4,BCL2,BDNF,PAK1,PRKACA,RIPK1,RIPK2,HGF,MAPKAPK2,NTF3
GO:BP	cell-cell adhesion	GO:0098609	0.0398263	1.39983	948	219	25	21017	BCL2,BMI1,CD47,CD83,CLSTN1,CSK,DLG4,EPCAM,HSPB1,JAM2,MSN,NLGN1,PIK3CA,PRKCQ,RHOA,RIPK2,SOX9,ABL1,AMIGO1,CNTN1,ITGA7,NEGR1,PPP3CA,RASGRP1,TENM2
GO:BP	dendritic spine organization	GO:0097061	0.0404022	1.3936	80	219	7	21017	APOE,DLG4,GRIN2B,LGMN,NLGN1,RELN,CHRNA7
GO:BP	positive regulation of protein binding	GO:0032092	0.0406777	1.39064	54	219	6	21017	APOE,BDNF,RALB,RIPK2,ABL1,PRKN
GO:BP	leukocyte proliferation	GO:0070661	0.0407241	1.39015	351	219	14	21017	BCL2,BMI1,CDKN1A,CNN2,HPRT1,MEF2C,MSN,PRKCQ,RIPK2,TP53,ABL1,CLU,PPP3CA,RASGRP1
GO:BP	negative regulation of RNA metabolic process	GO:0051253	0.0407526	1.38985	1457	219	33	21017	ATF3,BAG4,BMI1,DAB2,DNMT3A,EHMT2,EP300,HDAC1,JUN,KAT2A,KAT2B,KDM5C,MAFB,MAFF,MDM2,MEF2C,PCNA,PEX14,RELB,SETDB1,SIN3A,SOX9,SUV39H1,SUV39H2,TET1,TP53,CCND1,HDAC7,MAPKAPK2,NKX6-2,NR4A2,PRKN,TENM2
GO:BP	immune response-activating cell surface receptor signaling pathway	GO:0002429	0.0419292	1.37748	306	219	13	21017	BCL2,CD47,CD8A,CSK,EP300,IRAK2,MEF2C,PAK1,PIK3CA,RIPK2,ABL1,CACNB4,NAGLU
GO:BP	mitotic G1/S transition checkpoint signaling	GO:0044819	0.0439182	1.35736	33	219	5	21017	CASP2,CDKN1A,MDM2,TP53,CCND1
GO:BP	response to amphetamine	GO:0001975	0.0439182	1.35736	33	219	5	21017	HPRT1,DBH,DRD2,NR4A2,PPP3CA
GO:BP	mitotic G1 DNA damage checkpoint signaling	GO:0031571	0.0439182	1.35736	33	219	5	21017	CASP2,CDKN1A,MDM2,TP53,CCND1
GO:BP	positive regulation of leukocyte activation	GO:0002696	0.0461515	1.33581	355	219	14	21017	BCL2,BMI1,CD47,CD83,CDKN1A,CSK,MEF2C,PIK3CA,PRKCQ,RHOA,RIPK2,ABL1,PPP3CA,RASGRP1
GO:BP	liver development	GO:0001889	0.0462181	1.33519	146	219	9	21017	IGF2R,PCNA,PIK3CA,SOD2,SOX9,CCND1,HGF,NAGLU,TAF10
GO:BP	cellular component assembly	GO:0022607	0.046543	1.33215	4644	219	75	21017	AGO4,APOE,ASB2,ATG3,ATG5,ATR,BAG3,BAG4,BCL2,BDNF,BECN1,CD47,CLSTN1,COA5,COTL1,DAB2,DLG4,EHMT2,EP300,GRIA1,GRIN2B,GSN,HPRT1,KAT2A,KAT2B,LAMP2,MAFB,MDM2,MEF2C,MSN,NLGN1,NPTX1,PAK1,PEX14,PIK3CA,PILRB,PRKACA,RAB7A,RAC1,RAD51C,RALB,RHOA,RIPK1,RIPK2,S100A10,SMC1A,SOD2,SOX9,STMN1,TARBP2,TP53,TRPM4,VPS4A,ABL1,ACTN1,AMIGO1,APC,ARHGEF10,CLU,CNTN1,CRTC2,DRD2,GABRG2,HAP1,HCN1,HDAC7,NEGR1,PRKAA2,PRKN,RYR1,SMN…
GO:BP	regulation of neurotransmitter secretion	GO:0046928	0.0475083	1.32323	82	219	7	21017	MEF2C,NLGN1,SYP,CACNB4,PNKD,PRKCG,PRKN
GO:BP	muscle cell apoptotic process	GO:0010657	0.0475083	1.32323	82	219	7	21017	ATG5,BAG3,BNIP3,NFE2L2,SOD2,TP53,APAF1
GO:BP	positive regulation of cytoskeleton organization	GO:0051495	0.0485536	1.31378	184	219	10	21017	BAG4,CD47,GSN,PAK1,RAC1,RHOA,S100A10,ABL1,ARHGEF10,NES
GO:BP	heart morphogenesis	GO:0003007	0.0486035	1.31333	266	219	12	21017	ASB2,KDM6A,MDM2,MEF2C,NRP2,SOX9,TP53,APC,NAGLU,RYR1,RYR2,TAZ
GO:BP	response to calcium ion	GO:0051592	0.048793	1.31164	147	219	9	21017	CLIC4,LGMN,MEF2C,NLGN1,SLC6A1,PPP3CA,PRKAA2,RYR1,RYR2
GO:CC	cell junction	GO:0030054	7.19033e-19	18.1433	2236	221	74	22115	ABCC8,ADRA2A,APOE,BDNF,BNIP3,CLIC4,CLSTN1,CNN2,CSK,DAB2,DLG4,EPCAM,FABP5,GRIA1,GRIA2,GRIN2B,GRM2,GRM3,GSN,HSPB1,IGF2R,JAM2,LAMP1,MEF2C,MSN,NGFR,NLGN1,NPTX1,NQO1,NRP2,PAK1,PIK3CA,PPFIA4,PRKACA,PRKAR2A,PRKAR2B,RAB6B,RAB7A,RAC1,RAD51C,RELB,RHOA,RPL28,SLC17A6,SLC6A1,SYP,ABL1,ACTN1,APC,CACNA1C,CACNB4,CALB2,CCND1,CHRNA7,CLU,CNR1,CNTN1,DBH,DRD2,FGF12,GABRG2,GABRR1,GAD1,HAP1,HCN1,ITPR1,NTF3,PNKD,PPP3CA,P…
GO:CC	somatodendritic compartment	GO:0036477	8.84384e-18	17.0534	852	221	45	22115	ADRA2A,APOE,BDNF,BECN1,BNIP3,DLG4,GRIA1,GRIA2,GRM2,GRM3,HDAC1,JAM2,NGFR,NLGN1,NQO1,PAK1,PRKACA,PRKAR2B,RAC1,RELN,RHOA,RPL28,SLC6A1,TRPM4,ABL1,ADCY9,ADCYAP1,AMIGO1,CACNA1C,CALB2,CLU,DRD2,EPHA6,GABRG2,HAP1,HCN1,NEGR1,NTF3,PPP3CA,PRKAA2,PRKCG,SLC12A5,SMN1,SORL1,TENM2
GO:CC	neuron projection	GO:0043005	3.00574e-17	16.522	1338	221	55	22115	ADRA2A,APOE,ATG5,BDNF,BECN1,BNIP3,CLSTN1,DLG4,GRIA1,GRIA2,GRIN2B,GRM2,GRM3,HSPB1,NGFR,NLGN1,NQO1,NRP2,PAK1,PRKACA,PRKAR2B,RAC1,RELN,RHOA,RPL28,SLC17A6,SLC6A1,STMN1,SYP,ABL1,ADCY9,ADCYAP1,AMIGO1,CACNA1C,CALB2,CHRNA7,CLU,CNR1,CNTN1,DRD2,EPHA6,GABRG2,GABRR1,GAD1,HAP1,HCN1,NEGR1,NTF3,PPP3CA,PRKAA2,PRKCG,PRKN,SLC12A5,SMN1,TENM2
GO:CC	synapse	GO:0045202	9.88228e-17	16.0051	1475	221	57	22115	ABCC8,ADRA2A,APOE,BDNF,BNIP3,CLSTN1,DLG4,FABP5,GRIA1,GRIA2,GRIN2B,GRM2,GRM3,LAMP1,MEF2C,NGFR,NLGN1,NPTX1,NQO1,NRP2,PPFIA4,PRKACA,PRKAR2B,RAB6B,RAB7A,RAC1,RELB,RHOA,RPL28,SLC17A6,SLC6A1,SYP,ABL1,ACTN1,CACNA1C,CACNB4,CALB2,CHRNA7,CLU,CNR1,CNTN1,DBH,DRD2,FGF12,GABRG2,GABRR1,GAD1,HAP1,HCN1,ITPR1,NTF3,PNKD,PPP3CA,PRKCG,PRKN,SLC12A5,TENM2
GO:CC	dendrite	GO:0030425	8.64034e-16	15.0635	627	221	37	22115	APOE,BDNF,BECN1,BNIP3,DLG4,GRIA1,GRIA2,GRM2,GRM3,NGFR,NLGN1,NQO1,PAK1,PRKACA,PRKAR2B,RAC1,RELN,RHOA,RPL28,ABL1,ADCY9,AMIGO1,CACNA1C,CALB2,CLU,DRD2,EPHA6,GABRG2,HAP1,HCN1,NEGR1,NTF3,PPP3CA,PRKAA2,PRKCG,SLC12A5,TENM2
GO:CC	dendritic tree	GO:0097447	9.59387e-16	15.018	629	221	37	22115	APOE,BDNF,BECN1,BNIP3,DLG4,GRIA1,GRIA2,GRM2,GRM3,NGFR,NLGN1,NQO1,PAK1,PRKACA,PRKAR2B,RAC1,RELN,RHOA,RPL28,ABL1,ADCY9,AMIGO1,CACNA1C,CALB2,CLU,DRD2,EPHA6,GABRG2,HAP1,HCN1,NEGR1,NTF3,PPP3CA,PRKAA2,PRKCG,SLC12A5,TENM2
GO:CC	plasma membrane bounded cell projection	GO:0120025	1.18539e-11	10.9261	2286	221	63	22115	ADRA2A,AKT2,APOE,ATG5,BDNF,BECN1,BNIP3,CLIC4,CLSTN1,DLG4,GRIA1,GRIA2,GRIN2B,GRM2,GRM3,GSN,HSPB1,MSN,NGFR,NLGN1,NQO1,NRP2,PAK1,PIK3CA,PRKACA,PRKAR2A,PRKAR2B,RAC1,RELN,RHOA,RPL28,SLC17A6,SLC6A1,STMN1,SYP,ABL1,ACTN1,ADCY9,ADCYAP1,AMIGO1,APC,CACNA1C,CALB2,CHRNA7,CLU,CNR1,CNTN1,DRD2,EPHA6,GABRG2,GABRR1,GAD1,HAP1,HCN1,NEGR1,NTF3,PPP3CA,PRKAA2,PRKCG,PRKN,SLC12A5,SMN1,TENM2
GO:CC	cell projection	GO:0042995	3.11315e-11	10.5068	2399	221	64	22115	ADRA2A,AKT2,APOE,ATG5,BDNF,BECN1,BNIP3,CLIC4,CLSTN1,DLG4,GRIA1,GRIA2,GRIN2B,GRM2,GRM3,GSN,HSPB1,MSN,NGFR,NLGN1,NQO1,NRP2,PAK1,PIK3CA,PRKACA,PRKAR2A,PRKAR2B,RAC1,RELN,RHOA,RPL28,SLC17A6,SLC6A1,SPP1,STMN1,SYP,ABL1,ACTN1,ADCY9,ADCYAP1,AMIGO1,APC,CACNA1C,CALB2,CHRNA7,CLU,CNR1,CNTN1,DRD2,EPHA6,GABRG2,GABRR1,GAD1,HAP1,HCN1,NEGR1,NTF3,PPP3CA,PRKAA2,PRKCG,PRKN,SLC12A5,SMN1,TENM2
GO:CC	postsynapse	GO:0098794	3.55053e-11	10.4497	652	221	32	22115	ADRA2A,BNIP3,CLSTN1,DLG4,FABP5,GRIA1,GRIA2,GRIN2B,GRM3,MEF2C,NGFR,NLGN1,NRP2,PRKACA,PRKAR2B,RAC1,RHOA,SLC6A1,ABL1,CACNA1C,CHRNA7,CNTN1,DRD2,GABRG2,GABRR1,HAP1,HCN1,ITPR1,PPP3CA,PRKCG,PRKN,TENM2
GO:CC	cytoplasm	GO:0005737	1.24151e-10	9.90605	12394	221	175	22115	ABCC8,ADRA2A,AGO4,AKT2,APOE,ASB2,ATG3,ATG5,ATR,B3GNT5,BAG3,BAG4,BCL2,BDNF,BECN1,BMI1,BNIP3,BNIP3L,CABLES1,CASP2,CASP6,CD47,CDKN1A,CLIC4,CLSTN1,CNN2,COA5,COTL1,COX5B,CRIP1,CSK,CYP7B1,DAB2,DLG4,DNMT3A,DOCK1,DOT1L,DUSP7,EIF1,EP300,EPG5,FABP5,GRIA1,GRIA2,GRIN2B,GRN,GSN,HDAC1,HPRT1,HSPB1,IGF2R,IRAK2,KAT2A,KAT2B,KDM5C,KMT2C,LACC1,LAMP1,LAMP2,LGMN,LIG1,MAFF,MAP3K1,MDM2,MEF2C,MRE11,MSN,MYORG,NCAPH,NFE2L2…
GO:CC	presynapse	GO:0098793	2.13281e-10	9.67105	568	221	29	22115	ABCC8,ADRA2A,BDNF,DLG4,GRIA1,GRM2,GRM3,LAMP1,NGFR,NLGN1,PPFIA4,RAB6B,RAB7A,SLC17A6,SLC6A1,SYP,CACNB4,CALB2,CNR1,CNTN1,DRD2,GABRR1,GAD1,HAP1,HCN1,NTF3,PNKD,PRKCG,PRKN
GO:CC	axon	GO:0030424	6.9408e-09	8.15859	655	221	29	22115	ADRA2A,ATG5,BDNF,DLG4,GRIA1,GRM2,GRM3,HSPB1,NGFR,NRP2,PAK1,SLC6A1,SYP,ABL1,ADCY9,AMIGO1,CALB2,CNR1,CNTN1,DRD2,GABRG2,GAD1,HAP1,HCN1,NTF3,PRKAA2,PRKCG,SMN1,TENM2
GO:CC	vesicle	GO:0031982	1.69062e-08	7.77195	4012	221	81	22115	ABCC8,AKT2,APOE,ATG5,BDNF,BECN1,CD47,CLIC4,CLSTN1,CNN2,COTL1,CSK,DAB2,DLG4,EPCAM,FABP5,GRIA1,GRIA2,GRIN2B,GRN,GSN,HPRT1,HSPB1,IGF2R,IRAK2,LAMP1,LAMP2,LGMN,MDM2,MSN,NGFR,NPTX1,OPTN,PCNA,PRDX1,PRKACA,PRKAR2A,PRKAR2B,PROS1,RAB6B,RAB7A,RAC1,RALB,RHOA,RIPK1,RIPK2,RPL28,S100A10,SLC17A6,SLC44A1,SOD2,SPP1,ST3GAL6,STMN1,SUV39H1,SYP,VPS4A,ACTN1,APAF1,ATP6V0E1,CAMK4,CLU,CNTN1,COL4A2,CRTC2,DBH,DRD2,GABRG2,GA…
GO:CC	synaptic membrane	GO:0097060	3.83772e-08	7.41593	400	221	22	22115	ADRA2A,CLSTN1,DLG4,GRIA1,GRIA2,GRIN2B,GRM2,GRM3,NLGN1,NRP2,SLC6A1,SYP,CACNA1C,CHRNA7,CNR1,CNTN1,DRD2,GABRG2,GABRR1,HCN1,PRKCG,TENM2
GO:CC	perinuclear region of cytoplasm	GO:0048471	1.12371e-07	6.94934	737	221	29	22115	BDNF,CDKN1A,CLIC4,DAB2,EPG5,IGF2R,LAMP1,LAMP2,LGMN,MSN,OPTN,PIK3CA,PRKACA,PRKAR2B,RAD51C,SPP1,SYP,TARBP2,TPD52,VPS4A,ABL1,APC,CLU,ITPR1,PRKCG,PRKN,PTPRR,TAF10,TF
GO:CC	glutamatergic synapse	GO:0098978	1.21271e-07	6.91624	425	221	22	22115	ADRA2A,APOE,CLSTN1,DLG4,GRIA1,GRM2,GRM3,NLGN1,NPTX1,NRP2,PPFIA4,PRKACA,PRKAR2B,RAC1,RHOA,ACTN1,CACNB4,CNR1,DRD2,GABRR1,HCN1,PPP3CA
GO:CC	postsynaptic membrane	GO:0045211	1.53287e-07	6.8145	278	221	18	22115	ADRA2A,CLSTN1,DLG4,GRIA1,GRIA2,GRIN2B,GRM3,NLGN1,NRP2,SLC6A1,CACNA1C,CHRNA7,CNTN1,DRD2,GABRG2,GABRR1,HCN1,TENM2
GO:CC	membrane-enclosed lumen	GO:0031974	2.27312e-07	6.64338	6663	221	110	22115	AKT2,APOE,ATF3,ATR,BAG3,BDNF,BECN1,BMI1,BNIP3,BNIP3L,CASP2,CASP6,CDKN1A,CKS1B,CLIC4,CNN2,COTL1,DAB2,DNMT3A,DOCK1,DOT1L,DUSP7,EHMT2,EP300,FABP5,GRN,GSN,HDAC1,IGF2R,JUN,KAT2A,KAT2B,KDM4D,KDM5C,KDM6A,KMT2C,LAMP2,LGMN,LIG1,MAFF,MCM6,MDM2,MEF2C,MRE11,NCAPH,NFE2L2,NGFR,NTHL1,OPTN,PAK1,PCNA,PEX14,POLE,PRKACA,PROS1,RAD50,RAD51B,RAD51C,RAD9A,RELB,RPA1,S100A10,SESN1,SETD1B,SETDB1,SIN3A,SLC44A1,SMC1A,SOD2,S…
GO:CC	intracellular organelle lumen	GO:0070013	2.27312e-07	6.64338	6663	221	110	22115	AKT2,APOE,ATF3,ATR,BAG3,BDNF,BECN1,BMI1,BNIP3,BNIP3L,CASP2,CASP6,CDKN1A,CKS1B,CLIC4,CNN2,COTL1,DAB2,DNMT3A,DOCK1,DOT1L,DUSP7,EHMT2,EP300,FABP5,GRN,GSN,HDAC1,IGF2R,JUN,KAT2A,KAT2B,KDM4D,KDM5C,KDM6A,KMT2C,LAMP2,LGMN,LIG1,MAFF,MCM6,MDM2,MEF2C,MRE11,NCAPH,NFE2L2,NGFR,NTHL1,OPTN,PAK1,PCNA,PEX14,POLE,PRKACA,PROS1,RAD50,RAD51B,RAD51C,RAD9A,RELB,RPA1,S100A10,SESN1,SETD1B,SETDB1,SIN3A,SLC44A1,SMC1A,SOD2,S…
GO:CC	organelle lumen	GO:0043233	2.27312e-07	6.64338	6663	221	110	22115	AKT2,APOE,ATF3,ATR,BAG3,BDNF,BECN1,BMI1,BNIP3,BNIP3L,CASP2,CASP6,CDKN1A,CKS1B,CLIC4,CNN2,COTL1,DAB2,DNMT3A,DOCK1,DOT1L,DUSP7,EHMT2,EP300,FABP5,GRN,GSN,HDAC1,IGF2R,JUN,KAT2A,KAT2B,KDM4D,KDM5C,KDM6A,KMT2C,LAMP2,LGMN,LIG1,MAFF,MCM6,MDM2,MEF2C,MRE11,NCAPH,NFE2L2,NGFR,NTHL1,OPTN,PAK1,PCNA,PEX14,POLE,PRKACA,PROS1,RAD50,RAD51B,RAD51C,RAD9A,RELB,RPA1,S100A10,SESN1,SETD1B,SETDB1,SIN3A,SLC44A1,SMC1A,SOD2,S…
GO:CC	nucleoplasm	GO:0005654	5.97761e-07	6.22347	4229	221	80	22115	AKT2,ATF3,ATR,BAG3,BECN1,BMI1,BNIP3,BNIP3L,CASP6,CDKN1A,CKS1B,DNMT3A,DOCK1,DOT1L,DUSP7,EHMT2,EP300,FABP5,HDAC1,JUN,KAT2A,KAT2B,KDM4D,KDM5C,KDM6A,KMT2C,LIG1,MAFF,MCM6,MDM2,MEF2C,MRE11,NCAPH,NFE2L2,NGFR,NTHL1,OPTN,PAK1,PCNA,POLE,PRKACA,RAD50,RAD51B,RAD51C,RAD9A,RELB,RPA1,SESN1,SETD1B,SETDB1,SIN3A,SLC44A1,SMC1A,SOX9,SUV39H1,SUV39H2,TARBP2,TP53,TRPM4,ABL1,AKT1S1,APC,CACNB4,CAMK4,CCND1,CRTC2,CXXC1,EPH…
GO:CC	dendritic spine	GO:0043197	7.5364e-07	6.12284	172	221	14	22115	DLG4,GRIA1,GRIA2,GRM3,NGFR,NLGN1,PRKACA,PRKAR2B,RAC1,RHOA,DRD2,HAP1,PPP3CA,TENM2
GO:CC	neuron spine	GO:0044309	1.01672e-06	5.9928	176	221	14	22115	DLG4,GRIA1,GRIA2,GRM3,NGFR,NLGN1,PRKACA,PRKAR2B,RAC1,RHOA,DRD2,HAP1,PPP3CA,TENM2
GO:CC	cytosol	GO:0005829	1.03139e-06	5.98658	5513	221	95	22115	AGO4,AKT2,ASB2,ATG3,ATG5,BAG3,BAG4,BCL2,BECN1,BMI1,CABLES1,CASP2,CASP6,CDKN1A,CLIC4,COTL1,CSK,DAB2,DLG4,DOCK1,DUSP7,EP300,FABP5,GSN,HDAC1,HPRT1,HSPB1,IRAK2,KAT2B,KDM5C,KMT2C,LAMP1,MAP3K1,MDM2,MEF2C,MRE11,MSN,NCAPH,NFE2L2,NGFR,NQO1,OPTN,PAK1,PEX14,PIK3CA,PPFIA4,PRDX1,PRKACA,PRKAR2A,PRKAR2B,PRKCQ,RAB6B,RAB7A,RAC1,RAD51C,RELB,RHOA,RIPK1,RIPK2,RPL28,SESN1,SLC44A1,SMC1A,STMN1,TARBP2,TP53,TRIM47,TRPM4,…
GO:CC	cytoplasmic vesicle	GO:0031410	1.95874e-06	5.70802	2523	221	56	22115	ABCC8,AKT2,APOE,ATG5,BDNF,BECN1,CD47,CLIC4,CLSTN1,CNN2,COTL1,DAB2,DLG4,FABP5,GRIA1,GRIA2,GRIN2B,GRN,GSN,IGF2R,IRAK2,LAMP1,LAMP2,LGMN,MDM2,NGFR,NPTX1,OPTN,PRDX1,PRKACA,PROS1,RAB6B,RAB7A,RAC1,RHOA,RIPK1,SLC17A6,SUV39H1,SYP,VPS4A,ACTN1,APAF1,ATP6V0E1,CLU,DBH,DRD2,GABRG2,GAD1,HAP1,HGF,ITPR1,NTF3,PLEKHO2,PRKN,SORL1,TF
GO:CC	intracellular vesicle	GO:0097708	2.13308e-06	5.67099	2529	221	56	22115	ABCC8,AKT2,APOE,ATG5,BDNF,BECN1,CD47,CLIC4,CLSTN1,CNN2,COTL1,DAB2,DLG4,FABP5,GRIA1,GRIA2,GRIN2B,GRN,GSN,IGF2R,IRAK2,LAMP1,LAMP2,LGMN,MDM2,NGFR,NPTX1,OPTN,PRDX1,PRKACA,PROS1,RAB6B,RAB7A,RAC1,RHOA,RIPK1,SLC17A6,SUV39H1,SYP,VPS4A,ACTN1,APAF1,ATP6V0E1,CLU,DBH,DRD2,GABRG2,GAD1,HAP1,HGF,ITPR1,NTF3,PLEKHO2,PRKN,SORL1,TF
GO:CC	bounding membrane of organelle	GO:0098588	9.85748e-06	5.00623	2217	221	50	22115	ABCC8,APOE,ATG5,B3GNT5,BCL2,BECN1,BNIP3,BNIP3L,CD47,CLSTN1,DAB2,DLG4,FABP5,GRIA1,GRIA2,GRN,IGF2R,IRAK2,LAMP1,LAMP2,MDM2,OPTN,PEX14,PROS1,RAB6B,RAB7A,RAC1,RHOA,RIPK1,SLC17A6,SLC44A1,ST3GAL6,SYP,TNFRSF1A,VPS4A,ATP6V0E1,CNR1,CPT1B,DBH,DRD2,GAD1,ITPR1,PRKN,RASGRP1,RYR1,RYR2,SORL1,TAZ,TF,TSPO
GO:CC	monoatomic ion channel complex	GO:0034702	1.05493e-05	4.97677	364	221	18	22115	ABCC8,CLIC4,DLG4,GRIA1,GRIA2,GRIN2B,PRKACA,SLC17A6,TRPM4,AMIGO1,CACNA1C,CACNB4,CHRNA7,GABRG2,GABRR1,HCN1,RYR1,RYR2
GO:CC	transporter complex	GO:1990351	1.33871e-05	4.87331	457	221	20	22115	ABCC8,CLIC4,DLG4,GRIA1,GRIA2,GRIN2B,PEX14,PRKACA,SLC17A6,TRPM4,AMIGO1,ATP6V0E1,CACNA1C,CACNB4,CHRNA7,GABRG2,GABRR1,HCN1,RYR1,RYR2
GO:CC	transmembrane transporter complex	GO:1902495	2.56046e-05	4.59168	430	221	19	22115	ABCC8,CLIC4,DLG4,GRIA1,GRIA2,GRIN2B,PRKACA,SLC17A6,TRPM4,AMIGO1,ATP6V0E1,CACNA1C,CACNB4,CHRNA7,GABRG2,GABRR1,HCN1,RYR1,RYR2
GO:CC	secretory vesicle	GO:0099503	3.7376e-05	4.42741	1073	221	31	22115	ABCC8,BDNF,CD47,CNN2,COTL1,DLG4,FABP5,GRIA1,GRN,GSN,IGF2R,LAMP1,LAMP2,PRKACA,PROS1,RAB7A,RAC1,RHOA,SLC17A6,SYP,ACTN1,APAF1,CLU,DBH,DRD2,HAP1,HGF,ITPR1,NTF3,PLEKHO2,TF
GO:CC	catalytic complex	GO:1902494	3.8414e-05	4.41551	1699	221	41	22115	AGO4,ASB2,ATG3,ATG5,BECN1,BMI1,CASP2,CDKN1A,CKS1B,DNMT3A,EP300,HDAC1,HSPB1,KAT2A,KAT2B,KDM6A,KMT2C,PCNA,PIK3CA,POLE,PRKACA,PRKAR2A,PRKAR2B,RAC1,RAD51C,RIPK1,SETD1B,SIN3A,TARBP2,VPS4A,APC,ATP6V0E1,CCND1,CXXC1,HDAC7,ITPR1,POLR2J,PPP3CA,PRKAA2,PRKN,TAF10
GO:CC	extracellular exosome	GO:0070062	4.15419e-05	4.38151	2110	221	47	22115	APOE,CD47,CLIC4,COTL1,CSK,EPCAM,FABP5,GRN,GSN,HPRT1,HSPB1,IGF2R,LAMP1,LAMP2,LGMN,MSN,PCNA,PRDX1,PRKACA,PRKAR2A,PRKAR2B,PROS1,RAB7A,RAC1,RALB,RHOA,RPL28,S100A10,SLC44A1,SOD2,SPP1,ST3GAL6,STMN1,VPS4A,ACTN1,APAF1,CAMK4,CLU,CNTN1,COL4A2,CRTC2,MAPKAPK2,NAGLU,RYR1,SORL1,TF,TSPO
GO:CC	plasma membrane region	GO:0098590	5.26239e-05	4.27882	1271	221	34	22115	ADRA2A,AKT2,CD8A,CLSTN1,DLG4,EPCAM,GRIA1,GRIA2,GRIN2B,GRM2,GRM3,MSN,NLGN1,NRP2,PAK1,PRKACA,PRKAR2A,RAC1,RHOA,SLC6A1,SYP,APC,CACNA1C,CHRNA7,CNR1,CNTN1,DRD2,GABRG2,GABRR1,HCN1,PRKCG,SLC12A5,TENM2,TF
GO:CC	neuronal cell body	GO:0043025	5.75195e-05	4.24018	500	221	20	22115	ADRA2A,APOE,GRIA1,GRIA2,HDAC1,NGFR,NQO1,PRKAR2B,SLC6A1,TRPM4,ABL1,ADCYAP1,AMIGO1,CACNA1C,DRD2,NEGR1,PRKAA2,SLC12A5,SMN1,SORL1
GO:CC	extracellular vesicle	GO:1903561	5.80788e-05	4.23598	2134	221	47	22115	APOE,CD47,CLIC4,COTL1,CSK,EPCAM,FABP5,GRN,GSN,HPRT1,HSPB1,IGF2R,LAMP1,LAMP2,LGMN,MSN,PCNA,PRDX1,PRKACA,PRKAR2A,PRKAR2B,PROS1,RAB7A,RAC1,RALB,RHOA,RPL28,S100A10,SLC44A1,SOD2,SPP1,ST3GAL6,STMN1,VPS4A,ACTN1,APAF1,CAMK4,CLU,CNTN1,COL4A2,CRTC2,MAPKAPK2,NAGLU,RYR1,SORL1,TF,TSPO
GO:CC	extracellular organelle	GO:0043230	5.88873e-05	4.22998	2135	221	47	22115	APOE,CD47,CLIC4,COTL1,CSK,EPCAM,FABP5,GRN,GSN,HPRT1,HSPB1,IGF2R,LAMP1,LAMP2,LGMN,MSN,PCNA,PRDX1,PRKACA,PRKAR2A,PRKAR2B,PROS1,RAB7A,RAC1,RALB,RHOA,RPL28,S100A10,SLC44A1,SOD2,SPP1,ST3GAL6,STMN1,VPS4A,ACTN1,APAF1,CAMK4,CLU,CNTN1,COL4A2,CRTC2,MAPKAPK2,NAGLU,RYR1,SORL1,TF,TSPO
GO:CC	extracellular membrane-bounded organelle	GO:0065010	5.88873e-05	4.22998	2135	221	47	22115	APOE,CD47,CLIC4,COTL1,CSK,EPCAM,FABP5,GRN,GSN,HPRT1,HSPB1,IGF2R,LAMP1,LAMP2,LGMN,MSN,PCNA,PRDX1,PRKACA,PRKAR2A,PRKAR2B,PROS1,RAB7A,RAC1,RALB,RHOA,RPL28,S100A10,SLC44A1,SOD2,SPP1,ST3GAL6,STMN1,VPS4A,ACTN1,APAF1,CAMK4,CLU,CNTN1,COL4A2,CRTC2,MAPKAPK2,NAGLU,RYR1,SORL1,TF,TSPO
GO:CC	plasma membrane	GO:0005886	6.11342e-05	4.21372	5783	221	93	22115	ABCC8,ADRA2A,AKT2,APOE,BAG4,CD47,CD83,CD8A,CLIC4,CLSTN1,CSK,DAB2,DLG4,DOCK1,EPCAM,FABP5,GRIA1,GRIA2,GRIN2B,GRM2,GRM3,GRN,GSN,HSPB1,IFNAR2,IGF2R,IRAK2,JAM2,LAMP1,LAMP2,MDM2,MSN,NFE2L2,NGFR,NLGN1,NRP2,PAK1,PIK3CA,PILRB,POLE,PRKACA,PRKAR2A,PRKAR2B,PRKCQ,PROS1,RAB7A,RAC1,RALB,RELN,RHOA,RIPK1,RIPK2,S100A10,SLC17A6,SLC44A1,SLC6A1,SUV39H1,SYP,TNFRSF10B,TNFRSF1A,TRPM4,VPS4A,ACTN1,ADCY9,AMIGO1,APC,BCHE,CA…
GO:CC	cell body	GO:0044297	9.9811e-05	4.00082	567	221	21	22115	ADRA2A,APOE,GRIA1,GRIA2,HDAC1,NGFR,NQO1,PRKAR2B,RPL28,SLC6A1,TRPM4,ABL1,ADCYAP1,AMIGO1,CACNA1C,DRD2,NEGR1,PRKAA2,SLC12A5,SMN1,SORL1
GO:CC	I band	GO:0031674	0.00011167	3.95206	149	221	11	22115	ASB2,BAG3,HSPB1,KAT2B,PAK1,ACTN1,CACNA1C,PPP3CA,RYR1,RYR2,SMN1
GO:CC	excitatory synapse	GO:0060076	0.000120402	3.91937	67	221	8	22115	DLG4,GRIA1,GRIA2,NLGN1,PPFIA4,SLC17A6,SYP,CALB2
GO:CC	cell periphery	GO:0071944	0.000183844	3.73555	6269	221	97	22115	ABCC8,ADRA2A,AKT2,APOE,BAG4,CD47,CD83,CD8A,CLIC4,CLSTN1,COTL1,CSK,DAB2,DLG4,DOCK1,EPCAM,FABP5,GRIA1,GRIA2,GRIN2B,GRM2,GRM3,GRN,GSN,HSPB1,IFNAR2,IGF2R,IRAK2,JAM2,LAMP1,LAMP2,MDM2,MSN,NFE2L2,NGFR,NLGN1,NRP2,PAK1,PIK3CA,PILRB,POLE,PRKACA,PRKAR2A,PRKAR2B,PRKCQ,PROS1,RAB7A,RAC1,RALB,RELN,RHOA,RIPK1,RIPK2,S100A10,SLC17A6,SLC44A1,SLC6A1,SUV39H1,SYP,TNFRSF10B,TNFRSF1A,TRPM4,VPS4A,ACTN1,ADCY9,AMIGO1,APC,B…
GO:CC	endomembrane system	GO:0012505	0.000193034	3.71437	4803	221	80	22115	ABCC8,AKT2,APOE,ATR,B3GNT5,BCL2,BDNF,BECN1,BNIP3,BNIP3L,CD47,CLSTN1,CNN2,COTL1,CYP7B1,DAB2,DLG4,FABP5,GRIA1,GRIA2,GRIN2B,GRN,GSN,IGF2R,IRAK2,LACC1,LAMP1,LAMP2,LGMN,MYORG,NFE2L2,NGFR,NLGN1,NPTX1,OPTN,PAK1,PRKACA,PROS1,RAB6B,RAB7A,RAC1,RHOA,RIPK1,RIPK2,SLC17A6,SPP1,ST3GAL6,SYP,TMCC3,TMEM64,TNFRSF1A,TP53,TPD52,TRPM4,VPS4A,ABL1,ACTN1,APAF1,APC,ATP6V0E1,BCHE,CCND1,CLU,COL4A2,DBH,DRD2,HAP1,HGF,ITPR1,NT…
GO:CC	extracellular region	GO:0005576	0.000210573	3.6766	4232	221	73	22115	APOE,BDNF,CD47,CD8A,CLIC4,CLSTN1,CNN2,COTL1,CSK,EPCAM,FABP5,GRIA1,GRN,GSN,HPRT1,HSPB1,IFNAR2,IGF2R,KAT2A,KDM4D,LAMP1,LAMP2,LGMN,MSN,NGFR,NLGN1,NPTX1,NRP2,PCNA,PRDX1,PRKACA,PRKAR2A,PRKAR2B,PROS1,RAB7A,RAC1,RALB,RELN,RHOA,RPL28,S100A10,SLC44A1,SOD2,SPP1,ST3GAL6,STMN1,TNFRSF1A,VPS4A,ACTN1,ADCYAP1,APAF1,BCHE,CAMK4,CLU,CNTN1,COL4A2,CRTC2,DBH,EGFL7,FGF12,FGF2,HGF,MAPKAPK2,MMP2,NAGLU,NEGR1,NTF3,PLEKHO2,…
GO:CC	cytoplasmic vesicle membrane	GO:0030659	0.00025298	3.59691	1234	221	32	22115	ABCC8,APOE,ATG5,BECN1,CD47,CLIC4,DAB2,DLG4,FABP5,GRIA1,GRIA2,IGF2R,IRAK2,LAMP1,LAMP2,MDM2,OPTN,RAB7A,RAC1,RHOA,RIPK1,SLC17A6,SYP,VPS4A,ATP6V0E1,DBH,DRD2,GABRG2,GAD1,ITPR1,SORL1,TF
GO:CC	nuclear lumen	GO:0031981	0.000266687	3.574	5524	221	88	22115	AKT2,ATF3,ATR,BAG3,BECN1,BMI1,BNIP3,BNIP3L,CASP2,CASP6,CDKN1A,CKS1B,CLIC4,DAB2,DNMT3A,DOCK1,DOT1L,DUSP7,EHMT2,EP300,FABP5,HDAC1,JUN,KAT2A,KAT2B,KDM4D,KDM5C,KDM6A,KMT2C,LIG1,MAFF,MCM6,MDM2,MEF2C,MRE11,NCAPH,NFE2L2,NGFR,NTHL1,OPTN,PAK1,PCNA,PEX14,POLE,PRKACA,RAD50,RAD51B,RAD51C,RAD9A,RELB,RPA1,S100A10,SESN1,SETD1B,SETDB1,SIN3A,SLC44A1,SMC1A,SOX9,SUV39H1,SUV39H2,TARBP2,TP53,TRPM4,ABL1,AKT1S1,APC,CAC…
GO:CC	extracellular space	GO:0005615	0.000281797	3.55006	3303	221	61	22115	APOE,BDNF,CD47,CLIC4,COTL1,CSK,EPCAM,FABP5,GRN,GSN,HPRT1,HSPB1,IFNAR2,IGF2R,KAT2A,KDM4D,LAMP1,LAMP2,LGMN,MSN,PCNA,PRDX1,PRKACA,PRKAR2A,PRKAR2B,PROS1,RAB7A,RAC1,RALB,RELN,RHOA,RPL28,S100A10,SLC44A1,SOD2,SPP1,ST3GAL6,STMN1,TNFRSF1A,VPS4A,ACTN1,APAF1,BCHE,CAMK4,CLU,CNTN1,COL4A2,CRTC2,DBH,FGF12,FGF2,HGF,MAPKAPK2,MMP2,NAGLU,NTF3,PTPRR,RYR1,SORL1,TF,TSPO
GO:CC	endocytic vesicle membrane	GO:0030666	0.000302329	3.51952	200	221	12	22115	APOE,ATG5,DLG4,GRIA1,GRIA2,IGF2R,LAMP1,LAMP2,MDM2,RAB7A,ATP6V0E1,TF
GO:CC	postsynaptic density	GO:0014069	0.0003041	3.51698	320	221	15	22115	ADRA2A,BNIP3,CLSTN1,DLG4,FABP5,GRIA1,GRIA2,GRIN2B,GRM3,NGFR,NLGN1,CACNA1C,ITPR1,PRKCG,PRKN
GO:CC	vesicle membrane	GO:0012506	0.000322932	3.49089	1248	221	32	22115	ABCC8,APOE,ATG5,BECN1,CD47,CLIC4,DAB2,DLG4,FABP5,GRIA1,GRIA2,IGF2R,IRAK2,LAMP1,LAMP2,MDM2,OPTN,RAB7A,RAC1,RHOA,RIPK1,SLC17A6,SYP,VPS4A,ATP6V0E1,DBH,DRD2,GABRG2,GAD1,ITPR1,SORL1,TF
GO:CC	presynaptic membrane	GO:0042734	0.000348933	3.45726	167	221	11	22115	ADRA2A,GRIA1,GRM2,GRM3,SLC6A1,SYP,CNR1,CNTN1,DRD2,GABRR1,HCN1
GO:CC	Z disc	GO:0030018	0.000351076	3.4546	134	221	10	22115	ASB2,BAG3,HSPB1,PAK1,ACTN1,CACNA1C,PPP3CA,RYR1,RYR2,SMN1
GO:CC	membrane protein complex	GO:0098796	0.000405978	3.3915	1325	221	33	22115	ABCC8,BCL2,BECN1,CD8A,CLIC4,DLG4,GRIA1,GRIA2,GRIN2B,IGF2R,LAMP2,PIK3CA,PRKACA,RAB7A,RAC1,RIPK1,S100A10,SLC17A6,TRPM4,AMIGO1,APC,ATP6V0E1,CACNA1C,CACNB4,CHRNA7,DRD2,GABRG2,GABRR1,HCN1,ITGA7,RYR1,RYR2,TF
GO:CC	asymmetric synapse	GO:0032279	0.000558255	3.25317	336	221	15	22115	ADRA2A,BNIP3,CLSTN1,DLG4,FABP5,GRIA1,GRIA2,GRIN2B,GRM3,NGFR,NLGN1,CACNA1C,ITPR1,PRKCG,PRKN
GO:CC	GABA-ergic synapse	GO:0098982	0.000695786	3.15752	84	221	8	22115	ADRA2A,NLGN1,SLC6A1,CNR1,DRD2,GABRG2,GABRR1,GAD1
GO:CC	endocytic vesicle	GO:0030139	0.000801293	3.09621	346	221	15	22115	APOE,ATG5,BECN1,DLG4,GRIA1,GRIA2,GSN,IGF2R,LAMP1,LAMP2,MDM2,RAB7A,ATP6V0E1,DRD2,TF
GO:CC	sarcomere	GO:0030017	0.000821935	3.08516	220	221	12	22115	ASB2,BAG3,HSPB1,KAT2B,PAK1,ACTN1,CACNA1C,MMP2,PPP3CA,RYR1,RYR2,SMN1
GO:CC	postsynaptic specialization	GO:0099572	0.000859987	3.06551	348	221	15	22115	ADRA2A,BNIP3,CLSTN1,DLG4,FABP5,GRIA1,GRIA2,GRIN2B,GRM3,NGFR,NLGN1,CACNA1C,ITPR1,PRKCG,PRKN
GO:CC	nuclear chromosome	GO:0000228	0.00113681	2.94431	227	221	12	22115	HDAC1,JUN,MCM6,NCAPH,PCNA,POLE,RAD50,RAD9A,RPA1,SIN3A,SMC1A,SUV39H1
GO:CC	chromosome	GO:0005694	0.00146447	2.83432	1956	221	41	22115	ATF3,ATR,BMI1,DNMT3A,EHMT2,EP300,HDAC1,JUN,KAT2A,KAT2B,KDM4D,KDM5C,MAFB,MAFF,MCM6,MEF2C,MRE11,NCAPH,NFE2L2,PAK1,PCNA,POLE,RAD50,RAD51B,RAD51C,RAD9A,RELB,RPA1,SETD1B,SETDB1,SIN3A,SMC1A,SOX9,SUV39H1,SUV39H2,TET1,TP53,APC,NKX6-2,NR4A2,TAF10
GO:CC	cell surface	GO:0009986	0.0015363	2.81353	904	221	25	22115	CD47,CD83,CD8A,CLIC4,CLSTN1,EPCAM,GRIA1,GRIA2,GRIN2B,IGF2R,JAM2,LAMP1,MSN,NGFR,NLGN1,PPFIA4,S100A10,SLC6A1,TNFRSF10B,TNFRSF1A,CLU,EGFL7,ITGA7,SORL1,TF
GO:CC	transferase complex	GO:1990234	0.00159654	2.79682	906	221	25	22115	ASB2,ATG3,ATG5,BECN1,BMI1,CDKN1A,CKS1B,EP300,KAT2A,KAT2B,KDM6A,KMT2C,PCNA,PIK3CA,POLE,PRKACA,PRKAR2A,PRKAR2B,SETD1B,CCND1,CXXC1,POLR2J,PRKAA2,PRKN,TAF10
GO:CC	neuron to neuron synapse	GO:0098984	0.00169663	2.77041	368	221	15	22115	ADRA2A,BNIP3,CLSTN1,DLG4,FABP5,GRIA1,GRIA2,GRIN2B,GRM3,NGFR,NLGN1,CACNA1C,ITPR1,PRKCG,PRKN
GO:CC	cell-cell junction	GO:0005911	0.00182312	2.73919	519	221	18	22115	CLIC4,CNN2,CSK,DLG4,EPCAM,GRIA1,JAM2,MSN,NGFR,PAK1,PIK3CA,RHOA,ACTN1,APC,CALB2,CCND1,PPP3CA,PRKCG
GO:CC	intracellular membrane-bounded organelle	GO:0043231	0.00202398	2.69379	14608	221	176	22115	ABCC8,AGO4,AKT2,APOE,ATF3,ATG5,ATR,B3GNT5,BAG3,BAG4,BCL2,BDNF,BECN1,BMI1,BNIP3,BNIP3L,CABLES1,CASP2,CASP6,CD47,CDKN1A,CKS1B,CLIC4,CLSTN1,CNN2,COA5,COTL1,COX5B,CYP7B1,DAB2,DLG4,DNMT3A,DOCK1,DOT1L,DUSP7,EHMT2,EIF1,EP300,EPG5,FABP5,GRIA1,GRIA2,GRIN2B,GRN,GSN,HDAC1,HSPB1,IGF2R,IRAK2,JUN,KAT2A,KAT2B,KDM4D,KDM5C,KDM6A,KMT2C,LACC1,LAMP1,LAMP2,LGMN,LIG1,MAFB,MAFF,MCM6,MDM2,MEF2C,MRE11,MSN,MYORG,NCAPH,NFE…
GO:CC	transferase complex, transferring phosphorus-containing groups	GO:0061695	0.00217023	2.66349	329	221	14	22115	BECN1,CDKN1A,CKS1B,KAT2A,PCNA,PIK3CA,POLE,PRKACA,PRKAR2A,PRKAR2B,CCND1,POLR2J,PRKAA2,TAF10
GO:CC	membrane-bounded organelle	GO:0043227	0.00217413	2.66272	15672	221	185	22115	ABCC8,AGO4,AKT2,APOE,ATF3,ATG5,ATR,B3GNT5,BAG3,BAG4,BCL2,BDNF,BECN1,BMI1,BNIP3,BNIP3L,CABLES1,CASP2,CASP6,CD47,CDKN1A,CKS1B,CLIC4,CLSTN1,CNN2,COA5,COTL1,COX5B,CSK,CYP7B1,DAB2,DLG4,DNMT3A,DOCK1,DOT1L,DUSP7,EHMT2,EIF1,EP300,EPCAM,EPG5,FABP5,GRIA1,GRIA2,GRIN2B,GRN,GSN,HDAC1,HPRT1,HSPB1,IGF2R,IRAK2,JUN,KAT2A,KAT2B,KDM4D,KDM5C,KDM6A,KMT2C,LACC1,LAMP1,LAMP2,LGMN,LIG1,MAFB,MAFF,MCM6,MDM2,MEF2C,MRE11,MSN…
GO:CC	myofibril	GO:0030016	0.00228341	2.64142	243	221	12	22115	ASB2,BAG3,HSPB1,KAT2B,PAK1,ACTN1,CACNA1C,MMP2,PPP3CA,RYR1,RYR2,SMN1
GO:CC	transport vesicle	GO:0030133	0.00290486	2.53687	434	221	16	22115	ABCC8,BDNF,DLG4,GRIA1,IGF2R,LAMP1,NPTX1,RAB7A,SLC17A6,SYP,DBH,DRD2,HAP1,ITPR1,NTF3,SORL1
GO:CC	protein-containing complex	GO:0032991	0.00321803	2.49241	7861	221	110	22115	ABCC8,ADRA2A,AGO4,APOE,ASB2,ATF3,ATG3,ATG5,ATR,BAG3,BCL2,BECN1,BMI1,CASP2,CD8A,CDKN1A,CKS1B,CLIC4,DLG4,DNMT3A,DOCK1,DOT1L,EIF1,EP300,GRIA1,GRIA2,GRIN2B,HDAC1,HSPB1,IGF2R,JAM2,JUN,KAT2A,KAT2B,KDM6A,KMT2C,LAMP2,MAFB,MAFF,MCM6,MDM2,MEF2C,MRE11,NCAPH,NFE2L2,NLGN1,NRP2,PAK1,PCNA,PEX14,PIK3CA,POLE,PRKACA,PRKAR2A,PRKAR2B,RAB7A,RAC1,RAD50,RAD51B,RAD51C,RAD9A,RELB,RELN,RIPK1,RIPK2,RPA1,RPL28,S100A10,SESN1…
GO:CC	contractile muscle fiber	GO:0043292	0.00343294	2.46433	253	221	12	22115	ASB2,BAG3,HSPB1,KAT2B,PAK1,ACTN1,CACNA1C,MMP2,PPP3CA,RYR1,RYR2,SMN1
GO:CC	nuclear body	GO:0016604	0.0039579	2.40254	894	221	24	22115	ATR,BECN1,BMI1,BNIP3L,CDKN1A,DOCK1,EHMT2,MDM2,MEF2C,MRE11,PCNA,PRKACA,RPA1,SETD1B,TARBP2,TP53,ABL1,CACNB4,CXXC1,NR4A2,PRKAA2,PRKN,SMN1,TENM2
GO:CC	synaptic vesicle	GO:0008021	0.00417208	2.37965	216	221	11	22115	ABCC8,BDNF,DLG4,GRIA1,LAMP1,RAB7A,SLC17A6,SYP,DRD2,HAP1,NTF3
GO:CC	anchoring junction	GO:0070161	0.00483777	2.31535	905	221	24	22115	CLIC4,CNN2,CSK,DAB2,DLG4,EPCAM,GRIA1,GSN,HSPB1,IGF2R,JAM2,MSN,NGFR,PAK1,PIK3CA,PRKAR2A,RAC1,RHOA,ACTN1,APC,CALB2,CCND1,PPP3CA,PRKCG
GO:CC	membrane	GO:0016020	0.0064319	2.19166	9912	221	130	22115	ABCC8,ADRA2A,AGO4,AKT2,APOE,ATG5,B3GNT5,BAG3,BAG4,BCL2,BECN1,BNIP3,BNIP3L,CD47,CD83,CD8A,CLIC4,CLSTN1,CNN2,COX5B,CSK,CYP7B1,DAB2,DLG4,DOCK1,EPCAM,FABP5,GRIA1,GRIA2,GRIN2B,GRM2,GRM3,GRN,GSN,HSPB1,IFNAR2,IGF2R,IRAK2,JAM2,LAMP1,LAMP2,MDM2,MSN,MYORG,NCAPH,NFE2L2,NGFR,NLGN1,NRP2,OPTN,PAK1,PEX14,PIK3CA,PILRB,PLXDC2,POLE,PRKACA,PRKAR2A,PRKAR2B,PRKCQ,PROS1,RAB6B,RAB7A,RAC1,RAD50,RALB,RELN,RHOA,RIPK1,RIPK…
GO:CC	transcription regulator complex	GO:0005667	0.00699332	2.15532	519	221	17	22115	ATF3,EP300,HDAC1,JUN,KAT2A,MAFB,MAFF,MDM2,NFE2L2,RELB,S100A10,SIN3A,SOX9,TP53,CCND1,NR4A2,TAF10
GO:CC	exocytic vesicle	GO:0070382	0.0094967	2.02243	236	221	11	22115	ABCC8,BDNF,DLG4,GRIA1,LAMP1,RAB7A,SLC17A6,SYP,DRD2,HAP1,NTF3
GO:CC	intracellular protein-containing complex	GO:0140535	0.0102463	1.98943	948	221	24	22115	AGO4,ASB2,BAG3,BMI1,CKS1B,DOCK1,EP300,HSPB1,KAT2A,KAT2B,POLE,PRKACA,PRKAR2A,PRKAR2B,RAD51C,TARBP2,AKT1S1,APC,ITPR1,POLR2J,PPP3CA,PRKAA2,PRKN,TAF10
GO:CC	endoplasmic reticulum	GO:0005783	0.012436	1.90532	2066	221	40	22115	APOE,BCL2,BDNF,BECN1,BNIP3,BNIP3L,CLSTN1,CYP7B1,DLG4,GRIA1,GRIA2,GRIN2B,GRN,LACC1,MYORG,NPTX1,PROS1,RAC1,RHOA,RIPK2,SPP1,TMCC3,TMEM64,TP53,TPD52,TRPM4,BCHE,CLU,COL4A2,DBH,HAP1,ITPR1,PRKN,RASGRP1,RYR1,RYR2,SORL1,TENM2,TF,TSPO
GO:CC	secretory granule	GO:0030141	0.0124638	1.90435	897	221	23	22115	CD47,CNN2,COTL1,FABP5,GRN,GSN,IGF2R,LAMP1,LAMP2,PRKACA,PROS1,RAB7A,RAC1,RHOA,ACTN1,APAF1,CLU,DBH,DRD2,HGF,ITPR1,PLEKHO2,TF
GO:CC	organelle	GO:0043226	0.0137423	1.86194	16811	221	192	22115	ABCC8,ADRA2A,AGO4,AKT2,APOE,ASB2,ATF3,ATG5,ATR,B3GNT5,BAG3,BAG4,BCL2,BDNF,BECN1,BMI1,BNIP3,BNIP3L,CABLES1,CASP2,CASP6,CD47,CDKN1A,CKS1B,CLIC4,CLSTN1,CNN2,COA5,COTL1,COX5B,CSK,CYP7B1,DAB2,DLG4,DNMT3A,DOCK1,DOT1L,DUSP7,EHMT2,EIF1,EP300,EPCAM,EPG5,FABP5,GRIA1,GRIA2,GRIN2B,GRM3,GRN,GSN,HDAC1,HPRT1,HSPB1,IGF2R,IRAK2,JUN,KAT2A,KAT2B,KDM4D,KDM5C,KDM6A,KMT2C,LACC1,LAMP1,LAMP2,LGMN,LIG1,MAFB,MAFF,MCM6,MDM…
GO:CC	intracellular organelle	GO:0043229	0.0188658	1.72432	16022	221	185	22115	ABCC8,AGO4,AKT2,APOE,ASB2,ATF3,ATG5,ATR,B3GNT5,BAG3,BAG4,BCL2,BDNF,BECN1,BMI1,BNIP3,BNIP3L,CABLES1,CASP2,CASP6,CD47,CDKN1A,CKS1B,CLIC4,CLSTN1,CNN2,COA5,COTL1,COX5B,CYP7B1,DAB2,DLG4,DNMT3A,DOCK1,DOT1L,DUSP7,EHMT2,EIF1,EP300,EPG5,FABP5,GRIA1,GRIA2,GRIN2B,GRN,GSN,HDAC1,HSPB1,IGF2R,IRAK2,JUN,KAT2A,KAT2B,KDM4D,KDM5C,KDM6A,KMT2C,LACC1,LAMP1,LAMP2,LGMN,LIG1,MAFB,MAFF,MCM6,MDM2,MEF2C,MRE11,MSN,MYORG,NCAP…
GO:CC	chromosomal region	GO:0098687	0.0204694	1.6889	403	221	14	22115	ATR,DNMT3A,KAT2B,KDM4D,MCM6,MRE11,PCNA,RAD50,RPA1,SIN3A,SMC1A,SUV39H1,SUV39H2,APC
GO:CC	organelle membrane	GO:0031090	0.0223098	1.6515	3787	221	61	22115	ABCC8,APOE,ATG5,B3GNT5,BCL2,BECN1,BNIP3,BNIP3L,CD47,CLIC4,CLSTN1,COX5B,CYP7B1,DAB2,DLG4,FABP5,GRIA1,GRIA2,GRIN2B,GRN,IGF2R,IRAK2,LAMP1,LAMP2,MDM2,MYORG,OPTN,PAK1,PEX14,PROS1,RAB6B,RAB7A,RAC1,RHOA,RIPK1,SLC17A6,SLC44A1,ST3GAL6,SYP,TMCC3,TNFRSF1A,VPS4A,ABL1,ATP6V0E1,CCND1,CLU,CNR1,CPT1B,DBH,DRD2,GABRG2,GAD1,ITPR1,PRKN,RASGRP1,RYR1,RYR2,SORL1,TAZ,TF,TSPO
GO:CC	blood microparticle	GO:0072562	0.0253763	1.59557	137	221	8	22115	APOE,GSN,KDM4D,MSN,PROS1,BCHE,CLU,TF
GO:CC	cAMP-dependent protein kinase complex	GO:0005952	0.0276601	1.55815	9	221	3	22115	PRKACA,PRKAR2A,PRKAR2B
GO:CC	receptor complex	GO:0043235	0.0301454	1.52078	527	221	16	22115	ADRA2A,CD8A,DLG4,GRIA1,GRIA2,GRIN2B,NLGN1,NRP2,RIPK1,TNFRSF1A,CHRNA7,DRD2,GABRG2,GABRR1,ITGA7,TF
GO:CC	cation channel complex	GO:0034703	0.0327684	1.48454	225	221	10	22115	ABCC8,DLG4,PRKACA,TRPM4,AMIGO1,CACNA1C,CACNB4,HCN1,RYR1,RYR2
GO:CC	mitochondrial outer membrane	GO:0005741	0.0339907	1.46864	226	221	10	22115	BCL2,BECN1,BNIP3,BNIP3L,SLC44A1,CNR1,CPT1B,PRKN,TAZ,TSPO
GO:CC	replication fork	GO:0005657	0.0342129	1.46581	74	221	6	22115	MRE11,PCNA,RAD51B,RAD51C,RPA1,TP53
GO:CC	PCNA-p21 complex	GO:0070557	0.0347612	1.45891	2	221	2	22115	CDKN1A,PCNA
GO:CC	secretory granule lumen	GO:0034774	0.0349576	1.45646	321	221	12	22115	CNN2,COTL1,FABP5,GRN,GSN,PROS1,ACTN1,APAF1,CLU,DBH,HGF,TF
GO:CC	cytoplasmic vesicle lumen	GO:0060205	0.0381528	1.41847	324	221	12	22115	CNN2,COTL1,FABP5,GRN,GSN,PROS1,ACTN1,APAF1,CLU,DBH,HGF,TF
GO:CC	nuclear envelope lumen	GO:0005641	0.0392231	1.40646	10	221	3	22115	IGF2R,BCHE,SORL1
GO:CC	vesicle lumen	GO:0031983	0.0392722	1.40592	325	221	12	22115	CNN2,COTL1,FABP5,GRN,GSN,PROS1,ACTN1,APAF1,CLU,DBH,HGF,TF
GO:CC	autophagosome	GO:0005776	0.0421266	1.37544	110	221	7	22115	ATG5,BECN1,LAMP1,LAMP2,OPTN,RAB7A,HAP1
GO:CC	transcription repressor complex	GO:0017053	0.0427126	1.36944	77	221	6	22115	HDAC1,MDM2,RELB,SIN3A,TP53,CCND1
GO:CC	distal axon	GO:0150034	0.0427696	1.36886	279	221	11	22115	ADRA2A,NGFR,SYP,ABL1,CALB2,CNR1,DRD2,GAD1,HAP1,PRKCG,TENM2
GO:CC	plasma membrane protein complex	GO:0098797	0.0445582	1.35107	723	221	19	22115	ABCC8,CD8A,DLG4,GRIA1,GRIA2,GRIN2B,RAC1,RIPK1,S100A10,AMIGO1,APC,CACNA1C,CACNB4,CHRNA7,DRD2,HCN1,ITGA7,RYR1,TF
KEGG	MAPK signaling pathway	KEGG:04010	1.75685e-07	6.75527	301	173	25	8484	AKT2,BDNF,DUSP7,HSPB1,JUN,MAP3K1,MEF2C,NGFR,PAK1,PRKACA,RAC1,RELB,STMN1,TNFRSF1A,TP53,CACNA1C,CACNB4,FGF2,HGF,MAPKAPK2,NTF3,PPP3CA,PRKCG,PTPRR,RASGRP1
KEGG	Neurotrophin signaling pathway	KEGG:04722	1.76294e-07	6.75376	118	173	16	8484	AKT2,BCL2,BDNF,IRAK2,JUN,MAP3K1,NGFR,PIK3CA,RAC1,RHOA,RIPK2,TP53,ABL1,CAMK4,MAPKAPK2,NTF3
KEGG	Autophagy - animal	KEGG:04140	3.73149e-06	5.42812	165	173	17	8484	AKT2,ATG3,ATG5,BCL2,BECN1,BNIP3,EPG5,LAMP1,LAMP2,OPTN,PIK3CA,PRKACA,PRKCQ,RAB7A,AKT1S1,ITPR1,PRKAA2
KEGG	Oxytocin signaling pathway	KEGG:04921	8.54778e-06	5.06815	154	173	16	8484	CDKN1A,JUN,MEF2C,PRKACA,RHOA,ADCY9,CACNA1C,CACNB4,CAMK4,CCND1,ITPR1,PPP3CA,PRKAA2,PRKCG,RYR1,RYR2
KEGG	cAMP signaling pathway	KEGG:04024	1.23723e-05	4.90755	223	173	19	8484	AKT2,BDNF,EP300,GRIA1,GRIA2,GRIN2B,JUN,PAK1,PIK3CA,PRKACA,RAC1,RHOA,SOX9,ADCY9,ADCYAP1,CACNA1C,CAMK4,DRD2,RYR2
KEGG	Longevity regulating pathway	KEGG:04211	2.2135e-05	4.65492	89	173	12	8484	AKT2,ATG5,EHMT2,PIK3CA,PRKACA,SESN1,SOD2,TP53,ADCY9,AKT1S1,CAMK4,PRKAA2
KEGG	Human T-cell leukemia virus 1 infection	KEGG:05166	4.34928e-05	4.36158	218	173	18	8484	AKT2,ATR,CDKN1A,EP300,JUN,KAT2A,KAT2B,MAP3K1,PIK3CA,PRKACA,RELB,TNFRSF1A,TP53,ADCY9,CCND1,CRTC2,PPP3CA,TSPO
KEGG	Cocaine addiction	KEGG:05030	5.21252e-05	4.28295	49	173	9	8484	BDNF,DLG4,GRIA2,GRIN2B,GRM2,GRM3,JUN,PRKACA,DRD2
KEGG	Glutamatergic synapse	KEGG:04724	5.55769e-05	4.25511	115	173	13	8484	DLG4,GRIA1,GRIA2,GRIN2B,GRM2,GRM3,PRKACA,SLC17A6,ADCY9,CACNA1C,ITPR1,PPP3CA,PRKCG
KEGG	Shigellosis	KEGG:05131	5.74043e-05	4.24106	246	173	19	8484	AKT2,ATG5,BCL2,BECN1,BNIP3,DOCK1,JUN,MDM2,PIK3CA,PRKCQ,RAC1,RHOA,RIPK1,RIPK2,TNFRSF1A,TP53,ACTN1,AKT1S1,ITPR1
KEGG	Viral carcinogenesis	KEGG:05203	6.6173e-05	4.17932	201	173	17	8484	CDKN1A,EP300,GSN,HDAC1,JUN,KAT2A,KAT2B,MDM2,PIK3CA,PRKACA,RAC1,RHOA,TP53,ACTN1,CCND1,HDAC7,MAPKAPK2
KEGG	Long-term potentiation	KEGG:04720	8.99756e-05	4.04588	67	173	10	8484	EP300,GRIA1,GRIA2,GRIN2B,PRKACA,CACNA1C,CAMK4,ITPR1,PPP3CA,PRKCG
KEGG	Amphetamine addiction	KEGG:05031	0.000119104	3.92407	69	173	10	8484	GRIA1,GRIA2,GRIN2B,HDAC1,JUN,PRKACA,CACNA1C,CAMK4,PPP3CA,PRKCG
KEGG	Colorectal cancer	KEGG:05210	0.000123888	3.90697	86	173	11	8484	AKT2,BCL2,CDKN1A,JUN,PIK3CA,RAC1,RALB,RHOA,TP53,APC,CCND1
KEGG	Kaposi sarcoma-associated herpesvirus infection	KEGG:05167	0.000200892	3.69704	194	173	16	8484	AKT2,ATG3,BECN1,CDKN1A,EP300,IFNAR2,JUN,PIK3CA,RAC1,TNFRSF1A,TP53,CCND1,FGF2,ITPR1,MAPKAPK2,PPP3CA
KEGG	Pathways in cancer	KEGG:05200	0.000252878	3.59709	527	173	28	8484	AKT2,BCL2,CDKN1A,CKS1B,EP300,HDAC1,IFNAR2,JUN,MDM2,NFE2L2,NQO1,PIK3CA,PRKACA,RAC1,RALB,RHOA,TP53,ABL1,ADCY9,APAF1,APC,CCND1,COL4A2,FGF2,HGF,MMP2,PRKCG,RASGRP1
KEGG	Endocrine resistance	KEGG:01522	0.000337374	3.47189	95	173	11	8484	AKT2,BCL2,CDKN1A,JUN,MDM2,PIK3CA,PRKACA,TP53,ADCY9,CCND1,MMP2
KEGG	Focal adhesion	KEGG:04510	0.000341523	3.46658	202	173	16	8484	AKT2,BCL2,DOCK1,JUN,PAK1,PIK3CA,RAC1,RELN,RHOA,SPP1,ACTN1,CCND1,COL4A2,HGF,ITGA7,PRKCG
KEGG	Longevity regulating pathway - multiple species	KEGG:04213	0.000356646	3.44776	61	173	9	8484	AKT2,ATG5,HDAC1,PIK3CA,PRKACA,SOD2,ADCY9,AKT1S1,PRKAA2
KEGG	Proteoglycans in cancer	KEGG:05205	0.00041376	3.38325	205	173	16	8484	AKT2,CDKN1A,MDM2,MSN,PAK1,PIK3CA,PRKACA,RAC1,RHOA,TP53,CCND1,FGF2,HGF,ITPR1,MMP2,PRKCG
KEGG	Circadian entrainment	KEGG:04713	0.000414878	3.38208	97	173	11	8484	GRIA1,GRIA2,GRIN2B,PRKACA,ADCY9,ADCYAP1,CACNA1C,ITPR1,PRKCG,RYR1,RYR2
KEGG	Fluid shear stress and atherosclerosis	KEGG:05418	0.000446722	3.34996	138	173	13	8484	AKT2,BCL2,JUN,MEF2C,NFE2L2,NQO1,PIK3CA,RAC1,RHOA,TNFRSF1A,TP53,MMP2,PRKAA2
KEGG	Thyroid hormone signaling pathway	KEGG:04919	0.000619806	3.20774	121	173	12	8484	AKT2,EP300,HDAC1,KAT2A,KAT2B,MDM2,PIK3CA,PRKACA,SIN3A,TP53,CCND1,PRKCG
KEGG	Epstein-Barr virus infection	KEGG:05169	0.00120483	2.91907	198	173	15	8484	AKT2,BCL2,CDKN1A,HDAC1,IFNAR2,JUN,MDM2,PIK3CA,RAC1,RELB,RIPK1,SIN3A,TP53,APAF1,CCND1
KEGG	GABAergic synapse	KEGG:04727	0.00125333	2.90194	89	173	10	8484	PRKACA,SLC6A1,ADCY9,CACNA1C,GABRG2,GABRR1,GAD1,HAP1,PRKCG,SLC12A5
KEGG	Nicotine addiction	KEGG:05033	0.00141739	2.84851	40	173	7	8484	GRIA1,GRIA2,GRIN2B,SLC17A6,CHRNA7,GABRG2,GABRR1
KEGG	Cellular senescence	KEGG:04218	0.0015989	2.79618	155	173	13	8484	AKT2,ATR,CDKN1A,MDM2,MRE11,PIK3CA,RAD50,RAD9A,TP53,CCND1,ITPR1,MAPKAPK2,PPP3CA
KEGG	p53 signaling pathway	KEGG:04115	0.00181102	2.74208	74	173	9	8484	ATR,BCL2,CDKN1A,MDM2,SESN1,TNFRSF10B,TP53,APAF1,CCND1
KEGG	Apoptosis	KEGG:04210	0.00191235	2.71843	135	173	12	8484	AKT2,BCL2,CASP2,CASP6,JUN,PIK3CA,RIPK1,TNFRSF10B,TNFRSF1A,TP53,APAF1,ITPR1
KEGG	Ras signaling pathway	KEGG:04014	0.0023382	2.63112	235	173	16	8484	AKT2,BDNF,GRIN2B,NGFR,PAK1,PIK3CA,PRKACA,RAC1,RALB,RHOA,ABL1,FGF2,HGF,NTF3,PRKCG,RASGRP1
KEGG	Apelin signaling pathway	KEGG:04371	0.00238777	2.62201	138	173	12	8484	AKT2,BECN1,MEF2C,PRKACA,SPP1,ADCY9,CAMK4,CCND1,ITPR1,PRKAA2,RYR1,RYR2
KEGG	Lipid and atherosclerosis	KEGG:05417	0.0030343	2.51794	214	173	15	8484	AKT2,BCL2,CASP6,JUN,NFE2L2,PIK3CA,RAC1,RHOA,SOD2,TNFRSF10B,TNFRSF1A,TP53,APAF1,ITPR1,PPP3CA
KEGG	PI3K-Akt signaling pathway	KEGG:04151	0.00364746	2.43801	356	173	20	8484	AKT2,BCL2,BDNF,CDKN1A,IFNAR2,MDM2,NGFR,PIK3CA,RAC1,RELN,SPP1,TP53,CCND1,COL4A2,CRTC2,FGF2,HGF,ITGA7,NTF3,PRKAA2
KEGG	Human cytomegalovirus infection	KEGG:05163	0.00489939	2.30986	223	173	15	8484	AKT2,CDKN1A,MDM2,PIK3CA,PRKACA,RAC1,RHOA,RIPK1,TNFRSF1A,TP53,ADCY9,CCND1,ITPR1,PPP3CA,PRKCG
KEGG	C-type lectin receptor signaling pathway	KEGG:04625	0.00494436	2.30589	104	173	10	8484	AKT2,JUN,MDM2,PAK1,PIK3CA,RELB,RHOA,ITPR1,MAPKAPK2,PPP3CA
KEGG	Parathyroid hormone synthesis, secretion and action	KEGG:04928	0.00536982	2.27004	105	173	10	8484	BCL2,CDKN1A,MAFB,MEF2C,PRKACA,RHOA,ADCY9,ITPR1,NR4A2,PRKCG
KEGG	Renal cell carcinoma	KEGG:05211	0.00684632	2.16454	68	173	8	8484	AKT2,CDKN1A,EP300,JUN,PAK1,PIK3CA,RAC1,HGF
KEGG	Osteoclast differentiation	KEGG:04380	0.00779242	2.10833	132	173	11	8484	AKT2,IFNAR2,JUN,PIK3CA,RAC1,RELB,TMEM64,TNFRSF1A,CAMK4,ITPR1,PPP3CA
KEGG	Cholinergic synapse	KEGG:04725	0.0100449	1.99805	113	173	10	8484	AKT2,BCL2,PIK3CA,PRKACA,ADCY9,CACNA1C,CAMK4,CHRNA7,ITPR1,PRKCG
KEGG	Melanoma	KEGG:05218	0.010344	1.98531	72	173	8	8484	AKT2,CDKN1A,MDM2,PIK3CA,TP53,CCND1,FGF2,HGF
KEGG	Small cell lung cancer	KEGG:05222	0.0103986	1.98302	92	173	9	8484	AKT2,BCL2,CDKN1A,CKS1B,PIK3CA,TP53,APAF1,CCND1,COL4A2
KEGG	Human papillomavirus infection	KEGG:05165	0.0133678	1.87394	330	173	18	8484	AKT2,ATR,CDKN1A,EP300,HDAC1,IFNAR2,MDM2,PIK3CA,PRKACA,RELN,SPP1,TNFRSF1A,TP53,APC,ATP6V0E1,CCND1,COL4A2,ITGA7
KEGG	Glioma	KEGG:05214	0.0138433	1.85876	75	173	8	8484	AKT2,CDKN1A,MDM2,PIK3CA,TP53,CAMK4,CCND1,PRKCG
KEGG	Chronic myeloid leukemia	KEGG:05220	0.0152067	1.81797	76	173	8	8484	AKT2,CDKN1A,HDAC1,MDM2,PIK3CA,TP53,ABL1,CCND1
KEGG	VEGF signaling pathway	KEGG:04370	0.0187266	1.72754	59	173	7	8484	AKT2,HSPB1,PIK3CA,RAC1,MAPKAPK2,PPP3CA,PRKCG
KEGG	Retrograde endocannabinoid signaling	KEGG:04723	0.0217087	1.66337	148	173	11	8484	GRIA1,GRIA2,PRKACA,SLC17A6,ADCY9,CACNA1C,CNR1,GABRG2,GABRR1,ITPR1,PRKCG
KEGG	Tuberculosis	KEGG:05152	0.0239099	1.62142	175	173	12	8484	AKT2,BCL2,EP300,IRAK2,LAMP1,LAMP2,RAB7A,RHOA,RIPK2,TNFRSF1A,APAF1,PPP3CA
KEGG	Pathways of neurodegeneration - multiple diseases	KEGG:05022	0.0248533	1.60462	474	173	22	8484	BCL2,BDNF,BECN1,COX5B,DLG4,GRIA1,GRIA2,GRIN2B,OPTN,RAC1,TNFRSF1A,APAF1,APC,CACNA1C,CHRNA7,HAP1,ITPR1,PPP3CA,PRKCG,PRKN,RYR1,RYR2
KEGG	Lysine degradation	KEGG:00310	0.0283629	1.54725	63	173	7	8484	DOT1L,EHMT2,KMT2C,SETD1B,SETDB1,SUV39H1,SUV39H2
KEGG	GnRH secretion	KEGG:04929	0.0313065	1.50437	64	173	7	8484	AKT2,PIK3CA,SPP1,CACNA1C,HCN1,ITPR1,PRKCG
KEGG	Insulin secretion	KEGG:04911	0.0332224	1.47857	85	173	8	8484	ABCC8,PRKACA,TRPM4,ADCY9,ADCYAP1,CACNA1C,PRKCG,RYR2
KEGG	Dopaminergic synapse	KEGG:04728	0.0340485	1.4679	131	173	10	8484	AKT2,GRIA1,GRIA2,GRIN2B,PRKACA,CACNA1C,DRD2,ITPR1,PPP3CA,PRKCG
KEGG	Rap1 signaling pathway	KEGG:04015	0.0359822	1.44391	210	173	13	8484	AKT2,GRIN2B,NGFR,PIK3CA,RAC1,RALB,RHOA,ADCY9,CNR1,DRD2,FGF2,HGF,PRKCG
KEGG	Cell cycle	KEGG:04110	0.0362807	1.44032	157	173	11	8484	ATR,CDKN1A,EP300,HDAC1,MCM6,MDM2,PCNA,SMC1A,TP53,ABL1,CCND1
KEGG	Apoptosis - multiple species	KEGG:04215	0.0442924	1.35367	32	173	5	8484	BCL2,BECN1,NGFR,TNFRSF1A,APAF1
KEGG	Hepatitis B	KEGG:05161	0.0474487	1.32378	162	173	11	8484	AKT2,BCL2,CDKN1A,EP300,JUN,MAP3K1,PCNA,PIK3CA,TP53,APAF1,PRKCG
KEGG	Huntington disease	KEGG:05016	0.0494818	1.30555	305	173	16	8484	BDNF,BECN1,COX5B,DLG4,EP300,GRIA1,GRIA2,GRIN2B,HDAC1,SIN3A,SOD2,TP53,APAF1,HAP1,ITPR1,POLR2J
REAC	Signaling by Receptor Tyrosine Kinases	REAC:R-HSA-9006934	1.0746e-07	6.96875	507	192	32	10916	AKT2,APOE,BDNF,CSK,DLG4,DOCK1,DUSP7,EP300,GRIN2B,HDAC1,HSPB1,MEF2C,NRP2,PAK1,PIK3CA,PRKACA,RAC1,RALB,RHOA,SIN3A,SPP1,STMN1,ADCYAP1,ATP6V0E1,COL4A2,FGF2,GABRG2,HGF,ITPR1,MAPKAPK2,NTF3,POLR2J
REAC	Transcriptional Regulation by TP53	REAC:R-HSA-3700989	1.70868e-06	5.76734	359	192	25	10916	AGO4,AKT2,ATR,BNIP3L,CASP2,CASP6,CDKN1A,COX5B,EHMT2,EP300,HDAC1,JUN,MDM2,MRE11,PCNA,PRDX1,RAD50,RAD9A,RPA1,TNFRSF10B,TP53,APAF1,POLR2J,PRKAA2,TAF10
REAC	Transmission across Chemical Synapses	REAC:R-HSA-112315	2.32313e-06	5.63393	259	192	21	10916	DLG4,GRIA1,GRIA2,GRIN2B,MDM2,PPFIA4,PRKACA,PRKAR2A,PRKAR2B,RAC1,SLC6A1,ADCY9,BCHE,CACNB4,CAMK4,CHRNA7,GABRG2,GABRR1,GAD1,PRKAA2,PRKCG
REAC	Signal Transduction	REAC:R-HSA-162582	1.13866e-05	4.94361	2548	192	79	10916	ADRA2A,AGO4,AKT2,APOE,BAG4,BCL2,BDNF,BMI1,CASP2,CDKN1A,CSK,DLG4,DOCK1,DUSP7,EP300,FABP5,GRIN2B,GRM2,GRM3,HDAC1,HSPB1,JUN,KAT2A,KAT2B,MDM2,MEF2C,NGFR,NRP2,OPTN,PAK1,PIK3CA,PRKACA,PRKAR2A,PRKAR2B,PRKCQ,RAB7A,RAC1,RALB,RHOA,RIPK1,RIPK2,SIN3A,SMC1A,SOX9,SPP1,ST3GAL6,STMN1,TNFRSF10B,TNFRSF1A,TP53,ABL1,ACTN1,ADCY9,ADCYAP1,AKT1S1,APC,ARHGEF10,ATP6V0E1,CAMK4,CCND1,CNR1,CNTN1,COL4A2,CPT1B,DRD2,FGF2,GABRG2…
REAC	Intracellular signaling by second messengers	REAC:R-HSA-9006925	2.03356e-05	4.69174	293	192	21	10916	AGO4,AKT2,BMI1,CDKN1A,HDAC1,JUN,MDM2,PIK3CA,PRKACA,PRKAR2A,PRKAR2B,RAC1,TP53,ADCY9,AKT1S1,CAMK4,FGF2,HDAC7,HGF,ITPR1,PRKCG
REAC	Transcriptional Regulation by MECP2	REAC:R-HSA-8986944	3.05794e-05	4.51457	59	192	10	10916	AGO4,BDNF,GRIA2,GRIN2B,HDAC1,MEF2C,PRKACA,SIN3A,CAMK4,GAD1
REAC	Neuronal System	REAC:R-HSA-112316	6.22275e-05	4.20602	400	192	24	10916	ABCC8,DLG4,GRIA1,GRIA2,GRIN2B,MDM2,NLGN1,PPFIA4,PRKACA,PRKAR2A,PRKAR2B,RAC1,SLC6A1,ADCY9,BCHE,CACNB4,CAMK4,CHRNA7,GABRG2,GABRR1,GAD1,HCN1,PRKAA2,PRKCG
REAC	Generic Transcription Pathway	REAC:R-HSA-212436	8.53127e-05	4.06899	1235	192	47	10916	AGO4,AKT2,APOE,ATR,BDNF,BMI1,BNIP3L,CASP2,CASP6,CDKN1A,COX5B,EHMT2,EP300,GRIA2,GRIN2B,HDAC1,JUN,KAT2A,KAT2B,KMT2C,MDM2,MEF2C,MRE11,PCNA,PRDX1,PRKACA,PRKCQ,RAD50,RAD9A,RPA1,SETD1B,SIN3A,SOD2,SOX9,SPP1,TNFRSF10B,TP53,ABL1,APAF1,CAMK4,CCND1,GAD1,HDAC7,NR4A2,POLR2J,PRKAA2,TAF10
REAC	Hemostasis	REAC:R-HSA-109582	9.96064e-05	4.00171	673	192	32	10916	ADRA2A,CABLES1,CD47,CSK,DOCK1,EPCAM,HDAC1,JAM2,LAMP2,MAFF,PIK3CA,PRKACA,PRKAR2A,PRKAR2B,PRKCQ,PROS1,RAC1,RAD51B,RAD51C,RHOA,S100A10,SIN3A,TNFRSF10B,TP53,ABL1,ACTN1,CLU,HGF,ITPR1,PRKCG,RASGRP1,TF
REAC	Neurotransmitter receptors and postsynaptic signal transmission	REAC:R-HSA-112314	0.000156084	3.80664	196	192	16	10916	DLG4,GRIA1,GRIA2,GRIN2B,MDM2,PRKACA,PRKAR2A,PRKAR2B,RAC1,ADCY9,CAMK4,CHRNA7,GABRG2,GABRR1,PRKAA2,PRKCG
REAC	Gene expression (Transcription)	REAC:R-HSA-74160	0.000186168	3.73009	1519	192	53	10916	AGO4,AKT2,APOE,ATR,BDNF,BMI1,BNIP3L,CASP2,CASP6,CDKN1A,COX5B,DNMT3A,EHMT2,EP300,GRIA2,GRIN2B,HDAC1,JUN,KAT2A,KAT2B,KDM6A,KMT2C,MDM2,MEF2C,MRE11,PCNA,PRDX1,PRKACA,PRKCQ,RAD50,RAD9A,RPA1,SETD1B,SIN3A,SOD2,SOX9,SPP1,SUV39H1,TARBP2,TET1,TNFRSF10B,TP53,ABL1,APAF1,CAMK4,CCND1,CXXC1,GAD1,HDAC7,NR4A2,POLR2J,PRKAA2,TAF10
REAC	Death Receptor Signaling	REAC:R-HSA-73887	0.000218285	3.66098	153	192	14	10916	BAG4,CASP2,HDAC1,NGFR,OPTN,RAC1,RHOA,RIPK1,RIPK2,TNFRSF10B,TNFRSF1A,ARHGEF10,MAPKAPK2,USP21
REAC	Post NMDA receptor activation events	REAC:R-HSA-438064	0.000358547	3.44545	76	192	10	10916	DLG4,GRIA1,GRIA2,GRIN2B,PRKACA,PRKAR2A,PRKAR2B,RAC1,CAMK4,PRKAA2
REAC	Innate Immune System	REAC:R-HSA-168249	0.000411149	3.386	1099	192	42	10916	ATG5,BCL2,CASP2,CD47,CNN2,COTL1,DOCK1,DUSP7,EP300,FABP5,GRN,GSN,IGF2R,IRAK2,JUN,LAMP1,LAMP2,LGMN,MAP3K1,MEF2C,MRE11,PAK1,PIK3CA,PRKACA,PRKCQ,PROS1,RAB7A,RAC1,RELB,RHOA,RIPK1,RIPK2,TP53,ABL1,APAF1,ATP6V0E1,CLU,ITPR1,MAPKAPK2,PLEKHO2,PPP3CA,RASGRP1
REAC	Disease	REAC:R-HSA-1643685	0.000788046	3.10345	1767	192	57	10916	ABCC8,AKT2,ATR,BAG4,BECN1,CDKN1A,CSK,CYP7B1,DNMT3A,DOCK1,DUSP7,EP300,HDAC1,HPRT1,IRAK2,JUN,KAT2A,KAT2B,LIG1,MDM2,MRE11,MSN,NFE2L2,NTHL1,PIK3CA,PRDX1,PRKACA,PRKAR2A,PRKAR2B,RAB7A,RAC1,RAD50,RAD51B,RAD51C,RAD9A,RIPK1,RIPK2,RPA1,RPL28,SIN3A,SOD2,TP53,VPS4A,ABL1,ADCY9,AKT1S1,APC,CAMK4,CCND1,FGF2,HDAC7,HGF,ITPR1,NAGLU,POLR2J,SMN1,TAF10
REAC	Signaling by VEGF	REAC:R-HSA-194138	0.00092188	3.03533	104	192	11	10916	AKT2,DOCK1,HSPB1,NRP2,PAK1,PIK3CA,PRKACA,RAC1,RHOA,ITPR1,MAPKAPK2
REAC	Diseases of DNA repair	REAC:R-HSA-9675135	0.00103597	2.98465	50	192	8	10916	ATR,MRE11,NTHL1,RAD50,RAD51B,RAD51C,RAD9A,RPA1
REAC	HDR through Homologous Recombination (HRR)	REAC:R-HSA-5685942	0.00123357	2.90884	68	192	9	10916	ATR,MRE11,PCNA,POLE,RAD50,RAD51B,RAD51C,RAD9A,RPA1
REAC	RNA Polymerase II Transcription	REAC:R-HSA-73857	0.00127476	2.89457	1356	192	47	10916	AGO4,AKT2,APOE,ATR,BDNF,BMI1,BNIP3L,CASP2,CASP6,CDKN1A,COX5B,EHMT2,EP300,GRIA2,GRIN2B,HDAC1,JUN,KAT2A,KAT2B,KMT2C,MDM2,MEF2C,MRE11,PCNA,PRDX1,PRKACA,PRKCQ,RAD50,RAD9A,RPA1,SETD1B,SIN3A,SOD2,SOX9,SPP1,TNFRSF10B,TP53,ABL1,APAF1,CAMK4,CCND1,GAD1,HDAC7,NR4A2,POLR2J,PRKAA2,TAF10
REAC	Signaling by NTRKs	REAC:R-HSA-166520	0.00145628	2.83675	131	192	12	10916	BDNF,DUSP7,EP300,GRIN2B,MEF2C,PIK3CA,RAC1,RALB,RHOA,ADCYAP1,MAPKAPK2,NTF3
REAC	Activation of NMDA receptors and postsynaptic events	REAC:R-HSA-442755	0.0015671	2.8049	89	192	10	10916	DLG4,GRIA1,GRIA2,GRIN2B,PRKACA,PRKAR2A,PRKAR2B,RAC1,CAMK4,PRKAA2
REAC	Regulation of TP53 Activity	REAC:R-HSA-5633007	0.00215588	2.66638	160	192	13	10916	AKT2,ATR,EHMT2,EP300,HDAC1,MDM2,MRE11,RAD50,RAD9A,RPA1,TP53,PRKAA2,TAF10
REAC	Presynaptic phase of homologous DNA pairing and strand exchange	REAC:R-HSA-5693616	0.00244253	2.61216	40	192	7	10916	ATR,MRE11,RAD50,RAD51B,RAD51C,RAD9A,RPA1
REAC	VEGFA-VEGFR2 Pathway	REAC:R-HSA-4420097	0.00258223	2.58801	94	192	10	10916	AKT2,DOCK1,HSPB1,PAK1,PIK3CA,PRKACA,RAC1,RHOA,ITPR1,MAPKAPK2
REAC	Chromatin organization	REAC:R-HSA-4839726	0.00259234	2.58631	271	192	17	10916	DNMT3A,DOT1L,EHMT2,EP300,HDAC1,KAT2A,KAT2B,KDM4D,KDM5C,KDM6A,KMT2C,SETD1B,SETDB1,SUV39H1,SUV39H2,CCND1,TAF10
REAC	Chromatin modifying enzymes	REAC:R-HSA-3247509	0.00259234	2.58631	271	192	17	10916	DNMT3A,DOT1L,EHMT2,EP300,HDAC1,KAT2A,KAT2B,KDM4D,KDM5C,KDM6A,KMT2C,SETD1B,SETDB1,SUV39H1,SUV39H2,CCND1,TAF10
REAC	Defective homologous recombination repair (HRR) due to BRCA2 loss of function	REAC:R-HSA-9701190	0.00290194	2.53731	41	192	7	10916	ATR,MRE11,RAD50,RAD51B,RAD51C,RAD9A,RPA1
REAC	Diseases of DNA Double-Strand Break Repair	REAC:R-HSA-9675136	0.00290194	2.53731	41	192	7	10916	ATR,MRE11,RAD50,RAD51B,RAD51C,RAD9A,RPA1
REAC	DAG and IP3 signaling	REAC:R-HSA-1489509	0.00290194	2.53731	41	192	7	10916	PRKACA,PRKAR2A,PRKAR2B,ADCY9,CAMK4,ITPR1,PRKCG
REAC	Cellular responses to stress	REAC:R-HSA-2262752	0.00339302	2.46941	792	192	32	10916	AGO4,AKT2,ATF3,ATR,BAG3,BAG4,BCL2,BMI1,CDKN1A,COX5B,EHMT2,EP300,JUN,MDM2,MEF2C,MRE11,NFE2L2,NQO1,PRDX1,RAD50,RPA1,RPL28,SESN1,SIN3A,SOD2,TP53,AKT1S1,ATP6V0E1,CRTC2,CXXC1,MAPKAPK2,PRKAA2
REAC	Factors involved in megakaryocyte development and platelet production	REAC:R-HSA-983231	0.003931	2.4055	169	192	13	10916	CABLES1,DOCK1,HDAC1,MAFF,PRKACA,PRKAR2A,PRKAR2B,RAC1,RAD51B,RAD51C,SIN3A,TP53,ABL1
REAC	Homologous DNA Pairing and Strand Exchange	REAC:R-HSA-5693579	0.00403763	2.39387	43	192	7	10916	ATR,MRE11,RAD50,RAD51B,RAD51C,RAD9A,RPA1
REAC	Cellular responses to stimuli	REAC:R-HSA-8953897	0.00486206	2.31318	806	192	32	10916	AGO4,AKT2,ATF3,ATR,BAG3,BAG4,BCL2,BMI1,CDKN1A,COX5B,EHMT2,EP300,JUN,MDM2,MEF2C,MRE11,NFE2L2,NQO1,PRDX1,RAD50,RPA1,RPL28,SESN1,SIN3A,SOD2,TP53,AKT1S1,ATP6V0E1,CRTC2,CXXC1,MAPKAPK2,PRKAA2
REAC	PLC beta mediated events	REAC:R-HSA-112043	0.00984567	2.00675	49	192	7	10916	PRKACA,PRKAR2A,PRKAR2B,ADCY9,CAMK4,ITPR1,PRKCG
REAC	Epigenetic regulation of gene expression	REAC:R-HSA-212165	0.0103951	1.98317	185	192	13	10916	DNMT3A,EHMT2,EP300,HDAC1,KAT2A,KAT2B,KDM6A,KMT2C,SETD1B,SIN3A,SUV39H1,TET1,CXXC1
REAC	Signaling by NTRK2 (TRKB)	REAC:R-HSA-9006115	0.0118624	1.92583	21	192	5	10916	BDNF,GRIN2B,PIK3CA,RAC1,NTF3
REAC	Pervasive developmental disorders	REAC:R-HSA-9005895	0.0127487	1.89454	11	192	4	10916	HDAC1,PRKACA,SIN3A,CAMK4
REAC	Loss of function of MECP2 in Rett syndrome	REAC:R-HSA-9005891	0.0127487	1.89454	11	192	4	10916	HDAC1,PRKACA,SIN3A,CAMK4
REAC	Disorders of Nervous System Development	REAC:R-HSA-9697154	0.0127487	1.89454	11	192	4	10916	HDAC1,PRKACA,SIN3A,CAMK4
REAC	Disorders of Developmental Biology	REAC:R-HSA-9675151	0.0127487	1.89454	11	192	4	10916	HDAC1,PRKACA,SIN3A,CAMK4
REAC	Calmodulin induced events	REAC:R-HSA-111933	0.0133318	1.87511	35	192	6	10916	PRKACA,PRKAR2A,PRKAR2B,ADCY9,CAMK4,PRKCG
REAC	CaM pathway	REAC:R-HSA-111997	0.0133318	1.87511	35	192	6	10916	PRKACA,PRKAR2A,PRKAR2B,ADCY9,CAMK4,PRKCG
REAC	Regulation of TP53 Activity through Phosphorylation	REAC:R-HSA-6804756	0.0151278	1.82022	92	192	9	10916	ATR,MDM2,MRE11,RAD50,RAD9A,RPA1,TP53,PRKAA2,TAF10
REAC	HDR through Single Strand Annealing (SSA)	REAC:R-HSA-5685938	0.0185445	1.73178	37	192	6	10916	ATR,MRE11,RAD50,RAD9A,RPA1,ABL1
REAC	Ca-dependent events	REAC:R-HSA-111996	0.0185445	1.73178	37	192	6	10916	PRKACA,PRKAR2A,PRKAR2B,ADCY9,CAMK4,PRKCG
REAC	G-protein mediated events	REAC:R-HSA-112040	0.0188476	1.72474	54	192	7	10916	PRKACA,PRKAR2A,PRKAR2B,ADCY9,CAMK4,ITPR1,PRKCG
REAC	TP53 Regulates Transcription of Caspase Activators and Caspases	REAC:R-HSA-6803207	0.0188604	1.72445	12	192	4	10916	CASP2,CASP6,TP53,APAF1
REAC	SUMO E3 ligases SUMOylate target proteins	REAC:R-HSA-3108232	0.0218803	1.65995	171	192	12	10916	BMI1,DNMT3A,EP300,HDAC1,MDM2,PCNA,RPA1,SIN3A,SMC1A,TP53,HDAC7,NR4A2
REAC	Platelet activation, signaling and aggregation	REAC:R-HSA-76002	0.0237511	1.62432	259	192	15	10916	ADRA2A,CSK,LAMP2,PIK3CA,PRKCQ,PROS1,RAC1,RHOA,ACTN1,CLU,HGF,ITPR1,PRKCG,RASGRP1,TF
REAC	Signaling by Nuclear Receptors	REAC:R-HSA-9006931	0.0238698	1.62215	290	192	16	10916	AGO4,AKT2,APOE,BCL2,EP300,FABP5,HDAC1,HSPB1,JUN,KAT2B,PIK3CA,SMC1A,CCND1,CPT1B,MMP2,POLR2J
REAC	Cell Cycle	REAC:R-HSA-1640170	0.0240405	1.61906	677	192	27	10916	AKT2,ATR,CABLES1,CDKN1A,CKS1B,EP300,HDAC1,LIG1,MCM6,MDM2,MRE11,NCAPH,OPTN,PCNA,POLE,PRKACA,PRKAR2B,RAD50,RAD51C,RAD9A,RPA1,SMC1A,TP53,VPS4A,ABL1,CCND1,POLR2J
REAC	Mitotic G1 phase and G1/S transition	REAC:R-HSA-453279	0.0253576	1.59589	147	192	11	10916	AKT2,CABLES1,CDKN1A,CKS1B,HDAC1,MCM6,PCNA,POLE,RPA1,ABL1,CCND1
REAC	SUMOylation	REAC:R-HSA-2990846	0.0306114	1.51412	177	192	12	10916	BMI1,DNMT3A,EP300,HDAC1,MDM2,PCNA,RPA1,SIN3A,SMC1A,TP53,HDAC7,NR4A2
REAC	Formation of WDR5-containing histone-modifying complexes	REAC:R-HSA-9772755	0.0338321	1.47067	41	192	6	10916	KAT2A,KAT2B,KDM6A,KMT2C,SETD1B,CXXC1
REAC	Epigenetic regulation by WDR5-containing histone modifying complexes	REAC:R-HSA-9917777	0.0338321	1.47067	41	192	6	10916	KAT2A,KAT2B,KDM6A,KMT2C,SETD1B,CXXC1
REAC	AKT phosphorylates targets in the cytosol	REAC:R-HSA-198323	0.0371002	1.43062	14	192	4	10916	AKT2,CDKN1A,MDM2,AKT1S1
REAC	Glutamate binding, activation of AMPA receptors and synaptic plasticity	REAC:R-HSA-399721	0.0431941	1.36458	27	192	5	10916	DLG4,GRIA1,GRIA2,MDM2,PRKCG
REAC	Trafficking of AMPA receptors	REAC:R-HSA-399719	0.0431941	1.36458	27	192	5	10916	DLG4,GRIA1,GRIA2,MDM2,PRKCG
REAC	G1/S Transition	REAC:R-HSA-69206	0.0440372	1.35618	130	192	10	10916	AKT2,CABLES1,CDKN1A,CKS1B,HDAC1,MCM6,PCNA,POLE,RPA1,CCND1
REAC	Activated NTRK2 signals through FYN	REAC:R-HSA-9032500	0.0472683	1.32543	6	192	3	10916	BDNF,GRIN2B,RAC1
REAC	Integration of energy metabolism	REAC:R-HSA-163685	0.0497881	1.30287	107	192	9	10916	ABCC8,ADRA2A,PRKACA,PRKAR2A,PRKAR2B,ADCY9,CACNA1C,ITPR1,PRKAA2
WP	ADHD and autism ASD pathways	WP:WP5420	4.66497e-10	9.33115	363	182	32	8722	AKT2,ATG3,ATG5,BECN1,DLG4,GRIA1,GRIA2,GRIN2B,GRM2,GRM3,HPRT1,NLGN1,PIK3CA,PRKACA,PRKAR2B,RHOA,SESN1,SLC17A6,SLC6A1,SOD2,SYP,ABL1,AKT1S1,CACNA1C,CNR1,CNTN1,DBH,DRD2,GABRG2,GAD1,PRKAA2,PRKCG
WP	MAPK signaling	WP:WP382	3.88701e-08	7.41038	245	182	24	8722	AKT2,BDNF,DUSP7,HSPB1,JUN,MAP3K1,MEF2C,PAK1,PRKACA,RAC1,RELB,STMN1,TNFRSF1A,TP53,CACNA1C,CACNB4,FGF12,FGF2,MAPKAPK2,NTF3,PPP3CA,PRKCG,PTPRR,RASGRP1
WP	ATM signaling	WP:WP2516	5.99626e-08	7.22212	40	182	11	8722	CASP2,CDKN1A,JUN,MDM2,MRE11,RAD50,RAD9A,RIPK1,SMC1A,TP53,ABL1
WP	DNA damage response	WP:WP707	2.34815e-07	6.62927	69	182	13	8722	ATR,CDKN1A,MDM2,MRE11,RAD50,RAD9A,SESN1,SMC1A,TNFRSF10B,TP53,ABL1,APAF1,CCND1
WP	miRNA regulation of DNA damage response	WP:WP1530	4.8734e-07	6.31217	73	182	13	8722	ATR,CDKN1A,MDM2,MRE11,RAD50,RAD9A,SESN1,SMC1A,TNFRSF10B,TP53,ABL1,APAF1,CCND1
WP	Retinoblastoma gene in cancer	WP:WP2446	6.37065e-07	6.19582	89	182	14	8722	CDKN1A,HDAC1,MCM6,MDM2,PCNA,POLE,RPA1,SIN3A,SMC1A,STMN1,SUV39H1,TP53,ABL1,CCND1
WP	Fragile X syndrome	WP:WP4549	6.42874e-07	6.19187	121	182	16	8722	BDNF,DLG4,GRIA1,GRIA2,GRIN2B,PRKACA,SLC6A1,TARBP2,AKT1S1,CAMK4,CNR1,GABRG2,GAD1,HCN1,ITPR1,PPP3CA
WP	Pleural mesothelioma	WP:WP5087	3.92743e-06	5.40589	435	182	29	8722	AKT2,ATF3,BCL2,BDNF,BECN1,BMI1,CD47,CDKN1A,JUN,KDM6A,KMT2C,MAP3K1,MDM2,NGFR,PAK1,PIK3CA,SETDB1,TP53,AKT1S1,APC,CCND1,COL4A2,FGF12,FGF2,HGF,MAPKAPK2,MMP2,NTF3,PRKAA2
WP	Neural crest cell migration during development	WP:WP4564	1.38287e-05	4.85922	39	182	9	8722	AKT2,BDNF,JUN,NGFR,PAK1,PIK3CA,RAC1,RHOA,MMP2
WP	Neural crest cell migration in cancer	WP:WP4565	2.7569e-05	4.55958	42	182	9	8722	AKT2,BDNF,JUN,NGFR,PAK1,PIK3CA,RAC1,RHOA,MMP2
WP	Fas ligand pathway and stress induction of heat shock proteins	WP:WP314	2.7569e-05	4.55958	42	182	9	8722	BCL2,CASP6,HSPB1,JUN,MAP3K1,PAK1,RIPK2,APAF1,MAPKAPK2
WP	DNA IR double strand breaks and cellular response via ATM	WP:WP3959	2.88213e-05	4.54029	55	182	10	8722	ATR,MDM2,MRE11,PCNA,RAD50,RAD9A,SMC1A,TP53,ABL1,APAF1
WP	Effect of omega 3 PUFA on Huntington 39 s disease pathways	WP:WP5470	3.17844e-05	4.49779	120	182	14	8722	AKT2,APOE,BCL2,BDNF,BNIP3,HDAC1,PIK3CA,SIN3A,AKT1S1,GABRG2,HAP1,ITPR1,PRKAA2,SLC12A5
WP	Apoptosis	WP:WP254	3.91188e-05	4.40761	87	182	12	8722	BCL2,BNIP3L,CASP2,CASP6,JUN,MAP3K1,MDM2,RIPK1,TNFRSF10B,TNFRSF1A,TP53,APAF1
WP	DNA damage response only ATM dependent	WP:WP710	6.86255e-05	4.16351	109	182	13	8722	AKT2,BCL2,CDKN1A,JUN,MAP3K1,MDM2,PIK3CA,RAC1,RHOA,TP53,ABL1,APC,CCND1
WP	HDAC6 interactions in the central nervous system	WP:WP5426	9.44265e-05	4.02491	112	182	13	8722	APOE,BCL2,BDNF,DLG4,EP300,GRIA1,GRIA2,HSPB1,OPTN,PRDX1,RAC1,APC,PRKN
WP	Integrated breast cancer pathway	WP:WP1984	0.00010439	3.98134	152	182	15	8722	ATR,BCL2,EP300,GRN,HDAC1,JUN,MDM2,MRE11,PAK1,RAC1,RAD50,TP53,ABL1,CCND1,USP21
WP	Molecular pathway for oxidative stress	WP:WP5477	0.000112008	3.95075	49	182	9	8722	ATR,BCL2,CDKN1A,MDM2,NFE2L2,NQO1,PIK3CA,SOD2,TP53
WP	Brain derived neurotrophic factor BDNF signaling	WP:WP2380	0.000164966	3.7826	137	182	14	8722	BDNF,GRIA1,GRIA2,GRIN2B,JUN,MAP3K1,MEF2C,NGFR,RAC1,APC,CAMK4,CNR1,NTF3,PRKAA2
WP	Androgen receptor signaling	WP:WP138	0.000244764	3.61125	85	182	11	8722	EP300,HDAC1,JUN,KAT2B,MDM2,PRDX1,RAC1,RAD9A,RHOA,SIN3A,CCND1
WP	Apoptosis modulation by HSP70	WP:WP384	0.000299245	3.52397	19	182	6	8722	CASP2,CASP6,MAP3K1,RIPK1,TNFRSF1A,APAF1
WP	Apoptosis modulation and signaling	WP:WP1772	0.000435988	3.36053	90	182	11	8722	BAG3,BCL2,BNIP3,CASP2,CASP6,JUN,RIPK1,TNFRSF10B,TNFRSF1A,TP53,APAF1
WP	Chromosomal and microsatellite instability in colorectal cancer	WP:WP4216	0.00044239	3.35419	73	182	10	8722	AKT2,BCL2,CDKN1A,JUN,RAC1,RALB,RHOA,TP53,APC,CCND1
WP	Androgen receptor network in prostate cancer	WP:WP2263	0.000463549	3.3339	109	182	12	8722	ATR,BCL2,DOCK1,JUN,MDM2,MRE11,PAK1,PIK3CA,RAD50,TP53,CCND1,HGF
WP	TGF beta signaling pathway	WP:WP366	0.000571368	3.24308	131	182	13	8722	ATF3,CDKN1A,DAB2,EP300,HDAC1,JUN,MEF2C,PRKAR2A,RAC1,RHOA,SIN3A,TP53,CCND1
WP	Focal adhesion	WP:WP306	0.000633436	3.1983	198	182	16	8722	AKT2,BCL2,DOCK1,JUN,PAK1,PIK3CA,RAC1,RELN,RHOA,SPP1,ACTN1,CCND1,COL4A2,HGF,ITGA7,PRKCG
WP	Cancer pathways	WP:WP5434	0.000983816	3.00709	505	182	27	8722	AKT2,BCL2,CDKN1A,CKS1B,EP300,HDAC1,IFNAR2,JUN,MDM2,NFE2L2,NQO1,PIK3CA,PRKACA,RAC1,RALB,RHOA,TP53,ABL1,ADCY9,APAF1,APC,CCND1,COL4A2,HGF,MMP2,PRKCG,RASGRP1
WP	Microtubule cytoskeleton regulation	WP:WP2038	0.00103603	2.98463	48	182	8	8722	PAK1,PRKACA,RAC1,STMN1,ABL1,APC,CAMK4,MAPKAPK2
WP	Neuroinflammation and glutamatergic signaling	WP:WP5083	0.00119876	2.92127	140	182	13	8722	BCL2,BDNF,GRIA1,GRIA2,GRIN2B,GRM2,PRKACA,SLC17A6,TNFRSF1A,TRPM4,CAMK4,FGF2,PRKCG
WP	Photodynamic therapy induced AP 1 survival signaling	WP:WP3611	0.00142246	2.84696	50	182	8	8722	BCL2,CDKN1A,JUN,NFE2L2,TNFRSF1A,TP53,CCND1,MMP2
WP	Synaptic signaling associated with autism spectrum disorder	WP:WP4539	0.00142246	2.84696	50	182	8	8722	AKT2,BDNF,DLG4,GRIN2B,PIK3CA,CACNA1C,CAMK4,PRKAA2
WP	Amyotrophic lateral sclerosis ALS	WP:WP2447	0.00169235	2.77151	37	182	7	8722	BCL2,GRIA1,RAC1,TNFRSF1A,TP53,APAF1,PPP3CA
WP	Melanoma	WP:WP4685	0.00191044	2.71887	68	182	9	8722	AKT2,CDKN1A,GRM3,MDM2,PAK1,PIK3CA,RAC1,TP53,CCND1
WP	Apoptosis related network due to altered Notch3 in ovarian cancer	WP:WP2864	0.0022262	2.65244	53	182	8	8722	APOE,CDKN1A,HDAC1,HSPB1,NQO1,RIPK2,TNFRSF10B,ABL1
WP	ErbB signaling	WP:WP673	0.00271336	2.56649	89	182	10	8722	AKT2,CDKN1A,JUN,MDM2,PAK1,PIK3CA,TP53,ABL1,CCND1,PRKCG
WP	Myometrial relaxation and contraction pathways	WP:WP289	0.00338602	2.47031	154	182	13	8722	ATF3,CNN2,JUN,MAFF,PRKACA,PRKAR2A,PRKAR2B,PRKCQ,ADCY9,ITPR1,PRKCG,RYR1,RYR2
WP	Cell lineage map for neuronal differentiation	WP:WP5417	0.00340139	2.46834	132	182	12	8722	ADRA2A,DLG4,GRIN2B,NGFR,NLGN1,SLC17A6,SLC6A1,SOX9,SYP,GAD1,NES,NR4A2
WP	NRXN1 deletion syndrome	WP:WP5398	0.00343684	2.46384	17	182	5	8722	DLG4,GRIA1,GRIA2,GRIN2B,NLGN1
WP	PI3K Akt signaling	WP:WP4172	0.00397638	2.40051	336	182	20	8722	AKT2,BCL2,BDNF,CDKN1A,IFNAR2,MDM2,NGFR,PIK3CA,RAC1,RELN,SPP1,TP53,CCND1,COL4A2,FGF12,FGF2,HGF,ITGA7,NTF3,PRKAA2
WP	Gastrin signaling	WP:WP4659	0.00436805	2.35971	114	182	11	8722	CDKN1A,JUN,MEF2C,PAK1,PIK3CA,PRKACA,PRKCQ,RAC1,RHOA,CCND1,HDAC7
WP	Integrated cancer pathway	WP:WP1971	0.00556857	2.25426	44	182	7	8722	ATR,BCL2,CDKN1A,MDM2,MRE11,RAD50,TP53
WP	Perturbations to host cell autophagy induced by SARS CoV 2 proteins	WP:WP4936	0.00556857	2.25426	44	182	7	8722	ATG3,ATG5,LAMP2,OPTN,RAB7A,AKT1S1,PRKAA2
WP	TP53 network	WP:WP1742	0.00624262	2.20463	19	182	5	8722	BCL2,CDKN1A,MDM2,TP53,ABL1
WP	Hallmark of cancer sustaining proliferative signaling	WP:WP5475	0.00635519	2.19687	98	182	10	8722	AKT2,CDKN1A,JUN,MDM2,NGFR,PIK3CA,TP53,AKT1S1,APC,CCND1
WP	miRNA regulation of prostate cancer signaling	WP:WP3981	0.00659283	2.18093	31	182	6	8722	BCL2,CDKN1A,MDM2,PIK3CA,TP53,CCND1
WP	Cell cycle	WP:WP179	0.00706935	2.15062	120	182	11	8722	ATR,CDKN1A,EP300,HDAC1,MCM6,MDM2,PCNA,SMC1A,TP53,ABL1,CCND1
WP	DNA IR damage and cellular response via ATR	WP:WP4016	0.0080127	2.09622	81	182	9	8722	ATR,MDM2,MRE11,PCNA,RAD50,RAD9A,RPA1,SMC1A,TP53
WP	Autophagy in pancreatic ductal adenocarcinoma	WP:WP5331	0.00818345	2.08706	20	182	5	8722	BECN1,MDM2,NFE2L2,TP53,PRKN
WP	Glioblastoma signaling	WP:WP2261	0.00884091	2.0535	82	182	9	8722	AKT2,CDKN1A,EP300,MDM2,PIK3CA,PRKCQ,TP53,CCND1,PRKCG
WP	G1 to S cell cycle control	WP:WP45	0.00914241	2.03894	64	182	8	8722	CDKN1A,MCM6,MDM2,PCNA,POLE,RPA1,TP53,CCND1
WP	Regulation of actin cytoskeleton	WP:WP51	0.0113609	1.94459	149	182	12	8722	CSK,DOCK1,GSN,MSN,PAK1,PIK3CA,RAC1,RHOA,ACTN1,APC,FGF12,FGF2
WP	Circadian rhythm genes	WP:WP3594	0.0130677	1.8838	200	182	14	8722	EP300,HDAC1,JUN,NGFR,NLGN1,RELB,SIN3A,SUV39H1,SUV39H2,TP53,DRD2,NAGLU,PRKAA2,PRKCG
WP	VEGFA VEGFR2 signaling	WP:WP3888	0.0153001	1.81531	430	182	22	8722	BCL2,CSK,HDAC1,HSPB1,JUN,MDM2,MEF2C,NRP2,PAK1,PIK3CA,RAC1,RHOA,SOD2,ABL1,AKT1S1,CCND1,HDAC7,MAPKAPK2,MMP2,NR4A2,PPP3CA,PRKAA2
WP	Pancreatic adenocarcinoma pathway	WP:WP4263	0.0154824	1.81016	88	182	9	8722	AKT2,CDKN1A,PAK1,PIK3CA,RAC1,RALB,RHOA,TP53,CCND1
WP	Unfolded protein response	WP:WP4925	0.0168802	1.77262	23	182	5	8722	BCL2,CASP2,NFE2L2,TNFRSF10B,TP53
WP	G protein signaling	WP:WP35	0.0169189	1.77163	89	182	9	8722	PRKACA,PRKAR2A,PRKAR2B,PRKCQ,RHOA,ADCY9,ITPR1,PPP3CA,PRKCG
WP	Serotonin HTR1 group and FOS pathway	WP:WP722	0.0187619	1.72672	37	182	6	8722	MAP3K1,PIK3CA,RHOA,ITPR1,MAPKAPK2,RASGRP1
WP	Cell type dependent selectivity of CCK2R signaling	WP:WP3679	0.0205797	1.68656	13	182	4	8722	CNR1,ITPR1,RYR1,RYR2
WP	Sudden infant death syndrome SIDS susceptibility pathways	WP:WP706	0.0212826	1.67198	159	182	12	8722	BDNF,EP300,HDAC1,JUN,MEF2C,PRKACA,PRKAR2A,PRKAR2B,ADCYAP1,CHRNA7,RYR2,TF
WP	Cardiac hypertrophic response	WP:WP2795	0.0215875	1.6658	54	182	7	8722	AKT2,MAP3K1,RAC1,TNFRSF1A,FGF2,HDAC7,PPP3CA
WP	TNF related weak inducer of apoptosis TWEAK signaling	WP:WP2036	0.0218975	1.65961	38	182	6	8722	AKT2,HDAC1,JUN,RAC1,RELB,RIPK1
WP	mBDNF and proBDNF regulation of GABA neurotransmission	WP:WP4829	0.0218975	1.65961	38	182	6	8722	BDNF,NGFR,PIK3CA,RHOA,GABRG2,SLC12A5
WP	MECP2 and associated Rett syndrome	WP:WP3584	0.023666	1.62588	73	182	8	8722	BDNF,GRIA1,HDAC1,MEF2C,SIN3A,TET1,FGF2,GAD1
WP	Head and neck squamous cell carcinoma	WP:WP4674	0.0260682	1.58389	74	182	8	8722	AKT2,CDKN1A,NFE2L2,PIK3CA,SESN1,TP53,CCND1,PRKAA2
WP	Oxidative damage response	WP:WP3941	0.0294107	1.53149	40	182	6	8722	BAG4,BCL2,CDKN1A,MAP3K1,PCNA,APAF1
WP	Small cell lung cancer	WP:WP4658	0.0304528	1.51637	96	182	9	8722	AKT2,BCL2,CDKN1A,CKS1B,PIK3CA,TP53,APAF1,CCND1,COL4A2
WP	DNA repair pathways full network	WP:WP4946	0.0330942	1.48025	119	182	10	8722	ATR,LIG1,MRE11,NTHL1,PCNA,POLE,RAD50,RAD51C,RPA1,MUTYH
WP	Common pathways underlying drug addiction	WP:WP2636	0.0338621	1.47029	41	182	6	8722	GRIA1,GRIA2,PRKACA,CAMK4,DRD2,PRKCG
WP	MET in type 1 papillary renal cell carcinoma	WP:WP4205	0.0341663	1.4664	58	182	7	8722	AKT2,CDKN1A,JUN,PAK1,PIK3CA,RAC1,HGF
WP	Hippo signaling regulation	WP:WP4540	0.0356647	1.44776	98	182	9	8722	NGFR,PRKACA,PRKAR2A,PRKAR2B,PRKCQ,RAC1,RHOA,PRKAA2,PRKCG
TF	Factor: KLF15; motif: RCCMCRCCCMCN	TF:M12160	1.47895e-10	9.83005	13060	221	193	20044	ABCC8,ADRA2A,AGO4,AKT2,APOE,ASB2,ATG3,ATG5,ATR,B3GNT5,BAG3,BDNF,BECN1,BMI1,BNIP3,BNIP3L,CABLES1,CASP2,CASP6,CD83,CDKN1A,CKS1B,CLIC4,CLSTN1,CNN2,COTL1,COX5B,CRIP1,CSK,DAB2,DLG4,DNMT3A,DOCK1,DOT1L,DUSP7,EHMT2,EIF1,EP300,EPCAM,FABP5,GRIA1,GRIA2,GRIN2B,GRM2,GRM3,HDAC1,HPRT1,HSPB1,IFNAR2,IGF2R,IRAK2,JAM2,JUN,KAT2A,KAT2B,KDM4D,KDM5C,KDM6A,KMT2C,LACC1,LAMP1,LAMP2,LGMN,LIG1,MAFB,MAFF,MAP3K1,MCM6,MDM2,MEF…
TF	Factor: MAZ; motif: GGGMGGGGSSGGGGGGGGGGGG; match class: 1	TF:M09636_1	2.05882e-10	9.68638	14493	221	204	20044	ABCC8,ADRA2A,AGO4,AKT2,APOE,ASB2,ATG3,ATG5,ATR,B3GNT5,BAG3,BAG4,BCL2,BDNF,BECN1,BMI1,BNIP3,BNIP3L,CABLES1,CASP2,CASP6,CD47,CD83,CD8A,CDKN1A,CKS1B,CLIC4,CLSTN1,CNN2,COA5,COTL1,COX5B,CRIP1,CSK,DAB2,DLG4,DNMT3A,DOCK1,DOT1L,DUSP7,EHMT2,EIF1,EP300,EPCAM,EPG5,FABP5,GRIA2,GRIN2B,GRM2,GRM3,HDAC1,HPRT1,HSPB1,IFNAR2,IGF2R,IRAK2,JAM2,JUN,KAT2A,KAT2B,KDM4D,KDM5C,KDM6A,KMT2C,LACC1,LAMP1,LAMP2,LGMN,LIG1,MAFB,M…
TF	Factor: ZNF148; motif: NNNNNNCCNNCCCCTCCCCCACCCN	TF:M09834	2.96701e-10	9.52768	7162	221	133	20044	ABCC8,AKT2,APOE,ATG3,ATR,B3GNT5,BAG3,BDNF,BMI1,BNIP3L,CABLES1,CASP6,CD83,CD8A,CLIC4,CLSTN1,CNN2,COTL1,COX5B,DAB2,DLG4,DNMT3A,DOCK1,DOT1L,DUSP7,EHMT2,EP300,EPCAM,GRIA2,GRIN2B,GRM2,HDAC1,HPRT1,IFNAR2,IGF2R,JAM2,JUN,KAT2A,KAT2B,KDM6A,KMT2C,LAMP2,LIG1,MAFB,MAFF,MAP3K1,MCM6,MDM2,MEF2C,MRE11,MSN,NCAPH,NFE2L2,NGFR,NLGN1,NPTX1,NQO1,OPTN,PAK1,PCNA,PEX14,PIK3CA,POLE,PPFIA4,PRKACA,PRKAR2B,PRKCQ,RAB6B,RAC1,R…
TF	Factor: ZBP89; motif: CCCCKCCCCCNN	TF:M07397	4.30118e-10	9.36641	7364	221	135	20044	ABCC8,AKT2,APOE,ATG3,ATR,B3GNT5,BAG3,BDNF,BECN1,BMI1,BNIP3L,CABLES1,CASP6,CD83,CLIC4,CLSTN1,CNN2,COTL1,COX5B,DAB2,DLG4,DNMT3A,DOCK1,DOT1L,DUSP7,EHMT2,EIF1,EP300,EPCAM,GRIA2,GRIN2B,GRM2,GRM3,HDAC1,HPRT1,IFNAR2,IGF2R,JUN,KAT2A,KAT2B,KDM6A,KMT2C,LAMP2,LIG1,MAFB,MAFF,MAP3K1,MCM6,MDM2,MEF2C,MRE11,MSN,MYORG,NCAPH,NFE2L2,NGFR,NLGN1,NPTX1,NQO1,PAK1,PCNA,PEX14,PIK3CA,POLE,PPFIA4,PRKACA,PRKAR2B,PRKCQ,RAB6B…
TF	Factor: BTEB3; motif: CCNNSCCNSCCCCKCCCCC	TF:M09826	2.26427e-09	8.64507	11837	221	180	20044	ABCC8,ADRA2A,AGO4,AKT2,APOE,ATG3,ATG5,ATR,B3GNT5,BAG3,BAG4,BCL2,BDNF,BECN1,BMI1,BNIP3,BNIP3L,CABLES1,CASP2,CASP6,CD47,CD83,CD8A,CKS1B,CLIC4,CLSTN1,CNN2,COTL1,COX5B,CRIP1,CSK,DAB2,DLG4,DNMT3A,DOCK1,DOT1L,DUSP7,EHMT2,EP300,EPCAM,FABP5,GRIA2,GRIN2B,GRM2,HDAC1,HPRT1,HSPB1,IFNAR2,IGF2R,IRAK2,JUN,KAT2A,KAT2B,KDM4D,KDM6A,KMT2C,LAMP1,LAMP2,LIG1,MAFB,MAFF,MAP3K1,MCM6,MDM2,MEF2C,MRE11,MSN,MYORG,NCAPH,NFE2L…
TF	Factor: SP1; motif: CCCCKCCCCC	TF:M02281	2.53717e-09	8.59565	6671	221	125	20044	ABCC8,AKT2,APOE,ATG3,ATR,B3GNT5,BAG3,BDNF,BECN1,BMI1,BNIP3L,CABLES1,CASP6,CD83,CLIC4,CLSTN1,CNN2,COTL1,COX5B,DAB2,DLG4,DNMT3A,DOT1L,DUSP7,EHMT2,EP300,EPCAM,GRIA2,GRIN2B,GRM2,HDAC1,HPRT1,IFNAR2,IGF2R,JUN,KAT2A,KAT2B,KDM4D,KDM6A,KMT2C,LAMP2,LIG1,MAFB,MAFF,MAP3K1,MCM6,MEF2C,MRE11,MYORG,NCAPH,NFE2L2,NGFR,NPTX1,NQO1,PAK1,PCNA,PEX14,PIK3CA,POLE,PPFIA4,PRKACA,PRKAR2B,PRKCQ,RAC1,RAD50,RAD51C,RAD9A,RALB,R…
TF	Factor: GKLF; motif: NNNRGGNGNGGSN; match class: 1	TF:M07289_1	5.74636e-09	8.24061	10876	221	170	20044	ABCC8,ADRA2A,AKT2,APOE,ATG3,B3GNT5,BAG3,BAG4,BCL2,BDNF,BECN1,BMI1,BNIP3,CABLES1,CASP2,CD83,CD8A,CDKN1A,CKS1B,CLIC4,CLSTN1,CNN2,COTL1,CSK,DAB2,DLG4,DNMT3A,DOT1L,DUSP7,EHMT2,EIF1,EP300,EPCAM,EPG5,GRIA1,GRIA2,GRIN2B,GRM2,GRM3,HDAC1,HPRT1,IFNAR2,IGF2R,JAM2,JUN,KAT2A,KAT2B,KDM4D,KDM5C,KDM6A,KMT2C,LACC1,LAMP2,LIG1,MAFB,MAFF,MAP3K1,MDM2,MEF2C,MRE11,MSN,MYORG,NCAPH,NFE2L2,NGFR,NLGN1,NPTX1,NRP2,OPTN,PAK1,…
TF	Factor: MAZ; motif: GGGGGAGGGGGNGRGRRRGNRG	TF:M09984	1.03417e-08	7.98541	9841	221	159	20044	ABCC8,ADRA2A,AGO4,AKT2,APOE,ASB2,B3GNT5,BAG3,BAG4,BCL2,BDNF,BMI1,BNIP3,BNIP3L,CABLES1,CASP2,CASP6,CD47,CD83,CLSTN1,CNN2,COTL1,COX5B,CRIP1,CSK,DAB2,DLG4,DNMT3A,DOCK1,DOT1L,DUSP7,EHMT2,EIF1,EPCAM,GRIA1,GRIA2,GRIN2B,GRM2,GRM3,HDAC1,HPRT1,IFNAR2,IGF2R,IRAK2,JAM2,JUN,KAT2A,KAT2B,KDM6A,KMT2C,LAMP2,LIG1,MAFB,MAFF,MAP3K1,MDM2,MEF2C,MRE11,MSN,MYORG,NCAPH,NFE2L2,NGFR,NLGN1,NPTX1,NQO1,NTHL1,OPTN,PAK1,PCNA,P…
TF	Factor: Sp1; motif: GGNDGGRGGCGGGG	TF:M04953	1.42026e-08	7.84763	8927	221	149	20044	ABCC8,ADRA2A,AKT2,APOE,ATG3,ATR,B3GNT5,BAG3,BCL2,BDNF,BECN1,BMI1,BNIP3L,CABLES1,CASP6,CD83,CKS1B,CLIC4,CLSTN1,COTL1,COX5B,CRIP1,DAB2,DLG4,DNMT3A,DOT1L,DUSP7,EHMT2,EIF1,EP300,EPCAM,GRIA1,GRIA2,GRIN2B,GRM2,GRM3,HDAC1,HPRT1,HSPB1,IFNAR2,IGF2R,JAM2,JUN,KAT2A,KAT2B,KDM6A,KMT2C,LAMP2,LIG1,MAFB,MAFF,MAP3K1,MCM6,MDM2,MEF2C,MRE11,MSN,MYORG,NCAPH,NFE2L2,NGFR,NLGN1,NPTX1,NQO1,PAK1,PCNA,PIK3CA,POLE,PPFIA4,PR…
TF	Factor: ETF; motif: CCCCGCCCCYN; match class: 1	TF:M07039_1	1.67557e-08	7.77584	13994	221	197	20044	ABCC8,ADRA2A,AGO4,AKT2,APOE,ATF3,ATG3,ATG5,ATR,B3GNT5,BAG3,BAG4,BCL2,BDNF,BECN1,BMI1,BNIP3,BNIP3L,CABLES1,CASP2,CASP6,CD47,CD83,CD8A,CDKN1A,CKS1B,CLIC4,CLSTN1,CNN2,COTL1,COX5B,CRIP1,CSK,DAB2,DLG4,DNMT3A,DOCK1,DOT1L,DUSP7,EHMT2,EIF1,EP300,EPCAM,EPG5,FABP5,GRIA1,GRIN2B,GRM2,GRM3,HDAC1,HPRT1,HSPB1,IFNAR2,IGF2R,IRAK2,JAM2,JUN,KAT2A,KAT2B,KDM4D,KDM5C,KDM6A,KMT2C,LACC1,LAMP2,LGMN,LIG1,MAFB,MAFF,MAP3K1,…
TF	Factor: ETF; motif: GVGGMGG	TF:M00695	3.2798e-08	7.48415	10744	221	167	20044	ABCC8,ADRA2A,AGO4,AKT2,ATG5,B3GNT5,BAG3,BAG4,BCL2,BDNF,BECN1,BMI1,BNIP3,BNIP3L,CABLES1,CASP2,CD47,CD83,CDKN1A,CLIC4,CLSTN1,CNN2,COA5,COTL1,CRIP1,CYP7B1,DAB2,DLG4,DNMT3A,DOCK1,DOT1L,DUSP7,EHMT2,EIF1,EP300,EPCAM,GRIN2B,GRM2,GRM3,GRN,HDAC1,HSPB1,IFNAR2,IGF2R,IRAK2,JUN,KAT2B,KDM5C,KDM6A,KMT2C,LACC1,LAMP1,LAMP2,LGMN,LIG1,MAFB,MAFF,MAP3K1,MCM6,MDM2,MYORG,NCAPH,NFE2L2,NLGN1,NPTX1,NRP2,NTHL1,OPTN,PAK1,PE…
TF	Factor: E2F-2; motif: GCGCGCGCNCS; match class: 1	TF:M11529_1	6.42988e-08	7.1918	14893	221	203	20044	ABCC8,ADRA2A,AGO4,AKT2,APOE,ATG3,ATG5,ATR,B3GNT5,BAG3,BAG4,BCL2,BDNF,BMI1,BNIP3,BNIP3L,CABLES1,CASP2,CASP6,CD47,CD83,CD8A,CDKN1A,CKS1B,CLIC4,CLSTN1,CNN2,COA5,COTL1,COX5B,CRIP1,CSK,CYP7B1,DAB2,DLG4,DNMT3A,DOCK1,DOT1L,DUSP7,EHMT2,EIF1,EP300,EPCAM,EPG5,FABP5,GRIA1,GRIA2,GRIN2B,GRM2,GRM3,GRN,HDAC1,HPRT1,HSPB1,IFNAR2,IGF2R,IRAK2,JAM2,JUN,KAT2A,KAT2B,KDM4D,KDM5C,KDM6A,KMT2C,LACC1,LAMP1,LAMP2,LGMN,LIG1,…
TF	Factor: Kaiso; motif: GCMGGGRGCRGS; match class: 1	TF:M03876_1	7.476e-08	7.12633	9369	221	152	20044	ADRA2A,AGO4,AKT2,APOE,ATG3,ATG5,B3GNT5,BAG3,BAG4,BCL2,BMI1,BNIP3,BNIP3L,CABLES1,CASP6,CD47,CD83,CD8A,CLIC4,CLSTN1,CNN2,COTL1,COX5B,CRIP1,CYP7B1,DAB2,DNMT3A,DOCK1,DUSP7,EHMT2,EP300,EPCAM,FABP5,GRIN2B,GRM2,GRM3,HDAC1,HPRT1,HSPB1,IFNAR2,IGF2R,IRAK2,JAM2,JUN,KAT2A,KAT2B,KDM6A,KMT2C,LAMP1,LIG1,MAFB,MAFF,MAP3K1,MCM6,MDM2,MSN,MYORG,NGFR,NPTX1,NRP2,NTHL1,OPTN,PAK1,PIK3CA,PLXDC2,POLE,PPFIA4,PRKACA,PRKAR2B…
TF	Factor: TIEG1; motif: NCCCNSNCCCCGCCCCC; match class: 1	TF:M12351_1	1.00486e-07	6.9979	8478	221	142	20044	ABCC8,ADRA2A,AGO4,AKT2,APOE,B3GNT5,BAG3,BCL2,BDNF,BMI1,BNIP3,BNIP3L,CABLES1,CASP6,CD47,CD83,CKS1B,CLIC4,CLSTN1,CNN2,COTL1,CRIP1,DAB2,DLG4,DNMT3A,DOT1L,DUSP7,EHMT2,EP300,EPCAM,FABP5,GRIN2B,GRM2,HDAC1,HPRT1,HSPB1,IFNAR2,IGF2R,JAM2,KAT2A,KAT2B,KDM4D,KDM6A,KMT2C,LIG1,MAFB,MAFF,MAP3K1,MCM6,MDM2,MRE11,MSN,MYORG,NFE2L2,NGFR,NLGN1,NPTX1,NTHL1,OPTN,PAK1,PCNA,PEX14,PIK3CA,POLE,PPFIA4,PRKACA,PRKAR2B,PTMS,RA…
TF	Factor: TIEG1; motif: NCCCNSNCCCCGCCCCC	TF:M12351	1.52918e-07	6.81554	12696	221	184	20044	ABCC8,ADRA2A,AGO4,AKT2,APOE,ATG3,ATR,B3GNT5,BAG3,BCL2,BDNF,BECN1,BMI1,BNIP3,BNIP3L,CABLES1,CASP2,CASP6,CD47,CD83,CD8A,CDKN1A,CKS1B,CLIC4,CLSTN1,CNN2,COTL1,COX5B,CRIP1,CSK,DAB2,DLG4,DNMT3A,DOCK1,DOT1L,DUSP7,EHMT2,EIF1,EP300,EPCAM,EPG5,FABP5,GRIA1,GRIA2,GRIN2B,GRM2,GRM3,HDAC1,HPRT1,HSPB1,IFNAR2,IGF2R,IRAK2,JAM2,JUN,KAT2A,KAT2B,KDM4D,KDM6A,KMT2C,LACC1,LAMP1,LAMP2,LIG1,MAFB,MAFF,MAP3K1,MCM6,MDM2,MEF2…
TF	Factor: KLF14; motif: NRCCACRCCCMCN	TF:M12183	1.92251e-07	6.71613	7057	221	125	20044	ABCC8,ADRA2A,AGO4,AKT2,APOE,ATG3,ATR,B3GNT5,BAG3,BMI1,BNIP3,BNIP3L,CABLES1,CASP2,CASP6,CD83,CDKN1A,CKS1B,CLIC4,CLSTN1,CNN2,COTL1,COX5B,CRIP1,DAB2,DNMT3A,DUSP7,EHMT2,EP300,GRIN2B,GRM2,GRM3,HDAC1,HPRT1,HSPB1,IFNAR2,IGF2R,IRAK2,JAM2,JUN,KAT2A,KAT2B,KDM6A,KMT2C,LACC1,LAMP2,LGMN,LIG1,MAFB,MAFF,MAP3K1,MCM6,MRE11,MYORG,NFE2L2,NPTX1,PAK1,PCNA,PIK3CA,POLE,PPFIA4,PRKACA,PRKAR2A,PRKAR2B,PTMS,RAC1,RAD50,RAD9…
TF	Factor: GKLF; motif: NNNRGGNGNGGSN	TF:M07289	2.35086e-07	6.62877	15020	221	203	20044	ABCC8,ADRA2A,AKT2,APOE,ATF3,ATG3,ATG5,B3GNT5,BAG3,BAG4,BCL2,BDNF,BECN1,BMI1,BNIP3,BNIP3L,CABLES1,CASP2,CASP6,CD47,CD83,CD8A,CDKN1A,CKS1B,CLIC4,CLSTN1,CNN2,COTL1,COX5B,CRIP1,CSK,CYP7B1,DAB2,DLG4,DNMT3A,DOCK1,DOT1L,DUSP7,EHMT2,EIF1,EP300,EPCAM,EPG5,FABP5,GRIA1,GRIA2,GRIN2B,GRM2,GRM3,GRN,GSN,HDAC1,HPRT1,HSPB1,IFNAR2,IGF2R,JAM2,JUN,KAT2A,KAT2B,KDM4D,KDM5C,KDM6A,KMT2C,LACC1,LAMP1,LAMP2,LGMN,LIG1,MAFB,…
TF	Factor: ZNF253; motif: SNGNSCGNGGNGCKGNN	TF:M13147	2.4556e-07	6.60984	11358	221	171	20044	ABCC8,ADRA2A,AGO4,AKT2,APOE,ATF3,ATG3,ATG5,B3GNT5,BAG3,BAG4,BCL2,BDNF,BMI1,BNIP3,BNIP3L,CASP2,CASP6,CD47,CD8A,CDKN1A,CKS1B,CLIC4,CLSTN1,COA5,COTL1,COX5B,CRIP1,DAB2,DLG4,DNMT3A,DOCK1,DOT1L,DUSP7,EHMT2,EIF1,EP300,FABP5,GRIA2,GRIN2B,GRM2,GRM3,HPRT1,HSPB1,IFNAR2,IGF2R,JAM2,JUN,KAT2A,KAT2B,KDM4D,KDM5C,KDM6A,KMT2C,LACC1,LAMP1,LGMN,LIG1,MAFB,MAFF,MAP3K1,MCM6,MDM2,MSN,MYORG,NCAPH,NFE2L2,NGFR,NLGN1,NPTX1,…
TF	Factor: E2F-3; motif: GGCGGGN; match class: 1	TF:M02089_1	2.53114e-07	6.59668	9682	221	154	20044	ABCC8,ADRA2A,AGO4,AKT2,ATG3,ATR,B3GNT5,BAG3,BAG4,BCL2,BMI1,BNIP3,BNIP3L,CABLES1,CASP2,CASP6,CD47,CD83,CDKN1A,CLIC4,CLSTN1,CNN2,COTL1,COX5B,CRIP1,DAB2,DLG4,DNMT3A,DOCK1,DOT1L,DUSP7,EHMT2,EIF1,EP300,EPCAM,FABP5,GRM2,HDAC1,HPRT1,HSPB1,IFNAR2,IGF2R,IRAK2,KAT2A,KAT2B,KDM6A,KMT2C,LACC1,LAMP1,LAMP2,LIG1,MAFB,MAFF,MAP3K1,MCM6,MRE11,MSN,MYORG,NFE2L2,NGFR,NLGN1,NPTX1,NTHL1,OPTN,PAK1,PCNA,PIK3CA,PLXDC2,POLE…
TF	Factor: Sp1; motif: CCCCGCCCCN	TF:M00933	3.57755e-07	6.44641	10005	221	157	20044	ABCC8,ADRA2A,AKT2,APOE,ATG3,ATR,B3GNT5,BAG3,BDNF,BMI1,BNIP3,BNIP3L,CABLES1,CASP2,CASP6,CD47,CD83,CDKN1A,CLIC4,CLSTN1,CNN2,COTL1,COX5B,CRIP1,CSK,DAB2,DLG4,DNMT3A,DOT1L,DUSP7,EHMT2,EP300,EPCAM,FABP5,GRIA2,GRIN2B,GRM2,HDAC1,HPRT1,HSPB1,IFNAR2,IGF2R,IRAK2,JUN,KAT2A,KAT2B,KDM4D,KDM6A,KMT2C,LACC1,LAMP1,LAMP2,LIG1,MAFB,MAFF,MAP3K1,MCM6,MEF2C,MRE11,MSN,MYORG,NCAPH,NFE2L2,NGFR,NPTX1,NQO1,NTHL1,OPTN,PAK1,P…
TF	Factor: BTEB3; motif: CCNNSCCNSCCCCKCCCCC; match class: 1	TF:M09826_1	6.02568e-07	6.21999	7769	221	132	20044	ABCC8,ADRA2A,AGO4,AKT2,APOE,B3GNT5,BAG3,BAG4,BCL2,BDNF,BMI1,BNIP3,BNIP3L,CABLES1,CASP2,CASP6,CD47,CD83,CLIC4,CLSTN1,CNN2,CRIP1,DAB2,DLG4,DNMT3A,DOT1L,DUSP7,EHMT2,EP300,EPCAM,FABP5,GRIN2B,GRM2,HDAC1,HPRT1,HSPB1,IFNAR2,IGF2R,KAT2A,KAT2B,KDM6A,KMT2C,LAMP2,LIG1,MAFB,MAFF,MAP3K1,MRE11,MSN,MYORG,NFE2L2,NGFR,NLGN1,NPTX1,NTHL1,OPTN,PAK1,PCNA,PEX14,PIK3CA,PLXDC2,POLE,PPFIA4,PRKACA,PRKAR2B,PTMS,RAB6B,RAC1,…
TF	Factor: ETF; motif: CCCCGCCCCYN	TF:M07039	1.14705e-06	5.94042	16764	221	214	20044	ABCC8,ADRA2A,AGO4,AKT2,APOE,ASB2,ATF3,ATG3,ATG5,ATR,B3GNT5,BAG3,BAG4,BCL2,BDNF,BECN1,BMI1,BNIP3,BNIP3L,CABLES1,CASP2,CASP6,CD47,CD83,CD8A,CDKN1A,CKS1B,CLIC4,CLSTN1,CNN2,COTL1,COX5B,CRIP1,CSK,CYP7B1,DAB2,DLG4,DNMT3A,DOCK1,DOT1L,DUSP7,EHMT2,EIF1,EP300,EPCAM,EPG5,FABP5,GRIA1,GRIA2,GRIN2B,GRM2,GRM3,GRN,HDAC1,HPRT1,HSPB1,IFNAR2,IGF2R,IRAK2,JAM2,JUN,KAT2A,KAT2B,KDM4D,KDM5C,KDM6A,KMT2C,LACC1,LAMP1,LAMP2…
TF	Factor: Sp1; motif: NGGGGCGGGGN; match class: 1	TF:M07395_1	1.4486e-06	5.83905	6581	221	117	20044	ABCC8,ADRA2A,AKT2,APOE,B3GNT5,BAG3,BAG4,BMI1,BNIP3,BNIP3L,CABLES1,CASP6,CD47,CD83,CDKN1A,CLIC4,CLSTN1,COTL1,COX5B,CRIP1,DAB2,DNMT3A,DOCK1,DOT1L,DUSP7,EHMT2,EP300,FABP5,GRM2,HDAC1,HPRT1,HSPB1,IFNAR2,IGF2R,IRAK2,KAT2A,KAT2B,KDM4D,KDM6A,KMT2C,LAMP2,LIG1,MAFB,MAFF,MAP3K1,MCM6,MRE11,MSN,MYORG,NGFR,NPTX1,NRP2,NTHL1,OPTN,PAK1,PCNA,POLE,PPFIA4,PRKACA,PRKAR2A,PRKAR2B,PTMS,RAC1,RALB,RELB,RELN,RHOA,RIPK1,RP…
TF	Factor: E2F-4; motif: GCGGGAAANA	TF:M02090	1.4635e-06	5.83461	12283	221	178	20044	ABCC8,ADRA2A,AGO4,AKT2,APOE,ASB2,ATG3,B3GNT5,BAG3,BCL2,BDNF,BMI1,BNIP3,BNIP3L,CABLES1,CASP2,CD47,CD83,CD8A,CKS1B,CLIC4,CLSTN1,COTL1,CRIP1,DAB2,DLG4,DNMT3A,DOCK1,DOT1L,DUSP7,EHMT2,EIF1,EP300,EPCAM,FABP5,GRIA1,GRIA2,GRIN2B,GRM2,GRM3,GRN,GSN,HDAC1,HPRT1,IFNAR2,IGF2R,IRAK2,JAM2,JUN,KAT2A,KAT2B,KDM4D,KDM5C,KDM6A,KMT2C,LACC1,LAMP1,LAMP2,LGMN,LIG1,MAFB,MAFF,MAP3K1,MCM6,MDM2,MRE11,MYORG,NCAPH,NFE2L2,NGFR…
TF	Factor: MAZ; motif: GGGMGGGGSSGGGGGGGGGGGG	TF:M09636	1.60746e-06	5.79386	16635	221	213	20044	ABCC8,ADRA2A,AGO4,AKT2,APOE,ASB2,ATG3,ATG5,ATR,B3GNT5,BAG3,BAG4,BCL2,BDNF,BECN1,BMI1,BNIP3,BNIP3L,CABLES1,CASP2,CASP6,CD47,CD83,CD8A,CDKN1A,CKS1B,CLIC4,CLSTN1,CNN2,COA5,COTL1,COX5B,CRIP1,CSK,CYP7B1,DAB2,DLG4,DNMT3A,DOCK1,DOT1L,DUSP7,EHMT2,EIF1,EP300,EPCAM,EPG5,FABP5,GRIA1,GRIA2,GRIN2B,GRM2,GRM3,HDAC1,HPRT1,HSPB1,IFNAR2,IGF2R,IRAK2,JAM2,JUN,KAT2A,KAT2B,KDM4D,KDM5C,KDM6A,KMT2C,LACC1,LAMP1,LAMP2,LGM…
TF	Factor: BTEB1; motif: GGGGGCGGGGCNGSGGGNGS; match class: 1	TF:M09723_1	1.82569e-06	5.73857	6193	221	112	20044	ABCC8,ADRA2A,AKT2,APOE,B3GNT5,BAG3,BDNF,BMI1,BNIP3,BNIP3L,CABLES1,CASP2,CASP6,CD47,CD83,CLIC4,CLSTN1,CNN2,CRIP1,DLG4,DNMT3A,DOCK1,DOT1L,DUSP7,EHMT2,EP300,FABP5,GRM2,HDAC1,HPRT1,IFNAR2,IGF2R,KAT2A,KAT2B,KDM6A,KMT2C,LACC1,LAMP1,LAMP2,LIG1,MAFF,MAP3K1,MCM6,MRE11,MSN,MYORG,NGFR,NLGN1,NPTX1,OPTN,PAK1,PCNA,PEX14,POLE,PPFIA4,PRKACA,PRKAR2B,PTMS,RAB6B,RALB,RELB,RELN,RHOA,RPA1,SESN1,SIN3A,SOD2,STMN1,SUV39…
TF	Factor: Sp1; motif: GGGGCGGGGC; match class: 1	TF:M00931_1	2.01111e-06	5.69656	6121	221	111	20044	ABCC8,ADRA2A,AKT2,ATR,B3GNT5,BAG3,BMI1,BNIP3,BNIP3L,CABLES1,CASP2,CASP6,CD47,CD83,CDKN1A,CLIC4,CLSTN1,CRIP1,DAB2,DNMT3A,DOT1L,DUSP7,EHMT2,EP300,FABP5,GRM2,HDAC1,HPRT1,HSPB1,IFNAR2,IGF2R,KAT2A,KAT2B,KDM6A,KMT2C,LAMP2,LIG1,MAFB,MAFF,MAP3K1,MCM6,MRE11,MSN,MYORG,NFE2L2,NGFR,NPTX1,NTHL1,OPTN,PAK1,PCNA,POLE,PRKACA,PRKAR2A,PRKAR2B,PTMS,RAC1,RAD50,RALB,RELB,RELN,RHOA,RIPK1,SESN1,SIN3A,SMC1A,SOD2,SOX9,ST3…
TF	Factor: CPBP; motif: GNNRGGGHGGGGNNGGGRN	TF:M09973	2.13011e-06	5.6716	11183	221	167	20044	ABCC8,ADRA2A,AKT2,APOE,ASB2,ATG3,ATG5,ATR,B3GNT5,BAG3,BAG4,BDNF,BMI1,BNIP3,BNIP3L,CABLES1,CASP2,CASP6,CD47,CD83,CD8A,CDKN1A,CKS1B,CLIC4,CLSTN1,CNN2,COTL1,CRIP1,DAB2,DLG4,DNMT3A,DOT1L,DUSP7,EHMT2,EIF1,EP300,EPCAM,EPG5,FABP5,GRIA2,GRIN2B,GRM2,GRM3,HDAC1,HPRT1,HSPB1,IFNAR2,IGF2R,IRAK2,JAM2,JUN,KAT2A,KAT2B,KDM4D,KDM6A,KMT2C,LIG1,MAFF,MAP3K1,MEF2C,MRE11,MSN,MYORG,NCAPH,NFE2L2,NGFR,NLGN1,NPTX1,NTHL1,OP…
TF	Factor: SP1; motif: NCCCCKCCCCC	TF:M07226	2.31889e-06	5.63472	8528	221	139	20044	ABCC8,ADRA2A,AKT2,APOE,ATG3,ATR,B3GNT5,BAG3,BDNF,BMI1,BNIP3,BNIP3L,CABLES1,CASP2,CASP6,CD47,CD83,CDKN1A,CLIC4,CLSTN1,CNN2,COTL1,COX5B,CRIP1,DAB2,DLG4,DNMT3A,DOT1L,DUSP7,EHMT2,EP300,EPCAM,GRIA2,GRIN2B,GRM2,HDAC1,HPRT1,IFNAR2,IGF2R,JUN,KAT2A,KAT2B,KDM4D,KDM6A,KMT2C,LAMP2,LIG1,MAFB,MAFF,MAP3K1,MCM6,MEF2C,MRE11,MSN,MYORG,NCAPH,NFE2L2,NGFR,NPTX1,NQO1,OPTN,PAK1,PCNA,PEX14,PIK3CA,PLXDC2,POLE,PPFIA4,PRKA…
TF	Factor: Sp1; motif: NGGGGGCGGGGYN; match class: 1	TF:M00196_1	2.37939e-06	5.62353	6137	221	111	20044	ABCC8,ADRA2A,AKT2,APOE,B3GNT5,BAG3,BAG4,BMI1,BNIP3,BNIP3L,CABLES1,CASP6,CD47,CD83,CDKN1A,CLSTN1,COTL1,COX5B,CRIP1,DAB2,DOT1L,DUSP7,EHMT2,EP300,FABP5,GRM2,HDAC1,HPRT1,HSPB1,IFNAR2,IGF2R,KAT2A,KAT2B,KDM6A,KMT2C,LAMP2,LIG1,MAFB,MAFF,MAP3K1,MCM6,MRE11,MSN,MYORG,NGFR,NPTX1,NRP2,NTHL1,OPTN,PAK1,PCNA,POLE,PPFIA4,PRKACA,PRKAR2A,PRKAR2B,RAC1,RAD9A,RALB,RELB,RELN,RHOA,RIPK1,RPA1,SESN1,SIN3A,SMC1A,SOD2,SOX9…
TF	Factor: E2F4; motif: YCCCGCCNCNNSSNNSNN; match class: 1	TF:M12599_1	2.4676e-06	5.60773	16076	221	209	20044	ABCC8,ADRA2A,AGO4,AKT2,APOE,ATG3,ATG5,ATR,B3GNT5,BAG3,BAG4,BCL2,BDNF,BECN1,BMI1,BNIP3,BNIP3L,CABLES1,CASP2,CASP6,CD47,CD83,CD8A,CDKN1A,CKS1B,CLIC4,CLSTN1,CNN2,COA5,COTL1,COX5B,CRIP1,CSK,CYP7B1,DAB2,DLG4,DNMT3A,DOCK1,DOT1L,DUSP7,EHMT2,EIF1,EP300,EPCAM,EPG5,FABP5,GRIA1,GRIA2,GRIN2B,GRM2,GRM3,GRN,HDAC1,HPRT1,HSPB1,IFNAR2,IGF2R,IRAK2,JAM2,JUN,KAT2A,KAT2B,KDM4D,KDM5C,KDM6A,KMT2C,LACC1,LAMP1,LAMP2,LGMN…
TF	Factor: BTEB1; motif: GGGGGCGGGGCNGSGGGNGS	TF:M09723	2.63141e-06	5.57981	10316	221	158	20044	ABCC8,ADRA2A,AKT2,APOE,ASB2,ATG3,ATR,B3GNT5,BAG3,BDNF,BMI1,BNIP3,BNIP3L,CABLES1,CASP2,CASP6,CD47,CD83,CKS1B,CLIC4,CLSTN1,CNN2,COTL1,CRIP1,CSK,DAB2,DLG4,DNMT3A,DOCK1,DOT1L,DUSP7,EHMT2,EP300,EPCAM,FABP5,GRIA2,GRIN2B,GRM2,HDAC1,HPRT1,HSPB1,IFNAR2,IGF2R,IRAK2,KAT2A,KAT2B,KDM4D,KDM6A,KMT2C,LACC1,LAMP1,LAMP2,LIG1,MAFB,MAFF,MAP3K1,MCM6,MRE11,MSN,MYORG,NCAPH,NFE2L2,NGFR,NLGN1,NPTX1,NQO1,OPTN,PAK1,PCNA,PE…
TF	Factor: E2F-2; motif: GCGCGCGCGYW; match class: 1	TF:M11531_1	3.69508e-06	5.43238	12708	221	181	20044	ABCC8,ADRA2A,AGO4,AKT2,APOE,ATG3,ATG5,B3GNT5,BAG3,BAG4,BCL2,BDNF,BECN1,BMI1,BNIP3,BNIP3L,CABLES1,CASP2,CASP6,CD47,CD83,CD8A,CDKN1A,CKS1B,CLIC4,CLSTN1,CNN2,COA5,COTL1,COX5B,CRIP1,CYP7B1,DLG4,DNMT3A,DOCK1,DOT1L,DUSP7,EHMT2,EIF1,EP300,EPCAM,EPG5,FABP5,GRIA2,GRIN2B,GRM2,GRM3,GRN,HPRT1,HSPB1,IFNAR2,IGF2R,IRAK2,JAM2,JUN,KAT2A,KAT2B,KDM4D,KDM6A,KMT2C,LACC1,LAMP1,LGMN,LIG1,MAFB,MAFF,MAP3K1,MCM6,MDM2,MSN,…
TF	Factor: Miz-1; motif: NNRGGWGGGGGAGGGGMRR	TF:M10112	3.81319e-06	5.41871	8762	221	141	20044	ABCC8,ADRA2A,AKT2,APOE,ATG3,B3GNT5,BAG3,BDNF,BMI1,BNIP3L,CABLES1,CASP2,CASP6,CD83,CD8A,CLSTN1,CNN2,COA5,COTL1,CRIP1,CSK,DLG4,DNMT3A,DOT1L,EHMT2,EIF1,EP300,EPCAM,EPG5,GRIA2,GRIN2B,GRM2,GRM3,HDAC1,IFNAR2,IGF2R,JAM2,JUN,KAT2A,KAT2B,KDM6A,KMT2C,LAMP2,LGMN,LIG1,MAP3K1,MCM6,MDM2,MEF2C,MRE11,MSN,NCAPH,NFE2L2,NGFR,NLGN1,NPTX1,NQO1,OPTN,PAK1,PEX14,POLE,PPFIA4,PRKACA,PRKAR2B,PRKCQ,PROS1,RAB6B,RAB7A,RAC1,RA…
TF	Factor: sp4; motif: NNGNARGRGGCGGRGCNNRR; match class: 1	TF:M10072_1	5.28282e-06	5.27713	6460	221	114	20044	ABCC8,AGO4,APOE,B3GNT5,BAG3,BCL2,BDNF,BMI1,BNIP3,BNIP3L,CABLES1,CASP2,CASP6,CD83,CLIC4,CLSTN1,COTL1,CRIP1,DNMT3A,DOT1L,DUSP7,EHMT2,EP300,EPCAM,FABP5,GRM2,HDAC1,HPRT1,HSPB1,IFNAR2,IGF2R,KAT2A,KAT2B,KDM4D,KDM6A,KMT2C,LACC1,LAMP2,LIG1,MAFB,MAFF,MAP3K1,MCM6,MRE11,MSN,MYORG,NFE2L2,NGFR,NPTX1,OPTN,PAK1,PCNA,PIK3CA,PLXDC2,POLE,PPFIA4,PRKACA,PRKAR2B,PTMS,RAB6B,RAD9A,RELB,RELN,RHOA,SESN1,SIN3A,SLC44A1,SMC…
TF	Factor: TCF-1; motif: ACATCGRGRCGCTGW; match class: 1	TF:M11601_1	6.21902e-06	5.20628	11404	221	168	20044	ABCC8,ADRA2A,AGO4,AKT2,ATG3,ATG5,B3GNT5,BAG3,BAG4,BCL2,BECN1,BMI1,BNIP3,BNIP3L,CASP2,CASP6,CD47,CD83,CD8A,CDKN1A,CKS1B,CLIC4,CLSTN1,CNN2,COA5,COTL1,COX5B,CRIP1,CSK,DNMT3A,DOCK1,DOT1L,DUSP7,EIF1,EP300,EPCAM,EPG5,FABP5,GRIA2,GRM2,GRN,HPRT1,HSPB1,IFNAR2,IGF2R,IRAK2,JAM2,KAT2A,KAT2B,KDM5C,KDM6A,KMT2C,LAMP1,LGMN,LIG1,MAFB,MAFF,MAP3K1,MCM6,MDM2,MYORG,NCAPH,NFE2L2,NGFR,NLGN1,NPTX1,NRP2,NTHL1,OPTN,PAK1,P…
TF	Factor: CTCF; motif: NCCRSTAGGGGGCGC	TF:M08911	7.12567e-06	5.14717	9382	221	147	20044	ABCC8,ADRA2A,AGO4,AKT2,ATR,B3GNT5,BAG3,BCL2,BDNF,BMI1,BNIP3,CABLES1,CASP6,CD83,CD8A,CDKN1A,CKS1B,CLIC4,CLSTN1,CNN2,COA5,COTL1,COX5B,CRIP1,DAB2,DLG4,DNMT3A,DOCK1,DOT1L,DUSP7,EIF1,EP300,EPCAM,FABP5,GRIA2,GRIN2B,GRM2,GRM3,GRN,HDAC1,HPRT1,IFNAR2,JAM2,JUN,KAT2B,KDM5C,KDM6A,KMT2C,LACC1,LAMP1,LIG1,MAFB,MAFF,MAP3K1,MDM2,MYORG,NFE2L2,NGFR,NLGN1,NPTX1,NTHL1,OPTN,PAK1,PCNA,PEX14,PILRB,PLXDC2,POLE,PPFIA4,PRK…
TF	Factor: E2F-1:HES-7; motif: GGCRCGTGSYNNWNGGCGCSM; match class: 1	TF:M08525_1	9.6598e-06	5.01503	15662	221	205	20044	ABCC8,ADRA2A,AGO4,AKT2,APOE,ATG3,ATG5,B3GNT5,BAG3,BAG4,BCL2,BDNF,BECN1,BMI1,BNIP3,BNIP3L,CABLES1,CASP2,CASP6,CD47,CD83,CD8A,CDKN1A,CKS1B,CLIC4,CLSTN1,CNN2,COA5,COTL1,COX5B,CRIP1,CSK,CYP7B1,DAB2,DLG4,DNMT3A,DOCK1,DOT1L,DUSP7,EHMT2,EIF1,EP300,EPCAM,EPG5,FABP5,GRIA1,GRIA2,GRIN2B,GRM2,GRN,HDAC1,HPRT1,HSPB1,IFNAR2,IGF2R,IRAK2,JAM2,JUN,KAT2A,KAT2B,KDM4D,KDM5C,KDM6A,KMT2C,LACC1,LAMP1,LAMP2,LGMN,LIG1,MAF…
TF	Factor: E2F1; motif: GSGCGGGAAN	TF:M12597	9.84722e-06	5.00669	14407	221	195	20044	ABCC8,ADRA2A,AGO4,AKT2,APOE,ATG3,ATG5,ATR,B3GNT5,BAG3,BAG4,BCL2,BDNF,BECN1,BMI1,BNIP3,BNIP3L,CABLES1,CASP2,CD47,CD83,CDKN1A,CKS1B,CLIC4,CLSTN1,CNN2,COA5,COTL1,COX5B,CRIP1,CYP7B1,DNMT3A,DOCK1,DOT1L,DUSP7,EHMT2,EIF1,EP300,EPCAM,EPG5,FABP5,GRIA2,GRIN2B,GRM2,GRM3,GRN,GSN,HDAC1,HPRT1,HSPB1,IFNAR2,IGF2R,IRAK2,JAM2,JUN,KAT2A,KAT2B,KDM4D,KDM5C,KDM6A,KMT2C,LACC1,LAMP1,LAMP2,LGMN,LIG1,MAFB,MAFF,MAP3K1,MCM6…
TF	Factor: ZF5; motif: GGSGCGCGS; match class: 1	TF:M10438_1	1.05129e-05	4.97828	15279	221	202	20044	ABCC8,ADRA2A,AGO4,AKT2,APOE,ATG3,ATG5,ATR,B3GNT5,BAG3,BAG4,BCL2,BDNF,BECN1,BMI1,BNIP3,BNIP3L,CABLES1,CASP2,CASP6,CD47,CD83,CD8A,CDKN1A,CKS1B,CLIC4,CLSTN1,CNN2,COA5,COTL1,COX5B,CRIP1,CYP7B1,DAB2,DLG4,DNMT3A,DOCK1,DOT1L,DUSP7,EHMT2,EIF1,EP300,EPCAM,EPG5,FABP5,GRIA2,GRIN2B,GRM2,GRM3,GRN,HDAC1,HPRT1,HSPB1,IFNAR2,IGF2R,IRAK2,JAM2,JUN,KAT2A,KAT2B,KDM4D,KDM5C,KDM6A,KMT2C,LACC1,LAMP1,LGMN,LIG1,MAFB,MAFF,…
TF	Factor: Sp1; motif: NGGGGGCGGGGYN	TF:M00196	1.07137e-05	4.97006	10571	221	159	20044	ABCC8,ADRA2A,AGO4,AKT2,APOE,ATG3,ATR,B3GNT5,BAG3,BAG4,BCL2,BMI1,BNIP3,BNIP3L,CABLES1,CASP2,CASP6,CD47,CD83,CD8A,CDKN1A,CKS1B,CLIC4,CLSTN1,CNN2,COTL1,COX5B,CRIP1,CSK,DAB2,DLG4,DNMT3A,DOCK1,DOT1L,DUSP7,EHMT2,EP300,EPCAM,EPG5,FABP5,GRIN2B,GRM2,HDAC1,HPRT1,HSPB1,IFNAR2,IGF2R,IRAK2,JUN,KAT2A,KAT2B,KDM4D,KDM6A,KMT2C,LACC1,LAMP1,LAMP2,LIG1,MAFB,MAFF,MAP3K1,MCM6,MRE11,MSN,MYORG,NFE2L2,NGFR,NLGN1,NPTX1,NQ…
TF	Factor: KLF15; motif: NCCMCGCCCMCN	TF:M12158	1.13002e-05	4.94691	11371	221	167	20044	ABCC8,AGO4,AKT2,APOE,ATG3,ATG5,ATR,B3GNT5,BAG3,BDNF,BECN1,BMI1,BNIP3,BNIP3L,CABLES1,CASP2,CASP6,CD83,CDKN1A,CKS1B,CLIC4,CLSTN1,CNN2,COTL1,COX5B,CRIP1,CSK,DAB2,DLG4,DNMT3A,DOCK1,DOT1L,DUSP7,EHMT2,EIF1,EP300,EPCAM,FABP5,GRIA1,GRIN2B,GRM2,GRM3,HDAC1,HPRT1,HSPB1,IFNAR2,IGF2R,IRAK2,JAM2,JUN,KAT2A,KAT2B,KDM4D,KDM5C,KDM6A,KMT2C,LAMP2,LGMN,LIG1,MAFB,MAFF,MAP3K1,MCM6,MDM2,MRE11,MSN,MYORG,NFE2L2,NGFR,NLGN1…
TF	Factor: ZNF670; motif: SNGGGCRGRG; match class: 1	TF:M13124_1	1.19364e-05	4.92313	8436	221	136	20044	ABCC8,AGO4,AKT2,APOE,ATR,B3GNT5,BAG3,BECN1,BMI1,BNIP3,BNIP3L,CABLES1,CASP2,CASP6,CD47,CD83,CDKN1A,CLIC4,CLSTN1,CNN2,COA5,COTL1,CRIP1,CSK,DAB2,DNMT3A,DOCK1,DOT1L,DUSP7,EHMT2,EP300,EPCAM,FABP5,GRM2,HDAC1,HPRT1,HSPB1,IFNAR2,IGF2R,KAT2B,KDM6A,KMT2C,LACC1,LAMP1,LIG1,MAFB,MAFF,MAP3K1,MCM6,MRE11,MSN,MYORG,NFE2L2,NGFR,NPTX1,NTHL1,OPTN,PAK1,PCNA,PIK3CA,PILRB,PLXDC2,POLE,PPFIA4,PRKACA,PRKAR2B,PTMS,RAB6B,RA…
TF	Factor: WT1; motif: NNGGGNGGGSGN	TF:M07436	1.20244e-05	4.91994	6709	221	116	20044	ABCC8,ADRA2A,AKT2,APOE,BAG3,BAG4,BCL2,BDNF,BECN1,BMI1,CABLES1,CD83,CSK,DAB2,DLG4,DNMT3A,EHMT2,EP300,EPG5,GRIA2,GRIN2B,GRM2,GRM3,HDAC1,HPRT1,HSPB1,IFNAR2,IGF2R,JAM2,JUN,KAT2A,KAT2B,KDM6A,KMT2C,LAMP1,LAMP2,LIG1,MAFB,MAFF,MAP3K1,MDM2,MYORG,NFE2L2,NLGN1,NPTX1,OPTN,OSGIN1,PAK1,PCNA,PIK3CA,POLE,PRKACA,PRKAR2B,PRKCQ,RAB6B,RAD50,RAD51C,RELB,RELN,RHOA,RPA1,SETD1B,SETDB1,SIN3A,SLC6A1,SMC1A,SOD2,SOX9,STMN1,…
TF	Factor: AP-2beta; motif: GCNNNGGSCNGVGGGN	TF:M01858	1.2802e-05	4.89272	7651	221	127	20044	ABCC8,ADRA2A,AGO4,AKT2,APOE,ATG5,B3GNT5,BAG3,BAG4,BMI1,BNIP3,BNIP3L,CASP2,CD83,CD8A,CLSTN1,CNN2,COA5,COTL1,COX5B,CRIP1,DAB2,DNMT3A,DOCK1,DOT1L,DUSP7,EHMT2,EIF1,EP300,EPCAM,GRIA1,GRM2,GRM3,GRN,HPRT1,HSPB1,IGF2R,JAM2,JUN,KAT2B,KDM5C,KDM6A,KMT2C,LAMP1,LGMN,LIG1,MAFB,MCM6,MDM2,MSN,MYORG,NFE2L2,NPTX1,NRP2,NTHL1,OPTN,OSGIN1,PAK1,PIK3CA,POLE,PPFIA4,PRKACA,PRKCQ,PTMS,RAB6B,RAC1,RALB,RELN,RIPK1,RIPK2,S100…
TF	Factor: E2F-4; motif: SNGGGCGGGAANN; match class: 1	TF:M09894_1	1.64843e-05	4.78293	14345	221	194	20044	ABCC8,ADRA2A,AGO4,AKT2,APOE,ATG3,ATR,B3GNT5,BAG3,BAG4,BCL2,BDNF,BECN1,BMI1,BNIP3,BNIP3L,CABLES1,CASP2,CASP6,CD47,CD83,CDKN1A,CKS1B,CLIC4,CLSTN1,CNN2,COTL1,COX5B,CRIP1,CSK,CYP7B1,DAB2,DLG4,DNMT3A,DOCK1,DOT1L,DUSP7,EHMT2,EIF1,EP300,EPCAM,EPG5,FABP5,GRIA2,GRIN2B,GRM2,GRM3,HDAC1,HPRT1,HSPB1,IFNAR2,IGF2R,IRAK2,JAM2,JUN,KAT2A,KAT2B,KDM4D,KDM5C,KDM6A,KMT2C,LACC1,LAMP1,LAMP2,LGMN,LIG1,MAFB,MAFF,MAP3K1,MC…
TF	Factor: ETF; motif: GVGGMGG; match class: 1	TF:M00695_1	1.66203e-05	4.77936	7249	221	122	20044	ADRA2A,AGO4,AKT2,BAG3,BCL2,BDNF,BMI1,BNIP3,BNIP3L,CD47,CLIC4,CLSTN1,CNN2,COA5,COTL1,DLG4,DNMT3A,DOCK1,DOT1L,DUSP7,EHMT2,EIF1,EP300,GRM3,IFNAR2,IGF2R,IRAK2,JUN,KAT2B,KDM5C,KDM6A,KMT2C,LACC1,LAMP1,LAMP2,LGMN,LIG1,MAFB,MAP3K1,MCM6,MDM2,MYORG,NFE2L2,NPTX1,NRP2,OPTN,PAK1,PEX14,PIK3CA,PLXDC2,POLE,PRKACA,PRKAR2A,PRKAR2B,PRKCQ,PROS1,PTMS,RAB6B,RAB7A,RAC1,RALB,RELB,RELN,RHOA,RIPK1,RIPK2,RPL28,SESN1,SETD1B…
TF	Factor: BTEB2; motif: GNAGGGGGNGGGSSNN	TF:M03814	2.04374e-05	4.68958	5306	221	98	20044	AGO4,AKT2,APOE,ATG3,ATR,BAG3,BAG4,BCL2,BDNF,BMI1,CASP2,CASP6,CD83,CD8A,CLSTN1,CNN2,COTL1,CSK,DLG4,DOCK1,EHMT2,EIF1,EP300,EPG5,GRIN2B,GRM2,GRM3,HDAC1,HPRT1,IFNAR2,JAM2,JUN,KAT2A,KAT2B,KDM4D,KDM6A,KMT2C,LAMP2,LIG1,MAFF,MAP3K1,MCM6,MRE11,MYORG,NGFR,PAK1,PIK3CA,PILRB,POLE,PPFIA4,PRKACA,PRKAR2A,PRKAR2B,RAD50,RAD9A,RALB,RELB,RHOA,RIPK1,RPA1,SETD1B,SETDB1,SIN3A,STMN1,SYP,TET1,TMCC3,TMEM64,TNFRSF10B,TRIM…
TF	Factor: Sp1; motif: NNGGGGCGGGGNN; match class: 1	TF:M00932_1	2.11285e-05	4.67513	6271	221	110	20044	ABCC8,ADRA2A,AKT2,ATR,B3GNT5,BAG3,BMI1,BNIP3,BNIP3L,CABLES1,CASP2,CASP6,CD47,CD83,CDKN1A,CLSTN1,CRIP1,DAB2,DNMT3A,DOT1L,DUSP7,EHMT2,EP300,FABP5,GRM2,HDAC1,HPRT1,HSPB1,IFNAR2,IGF2R,KAT2A,KAT2B,KDM6A,KMT2C,LAMP2,LIG1,MAFB,MAFF,MAP3K1,MCM6,MRE11,MSN,MYORG,NFE2L2,NGFR,NPTX1,NTHL1,OPTN,PAK1,PCNA,PEX14,POLE,PRKACA,PRKAR2A,PRKAR2B,PTMS,RAC1,RELB,RELN,RHOA,RIPK1,SESN1,SIN3A,SMC1A,SOD2,SOX9,STMN1,SUV39H2,…
TF	Factor: GCMa:Erg; motif: ATGCGGGCGGAARKG; match class: 1	TF:M08487_1	2.36572e-05	4.62604	9056	221	142	20044	ABCC8,ADRA2A,AGO4,APOE,ATG5,B3GNT5,BAG3,BAG4,BCL2,BDNF,BECN1,BMI1,BNIP3,BNIP3L,CABLES1,CASP2,CD47,CKS1B,CLIC4,CLSTN1,CNN2,COX5B,CRIP1,CSK,DLG4,DNMT3A,DOCK1,DOT1L,DUSP7,EIF1,EP300,EPCAM,FABP5,GRIA2,GRIN2B,GRM2,HDAC1,HSPB1,IGF2R,JAM2,JUN,KAT2A,KAT2B,KDM4D,KDM5C,KDM6A,KMT2C,LAMP1,LGMN,LIG1,MAFB,MAFF,MAP3K1,MCM6,MDM2,MYORG,NCAPH,NFE2L2,NGFR,NLGN1,NPTX1,NRP2,NTHL1,OPTN,PAK1,PIK3CA,POLE,PRKCQ,PTMS,RAB6…
TF	Factor: E2F1; motif: GSGCGGGAAN; match class: 1	TF:M12597_1	2.37858e-05	4.62368	10180	221	154	20044	ABCC8,ADRA2A,AGO4,AKT2,ATG3,ATR,B3GNT5,BAG4,BCL2,BDNF,BMI1,BNIP3,BNIP3L,CABLES1,CASP2,CD47,CD83,CDKN1A,CKS1B,CLIC4,CLSTN1,CNN2,COTL1,CRIP1,DNMT3A,DOCK1,DOT1L,DUSP7,EHMT2,EIF1,EP300,EPCAM,FABP5,GRIA2,GRM2,GRM3,HDAC1,HPRT1,IFNAR2,IGF2R,IRAK2,JAM2,JUN,KAT2A,KAT2B,KDM5C,KDM6A,KMT2C,LACC1,LAMP1,LGMN,LIG1,MAFF,MAP3K1,MDM2,MRE11,MYORG,NCAPH,NFE2L2,NGFR,NPTX1,NQO1,NRP2,NTHL1,OPTN,PAK1,PEX14,PIK3CA,PILRB,…
TF	Factor: ZF5; motif: GSGCGCGR; match class: 1	TF:M00716_1	2.70615e-05	4.56765	14519	221	195	20044	ABCC8,ADRA2A,AGO4,AKT2,APOE,ATG3,ATG5,ATR,B3GNT5,BAG3,BAG4,BCL2,BDNF,BECN1,BMI1,BNIP3,BNIP3L,CABLES1,CASP2,CASP6,CD47,CD83,CD8A,CDKN1A,CKS1B,CLIC4,CLSTN1,CNN2,COA5,COTL1,COX5B,CRIP1,CSK,CYP7B1,DAB2,DNMT3A,DOCK1,DOT1L,DUSP7,EHMT2,EIF1,EP300,EPCAM,EPG5,FABP5,GRIA1,GRIA2,GRIN2B,GRM2,GRN,HDAC1,HPRT1,HSPB1,IFNAR2,IGF2R,IRAK2,JAM2,JUN,KAT2A,KAT2B,KDM4D,KDM6A,KMT2C,LACC1,LAMP1,LGMN,LIG1,MAFB,MAFF,MAP3K1…
TF	Factor: E2F-4; motif: SNGGGCGGGAANN	TF:M09894	2.74314e-05	4.56175	16606	221	211	20044	ABCC8,ADRA2A,AGO4,AKT2,APOE,ATG3,ATG5,ATR,B3GNT5,BAG3,BAG4,BCL2,BDNF,BECN1,BMI1,BNIP3,BNIP3L,CABLES1,CASP2,CASP6,CD47,CD83,CD8A,CDKN1A,CKS1B,CLIC4,CLSTN1,CNN2,COA5,COTL1,COX5B,CRIP1,CSK,CYP7B1,DAB2,DLG4,DNMT3A,DOCK1,DOT1L,DUSP7,EHMT2,EIF1,EP300,EPCAM,EPG5,FABP5,GRIA1,GRIA2,GRIN2B,GRM2,GRM3,GRN,GSN,HDAC1,HPRT1,HSPB1,IFNAR2,IGF2R,IRAK2,JAM2,JUN,KAT2A,KAT2B,KDM4D,KDM5C,KDM6A,KMT2C,LACC1,LAMP1,LAMP2,…
TF	Factor: MAZ; motif: GGGGGAGGGGGNGRGRRRGNRG; match class: 1	TF:M09984_1	3.49871e-05	4.45609	5755	221	103	20044	ABCC8,ADRA2A,AGO4,AKT2,APOE,B3GNT5,BAG3,BCL2,BDNF,BMI1,BNIP3L,CABLES1,CASP2,CASP6,CD83,CLSTN1,COTL1,DLG4,DNMT3A,DOCK1,DOT1L,DUSP7,EHMT2,GRIA1,GRIN2B,GRM2,GRM3,HDAC1,HPRT1,IFNAR2,IGF2R,JAM2,JUN,KAT2A,KAT2B,KDM6A,KMT2C,LAMP2,LIG1,MAFF,MAP3K1,MEF2C,NGFR,NLGN1,NPTX1,OPTN,PAK1,PEX14,PIK3CA,PILRB,POLE,PPFIA4,PRKAR2B,PTMS,RAB6B,RAD51B,RAD9A,RELB,RPA1,SETD1B,SETDB1,SOD2,SOX9,STMN1,SUV39H2,SYP,TET1,TMCC3,…
TF	Factor: WT1; motif: CGCCCCCNCN	TF:M02036	4.27332e-05	4.36923	10058	221	152	20044	ABCC8,ADRA2A,AGO4,AKT2,APOE,ATG3,B3GNT5,BAG3,BAG4,BCL2,BDNF,BECN1,BMI1,BNIP3,BNIP3L,CABLES1,CASP2,CASP6,CD47,CD83,CD8A,CKS1B,CLIC4,CLSTN1,CNN2,COTL1,COX5B,CRIP1,DAB2,DLG4,DNMT3A,DOCK1,DOT1L,DUSP7,EHMT2,EP300,EPCAM,FABP5,GRIA2,GRIN2B,GRM2,HDAC1,HPRT1,HSPB1,IFNAR2,IGF2R,JAM2,JUN,KAT2A,KAT2B,KDM4D,KMT2C,LACC1,LAMP1,LGMN,LIG1,MAFB,MAFF,MAP3K1,MCM6,MRE11,NFE2L2,NGFR,NPTX1,NRP2,OPTN,PAK1,PCNA,PEX14,PIK…
TF	Factor: TCF-1; motif: ACATCGRGRCGCTGW; match class: 1	TF:M11603_1	4.55869e-05	4.34116	13544	221	186	20044	ABCC8,ADRA2A,AGO4,AKT2,ATG3,ATG5,B3GNT5,BAG3,BAG4,BCL2,BDNF,BECN1,BMI1,BNIP3,BNIP3L,CASP2,CASP6,CD47,CD83,CD8A,CDKN1A,CKS1B,CLIC4,CLSTN1,CNN2,COA5,COTL1,COX5B,CRIP1,CSK,CYP7B1,DNMT3A,DOCK1,DOT1L,DUSP7,EHMT2,EIF1,EP300,EPCAM,EPG5,FABP5,GRIA2,GRIN2B,GRM2,GRM3,GRN,HDAC1,HPRT1,HSPB1,IFNAR2,IGF2R,IRAK2,JAM2,JUN,KAT2A,KAT2B,KDM5C,KDM6A,KMT2C,LACC1,LAMP1,LGMN,LIG1,MAFB,MAFF,MAP3K1,MCM6,MDM2,MYORG,NCAPH,…
TF	Factor: ctcf; motif: CCRSCAGGGGGCGCN	TF:M10426	4.57753e-05	4.33937	9595	221	147	20044	ABCC8,ADRA2A,AGO4,AKT2,ATG3,ATG5,ATR,B3GNT5,BAG3,BAG4,BCL2,BMI1,BNIP3,CABLES1,CASP2,CASP6,CD47,CD83,CD8A,CDKN1A,CLIC4,CLSTN1,COA5,CRIP1,CSK,DAB2,DLG4,DNMT3A,DOCK1,DOT1L,DUSP7,EIF1,EP300,EPCAM,FABP5,GRIA2,GRIN2B,GRM3,GRN,HPRT1,HSPB1,IFNAR2,IGF2R,IRAK2,JAM2,JUN,KAT2B,KDM6A,KMT2C,LACC1,LAMP1,LIG1,MAFB,MAFF,MAP3K1,MDM2,MYORG,NFE2L2,NGFR,NLGN1,NPTX1,NTHL1,OPTN,PAK1,PCNA,PEX14,PIK3CA,PILRB,POLE,PRKAR2A…
TF	Factor: E2F-2; motif: GCGCGCGCGYW	TF:M11531	4.6896e-05	4.32886	13659	221	187	20044	ABCC8,ADRA2A,AGO4,AKT2,APOE,ATG3,ATG5,B3GNT5,BAG3,BAG4,BCL2,BDNF,BECN1,BMI1,BNIP3,BNIP3L,CABLES1,CASP2,CASP6,CD47,CD83,CD8A,CDKN1A,CKS1B,CLIC4,CLSTN1,CNN2,COA5,COTL1,COX5B,CRIP1,CYP7B1,DAB2,DLG4,DNMT3A,DOCK1,DOT1L,DUSP7,EHMT2,EIF1,EP300,EPCAM,EPG5,FABP5,GRIA2,GRIN2B,GRM2,GRM3,GRN,HPRT1,HSPB1,IFNAR2,IGF2R,IRAK2,JAM2,JUN,KAT2A,KAT2B,KDM4D,KDM6A,KMT2C,LACC1,LAMP1,LGMN,LIG1,MAFB,MAFF,MAP3K1,MCM6,MDM2…
TF	Factor: CTCF; motif: NCCRSTAGGGGGCGC; match class: 1	TF:M08911_1	4.69676e-05	4.3282	4089	221	81	20044	ABCC8,AGO4,AKT2,B3GNT5,BAG3,BCL2,BMI1,CASP6,CD83,CLSTN1,COA5,COTL1,CRIP1,DAB2,DNMT3A,DOCK1,DUSP7,EIF1,EP300,EPCAM,GRN,HPRT1,JUN,KAT2B,KDM6A,KMT2C,LACC1,LIG1,MAFF,MAP3K1,MYORG,NFE2L2,NGFR,NPTX1,NTHL1,OPTN,PAK1,PEX14,POLE,PRKACA,PRKAR2B,PRKCQ,PTMS,RAB6B,RAD9A,RALB,RELN,RPL28,SIN3A,SLC44A1,SOX9,STMN1,TMEM64,TNFRSF1A,TP53,TRIM47,TSPAN18,ABL1,ACTN1,APAF1,ARHGEF10,ATP6V0E1,CACNA1C,CLU,CNR1,COL4A2,CXXC1…
TF	Factor: Sp1; motif: RGGGMGGRGSNGGGG	TF:M10529	4.74388e-05	4.32387	7107	221	119	20044	ABCC8,ADRA2A,AGO4,AKT2,APOE,ASB2,ATF3,B3GNT5,BAG3,BCL2,BDNF,BMI1,BNIP3,BNIP3L,CABLES1,CD47,CD83,CD8A,CDKN1A,CLSTN1,CNN2,DAB2,DLG4,DNMT3A,EHMT2,EP300,EPCAM,EPG5,FABP5,GRIN2B,GRM3,HPRT1,IFNAR2,IGF2R,JUN,KAT2A,KAT2B,KDM4D,KDM6A,KMT2C,LIG1,MAFF,MAP3K1,MCM6,MDM2,MEF2C,NFE2L2,NGFR,NLGN1,NPTX1,NRP2,NTHL1,OPTN,PAK1,PEX14,PILRB,POLE,PPFIA4,PRKAR2B,PTMS,RAB7A,RAD9A,RALB,RELB,RELN,RHOA,RIPK2,RPA1,RPL28,SETD…
TF	Factor: sp4; motif: NNGNARGRGGCGGRGCNNRR	TF:M10072	4.78859e-05	4.31979	10844	221	160	20044	ABCC8,ADRA2A,AGO4,AKT2,APOE,ATG3,ATR,B3GNT5,BAG3,BAG4,BCL2,BDNF,BMI1,BNIP3,BNIP3L,CABLES1,CASP2,CASP6,CD47,CD83,CD8A,CLIC4,CLSTN1,CNN2,COTL1,COX5B,CRIP1,CSK,DAB2,DNMT3A,DOT1L,DUSP7,EHMT2,EIF1,EP300,EPCAM,FABP5,GRIN2B,GRM2,HDAC1,HPRT1,HSPB1,IFNAR2,IGF2R,IRAK2,JAM2,KAT2A,KAT2B,KDM4D,KDM6A,KMT2C,LACC1,LAMP1,LAMP2,LIG1,MAFB,MAFF,MAP3K1,MCM6,MRE11,MSN,MYORG,NFE2L2,NGFR,NLGN1,NPTX1,NTHL1,OPTN,PAK1,PCNA…
TF	Factor: Sp1; motif: NGGGGGCGGGGCCNGGGGGGGG	TF:M10071	4.9542e-05	4.30503	8777	221	138	20044	ABCC8,ADRA2A,AGO4,AKT2,APOE,ATG3,ATR,B3GNT5,BAG3,BAG4,BMI1,BNIP3,BNIP3L,CABLES1,CASP2,CASP6,CD47,CD83,CKS1B,CLIC4,CLSTN1,CNN2,COTL1,CRIP1,DAB2,DLG4,DNMT3A,DOCK1,DOT1L,DUSP7,EHMT2,EP300,EPCAM,FABP5,GRM2,HDAC1,HPRT1,HSPB1,IFNAR2,IGF2R,IRAK2,KAT2A,KAT2B,KDM4D,KDM6A,KMT2C,LACC1,LAMP1,LAMP2,LIG1,MAFF,MAP3K1,MCM6,MRE11,MSN,MYORG,NFE2L2,NGFR,NPTX1,NRP2,NTHL1,OPTN,PAK1,PCNA,PEX14,PIK3CA,PLXDC2,POLE,PPFIA…
TF	Factor: GKLF; motif: NNRRGRRNGNSNNN; match class: 1	TF:M07040_1	5.06374e-05	4.29553	8420	221	134	20044	ADRA2A,AGO4,AKT2,APOE,ATG3,ATR,BAG3,BAG4,BCL2,BDNF,BECN1,BMI1,CASP2,CD83,CLSTN1,CNN2,COTL1,COX5B,CRIP1,DLG4,DNMT3A,DOCK1,DOT1L,DUSP7,EHMT2,EIF1,EP300,EPCAM,GRIA1,GRIA2,GRIN2B,GRM2,HDAC1,HSPB1,IFNAR2,IRAK2,JAM2,JUN,KAT2A,KAT2B,KDM4D,KDM6A,KMT2C,LACC1,LAMP2,LIG1,MAP3K1,MDM2,MEF2C,MSN,MYORG,NCAPH,NGFR,NPTX1,NTHL1,OPTN,PAK1,PEX14,PIK3CA,PILRB,PLXDC2,POLE,PPFIA4,PRKACA,PRKAR2B,PTMS,RAB6B,RAC1,RAD51C,R…
TF	Factor: MOVO-B; motif: GNGGGGG	TF:M01104	5.63558e-05	4.24906	10571	221	157	20044	ABCC8,ADRA2A,AGO4,AKT2,APOE,ATR,B3GNT5,BAG3,BAG4,BDNF,BMI1,BNIP3,BNIP3L,CABLES1,CASP6,CD47,CD83,CD8A,CKS1B,CLIC4,CLSTN1,CNN2,COTL1,COX5B,CRIP1,CSK,DAB2,DLG4,DNMT3A,DOCK1,DOT1L,DUSP7,EHMT2,EP300,EPCAM,GRIA2,GRIN2B,GRM2,HDAC1,HPRT1,HSPB1,IFNAR2,IGF2R,JUN,KAT2A,KAT2B,KDM5C,KDM6A,KMT2C,LACC1,LAMP1,LGMN,LIG1,MAFB,MAFF,MAP3K1,MYORG,NCAPH,NFE2L2,NLGN1,NPTX1,NRP2,NTHL1,OPTN,PAK1,PCNA,PIK3CA,PLXDC2,POLE,P…
TF	Factor: Sp1; motif: NGGGGGCGGGGCCNGGGGGGGG; match class: 1	TF:M10071_1	5.91442e-05	4.22809	4787	221	90	20044	ABCC8,APOE,B3GNT5,BAG3,BNIP3,BNIP3L,CABLES1,CASP6,CD83,CLIC4,CLSTN1,COTL1,CRIP1,DNMT3A,DOT1L,DUSP7,EHMT2,EP300,EPCAM,FABP5,GRM2,HDAC1,HPRT1,HSPB1,IFNAR2,IGF2R,KAT2A,KAT2B,KMT2C,LACC1,LIG1,MAFF,MAP3K1,MRE11,MSN,MYORG,NGFR,NPTX1,OPTN,PAK1,PCNA,PEX14,POLE,PPFIA4,PRKACA,PRKAR2B,PTMS,RAD9A,RALB,RELB,RELN,RHOA,RIPK1,SESN1,SMC1A,SOD2,SOX9,STMN1,SUV39H2,SYP,TMCC3,TMEM64,TRIM47,TSPAN18,VPS4A,ABL1,ACTN1,AD…
TF	Factor: WT1; motif: CGCCCCCNCN; match class: 1	TF:M02036_1	5.92538e-05	4.22728	5489	221	99	20044	ABCC8,AGO4,AKT2,APOE,B3GNT5,BCL2,BMI1,BNIP3,CABLES1,CASP2,CASP6,CD83,CLIC4,CNN2,COTL1,COX5B,CRIP1,DAB2,DNMT3A,DOCK1,DUSP7,EHMT2,EP300,GRM2,HDAC1,HPRT1,HSPB1,IFNAR2,IGF2R,JAM2,JUN,KAT2B,KDM4D,KMT2C,LAMP1,LIG1,MAFF,MAP3K1,NFE2L2,NGFR,NPTX1,NRP2,OPTN,PAK1,PIK3CA,PLXDC2,POLE,PRKACA,PRKAR2B,PRKCQ,PTMS,RAD9A,RALB,RELB,RELN,RHOA,RPA1,SETD1B,SIN3A,SOX9,STMN1,SYP,TARBP2,TMCC3,TMEM64,VPS4A,ACTN1,ADCY9,ADCY…
TF	Factor: Churchill; motif: CGGGNN; match class: 1	TF:M00986_1	7.90886e-05	4.10189	10709	221	158	20044	ABCC8,ADRA2A,AKT2,APOE,ATR,B3GNT5,BAG3,BAG4,BCL2,BECN1,BMI1,BNIP3,BNIP3L,CABLES1,CASP6,CD47,CD83,CKS1B,CLIC4,CLSTN1,CNN2,COA5,COTL1,COX5B,CRIP1,DAB2,DLG4,DNMT3A,DOCK1,DOT1L,DUSP7,EHMT2,EIF1,EP300,EPCAM,GRIA2,GRIN2B,GRM2,HDAC1,HPRT1,HSPB1,IFNAR2,IGF2R,JUN,KAT2A,KAT2B,KDM6A,KMT2C,LAMP1,LAMP2,LIG1,MAFB,MAFF,MAP3K1,MDM2,MYORG,NFE2L2,NLGN1,NPTX1,NRP2,NTHL1,OPTN,PAK1,PCNA,PEX14,PIK3CA,PLXDC2,POLE,PPFIA…
TF	Factor: ZBP99; motif: NGGNGGGGGAGGGGN	TF:M10137	8.75317e-05	4.05783	624	221	25	20044	BAG3,BDNF,BMI1,CD83,DLG4,DNMT3A,DOT1L,EHMT2,EPCAM,HDAC1,KAT2B,KDM6A,KMT2C,LIG1,NPTX1,NQO1,PAK1,SETDB1,SUV39H2,TET1,TSPAN18,ADCYAP1,CACNA1C,GAD1,PPP3CA
TF	Factor: SP1; motif: GGCCCCGCCCCCN	TF:M12666	9.24979e-05	4.03387	8941	221	139	20044	ABCC8,ADRA2A,AGO4,APOE,ATG3,ATR,B3GNT5,BAG3,BAG4,BMI1,BNIP3,BNIP3L,CABLES1,CASP2,CASP6,CD47,CD83,CD8A,CDKN1A,CKS1B,CLIC4,CLSTN1,CNN2,COTL1,COX5B,CRIP1,CSK,DNMT3A,DOCK1,DOT1L,DUSP7,EHMT2,EIF1,EP300,EPCAM,EPG5,FABP5,GRM2,HDAC1,HPRT1,HSPB1,IFNAR2,IGF2R,IRAK2,JUN,KAT2A,KAT2B,KDM4D,KDM6A,KMT2C,LAMP2,LGMN,LIG1,MAFB,MAFF,MAP3K1,MCM6,MRE11,MSN,MYORG,NGFR,NPTX1,NRP2,NTHL1,OPTN,PAK1,PCNA,PEX14,PIK3CA,PLXDC…
TF	Factor: RREB-1; motif: GGGWCSA	TF:M05439	9.39237e-05	4.02722	8852	221	138	20044	ADRA2A,AGO4,ATF3,ATG3,BAG3,BAG4,BCL2,BDNF,BMI1,BNIP3,BNIP3L,CASP2,CASP6,CD47,CD83,CD8A,CDKN1A,CLSTN1,CNN2,COA5,COTL1,CRIP1,CYP7B1,DAB2,DLG4,DNMT3A,DOCK1,DOT1L,DUSP7,EHMT2,EP300,FABP5,GRIN2B,GRM2,GRN,HSPB1,IFNAR2,IGF2R,IRAK2,JAM2,JUN,KAT2B,KDM4D,KDM5C,KDM6A,KMT2C,LACC1,LAMP1,LAMP2,LIG1,MAFB,MAP3K1,MDM2,MRE11,MSN,MYORG,NCAPH,NFE2L2,NGFR,NPTX1,NQO1,NRP2,NTHL1,OPTN,OSGIN1,PAK1,PIK3CA,PLXDC2,POLE,PPFI…
TF	Factor: CPBP; motif: GNNRGGGHGGGGNNGGGRN; match class: 1	TF:M09973_1	9.63077e-05	4.01634	6847	221	115	20044	ABCC8,ADRA2A,AKT2,APOE,B3GNT5,BAG3,BDNF,BMI1,BNIP3,BNIP3L,CABLES1,CASP2,CD83,CLIC4,CLSTN1,CNN2,COTL1,CRIP1,DLG4,DNMT3A,DOT1L,DUSP7,EHMT2,EIF1,EP300,EPCAM,FABP5,GRIN2B,GRM2,HDAC1,HPRT1,IFNAR2,IGF2R,IRAK2,JAM2,KAT2A,KAT2B,KDM6A,KMT2C,LIG1,MAP3K1,MEF2C,MSN,NFE2L2,NGFR,NPTX1,NTHL1,OPTN,PAK1,PCNA,PEX14,PIK3CA,PILRB,PLXDC2,POLE,PPFIA4,PRKACA,PRKAR2B,PTMS,RAB6B,RALB,RELB,RELN,RHOA,RPA1,SESN1,SETD1B,SIN3…
TF	Factor: WT1; motif: SMCNCCNSC	TF:M01118	0.000109555	3.96037	7030	221	117	20044	ABCC8,ADRA2A,AKT2,APOE,BAG3,BAG4,BCL2,BDNF,BECN1,BMI1,BNIP3,CD83,CLIC4,CLSTN1,CNN2,COA5,COTL1,CRIP1,DAB2,DLG4,DNMT3A,DOT1L,DUSP7,EHMT2,EIF1,EPCAM,GRIA2,GRIN2B,GRM3,HDAC1,HSPB1,IRAK2,JUN,KAT2A,KAT2B,KDM4D,KDM6A,KMT2C,LACC1,LAMP2,LIG1,MAFB,MAP3K1,MEF2C,MYORG,NCAPH,NGFR,NPTX1,NQO1,NTHL1,OPTN,PAK1,PEX14,PIK3CA,PLXDC2,POLE,PRKACA,PRKAR2B,PRKCQ,RAB6B,RAC1,RAD51B,RAD51C,RELN,RHOA,RIPK1,RIPK2,RPA1,SESN1,…
TF	Factor: E2F; motif: GGCGSG	TF:M00803	0.000139762	3.85461	13566	221	185	20044	ABCC8,ADRA2A,AGO4,AKT2,ATG3,ATG5,B3GNT5,BAG3,BCL2,BECN1,BMI1,BNIP3,BNIP3L,CABLES1,CASP2,CASP6,CD47,CD83,CD8A,CDKN1A,CKS1B,CLIC4,CLSTN1,CNN2,COA5,COTL1,COX5B,CRIP1,CYP7B1,DAB2,DNMT3A,DOCK1,DOT1L,DUSP7,EHMT2,EIF1,EP300,EPCAM,EPG5,FABP5,GRIA1,GRIA2,GRIN2B,GRM2,GRM3,GRN,HPRT1,HSPB1,IFNAR2,IGF2R,IRAK2,JAM2,JUN,KAT2A,KAT2B,KDM4D,KDM5C,KDM6A,KMT2C,LAMP1,LGMN,LIG1,MAFB,MAFF,MAP3K1,MCM6,MDM2,MSN,MYORG,NCA…
TF	Factor: ZIC4; motif: NNCCNCCCRYNGYGN	TF:M12227	0.000147014	3.83264	11376	221	164	20044	ABCC8,ADRA2A,AGO4,AKT2,APOE,ATG3,B3GNT5,BAG3,BAG4,BCL2,BDNF,BMI1,BNIP3,CABLES1,CASP2,CASP6,CD47,CD83,CD8A,CDKN1A,CKS1B,CLIC4,CLSTN1,CNN2,COA5,CRIP1,CSK,CYP7B1,DLG4,DNMT3A,DOCK1,DOT1L,DUSP7,EIF1,EP300,EPCAM,EPG5,FABP5,GRIA2,GRIN2B,GRN,HDAC1,HPRT1,HSPB1,IFNAR2,IGF2R,IRAK2,JAM2,JUN,KAT2A,KAT2B,KDM5C,KDM6A,KMT2C,LAMP1,LIG1,MAFB,MAP3K1,MDM2,MSN,MYORG,NCAPH,NFE2L2,NGFR,NLGN1,NPTX1,NTHL1,OPTN,OSGIN1,PAK…
TF	Factor: Sp1; motif: CCCCGCCCCN; match class: 1	TF:M00933_1	0.000171088	3.76678	5359	221	96	20044	AKT2,APOE,B3GNT5,BAG3,BDNF,BMI1,BNIP3,BNIP3L,CABLES1,CASP6,CD83,CLSTN1,CRIP1,DLG4,DNMT3A,DOT1L,DUSP7,EHMT2,EP300,EPCAM,GRM2,HDAC1,HPRT1,HSPB1,IFNAR2,IGF2R,KAT2A,KAT2B,KDM6A,KMT2C,LAMP2,LIG1,MAFF,MAP3K1,MRE11,MYORG,NGFR,NPTX1,OPTN,PAK1,PCNA,PEX14,POLE,PRKACA,PRKAR2B,RAC1,RELB,RELN,RHOA,SESN1,SETDB1,SIN3A,SMC1A,SOD2,SOX9,STMN1,SUV39H2,SYP,TET1,TMEM64,TNFRSF10B,TRPM4,TSPAN18,VPS4A,ABL1,ACTN1,ADCY9,A…
TF	Factor: Sp2; motif: GGGGCGGGG	TF:M10435	0.000176209	3.75397	7946	221	127	20044	ABCC8,ADRA2A,AKT2,APOE,ATG3,ATR,B3GNT5,BAG3,BMI1,BNIP3,BNIP3L,CABLES1,CASP2,CASP6,CD47,CD83,CDKN1A,CLIC4,CLSTN1,COTL1,COX5B,CRIP1,DAB2,DLG4,DNMT3A,DOT1L,DUSP7,EHMT2,EP300,EPCAM,FABP5,GRM2,HDAC1,HPRT1,HSPB1,IFNAR2,IGF2R,KAT2A,KAT2B,KDM4D,KMT2C,LACC1,LAMP2,LIG1,MAFB,MAFF,MAP3K1,MCM6,MRE11,MYORG,NFE2L2,NGFR,NPTX1,OPTN,PAK1,PCNA,PEX14,PIK3CA,PLXDC2,POLE,PPFIA4,PRKACA,PRKAR2B,PTMS,RAB6B,RAC1,RAD50,RAD…
TF	Factor: MAZ; motif: GGGMGGGGS	TF:M10432	0.000178206	3.74908	9572	221	145	20044	ABCC8,ADRA2A,AKT2,APOE,ATG3,ATG5,B3GNT5,BAG3,BAG4,BDNF,BMI1,BNIP3,BNIP3L,CABLES1,CASP2,CD83,CD8A,CLIC4,CLSTN1,CNN2,COTL1,CRIP1,CYP7B1,DAB2,DLG4,DNMT3A,DOT1L,DUSP7,EHMT2,EIF1,EP300,EPCAM,GRIA1,GRIA2,GRIN2B,GRM2,GRM3,HDAC1,HPRT1,HSPB1,IFNAR2,IGF2R,JAM2,JUN,KAT2A,KAT2B,KDM4D,KDM6A,KMT2C,LACC1,LAMP1,LAMP2,LIG1,MAFB,MAFF,MAP3K1,MEF2C,MYORG,NFE2L2,NGFR,NLGN1,NPTX1,OPTN,PAK1,PEX14,PIK3CA,PILRB,POLE,PPFI…
TF	Factor: E2F; motif: GGCGSG; match class: 1	TF:M00803_1	0.000204003	3.69036	10535	221	155	20044	ABCC8,ADRA2A,AGO4,AKT2,ATG3,ATG5,B3GNT5,BAG3,BCL2,BECN1,BMI1,BNIP3,BNIP3L,CASP2,CASP6,CD47,CD83,CD8A,CDKN1A,CKS1B,CLIC4,CLSTN1,CNN2,COA5,COTL1,COX5B,CRIP1,CYP7B1,DNMT3A,DOCK1,DOT1L,DUSP7,EHMT2,EIF1,EP300,EPCAM,EPG5,FABP5,GRIA2,GRIN2B,GRM2,GRN,HPRT1,HSPB1,IFNAR2,IGF2R,IRAK2,JUN,KAT2A,KAT2B,KDM6A,KMT2C,LAMP1,LGMN,LIG1,MAFB,MAFF,MAP3K1,MCM6,MDM2,MSN,NCAPH,NFE2L2,NGFR,NLGN1,NPTX1,NRP2,NTHL1,PAK1,PCNA…
TF	Factor: ZNF460; motif: NNACNCCCCCCNN	TF:M12313	0.000216923	3.6637	6026	221	104	20044	ABCC8,AGO4,AKT2,BAG4,BCL2,BDNF,BECN1,BMI1,BNIP3,BNIP3L,CD83,CKS1B,CLIC4,CLSTN1,CNN2,COTL1,CRIP1,DAB2,DLG4,DNMT3A,DOCK1,DUSP7,EHMT2,EP300,GRIN2B,GRM2,IGF2R,IRAK2,JUN,KAT2A,KDM4D,KDM6A,KMT2C,LIG1,MAFB,MAP3K1,MCM6,MDM2,MYORG,NCAPH,NGFR,NTHL1,PAK1,PEX14,PLXDC2,POLE,PPFIA4,PTMS,RAB6B,RAD51C,RAD9A,RALB,RELN,RIPK2,RPA1,SESN1,SETD1B,SIN3A,SMC1A,SOD2,SOX9,STMN1,SUV39H2,TARBP2,TMCC3,TP53,TRPM4,ABL1,ACTN1,A…
TF	Factor: Sp1; motif: NNGGGGCGGGGNN	TF:M00932	0.000242504	3.61528	10750	221	157	20044	ABCC8,ADRA2A,AKT2,APOE,ATG3,ATR,B3GNT5,BAG3,BAG4,BDNF,BMI1,BNIP3,BNIP3L,CABLES1,CASP2,CASP6,CD47,CD83,CD8A,CDKN1A,CKS1B,CLIC4,CLSTN1,CNN2,COTL1,COX5B,CRIP1,CSK,DAB2,DLG4,DNMT3A,DOT1L,DUSP7,EHMT2,EP300,EPCAM,FABP5,GRIN2B,GRM2,HDAC1,HPRT1,HSPB1,IFNAR2,IGF2R,IRAK2,JUN,KAT2A,KAT2B,KDM4D,KDM6A,KMT2C,LACC1,LAMP1,LAMP2,LIG1,MAFB,MAFF,MAP3K1,MCM6,MRE11,MSN,MYORG,NCAPH,NFE2L2,NGFR,NLGN1,NPTX1,NQO1,NRP2,NT…
TF	Factor: ZNF670; motif: SNGGGCRGRG	TF:M13124	0.000244905	3.611	13091	221	180	20044	ABCC8,ADRA2A,AGO4,AKT2,APOE,ATG3,ATG5,ATR,B3GNT5,BAG3,BAG4,BCL2,BDNF,BECN1,BMI1,BNIP3,BNIP3L,CABLES1,CASP2,CASP6,CD47,CD83,CD8A,CDKN1A,CLIC4,CLSTN1,CNN2,COA5,COTL1,COX5B,CRIP1,CSK,DAB2,DLG4,DNMT3A,DOCK1,DOT1L,DUSP7,EHMT2,EIF1,EP300,EPCAM,FABP5,GRIA1,GRIA2,GRIN2B,GRM2,GRM3,GSN,HDAC1,HPRT1,HSPB1,IFNAR2,IGF2R,IRAK2,JAM2,KAT2A,KAT2B,KDM6A,KMT2C,LACC1,LAMP1,LAMP2,LIG1,MAFB,MAFF,MAP3K1,MCM6,MRE11,MSN,M…
TF	Factor: SP1; motif: GGGGYGGGGNS	TF:M01303	0.000277344	3.55698	8176	221	129	20044	ABCC8,ADRA2A,AKT2,APOE,ATG3,B3GNT5,BAG3,BCL2,BDNF,BMI1,BNIP3,BNIP3L,CABLES1,CASP6,CD47,CD83,CDKN1A,CLIC4,CLSTN1,COTL1,CRIP1,DAB2,DLG4,DNMT3A,DOCK1,DOT1L,DUSP7,EHMT2,EP300,EPCAM,FABP5,GRIN2B,GRM2,HDAC1,HPRT1,HSPB1,IFNAR2,IGF2R,JAM2,KAT2A,KAT2B,KDM4D,KDM6A,KMT2C,LAMP2,LIG1,MAFB,MAFF,MAP3K1,MCM6,MYORG,NGFR,NLGN1,OPTN,PAK1,PCNA,PIK3CA,PLXDC2,POLE,PPFIA4,PRKACA,PRKAR2B,PTMS,RAB6B,RAC1,RAD9A,RALB,RELB,…
TF	Factor: Sp1; motif: NGGGGCGGGGN	TF:M07395	0.000323013	3.49078	10981	221	159	20044	ABCC8,ADRA2A,AGO4,AKT2,APOE,ATG3,ATR,B3GNT5,BAG3,BAG4,BCL2,BMI1,BNIP3,BNIP3L,CABLES1,CASP2,CASP6,CD47,CD83,CD8A,CDKN1A,CKS1B,CLIC4,CLSTN1,COTL1,COX5B,CRIP1,CSK,DAB2,DLG4,DNMT3A,DOCK1,DOT1L,DUSP7,EHMT2,EP300,EPCAM,EPG5,FABP5,GRIN2B,GRM2,HDAC1,HPRT1,HSPB1,IFNAR2,IGF2R,IRAK2,JAM2,JUN,KAT2A,KAT2B,KDM4D,KDM6A,KMT2C,LACC1,LAMP1,LAMP2,LIG1,MAFB,MAFF,MAP3K1,MCM6,MRE11,MSN,MYORG,NFE2L2,NGFR,NLGN1,NPTX1,NR…
TF	Factor: E2F-3; motif: GGCGGGN	TF:M02089	0.000324826	3.48835	13559	221	184	20044	ABCC8,ADRA2A,AGO4,AKT2,APOE,ATG3,ATG5,ATR,B3GNT5,BAG3,BAG4,BCL2,BDNF,BMI1,BNIP3,BNIP3L,CABLES1,CASP2,CASP6,CD47,CD83,CD8A,CDKN1A,CKS1B,CLIC4,CLSTN1,CNN2,COTL1,COX5B,CRIP1,CSK,CYP7B1,DAB2,DLG4,DNMT3A,DOCK1,DOT1L,DUSP7,EHMT2,EIF1,EP300,EPCAM,FABP5,GRIA2,GRIN2B,GRM2,HDAC1,HPRT1,HSPB1,IFNAR2,IGF2R,IRAK2,KAT2A,KAT2B,KDM4D,KDM6A,KMT2C,LACC1,LAMP1,LAMP2,LIG1,MAFB,MAFF,MAP3K1,MCM6,MDM2,MRE11,MSN,MYORG,NC…
TF	Factor: E2F; motif: NNTTTCGCGCN	TF:M08875	0.000355747	3.44886	6409	221	108	20044	ABCC8,ADRA2A,AKT2,ATG3,ATG5,B3GNT5,BDNF,BMI1,BNIP3,BNIP3L,CASP2,CASP6,CD47,CD83,CKS1B,CLIC4,CRIP1,CYP7B1,DOT1L,EHMT2,EP300,EPG5,FABP5,GRIA2,GRM3,HPRT1,IGF2R,JAM2,KDM6A,KMT2C,LACC1,LIG1,MAFB,MCM6,MDM2,MSN,MYORG,NFE2L2,NPTX1,NRP2,PAK1,PCNA,PIK3CA,PLXDC2,POLE,PRKAR2A,PRKAR2B,RAD50,RAD51B,RAD51C,RAD9A,RALB,RELB,RHOA,RIPK1,RIPK2,RPA1,S100A10,SETD1B,SETDB1,SLC44A1,SLC6A1,SMC1A,SOX9,STMN1,SUV39H1,SUV39H…
TF	Factor: Sp1; motif: GGGGCGGGGC	TF:M00931	0.000355861	3.44872	10605	221	155	20044	ABCC8,ADRA2A,AKT2,APOE,ATG3,ATR,B3GNT5,BAG3,BAG4,BCL2,BMI1,BNIP3,BNIP3L,CABLES1,CASP2,CASP6,CD47,CD83,CD8A,CDKN1A,CKS1B,CLIC4,CLSTN1,COTL1,COX5B,CRIP1,CSK,DAB2,DLG4,DNMT3A,DOT1L,DUSP7,EHMT2,EP300,EPCAM,FABP5,GRIA2,GRIN2B,GRM2,HDAC1,HPRT1,HSPB1,IFNAR2,IGF2R,IRAK2,KAT2A,KAT2B,KDM4D,KDM6A,KMT2C,LACC1,LAMP1,LAMP2,LIG1,MAFB,MAFF,MAP3K1,MCM6,MRE11,MSN,MYORG,NCAPH,NFE2L2,NGFR,NLGN1,NPTX1,NQO1,NRP2,NTHL1…
TF	Factor: RNF96; motif: BCCCGCRGCC	TF:M01199	0.00037407	3.42705	8748	221	135	20044	ADRA2A,AGO4,AKT2,ATG3,ATG5,B3GNT5,BAG3,BCL2,BDNF,BECN1,BMI1,BNIP3,BNIP3L,CABLES1,CASP6,CLIC4,CLSTN1,CNN2,COA5,COTL1,CRIP1,CSK,CYP7B1,DLG4,DNMT3A,DOCK1,DOT1L,DUSP7,EHMT2,EIF1,EP300,HDAC1,HPRT1,HSPB1,IFNAR2,IGF2R,JUN,KAT2B,KDM5C,KDM6A,KMT2C,LACC1,LAMP1,LGMN,LIG1,MAFB,MAFF,MAP3K1,MDM2,NFE2L2,NGFR,NPTX1,NTHL1,OPTN,PCNA,PIK3CA,POLE,PPFIA4,PRKACA,PRKAR2A,PTMS,RAB6B,RAB7A,RAC1,RALB,RELB,RELN,RHOA,RIPK1,…
TF	Factor: SP2; motif: GNNGGGGGCGGGGSN; match class: 1	TF:M03807_1	0.000380058	3.42015	4356	221	82	20044	ABCC8,AKT2,B3GNT5,BAG3,BNIP3,BNIP3L,CABLES1,CASP6,CD83,CLIC4,CLSTN1,DOT1L,DUSP7,EHMT2,EP300,EPCAM,FABP5,GRM2,HDAC1,HPRT1,HSPB1,IFNAR2,IGF2R,KAT2A,KAT2B,KMT2C,LAMP2,LIG1,MAFB,MAFF,MAP3K1,MCM6,MYORG,NGFR,NPTX1,OPTN,PAK1,PCNA,POLE,PPFIA4,PRKACA,PRKAR2B,RAC1,RAD9A,RELB,RELN,SESN1,SOD2,SOX9,STMN1,SUV39H2,SYP,TMEM64,TRIM47,TRPM4,TSPAN18,VPS4A,ABL1,ACTN1,ADCY9,AKT1S1,APC,CCND1,CHRNA7,CNR1,CPT1B,DRD2,EGF…
TF	Factor: Sp2; motif: NYSGCCCCGCCCCCY	TF:M03567	0.000383128	3.41666	7951	221	126	20044	ABCC8,ADRA2A,AKT2,APOE,ATG3,ATR,B3GNT5,BAG3,BMI1,BNIP3,BNIP3L,CABLES1,CASP2,CASP6,CD47,CD83,CLIC4,CLSTN1,COTL1,CRIP1,CSK,DAB2,DLG4,DNMT3A,DOT1L,DUSP7,EHMT2,EP300,EPCAM,FABP5,GRIN2B,GRM2,HDAC1,HPRT1,HSPB1,IFNAR2,IGF2R,IRAK2,KAT2A,KAT2B,KDM4D,KDM6A,KMT2C,LAMP2,LIG1,MAFB,MAFF,MAP3K1,MCM6,MRE11,MSN,MYORG,NFE2L2,NGFR,NPTX1,NTHL1,OPTN,PAK1,PCNA,PEX14,PIK3CA,PLXDC2,POLE,PPFIA4,PRKACA,PRKAR2A,PRKAR2B,PTM…
TF	Factor: ZNF138; motif: GCAGCRSCNSGSNCMGSGCS	TF:M13144	0.000389138	3.4099	9856	221	147	20044	ABCC8,ADRA2A,AGO4,AKT2,BAG3,BCL2,BECN1,BMI1,BNIP3,BNIP3L,CASP2,CD47,CDKN1A,CLIC4,CLSTN1,CNN2,COA5,COTL1,CRIP1,CYP7B1,DNMT3A,DOCK1,DOT1L,DUSP7,EHMT2,EP300,EPCAM,FABP5,GRIA2,GRIN2B,GRM2,GRM3,HPRT1,HSPB1,IFNAR2,IGF2R,JAM2,JUN,KAT2A,KAT2B,KDM5C,KDM6A,KMT2C,LACC1,LAMP1,LIG1,MAFB,MAFF,MAP3K1,MCM6,NFE2L2,NGFR,NLGN1,NPTX1,NQO1,NRP2,NTHL1,PAK1,PCNA,PIK3CA,PILRB,PLXDC2,POLE,PRKACA,PRKAR2A,PRKAR2B,PRKCQ,RAB…
TF	Factor: E2F-1; motif: WWTGGCGCCAAA; match class: 1	TF:M04515_1	0.000438442	3.35809	12531	221	174	20044	ABCC8,ADRA2A,AGO4,AKT2,APOE,ATG3,ATG5,ATR,B3GNT5,BAG3,BAG4,BCL2,BDNF,BMI1,BNIP3,BNIP3L,CASP2,CASP6,CD47,CD83,CLIC4,CLSTN1,CNN2,COTL1,COX5B,CRIP1,CSK,CYP7B1,DLG4,DNMT3A,DOCK1,DOT1L,DUSP7,EHMT2,EIF1,EP300,EPCAM,EPG5,FABP5,GRIA2,GRIN2B,GRM2,GRN,HDAC1,HPRT1,IFNAR2,IGF2R,IRAK2,JAM2,JUN,KAT2A,KAT2B,KDM4D,KDM5C,KDM6A,KMT2C,LAMP1,LAMP2,LGMN,MAFB,MAFF,MAP3K1,MCM6,MRE11,NCAPH,NGFR,NLGN1,NPTX1,NQO1,NRP2,PAK…
TF	Factor: Egr-1; motif: GCGGGGGCGG	TF:M07354	0.000463326	3.33411	8150	221	128	20044	ADRA2A,AGO4,AKT2,APOE,ATG3,B3GNT5,BAG3,BAG4,BCL2,BDNF,BMI1,BNIP3,BNIP3L,CABLES1,CASP2,CD47,CD83,CKS1B,CLIC4,CLSTN1,CNN2,COTL1,COX5B,DLG4,DNMT3A,DOCK1,DUSP7,EHMT2,EP300,EPCAM,GRIA2,GRM2,HDAC1,HPRT1,HSPB1,IFNAR2,IGF2R,JAM2,JUN,KAT2A,KAT2B,KDM4D,KMT2C,LACC1,LAMP1,LIG1,MAFF,MAP3K1,MCM6,MRE11,NFE2L2,NGFR,NPTX1,NRP2,OPTN,PAK1,PEX14,PIK3CA,PLXDC2,POLE,PRKACA,PRKAR2A,PRKAR2B,PROS1,PTMS,RAB6B,RAC1,RAD50,R…
TF	Factor: E2F-1:Elk-1; motif: SGCGCSNNAMCGGAAGT; match class: 1	TF:M08205_1	0.000496129	3.30441	10744	221	156	20044	ABCC8,ADRA2A,AGO4,APOE,ATG3,ATG5,ATR,B3GNT5,BAG4,BCL2,BDNF,BECN1,BMI1,BNIP3,BNIP3L,CASP2,CASP6,CD47,CD83,CD8A,CDKN1A,CKS1B,CLIC4,CLSTN1,CNN2,COA5,COTL1,COX5B,CRIP1,CYP7B1,DNMT3A,DOCK1,DOT1L,DUSP7,EHMT2,EIF1,EP300,EPCAM,EPG5,FABP5,GRIN2B,GRM2,GRM3,HPRT1,HSPB1,IFNAR2,JAM2,JUN,KAT2A,KAT2B,KDM5C,KDM6A,KMT2C,LACC1,LAMP1,LIG1,MAFB,MAFF,MAP3K1,MDM2,MYORG,NCAPH,NFE2L2,NGFR,NLGN1,NPTX1,NQO1,NTHL1,OPTN,PAK…
TF	Factor: ZF5; motif: GSGCGCGR	TF:M00716	0.000518692	3.28509	16490	221	208	20044	ABCC8,ADRA2A,AGO4,AKT2,APOE,ATG3,ATG5,ATR,B3GNT5,BAG3,BAG4,BCL2,BDNF,BECN1,BMI1,BNIP3,BNIP3L,CABLES1,CASP2,CASP6,CD47,CD83,CD8A,CDKN1A,CKS1B,CLIC4,CLSTN1,CNN2,COA5,COTL1,COX5B,CRIP1,CSK,CYP7B1,DAB2,DLG4,DNMT3A,DOCK1,DOT1L,DUSP7,EHMT2,EIF1,EP300,EPCAM,EPG5,FABP5,GRIA1,GRIA2,GRIN2B,GRM2,GRM3,GRN,HDAC1,HPRT1,HSPB1,IFNAR2,IGF2R,IRAK2,JAM2,JUN,KAT2A,KAT2B,KDM4D,KDM5C,KDM6A,KMT2C,LACC1,LAMP1,LAMP2,LGMN…
TF	Factor: AP-2gamma:Elk-1; motif: NGCCKNRGGSGRCGGAAGTG; match class: 1	TF:M08441_1	0.000530434	3.27537	13081	221	179	20044	ABCC8,ADRA2A,AGO4,AKT2,ATF3,ATG3,ATG5,ATR,B3GNT5,BAG3,BAG4,BCL2,BDNF,BECN1,BMI1,BNIP3,BNIP3L,CABLES1,CASP2,CASP6,CD47,CD83,CD8A,CDKN1A,CLIC4,CLSTN1,CNN2,COA5,COTL1,COX5B,CRIP1,CSK,CYP7B1,DAB2,DNMT3A,DOCK1,DOT1L,DUSP7,EHMT2,EIF1,EP300,EPCAM,EPG5,FABP5,GRIA2,GRIN2B,GRM2,GRM3,GRN,HPRT1,HSPB1,IGF2R,JAM2,JUN,KAT2B,KDM4D,KDM5C,KDM6A,KMT2C,LAMP1,LGMN,LIG1,MAFB,MAFF,MAP3K1,MCM6,MDM2,MSN,MYORG,NFE2L2,NGFR…
TF	Factor: Osx; motif: CCNCCCCCNNN	TF:M07329	0.000541517	3.26639	7044	221	115	20044	ABCC8,ADRA2A,AGO4,AKT2,APOE,ATG3,B3GNT5,BAG4,BCL2,BDNF,BMI1,BNIP3L,CABLES1,CD83,COTL1,COX5B,CRIP1,DLG4,DNMT3A,DOCK1,DOT1L,DUSP7,EHMT2,EP300,FABP5,GRIN2B,HDAC1,HPRT1,IFNAR2,JAM2,JUN,KAT2B,KDM4D,KDM6A,KMT2C,LAMP2,LGMN,LIG1,MAFF,MAP3K1,MCM6,MRE11,NGFR,NPTX1,NTHL1,OPTN,OSGIN1,PAK1,PEX14,PIK3CA,PPFIA4,PRKAR2A,PRKAR2B,PRKCQ,PTMS,RAC1,RAD51C,RAD9A,RALB,RELB,RELN,RHOA,RIPK2,SESN1,SIN3A,SOD2,SOX9,STMN1,SU…
TF	Factor: E2F-3:TBR2; motif: ANGTGYKANGGCGCSTTNNCRNNT; match class: 1	TF:M08207_1	0.000564171	3.24859	15845	221	203	20044	ABCC8,ADRA2A,AGO4,AKT2,APOE,ATG3,ATG5,ATR,B3GNT5,BAG3,BAG4,BCL2,BDNF,BECN1,BMI1,BNIP3,BNIP3L,CABLES1,CASP2,CASP6,CD47,CD83,CD8A,CDKN1A,CKS1B,CLIC4,CLSTN1,CNN2,COA5,COTL1,COX5B,CRIP1,CSK,DAB2,DLG4,DNMT3A,DOCK1,DOT1L,DUSP7,EHMT2,EIF1,EP300,EPCAM,EPG5,FABP5,GRIA1,GRIA2,GRIN2B,GRM2,GRN,GSN,HDAC1,HPRT1,HSPB1,IFNAR2,IGF2R,IRAK2,JAM2,JUN,KAT2A,KAT2B,KDM5C,KDM6A,KMT2C,LACC1,LAMP1,LAMP2,LIG1,MAFB,MAFF,MAP…
TF	Factor: GCMa:Erg; motif: ATGCGGGCGGAARKG	TF:M08487	0.000602542	3.22001	14303	221	190	20044	ABCC8,ADRA2A,AGO4,AKT2,APOE,ATG3,ATG5,ATR,B3GNT5,BAG3,BAG4,BCL2,BDNF,BECN1,BMI1,BNIP3,BNIP3L,CABLES1,CASP2,CASP6,CD47,CDKN1A,CKS1B,CLIC4,CLSTN1,CNN2,COX5B,CRIP1,CSK,CYP7B1,DAB2,DLG4,DNMT3A,DOCK1,DOT1L,DUSP7,EHMT2,EIF1,EP300,EPCAM,FABP5,GRIA2,GRIN2B,GRM2,GRM3,GRN,GSN,HDAC1,HPRT1,HSPB1,IFNAR2,IGF2R,JAM2,JUN,KAT2A,KAT2B,KDM4D,KDM5C,KDM6A,KMT2C,LACC1,LAMP1,LGMN,LIG1,MAFB,MAFF,MAP3K1,MCM6,MDM2,MRE11,M…
TF	Factor: HA95; motif: CCSNSSCCNSCNCCWSCCNS; match class: 1	TF:M13127_1	0.000619875	3.2077	8631	221	133	20044	ABCC8,ADRA2A,AGO4,AKT2,APOE,B3GNT5,BAG3,BCL2,BDNF,BMI1,BNIP3,BNIP3L,CABLES1,CASP6,CD47,CD83,CD8A,CLIC4,CLSTN1,CNN2,COTL1,CRIP1,DNMT3A,DOCK1,DOT1L,DUSP7,EHMT2,EP300,EPCAM,FABP5,GRIA2,GRM2,HDAC1,HPRT1,HSPB1,IFNAR2,IGF2R,IRAK2,JAM2,KAT2A,KAT2B,KDM6A,KMT2C,LIG1,MAFF,MAP3K1,MSN,NCAPH,NGFR,NPTX1,NTHL1,PAK1,PCNA,PEX14,PIK3CA,PILRB,POLE,PRKACA,PRKAR2B,PRKCQ,PTMS,RAB6B,RAC1,RAD9A,RALB,RELB,RELN,RHOA,RIPK1…
TF	Factor: HA95; motif: CCSNSSCCNSCNCCWSCCNS	TF:M13127	0.000648223	3.18828	12581	221	174	20044	ABCC8,ADRA2A,AGO4,AKT2,APOE,ATG5,B3GNT5,BAG3,BAG4,BCL2,BDNF,BMI1,BNIP3,BNIP3L,CABLES1,CASP2,CASP6,CD47,CD83,CD8A,CDKN1A,CKS1B,CLIC4,CLSTN1,CNN2,COTL1,COX5B,CRIP1,DNMT3A,DOCK1,DOT1L,DUSP7,EHMT2,EIF1,EP300,EPCAM,FABP5,GRIA1,GRIA2,GRIN2B,GRM2,GRM3,GRN,HDAC1,HPRT1,HSPB1,IFNAR2,IGF2R,IRAK2,JAM2,KAT2A,KAT2B,KDM6A,KMT2C,LACC1,LAMP1,LAMP2,LIG1,MAFB,MAFF,MAP3K1,MSN,NCAPH,NFE2L2,NGFR,NLGN1,NPTX1,NQO1,NTHL1…
TF	Factor: ZNF253; motif: SNGNSCGNGGNGCKGNN; match class: 1	TF:M13147_1	0.000695088	3.15796	6820	221	112	20044	ABCC8,ADRA2A,AGO4,AKT2,APOE,BAG3,BAG4,BCL2,BMI1,BNIP3,BNIP3L,CD47,CLIC4,CLSTN1,COTL1,CRIP1,DNMT3A,DOCK1,DOT1L,DUSP7,EHMT2,EP300,FABP5,GRIA2,GRM2,HSPB1,IFNAR2,IGF2R,JAM2,KAT2A,KAT2B,KDM4D,KDM6A,KMT2C,LACC1,LAMP1,LIG1,MAFB,MAFF,MAP3K1,MCM6,MDM2,MSN,NFE2L2,NGFR,NLGN1,NPTX1,NTHL1,OPTN,PIK3CA,PILRB,PLXDC2,POLE,PRKACA,PRKCQ,PROS1,PTMS,RAB6B,RAB7A,RAC1,RALB,RELB,RELN,RHOA,RPA1,SESN1,SETD1B,SLC44A1,SOD2,…
TF	Factor: Foxn2; motif: NNGCGTCNNNNNGACGCNN	TF:M11541	0.000697297	3.15658	5992	221	102	20044	ADRA2A,AGO4,ATG5,BAG4,BCL2,BMI1,BNIP3,BNIP3L,CASP2,CASP6,CD47,CD83,CDKN1A,CKS1B,CLSTN1,CNN2,COA5,COTL1,COX5B,CRIP1,CYP7B1,DOCK1,DUSP7,EIF1,EP300,GRIA2,GRM3,HSPB1,IFNAR2,KAT2B,KDM4D,KDM6A,KMT2C,LACC1,LAMP2,LIG1,MAFB,MAFF,MAP3K1,MCM6,MDM2,NFE2L2,NRP2,OPTN,PAK1,PCNA,PIK3CA,POLE,PRKACA,PRKAR2A,PRKCQ,RAB6B,RAB7A,RAD9A,RELB,RELN,RIPK1,SESN1,SETD1B,SIN3A,SMC1A,SOD2,SOX9,STMN1,SUV39H2,TARBP2,TMCC3,TNFRSF…
TF	Factor: E2F-1; motif: NGGGCGGGARV; match class: 1	TF:M07206_1	0.000731206	3.13596	11184	221	160	20044	ABCC8,ADRA2A,AGO4,AKT2,APOE,ATG3,ATR,B3GNT5,BAG3,BAG4,BCL2,BDNF,BMI1,BNIP3,BNIP3L,CABLES1,CASP2,CASP6,CD47,CD83,CKS1B,CLIC4,CLSTN1,CNN2,COA5,COTL1,COX5B,CRIP1,CYP7B1,DNMT3A,DOCK1,DOT1L,DUSP7,EHMT2,EIF1,EP300,EPCAM,GRIA2,GRIN2B,GRM2,GRM3,GRN,HDAC1,HPRT1,IGF2R,IRAK2,JAM2,JUN,KAT2A,KAT2B,KDM4D,KDM6A,KMT2C,LACC1,LAMP1,LIG1,MAFB,MAFF,MAP3K1,MCM6,MDM2,MSN,MYORG,NCAPH,NFE2L2,NGFR,NPTX1,NQO1,NTHL1,OPTN,P…
TF	Factor: KLF15; motif: RCCMCRCCCMCN; match class: 1	TF:M12160_1	0.000743662	3.12862	8297	221	129	20044	ABCC8,ADRA2A,AGO4,AKT2,APOE,B3GNT5,BAG3,BDNF,BECN1,BMI1,BNIP3,CABLES1,CASP2,CASP6,CD83,CKS1B,CLIC4,CNN2,COTL1,CRIP1,CSK,DLG4,DNMT3A,DOCK1,DOT1L,DUSP7,EHMT2,EIF1,EP300,FABP5,GRIA1,GRIN2B,GRM2,HDAC1,HPRT1,HSPB1,IGF2R,IRAK2,JAM2,JUN,KAT2A,KAT2B,KDM5C,KDM6A,KMT2C,LAMP2,LGMN,LIG1,MAFB,MAFF,MAP3K1,MDM2,MRE11,MSN,MYORG,NFE2L2,NGFR,NLGN1,NPTX1,PAK1,PCNA,PEX14,PIK3CA,POLE,PPFIA4,PRKACA,PRKAR2A,PRKAR2B,PTM…
TF	Factor: ZBP99; motif: GCCCMTCCCCCR	TF:M12057	0.000836419	3.07758	5368	221	94	20044	ABCC8,ADRA2A,AKT2,APOE,ATG3,B3GNT5,BAG3,BDNF,BMI1,CD83,CD8A,CLSTN1,CNN2,DLG4,DNMT3A,DOT1L,DUSP7,EHMT2,EPCAM,GRIA2,GRIN2B,GRM2,HDAC1,JUN,KAT2A,KAT2B,KDM6A,KMT2C,LAMP2,LGMN,LIG1,MEF2C,MYORG,NCAPH,NGFR,NPTX1,NQO1,OPTN,OSGIN1,PAK1,PEX14,PIK3CA,POLE,PPFIA4,PRKACA,PRKCQ,PROS1,RAB6B,RAB7A,RAC1,RHOA,RIPK2,RPA1,SESN1,SETD1B,SETDB1,SIN3A,SLC44A1,STMN1,SUV39H1,SUV39H2,SYP,TET1,TMEM64,TNFRSF10B,TRPM4,TSPAN18…
TF	Factor: E2F-3:T-bet; motif: AGGTGTNANGGCGCST	TF:M08529	0.000909697	3.0411	11708	221	165	20044	ABCC8,ADRA2A,AGO4,AKT2,APOE,ATG3,B3GNT5,BCL2,BDNF,BNIP3,CABLES1,CASP2,CD47,CD83,CD8A,CDKN1A,CKS1B,CLIC4,CLSTN1,COA5,COTL1,COX5B,CRIP1,CYP7B1,DAB2,DLG4,DOCK1,DUSP7,EHMT2,EIF1,EP300,EPCAM,EPG5,GRIA1,GRIA2,GRIN2B,GRM3,GRN,GSN,HDAC1,HPRT1,HSPB1,IGF2R,IRAK2,JAM2,KAT2B,KDM4D,KMT2C,LACC1,LAMP1,LAMP2,LGMN,LIG1,MAFB,MAFF,MAP3K1,MRE11,MSN,MYORG,NGFR,NPTX1,NQO1,NTHL1,OPTN,PAK1,PCNA,PEX14,PIK3CA,PILRB,PLXDC2…
TF	Factor: E2F-1; motif: NNNNGGCGGGAARN	TF:M09892	0.000972868	3.01195	13916	221	186	20044	ABCC8,ADRA2A,AGO4,AKT2,APOE,ATG3,ATR,B3GNT5,BAG3,BAG4,BCL2,BDNF,BMI1,BNIP3,BNIP3L,CABLES1,CASP2,CD47,CD83,CDKN1A,CKS1B,CLIC4,CLSTN1,CNN2,COA5,COTL1,COX5B,CRIP1,CYP7B1,DNMT3A,DOCK1,DOT1L,DUSP7,EHMT2,EIF1,EP300,EPCAM,EPG5,FABP5,GRIA2,GRIN2B,GRM2,GRM3,GRN,GSN,HDAC1,HPRT1,IFNAR2,IGF2R,IRAK2,JAM2,JUN,KAT2A,KAT2B,KDM4D,KDM5C,KDM6A,KMT2C,LACC1,LAMP1,LAMP2,LGMN,LIG1,MAFB,MAFF,MAP3K1,MCM6,MDM2,MRE11,MSN,M…
TF	Factor: SP2; motif: GNNGGGGGCGGGGSN	TF:M03807	0.000980494	3.00856	8689	221	133	20044	ABCC8,ADRA2A,AKT2,APOE,ATG3,ATR,B3GNT5,BAG3,BAG4,BMI1,BNIP3,BNIP3L,CABLES1,CASP2,CASP6,CD47,CD83,CDKN1A,CLIC4,CLSTN1,COTL1,CRIP1,CSK,DAB2,DLG4,DOT1L,DUSP7,EHMT2,EP300,EPCAM,FABP5,GRIN2B,GRM2,HDAC1,HPRT1,HSPB1,IFNAR2,IGF2R,IRAK2,KAT2A,KAT2B,KDM4D,KDM6A,KMT2C,LAMP2,LIG1,MAFB,MAFF,MAP3K1,MCM6,MRE11,MSN,MYORG,NFE2L2,NGFR,NPTX1,NTHL1,OPTN,PAK1,PCNA,PEX14,PIK3CA,PLXDC2,POLE,PPFIA4,PRKACA,PRKAR2A,PRKAR2…
TF	Factor: Sp3; motif: GGGGCGGGGSNN	TF:M07615	0.000988941	3.00483	7031	221	114	20044	ABCC8,ADRA2A,AKT2,APOE,ATG3,ATR,B3GNT5,BAG3,BMI1,BNIP3,BNIP3L,CABLES1,CASP2,CASP6,CD47,CD83,CLIC4,CLSTN1,COTL1,COX5B,DAB2,DLG4,DNMT3A,DOT1L,DUSP7,EHMT2,EP300,EPCAM,GRM2,HDAC1,HPRT1,HSPB1,IFNAR2,IGF2R,KAT2A,KAT2B,KDM4D,KMT2C,LAMP2,LIG1,MAFB,MAFF,MAP3K1,MCM6,MYORG,NFE2L2,NPTX1,OPTN,PAK1,PCNA,PEX14,PIK3CA,PLXDC2,POLE,PPFIA4,PRKACA,PRKAR2B,PTMS,RAB6B,RAC1,RAD50,RAD9A,RALB,RELB,RELN,RHOA,SESN1,SETDB1,…
TF	Factor: ZNF614; motif: NCYCWGCCYYNNN	TF:M09862	0.00108677	2.96386	9615	221	143	20044	ABCC8,ADRA2A,AKT2,APOE,ASB2,ATG3,ATG5,ATR,B3GNT5,BAG3,BDNF,BECN1,BMI1,BNIP3,BNIP3L,CABLES1,CASP6,CD83,CD8A,CDKN1A,CLSTN1,CNN2,COTL1,CRIP1,CSK,DAB2,DLG4,DNMT3A,DOCK1,DOT1L,DUSP7,EHMT2,EP300,EPCAM,GRIA1,GRIN2B,GRM2,GRM3,GRN,GSN,HDAC1,HSPB1,IFNAR2,IGF2R,JAM2,KAT2A,KAT2B,KDM6A,KMT2C,LACC1,LAMP2,LGMN,LIG1,MAFB,MAFF,MAP3K1,MCM6,MRE11,MSN,MYORG,NFE2L2,NGFR,NPTX1,NQO1,NTHL1,OPTN,PAK1,PEX14,PIK3CA,PILRB,P…
TF	Factor: KROX; motif: CCCGCCCCCRCCCC; match class: 1	TF:M00982_1	0.00120049	2.92064	3647	221	71	20044	AGO4,AKT2,APOE,B3GNT5,BDNF,BMI1,BNIP3,BNIP3L,CABLES1,CD83,CLIC4,COTL1,COX5B,DNMT3A,DOCK1,EHMT2,EP300,GRM2,HDAC1,HPRT1,HSPB1,IFNAR2,IGF2R,JAM2,JUN,KAT2B,KDM4D,KMT2C,LAMP1,LIG1,MAFF,MAP3K1,MCM6,NPTX1,PAK1,PIK3CA,POLE,PRKACA,PRKAR2B,PTMS,RAC1,RAD9A,RALB,RELB,RELN,RHOA,SETD1B,SOX9,SYP,TARBP2,TET1,TMCC3,TMEM64,VPS4A,ACTN1,ADCY9,ARHGEF10,CALB2,CCND1,CHRNA7,CNR1,EGFL7,HAP1,MAPKAPK2,MMP2,NKX6-2,PLEKHO2,P…
TF	Factor: Hey1; motif: NGCRCGYGYN	TF:M11058	0.00120118	2.92039	13615	221	183	20044	ABCC8,ADRA2A,AGO4,AKT2,ASB2,ATG3,ATG5,ATR,B3GNT5,BAG3,BAG4,BCL2,BDNF,BECN1,BMI1,BNIP3,BNIP3L,CABLES1,CASP2,CASP6,CD47,CD83,CD8A,CDKN1A,CKS1B,CLIC4,CLSTN1,CNN2,COA5,COTL1,COX5B,CRIP1,CYP7B1,DNMT3A,DOCK1,DOT1L,DUSP7,EHMT2,EIF1,EPCAM,EPG5,FABP5,GRIA1,GRIA2,GRIN2B,GRM2,GRM3,GRN,HDAC1,HPRT1,HSPB1,IFNAR2,IGF2R,IRAK2,JAM2,JUN,KAT2A,KAT2B,KDM6A,KMT2C,LACC1,LAMP1,LGMN,LIG1,MAFB,MAFF,MAP3K1,MCM6,MDM2,MRE11…
TF	Factor: WT1; motif: GNGGGGGCGGGG	TF:M03893	0.00128126	2.89236	8544	221	131	20044	ABCC8,ADRA2A,AGO4,AKT2,APOE,ATG3,ATR,B3GNT5,BAG3,BAG4,BCL2,BDNF,BECN1,BMI1,BNIP3,BNIP3L,CABLES1,CASP6,CD83,CD8A,CKS1B,CLIC4,CLSTN1,CNN2,COTL1,COX5B,DAB2,DNMT3A,DUSP7,EHMT2,EP300,GRIA2,GRM2,HDAC1,HPRT1,IFNAR2,IGF2R,JAM2,JUN,KAT2A,KAT2B,KDM4D,KMT2C,LACC1,LAMP1,LIG1,MAFB,MAFF,MAP3K1,MCM6,MRE11,MSN,MYORG,NFE2L2,NGFR,NLGN1,NPTX1,OPTN,PAK1,PCNA,PIK3CA,POLE,PPFIA4,PRKACA,PRKAR2A,PRKAR2B,PROS1,PTMS,RAB6B…
TF	Factor: Hey1; motif: NGCRCGYGYN; match class: 1	TF:M11058_1	0.00135901	2.86678	11364	221	161	20044	ABCC8,ADRA2A,AGO4,AKT2,ASB2,ATG3,ATG5,ATR,B3GNT5,BAG3,BAG4,BCL2,BDNF,BECN1,BMI1,BNIP3,BNIP3L,CABLES1,CASP2,CASP6,CD47,CD83,CD8A,CDKN1A,CKS1B,CLIC4,CLSTN1,CNN2,COA5,COTL1,COX5B,CYP7B1,DNMT3A,DOCK1,DOT1L,DUSP7,EHMT2,EIF1,EPCAM,FABP5,GRIA1,GRIA2,GRIN2B,GRM3,GRN,HPRT1,HSPB1,IFNAR2,IGF2R,JAM2,JUN,KAT2A,KAT2B,KDM6A,KMT2C,LACC1,LAMP1,LGMN,LIG1,MAFB,MAFF,MAP3K1,MCM6,MDM2,MRE11,MSN,NCAPH,NFE2L2,NPTX1,NTHL…
TF	Factor: MED8; motif: CYYNSCYYCCTSCNCC	TF:M13128	0.00140001	2.85387	13100	221	178	20044	ABCC8,ADRA2A,AGO4,AKT2,APOE,ASB2,ATG3,ATG5,ATR,BAG3,BAG4,BCL2,BDNF,BMI1,BNIP3,CABLES1,CASP2,CASP6,CD47,CD83,CD8A,CDKN1A,CLIC4,CLSTN1,CNN2,COA5,COTL1,COX5B,CRIP1,CSK,CYP7B1,DLG4,DNMT3A,DOCK1,DOT1L,DUSP7,EHMT2,EIF1,EP300,EPCAM,EPG5,FABP5,GRIA1,GRIA2,GRIN2B,GRM2,GRM3,GSN,HDAC1,HPRT1,HSPB1,IFNAR2,IGF2R,IRAK2,JAM2,KAT2A,KAT2B,KDM4D,KDM6A,KMT2C,LACC1,LAMP2,LIG1,MAFB,MAFF,MAP3K1,MCM6,MYORG,NFE2L2,NGFR,N…
TF	Factor: ZXDL; motif: GSGSCNNGGGMRGCNCCGGGS	TF:M12722	0.00141349	2.84971	10881	221	156	20044	ABCC8,ADRA2A,AGO4,AKT2,APOE,B3GNT5,BAG3,BAG4,BCL2,BDNF,BMI1,BNIP3,BNIP3L,CABLES1,CASP2,CASP6,CD47,CD83,CLIC4,CLSTN1,CNN2,COTL1,CRIP1,DLG4,DNMT3A,DOCK1,DOT1L,DUSP7,EHMT2,EIF1,EP300,EPCAM,FABP5,GRIN2B,GRM2,HDAC1,HPRT1,HSPB1,IFNAR2,IGF2R,JAM2,JUN,KAT2A,KAT2B,KDM6A,KMT2C,LACC1,LAMP1,LAMP2,LGMN,LIG1,MAFB,MAFF,MAP3K1,MCM6,MDM2,NCAPH,NFE2L2,NGFR,NLGN1,NPTX1,NRP2,NTHL1,OSGIN1,PAK1,PCNA,PIK3CA,PILRB,PLXDC…
TF	Factor: E2F-1; motif: NTTTCGCGCS	TF:M00940	0.00148317	2.82881	8031	221	125	20044	ABCC8,ADRA2A,AKT2,ATG3,ATG5,B3GNT5,BAG4,BDNF,BMI1,BNIP3,BNIP3L,CASP2,CASP6,CD47,CD83,CLIC4,COX5B,CRIP1,CYP7B1,DOCK1,DOT1L,EHMT2,EIF1,EP300,FABP5,GRIA2,GRM3,HPRT1,IGF2R,JAM2,JUN,KDM6A,KMT2C,LACC1,LIG1,MAFB,MCM6,MDM2,MSN,MYORG,NFE2L2,NPTX1,NRP2,NTHL1,PCNA,PEX14,PIK3CA,PLXDC2,POLE,PRDX1,PRKACA,PRKAR2A,PRKAR2B,PTMS,RAD50,RAD51B,RAD51C,RAD9A,RALB,RELB,RELN,RHOA,RIPK1,RIPK2,RPA1,S100A10,SETD1B,SETDB1,S…
TF	Factor: Kaiso; motif: GCMGGGRGCRGS	TF:M03876	0.00148554	2.82812	13970	221	186	20044	ADRA2A,AGO4,AKT2,APOE,ATG3,ATG5,B3GNT5,BAG3,BAG4,BCL2,BMI1,BNIP3,BNIP3L,CABLES1,CASP2,CASP6,CD47,CD83,CD8A,CLIC4,CLSTN1,CNN2,COTL1,COX5B,CRIP1,CYP7B1,DAB2,DLG4,DNMT3A,DOCK1,DOT1L,DUSP7,EHMT2,EIF1,EP300,EPCAM,EPG5,FABP5,GRIA2,GRIN2B,GRM2,GRM3,HDAC1,HPRT1,HSPB1,IFNAR2,IGF2R,IRAK2,JAM2,JUN,KAT2A,KAT2B,KDM5C,KDM6A,KMT2C,LACC1,LAMP1,LGMN,LIG1,MAFB,MAFF,MAP3K1,MCM6,MDM2,MRE11,MSN,MYORG,NCAPH,NFE2L2,NGF…
TF	Factor: MED8; motif: CYYNSCYYCCTSCNCC; match class: 1	TF:M13128_1	0.00157934	2.80152	8039	221	125	20044	ABCC8,ADRA2A,AGO4,AKT2,APOE,ATR,BAG3,BAG4,BCL2,BDNF,BMI1,BNIP3,CASP2,CASP6,CD47,CD83,CD8A,CDKN1A,CLSTN1,CNN2,COTL1,COX5B,CRIP1,CSK,DLG4,DNMT3A,DOT1L,DUSP7,EHMT2,EIF1,EP300,FABP5,GRIA1,GRIA2,GRIN2B,GRM2,GRM3,HDAC1,HPRT1,HSPB1,IFNAR2,IRAK2,JAM2,KAT2A,KAT2B,KMT2C,LACC1,LIG1,MAFB,MAFF,MAP3K1,MYORG,NFE2L2,NGFR,NLGN1,NPTX1,NQO1,NTHL1,OPTN,PAK1,PIK3CA,PILRB,PLXDC2,POLE,PPFIA4,PRKACA,PRKAR2B,PTMS,RAB6B,R…
TF	Factor: WT1; motif: SMCNCCNSC; match class: 1	TF:M01118_1	0.0016018	2.79539	2886	221	60	20044	AKT2,BAG3,BCL2,BDNF,BECN1,BMI1,CLSTN1,CNN2,COTL1,DLG4,DNMT3A,DOT1L,DUSP7,EHMT2,EPCAM,HDAC1,JUN,KAT2A,KAT2B,KDM4D,KMT2C,LIG1,MYORG,NGFR,NPTX1,PAK1,PEX14,POLE,PRKACA,RAD51C,RELN,RHOA,RIPK2,SETD1B,SOD2,STMN1,TET1,TNFRSF10B,TSPAN18,ADCYAP1,APC,ARHGEF10,CACNA1C,CAMK4,CCND1,COL4A2,DRD2,GABRG2,GAD1,HAP1,HDAC7,ITGA7,ITPR1,MAPKAPK2,MMP2,NKX6-2,NR4A2,POLR2J,RYR1,SLC12A5
TF	Factor: PLAG1; motif: CCCCCKWNNNGGSCCC	TF:M01973	0.00164926	2.78271	6338	221	105	20044	AGO4,APOE,ATR,B3GNT5,BCL2,BMI1,BNIP3,BNIP3L,CASP6,CD83,CD8A,CDKN1A,CLSTN1,CNN2,COA5,COTL1,CRIP1,DLG4,DNMT3A,DUSP7,EHMT2,EP300,GRIA2,GRIN2B,GRM2,HPRT1,HSPB1,IFNAR2,IGF2R,KAT2A,KAT2B,KDM5C,KMT2C,LACC1,LAMP2,LIG1,MAFF,MEF2C,MSN,NFE2L2,NLGN1,PEX14,PIK3CA,POLE,PPFIA4,PRKACA,PRKAR2B,PRKCQ,PTMS,RAB6B,RAB7A,RAD51C,RALB,RELN,RIPK1,RIPK2,RPL28,S100A10,SETD1B,SMC1A,SOD2,SOX9,SUV39H1,SYP,TMEM64,TNFRSF10B,TNF…
TF	Factor: ZF5; motif: GGSGCGCGS	TF:M10438	0.00169566	2.77066	16621	221	208	20044	ABCC8,ADRA2A,AGO4,AKT2,APOE,ATG3,ATG5,ATR,B3GNT5,BAG3,BAG4,BCL2,BDNF,BECN1,BMI1,BNIP3,BNIP3L,CABLES1,CASP2,CASP6,CD47,CD83,CD8A,CDKN1A,CKS1B,CLIC4,CLSTN1,CNN2,COA5,COTL1,COX5B,CRIP1,CYP7B1,DAB2,DLG4,DNMT3A,DOCK1,DOT1L,DUSP7,EHMT2,EIF1,EP300,EPCAM,EPG5,FABP5,GRIA1,GRIA2,GRIN2B,GRM2,GRM3,GRN,HDAC1,HPRT1,HSPB1,IFNAR2,IGF2R,IRAK2,JAM2,JUN,KAT2A,KAT2B,KDM4D,KDM5C,KDM6A,KMT2C,LACC1,LAMP1,LAMP2,LGMN,LIG…
TF	Factor: KLF3; motif: NNNNNNGGGCGGGGCNNGN	TF:M09970	0.00171835	2.76489	7962	221	124	20044	ABCC8,ADRA2A,AKT2,APOE,ATG3,ATR,B3GNT5,BAG3,BAG4,BMI1,BNIP3,BNIP3L,CABLES1,CASP2,CASP6,CD47,CD83,CDKN1A,CLIC4,CLSTN1,COTL1,CRIP1,CSK,DAB2,DOT1L,DUSP7,EHMT2,EP300,EPCAM,FABP5,GRM2,HDAC1,HPRT1,HSPB1,IFNAR2,IGF2R,IRAK2,KAT2A,KAT2B,KDM4D,KDM6A,KMT2C,LAMP2,LIG1,MAFB,MAFF,MAP3K1,MCM6,MRE11,MSN,MYORG,NFE2L2,NGFR,NPTX1,NRP2,NTHL1,OPTN,PAK1,PCNA,PEX14,PLXDC2,POLE,PPFIA4,PRKACA,PRKAR2A,PRKAR2B,PTMS,RAB6B,R…
TF	Factor: IRX-1; motif: NACRYNNNNNNNNRYGNN	TF:M11018	0.00175086	2.75675	17328	221	213	20044	ABCC8,ADRA2A,AGO4,AKT2,APOE,ASB2,ATG3,ATG5,ATR,B3GNT5,BAG3,BAG4,BCL2,BDNF,BECN1,BMI1,BNIP3,BNIP3L,CABLES1,CASP2,CASP6,CD47,CD83,CD8A,CDKN1A,CKS1B,CLIC4,CLSTN1,CNN2,COA5,COTL1,COX5B,CRIP1,CSK,CYP7B1,DAB2,DOCK1,DOT1L,DUSP7,EHMT2,EIF1,EP300,EPCAM,EPG5,FABP5,GRIA1,GRIA2,GRIN2B,GRM2,GRM3,GRN,HDAC1,HPRT1,HSPB1,IFNAR2,IGF2R,IRAK2,JAM2,JUN,KAT2A,KAT2B,KDM4D,KDM5C,KDM6A,KMT2C,LACC1,LAMP1,LAMP2,LGMN,LIG1,M…
TF	Factor: Egr-1; motif: GCGGGGGCGG	TF:M01873	0.00179398	2.74618	6934	221	112	20044	ADRA2A,AKT2,APOE,ATG3,B3GNT5,BAG3,BAG4,BCL2,BDNF,BMI1,BNIP3,BNIP3L,CABLES1,CASP2,CD47,CD83,CLIC4,CNN2,COTL1,COX5B,DOCK1,DUSP7,EHMT2,EP300,EPCAM,HDAC1,HPRT1,IFNAR2,IGF2R,JAM2,JUN,KAT2A,KAT2B,KDM4D,KMT2C,LACC1,LAMP1,LIG1,MAFF,MAP3K1,MCM6,MRE11,MSN,NFE2L2,NGFR,NPTX1,NRP2,OPTN,PAK1,PIK3CA,PLXDC2,POLE,PRKACA,PRKAR2A,PRKAR2B,PTMS,RAB6B,RAC1,RAD50,RAD51C,RAD9A,RALB,RELB,RELN,RHOA,RIPK1,SESN1,SIN3A,SOD2,…
TF	Factor: KLF3; motif: NNNNNNGGGCGGGGCNNGN; match class: 1	TF:M09970_1	0.00179857	2.74507	3907	221	74	20044	ABCC8,AKT2,B3GNT5,BAG3,BNIP3,BNIP3L,CABLES1,CASP6,CD83,CLIC4,CLSTN1,DOT1L,DUSP7,EHMT2,EP300,FABP5,GRM2,HDAC1,HPRT1,HSPB1,IFNAR2,IGF2R,KAT2A,KAT2B,KMT2C,LIG1,MAFF,MAP3K1,MCM6,MYORG,NTHL1,OPTN,PAK1,PCNA,POLE,PRKACA,PRKAR2A,PRKAR2B,PTMS,RAC1,RALB,RELB,RELN,RHOA,SESN1,SOD2,SOX9,STMN1,SUV39H2,SYP,TMEM64,TRIM47,TSPAN18,VPS4A,ABL1,ACTN1,ADCY9,AKT1S1,CCND1,CHRNA7,CPT1B,DRD2,EGFL7,HDAC7,ITGA7,MAPKAPK2,NES…
TF	Factor: SP2; motif: GGGCGGGAC	TF:M01783	0.00180872	2.74263	9405	221	140	20044	ABCC8,ADRA2A,AGO4,AKT2,APOE,ATG3,ATR,B3GNT5,BAG3,BAG4,BCL2,BNIP3,BNIP3L,CASP2,CASP6,CD47,CDKN1A,CKS1B,CLIC4,CLSTN1,CNN2,COA5,COTL1,COX5B,CRIP1,CSK,DNMT3A,DOCK1,DOT1L,DUSP7,EHMT2,EP300,EPCAM,EPG5,FABP5,GRIN2B,GRM2,GRN,HDAC1,HPRT1,HSPB1,IFNAR2,IGF2R,IRAK2,KAT2A,KDM4D,KDM6A,KMT2C,LAMP1,LAMP2,LGMN,LIG1,MAFB,MAFF,MAP3K1,MCM6,MRE11,MSN,MYORG,NGFR,NPTX1,NQO1,NRP2,NTHL1,OPTN,PAK1,PCNA,PEX14,PILRB,PLXDC2,…
TF	Factor: RERE; motif: CNGCNSCNNGSRCRGSGSS	TF:M13129	0.00192816	2.71486	10538	221	152	20044	ABCC8,ADRA2A,AGO4,AKT2,APOE,BAG3,BAG4,BCL2,BECN1,BMI1,BNIP3,BNIP3L,CASP2,CASP6,CD47,CD83,CD8A,CLIC4,CLSTN1,CNN2,COA5,COTL1,COX5B,CRIP1,CSK,DNMT3A,DOCK1,DOT1L,DUSP7,EHMT2,EP300,EPCAM,FABP5,GRIA2,GRIN2B,GRM2,GRM3,GRN,HDAC1,HPRT1,HSPB1,IFNAR2,IGF2R,IRAK2,JAM2,JUN,KAT2A,KAT2B,KDM4D,KDM5C,KDM6A,KMT2C,LAMP1,LGMN,LIG1,MAFF,MAP3K1,MCM6,NCAPH,NGFR,NLGN1,NPTX1,NQO1,NRP2,NTHL1,OPTN,PAK1,PCNA,PEX14,PIK3CA,PI…
TF	Factor: Sp1; motif: GGNDGGRGGCGGGG; match class: 1	TF:M04953_1	0.00194384	2.71134	4215	221	78	20044	ADRA2A,AKT2,APOE,BAG3,BCL2,BDNF,BECN1,BMI1,CABLES1,CASP6,CD83,CLSTN1,COTL1,DLG4,DNMT3A,DUSP7,EHMT2,EP300,EPCAM,GRIN2B,GRM2,HDAC1,HPRT1,IFNAR2,IGF2R,KAT2A,KAT2B,KMT2C,LIG1,MAFB,MAFF,MAP3K1,NFE2L2,NGFR,NLGN1,NPTX1,PAK1,PIK3CA,POLE,PRKACA,RAD50,RALB,RELB,RPA1,SETDB1,SLC44A1,SMC1A,SOD2,SOX9,STMN1,SUV39H2,TMEM64,TSPAN18,ACTN1,ADCYAP1,AKT1S1,APC,CCND1,CHRNA7,DRD2,EGFL7,EPHA6,FGF2,GAD1,HDAC7,ITGA7,MAPKA…
TF	Factor: E2F-3:HES-7; motif: NNNSGCGCSNNNNNCRCGYGNN; match class: 1	TF:M08526_1	0.00209447	2.67893	15386	221	198	20044	ABCC8,ADRA2A,AGO4,AKT2,ATG3,ATG5,ATR,B3GNT5,BAG3,BAG4,BCL2,BDNF,BECN1,BMI1,BNIP3,BNIP3L,CABLES1,CASP2,CASP6,CD47,CD83,CD8A,CDKN1A,CLIC4,CLSTN1,CNN2,COA5,COTL1,COX5B,CRIP1,CYP7B1,DAB2,DNMT3A,DOCK1,DOT1L,DUSP7,EHMT2,EIF1,EP300,EPCAM,EPG5,FABP5,GRIA1,GRIA2,GRIN2B,GRM2,GRM3,GRN,HDAC1,HPRT1,HSPB1,IFNAR2,IGF2R,IRAK2,JAM2,JUN,KAT2A,KAT2B,KDM4D,KDM6A,KMT2C,LACC1,LAMP1,LAMP2,LGMN,LIG1,MAFB,MAFF,MAP3K1,MCM…
TF	Factor: AP-2alpha; motif: NGCCYSNNGSN	TF:M01857	0.00226595	2.64475	9435	221	140	20044	ADRA2A,AGO4,AKT2,APOE,B3GNT5,BAG3,BAG4,BCL2,BMI1,BNIP3,BNIP3L,CASP6,CD83,CD8A,CDKN1A,CKS1B,CLIC4,CLSTN1,CNN2,COA5,COTL1,COX5B,CRIP1,DAB2,DNMT3A,DOCK1,DOT1L,DUSP7,EHMT2,EP300,EPCAM,GRIN2B,GRM2,GRM3,HDAC1,HPRT1,HSPB1,IFNAR2,IGF2R,IRAK2,JAM2,KAT2A,KAT2B,KDM4D,KDM6A,KMT2C,LAMP1,LAMP2,LIG1,MAFB,MAFF,MAP3K1,MCM6,MDM2,MYORG,NCAPH,NGFR,NPTX1,NRP2,OPTN,PCNA,PILRB,PLXDC2,POLE,PRKAR2B,PRKCQ,PROS1,PTMS,RAB7A…
TF	Factor: Sp1; motif: GGGGCGGGGC	TF:M07063	0.0024801	2.60553	6470	221	106	20044	ABCC8,ADRA2A,AKT2,APOE,ATG3,ATR,B3GNT5,BAG3,BNIP3,BNIP3L,CABLES1,CASP2,CASP6,CD47,CD83,CLIC4,CLSTN1,COTL1,DAB2,DLG4,DOT1L,DUSP7,EHMT2,EP300,EPCAM,GRM2,HDAC1,HPRT1,HSPB1,IFNAR2,IGF2R,KAT2A,KDM4D,KMT2C,LAMP2,LIG1,MAFB,MAFF,MAP3K1,MCM6,MYORG,NFE2L2,NPTX1,OPTN,PAK1,PCNA,PEX14,PIK3CA,PLXDC2,POLE,PPFIA4,PRKACA,PRKAR2B,PTMS,RAC1,RAD50,RAD9A,RALB,RELB,RELN,RHOA,SESN1,SETDB1,SIN3A,SMC1A,SOD2,SOX9,STMN1,SU…
TF	Factor: E2F-1:Elk-1; motif: SGCGCSNNAMCGGAAGT	TF:M08205	0.00252142	2.59835	14824	221	193	20044	ABCC8,ADRA2A,AGO4,AKT2,APOE,ASB2,ATF3,ATG3,ATG5,ATR,B3GNT5,BAG3,BAG4,BCL2,BDNF,BECN1,BMI1,BNIP3,BNIP3L,CABLES1,CASP2,CASP6,CD47,CD83,CD8A,CDKN1A,CKS1B,CLIC4,CLSTN1,CNN2,COA5,COTL1,COX5B,CRIP1,CYP7B1,DNMT3A,DOCK1,DOT1L,DUSP7,EHMT2,EIF1,EP300,EPCAM,EPG5,FABP5,GRIN2B,GRM2,GRM3,GRN,HDAC1,HPRT1,HSPB1,IFNAR2,IGF2R,IRAK2,JAM2,JUN,KAT2A,KAT2B,KDM4D,KDM5C,KDM6A,KMT2C,LACC1,LAMP1,LAMP2,LGMN,LIG1,MAFB,MAFF,…
TF	Factor: pax-6; motif: NYACGCNYSANYGMNCN; match class: 1	TF:M11882_1	0.00255235	2.59306	11746	221	164	20044	ABCC8,ADRA2A,AGO4,AKT2,ATG5,ATR,B3GNT5,BAG3,BAG4,BCL2,BDNF,BECN1,BMI1,BNIP3,CABLES1,CASP2,CD47,CD83,CD8A,CDKN1A,CKS1B,CLIC4,CLSTN1,CNN2,COA5,COX5B,CRIP1,CYP7B1,DAB2,DOCK1,DOT1L,DUSP7,EHMT2,EP300,EPCAM,EPG5,FABP5,GRIA2,GRM2,HPRT1,HSPB1,IGF2R,JAM2,JUN,KAT2A,KAT2B,KDM4D,KDM5C,KDM6A,KMT2C,LACC1,LAMP1,LAMP2,LGMN,LIG1,MAFB,MAFF,MAP3K1,MCM6,MDM2,MYORG,NCAPH,NFE2L2,NGFR,NLGN1,NPTX1,NQO1,NRP2,NTHL1,OPTN,P…
TF	Factor: E2F-3:HES-7; motif: NNNSGCGCSNNNNNCRCGYGNN	TF:M08526	0.0026352	2.57919	17225	221	212	20044	ABCC8,ADRA2A,AGO4,AKT2,APOE,ATG3,ATG5,ATR,B3GNT5,BAG3,BAG4,BCL2,BDNF,BECN1,BMI1,BNIP3,BNIP3L,CABLES1,CASP2,CASP6,CD47,CD83,CD8A,CDKN1A,CKS1B,CLIC4,CLSTN1,CNN2,COA5,COTL1,COX5B,CRIP1,CSK,CYP7B1,DAB2,DNMT3A,DOCK1,DOT1L,DUSP7,EHMT2,EIF1,EP300,EPCAM,EPG5,FABP5,GRIA1,GRIA2,GRIN2B,GRM2,GRM3,GRN,GSN,HDAC1,HPRT1,HSPB1,IFNAR2,IGF2R,IRAK2,JAM2,JUN,KAT2A,KAT2B,KDM4D,KDM5C,KDM6A,KMT2C,LACC1,LAMP1,LAMP2,LGMN,…
TF	Factor: ZNF609; motif: GNSNGGGNGCTGN	TF:M13132	0.00265625	2.57573	11356	221	160	20044	ABCC8,ADRA2A,AKT2,APOE,ASB2,ATF3,ATG3,ATG5,ATR,B3GNT5,BAG3,BAG4,BCL2,BMI1,BNIP3,CABLES1,CASP2,CD47,CD8A,CDKN1A,CKS1B,CLIC4,CLSTN1,CNN2,COTL1,COX5B,CRIP1,CSK,DLG4,DNMT3A,DOCK1,DOT1L,DUSP7,EHMT2,EIF1,EP300,EPCAM,EPG5,FABP5,GRIA1,GRIA2,GRIN2B,GRM2,GRM3,GRN,HDAC1,HSPB1,IFNAR2,IRAK2,JAM2,JUN,KAT2A,KAT2B,KDM5C,KDM6A,LAMP1,LGMN,MAFB,MAFF,MCM6,MDM2,MSN,MYORG,NFE2L2,NGFR,NLGN1,NPTX1,NQO1,NTHL1,OPTN,OSGIN1…
TF	Factor: Sp4; motif: SCCCCKCCCCCSN	TF:M07617	0.00267018	2.57346	3723	221	71	20044	ABCC8,AKT2,ATG3,ATR,B3GNT5,BAG3,BDNF,CASP6,CLIC4,CNN2,COTL1,DAB2,DUSP7,EHMT2,EP300,GRIA2,GRM2,HDAC1,HPRT1,IFNAR2,IGF2R,KAT2A,KMT2C,LIG1,MAFB,MAFF,MAP3K1,MCM6,MYORG,NFE2L2,NGFR,NPTX1,PCNA,PEX14,PIK3CA,POLE,PPFIA4,PRKACA,PRKAR2B,RAD50,RAD9A,RALB,RELB,RELN,SESN1,SETD1B,SETDB1,SOD2,SOX9,STMN1,TMEM64,VPS4A,ABL1,ACTN1,AKT1S1,AMIGO1,APC,CACNA1C,CHRNA7,DRD2,EGFL7,FGF2,GABRG2,MAPKAPK2,NR4A2,PLEKHO2,POLR2J…
TF	Factor: CKROX; motif: SCCCTCCCC	TF:M01175	0.00285413	2.54453	7505	221	118	20044	ADRA2A,AKT2,APOE,ATG5,ATR,BAG3,BAG4,BCL2,BDNF,BMI1,CASP2,CD47,CD83,CD8A,CDKN1A,CLSTN1,CNN2,COTL1,COX5B,CRIP1,CYP7B1,DLG4,DNMT3A,DOT1L,DUSP7,EHMT2,EPCAM,GRIA1,GRIA2,GRIN2B,GRM2,GRM3,HDAC1,HPRT1,HSPB1,IRAK2,JAM2,JUN,KAT2A,KAT2B,KDM5C,KDM6A,KMT2C,LAMP2,LIG1,MAFB,MAP3K1,MEF2C,MRE11,MYORG,NCAPH,NFE2L2,NGFR,NPTX1,NQO1,PAK1,PEX14,PILRB,PLXDC2,POLE,PPFIA4,PRKACA,PRKAR2B,PRKCQ,PTMS,RAB6B,RAC1,RIPK1,RIPK2,…
TF	Factor: Egr-1; motif: GCGCATGCG	TF:M04869	0.00296423	2.52809	11568	221	162	20044	ABCC8,ADRA2A,AGO4,AKT2,ATG3,ATG5,BAG3,BAG4,BCL2,BDNF,BMI1,BNIP3,BNIP3L,CABLES1,CASP2,CASP6,CD47,CD83,CD8A,CDKN1A,CKS1B,CLIC4,CLSTN1,CNN2,COA5,COX5B,CRIP1,CSK,CYP7B1,DAB2,DNMT3A,DOCK1,DOT1L,DUSP7,EHMT2,EIF1,EP300,EPCAM,FABP5,GRIA2,GRIN2B,GRM2,GRN,HDAC1,HPRT1,HSPB1,IFNAR2,IGF2R,JAM2,JUN,KAT2A,KAT2B,KDM4D,KDM5C,KDM6A,KMT2C,LACC1,LAMP1,LAMP2,LGMN,MAFB,MAFF,MAP3K1,MCM6,MDM2,MRE11,MYORG,NCAPH,NFE2L2,NG…
TF	Factor: ZNF341; motif: GRGGRRNRGNRGNRGGAASAGC	TF:M10144	0.00299654	2.52338	4412	221	80	20044	ADRA2A,AGO4,AKT2,APOE,ASB2,ATG5,BAG3,BAG4,BDNF,BECN1,BNIP3L,CD47,CDKN1A,CLIC4,CLSTN1,COTL1,COX5B,DNMT3A,EHMT2,GRIA1,GRIN2B,GRM3,HDAC1,JAM2,JUN,KDM6A,LIG1,MAFB,MAP3K1,NCAPH,NRP2,NTHL1,OSGIN1,PAK1,PIK3CA,PLXDC2,POLE,PRKAR2B,PRKCQ,PTMS,RAB6B,RAD51C,RIPK1,RPL28,S100A10,SETD1B,SLC44A1,ST3GAL6,STMN1,SYP,TET1,TNFRSF1A,TPD52,ABL1,ADCY9,ADCYAP1,AKT1S1,AMIGO1,ARHGEF10,CACNA1C,CAMK4,CNR1,CRTC2,DBH,DRD2,HDAC…
TF	Factor: SP1; motif: NRGKGGGCGGGGCN; match class: 1	TF:M09765_1	0.0031011	2.50848	3444	221	67	20044	ABCC8,B3GNT5,BAG3,BNIP3,BNIP3L,CABLES1,CASP6,CD83,CRIP1,DNMT3A,DOT1L,DUSP7,EHMT2,EP300,GRM2,HPRT1,IFNAR2,IGF2R,KAT2A,KMT2C,LAMP2,LIG1,MAFF,MAP3K1,MRE11,MYORG,NPTX1,OPTN,PAK1,PCNA,PEX14,POLE,PPFIA4,PRKACA,RAD9A,RELB,RELN,SESN1,SIN3A,SOD2,SOX9,STMN1,SUV39H2,SYP,TMEM64,TSPAN18,VPS4A,ABL1,ACTN1,ADCY9,AKT1S1,CCND1,CHRNA7,DRD2,EGFL7,EPHA6,ITGA7,MAPKAPK2,PLEKHO2,POLR2J,PPP3CA,PRKAA2,PRKCG,PRKN,RYR2,SLC1…
TF	Factor: IRX-1; motif: NACRYNNNNNNNNRYGNN; match class: 1	TF:M11018_1	0.00328809	2.48306	16304	221	205	20044	ABCC8,ADRA2A,AGO4,AKT2,APOE,ASB2,ATG3,ATG5,ATR,B3GNT5,BAG3,BAG4,BCL2,BDNF,BECN1,BMI1,BNIP3,BNIP3L,CABLES1,CASP2,CASP6,CD47,CD83,CD8A,CDKN1A,CKS1B,CLIC4,CLSTN1,CNN2,COA5,COTL1,COX5B,CRIP1,CSK,CYP7B1,DAB2,DOCK1,DOT1L,DUSP7,EHMT2,EIF1,EP300,EPCAM,EPG5,FABP5,GRIA2,GRIN2B,GRM2,GRN,HDAC1,HPRT1,HSPB1,IFNAR2,IGF2R,IRAK2,JAM2,JUN,KAT2A,KAT2B,KDM4D,KDM5C,KDM6A,KMT2C,LACC1,LAMP1,LAMP2,LGMN,LIG1,MAFB,MAFF,MA…
TF	Factor: Foxn2; motif: NNGCGTCNNNNNGACGCNN; match class: 1	TF:M11541_1	0.00340528	2.46785	5687	221	96	20044	ADRA2A,AGO4,BAG4,BCL2,BMI1,BNIP3,BNIP3L,CASP2,CASP6,CD47,CD83,CDKN1A,CKS1B,CLSTN1,CNN2,COA5,COTL1,COX5B,CRIP1,CYP7B1,DOCK1,DUSP7,EIF1,EP300,GRIA2,GRM3,HSPB1,IFNAR2,KAT2B,KDM4D,KDM6A,KMT2C,LACC1,LAMP2,LIG1,MAFB,MAFF,MAP3K1,MCM6,MDM2,NFE2L2,NRP2,OPTN,PAK1,PCNA,PIK3CA,POLE,PRKACA,PRKAR2A,RAB6B,RAB7A,RELB,RELN,RIPK1,SESN1,SETD1B,SIN3A,SMC1A,SOD2,SOX9,STMN1,SUV39H2,TARBP2,TMCC3,TRIM47,TRPM4,TSPAN18,VP…
TF	Factor: BTEB2; motif: RGGGNGKGGN	TF:M07277	0.00340863	2.46742	8762	221	132	20044	ABCC8,ADRA2A,AKT2,APOE,ATG3,ATG5,ATR,B3GNT5,BAG3,BAG4,BDNF,BNIP3,BNIP3L,CABLES1,CASP2,CASP6,CD47,CD83,CDKN1A,CLIC4,CLSTN1,CNN2,COTL1,CRIP1,CSK,DAB2,DLG4,DNMT3A,DOT1L,DUSP7,EHMT2,EP300,EPCAM,FABP5,GRM2,HDAC1,HPRT1,HSPB1,IFNAR2,IGF2R,KAT2A,KAT2B,KDM4D,KMT2C,LACC1,LAMP2,LIG1,MAFB,MAFF,MAP3K1,MCM6,MRE11,MYORG,NFE2L2,NGFR,NPTX1,OPTN,PAK1,PCNA,PEX14,PIK3CA,PILRB,PLXDC2,POLE,PPFIA4,PRKACA,PRKAR2B,PTMS,R…
TF	Factor: DB1; motif: GGRRRRGRRGGAGGGGGNGRRR	TF:M10107	0.00344202	2.46319	6014	221	100	20044	ABCC8,AGO4,AKT2,APOE,BAG3,BAG4,BCL2,BDNF,BMI1,BNIP3L,CASP2,CD47,CD83,COTL1,CRIP1,DLG4,DNMT3A,DOCK1,DOT1L,DUSP7,EHMT2,EIF1,EPCAM,FABP5,GRIN2B,GRM2,GRM3,IFNAR2,JAM2,KAT2A,KAT2B,KMT2C,LACC1,LIG1,MAFF,MAP3K1,MEF2C,MRE11,NPTX1,NTHL1,OPTN,PAK1,PILRB,PLXDC2,POLE,PRKACA,PRKAR2B,PRKCQ,PTMS,RAB6B,RALB,RELB,RIPK1,SETD1B,SETDB1,SLC44A1,SOX9,STMN1,SUV39H1,SUV39H2,SYP,TARBP2,TET1,TMCC3,TNFRSF10B,TNFRSF1A,TRPM4…
TF	Factor: E2F-2; motif: NWTTTGGCGCCAWWNN	TF:M11530	0.00345249	2.46187	14979	221	194	20044	ABCC8,ADRA2A,AGO4,AKT2,APOE,ATG3,ATG5,ATR,B3GNT5,BAG3,BAG4,BCL2,BDNF,BMI1,BNIP3,BNIP3L,CASP2,CASP6,CD47,CD83,CD8A,CDKN1A,CKS1B,CLIC4,CLSTN1,CNN2,COA5,COTL1,COX5B,CRIP1,CSK,CYP7B1,DAB2,DLG4,DNMT3A,DOCK1,DOT1L,DUSP7,EHMT2,EIF1,EP300,EPCAM,EPG5,FABP5,GRIA1,GRIA2,GRIN2B,GRM2,GRN,HDAC1,HPRT1,HSPB1,IGF2R,IRAK2,JAM2,JUN,KAT2A,KAT2B,KDM4D,KDM5C,KDM6A,KMT2C,LAMP1,LAMP2,LGMN,LIG1,MAFB,MAFF,MAP3K1,MCM6,MRE1…
TF	Factor: ZNF219; motif: SNNCAGCACCNNGGNCAGCGSC	TF:M13149	0.00363348	2.43968	11695	221	163	20044	ABCC8,ADRA2A,AGO4,AKT2,APOE,ATG5,BAG3,BAG4,BCL2,BMI1,BNIP3,BNIP3L,CASP2,CASP6,CD47,CD8A,CDKN1A,CKS1B,CLIC4,CLSTN1,CNN2,COA5,COTL1,COX5B,CRIP1,CSK,CYP7B1,DOCK1,DOT1L,DUSP7,EHMT2,EP300,EPCAM,EPG5,FABP5,GRIA2,GRIN2B,GRM2,GRM3,GRN,HPRT1,HSPB1,IFNAR2,IGF2R,IRAK2,JAM2,JUN,KAT2A,KAT2B,KDM4D,KDM5C,KMT2C,LAMP1,LGMN,LIG1,MAFB,MAFF,MAP3K1,MCM6,NCAPH,NFE2L2,NGFR,NPTX1,NQO1,NRP2,NTHL1,OPTN,OSGIN1,PCNA,PIK3CA,…
TF	Factor: Sp2; motif: GGSNNGGGGGCGGGGCCNGNGS	TF:M09658	0.00373273	2.42797	5456	221	93	20044	ABCC8,ADRA2A,AGO4,AKT2,APOE,ATG3,ATR,B3GNT5,BAG3,BCL2,BMI1,BNIP3,BNIP3L,CABLES1,CASP6,CD83,CLIC4,CLSTN1,COTL1,COX5B,DOT1L,DUSP7,EHMT2,EP300,FABP5,GRM2,HDAC1,HPRT1,IFNAR2,IGF2R,IRAK2,JAM2,KAT2A,KAT2B,KMT2C,LAMP1,LIG1,MAFF,MAP3K1,MCM6,MYORG,NFE2L2,NGFR,NPTX1,PAK1,PCNA,PIK3CA,POLE,PPFIA4,PRKAR2B,RAD9A,RALB,RELB,RELN,RHOA,RIPK1,SESN1,SIN3A,SOD2,SOX9,STMN1,SUV39H2,SYP,TMCC3,TMEM64,TSPAN18,VPS4A,ABL1,A…
TF	Factor: KLF15; motif: NCCMCGCCCMCN; match class: 1	TF:M12158_1	0.0039145	2.40732	6194	221	102	20044	AKT2,APOE,ATR,B3GNT5,BAG3,BDNF,BECN1,BMI1,BNIP3,CABLES1,CD83,CKS1B,CLIC4,COTL1,CRIP1,CSK,DAB2,DLG4,DNMT3A,DOCK1,DUSP7,EHMT2,EP300,FABP5,GRIA1,GRIN2B,GRM2,HPRT1,HSPB1,IFNAR2,IGF2R,IRAK2,JAM2,JUN,KAT2A,KAT2B,KDM5C,KDM6A,KMT2C,LIG1,MAFF,MAP3K1,MCM6,MDM2,MRE11,MSN,MYORG,NLGN1,PAK1,PCNA,PIK3CA,PPFIA4,PRKACA,PRKAR2A,PRKAR2B,RAB6B,RAC1,RAD51C,RAD9A,RALB,RELB,RELN,RHOA,RIPK1,RPA1,SETD1B,SIN3A,SLC6A1,SOD2…
TF	Factor: KROX; motif: CCCGCCCCCRCCCC	TF:M00982	0.00403721	2.39392	8073	221	124	20044	ADRA2A,AGO4,AKT2,APOE,ATG3,B3GNT5,BAG3,BAG4,BCL2,BDNF,BMI1,BNIP3,BNIP3L,CABLES1,CASP2,CASP6,CD47,CD83,CLIC4,CNN2,COTL1,COX5B,DAB2,DLG4,DNMT3A,DOCK1,EHMT2,EP300,EPG5,GRIA2,GRM2,HDAC1,HPRT1,HSPB1,IFNAR2,IGF2R,JAM2,JUN,KAT2A,KAT2B,KDM4D,KMT2C,LACC1,LAMP1,LIG1,MAFF,MAP3K1,MCM6,MRE11,MSN,NFE2L2,NGFR,NPTX1,OPTN,PAK1,PCNA,PIK3CA,POLE,PPFIA4,PRKACA,PRKAR2A,PRKAR2B,PTMS,RAC1,RAD50,RAD9A,RALB,RELB,RELN,RHO…
TF	Factor: ZXDL; motif: GSGSCNNGGGMRGCNCCGGGS; match class: 1	TF:M12722_1	0.00410522	2.38666	6868	221	110	20044	AGO4,AKT2,B3GNT5,BAG3,BAG4,BCL2,BMI1,BNIP3,BNIP3L,CASP6,CD47,CLIC4,CLSTN1,COTL1,CRIP1,DLG4,DNMT3A,DOCK1,DOT1L,DUSP7,EHMT2,EP300,EPCAM,HDAC1,HPRT1,HSPB1,IFNAR2,IGF2R,JAM2,KAT2A,KAT2B,KDM6A,KMT2C,LAMP1,LGMN,LIG1,MAFB,MAFF,MAP3K1,MCM6,MDM2,NFE2L2,NGFR,NLGN1,NPTX1,NTHL1,OSGIN1,PAK1,PIK3CA,PLXDC2,POLE,PRKACA,PRKAR2B,PRKCQ,PTMS,RAB6B,RAB7A,RAC1,RAD9A,RALB,RELB,RELN,RIPK1,SESN1,SETD1B,SIN3A,SLC44A1,SOD2…
TF	Factor: AP-2gamma:Elk-1; motif: NGCCKNRGGSGRCGGAAGTG	TF:M08441	0.00424923	2.37169	16725	221	208	20044	ABCC8,ADRA2A,AGO4,AKT2,APOE,ASB2,ATF3,ATG3,ATG5,ATR,B3GNT5,BAG3,BAG4,BCL2,BDNF,BECN1,BMI1,BNIP3,BNIP3L,CABLES1,CASP2,CASP6,CD47,CD83,CD8A,CDKN1A,CLIC4,CLSTN1,CNN2,COA5,COTL1,COX5B,CRIP1,CSK,CYP7B1,DAB2,DLG4,DNMT3A,DOCK1,DOT1L,DUSP7,EHMT2,EIF1,EP300,EPCAM,EPG5,FABP5,GRIA2,GRIN2B,GRM2,GRM3,GRN,HDAC1,HPRT1,HSPB1,IFNAR2,IGF2R,IRAK2,JAM2,JUN,KAT2A,KAT2B,KDM4D,KDM5C,KDM6A,KMT2C,LACC1,LAMP1,LAMP2,LGMN,L…
TF	Factor: Egr-1; motif: GCGCATGCG; match class: 1	TF:M04869_1	0.00445038	2.3516	10557	221	151	20044	ABCC8,ADRA2A,AGO4,AKT2,ATG3,ATG5,BAG3,BAG4,BCL2,BDNF,BMI1,BNIP3,BNIP3L,CABLES1,CASP2,CASP6,CD47,CD83,CDKN1A,CKS1B,CLIC4,CLSTN1,COA5,COX5B,CRIP1,CYP7B1,DAB2,DNMT3A,DOCK1,DOT1L,DUSP7,EHMT2,EIF1,EP300,EPCAM,FABP5,GRIA2,GRIN2B,GRM2,HDAC1,HPRT1,HSPB1,IFNAR2,IGF2R,JAM2,JUN,KAT2A,KAT2B,KDM4D,KDM5C,KDM6A,KMT2C,LACC1,LAMP1,LAMP2,LGMN,MAFB,MAFF,MAP3K1,MCM6,MDM2,MRE11,MYORG,NCAPH,NFE2L2,NGFR,NPTX1,NRP2,PAK1…
TF	Factor: ZNF614; motif: NCYCWGCCYYNNN; match class: 1	TF:M09862_1	0.00450112	2.34668	4302	221	78	20044	ABCC8,ADRA2A,AKT2,APOE,B3GNT5,BAG3,BMI1,BNIP3L,CASP6,CD8A,CLSTN1,COTL1,CRIP1,CSK,DLG4,DOT1L,DUSP7,EHMT2,EP300,GRIN2B,GRM2,GRM3,GRN,HDAC1,IFNAR2,IGF2R,KAT2A,LIG1,MAFB,MAP3K1,MCM6,MSN,MYORG,NPTX1,NTHL1,OPTN,PAK1,PIK3CA,PILRB,POLE,PPFIA4,PRKACA,PRKAR2B,RAB6B,RAD9A,RELB,RIPK1,SESN1,SOD2,SOX9,STMN1,TMEM64,TSPAN18,ACTN1,ADCY9,AKT1S1,APAF1,ARHGEF10,CACNA1C,CCND1,CHRNA7,CNTN1,CPT1B,CRTC2,DRD2,EGFL7,GABRG…
TF	Factor: MAZ; motif: GGGMGGGGS; match class: 1	TF:M10432_1	0.00457016	2.34007	4534	221	81	20044	ABCC8,ADRA2A,AKT2,APOE,B3GNT5,BAG3,BDNF,BMI1,BNIP3,CABLES1,CD83,CLIC4,CLSTN1,CNN2,COTL1,DAB2,DLG4,DNMT3A,DOT1L,EHMT2,EIF1,EP300,GRIN2B,GRM2,HSPB1,IFNAR2,IGF2R,JAM2,KAT2B,KDM6A,KMT2C,LIG1,MAFB,MAP3K1,NFE2L2,NGFR,NPTX1,OPTN,PAK1,PEX14,PILRB,POLE,PPFIA4,PRKACA,PRKAR2B,PTMS,RAB6B,RELN,RHOA,SETD1B,SIN3A,SMC1A,STMN1,TARBP2,TET1,TSPAN18,ABL1,ACTN1,ADCY9,APC,ARHGEF10,CACNA1C,CCND1,CHRNA7,CNR1,DRD2,EGFL7,…
TF	Factor: EGR1; motif: NCNCCGCCCCCGCN	TF:M07208	0.00462081	2.33528	6380	221	104	20044	ADRA2A,AKT2,APOE,ATG3,B3GNT5,BAG3,BAG4,BCL2,BDNF,BMI1,BNIP3L,CABLES1,CD83,COTL1,COX5B,CRIP1,DNMT3A,EHMT2,EP300,GRIA2,GRIN2B,HDAC1,HPRT1,IFNAR2,IGF2R,JAM2,KAT2A,KAT2B,KDM6A,KMT2C,LACC1,LAMP2,LGMN,LIG1,MAFF,MAP3K1,MCM6,MDM2,MRE11,NFE2L2,NLGN1,NPTX1,OPTN,PAK1,PIK3CA,POLE,PPFIA4,PRKACA,PRKAR2A,PRKAR2B,PTMS,RAB6B,RAB7A,RAC1,RAD50,RAD51C,RAD9A,RALB,RELB,RELN,RHOA,RPA1,SESN1,SETD1B,SETDB1,SIN3A,SOD2,SOX…
TF	Factor: E2F-1; motif: NNNSSCGCSAANN	TF:M07250	0.00480828	2.31801	11048	221	156	20044	ABCC8,ADRA2A,AGO4,AKT2,ATG3,ATG5,B3GNT5,BAG3,BDNF,BMI1,BNIP3,BNIP3L,CABLES1,CASP2,CASP6,CD47,CD83,CDKN1A,CKS1B,CLIC4,CLSTN1,CNN2,COA5,COTL1,COX5B,CRIP1,CYP7B1,DOCK1,EIF1,EP300,EPCAM,FABP5,GRIA2,GRM2,GRN,IFNAR2,IGF2R,IRAK2,JAM2,JUN,KAT2A,KDM6A,KMT2C,LACC1,LAMP1,LAMP2,LIG1,MAFB,MAP3K1,MCM6,MDM2,MSN,NPTX1,NQO1,NRP2,NTHL1,OPTN,PAK1,PCNA,PIK3CA,PILRB,PLXDC2,POLE,PPFIA4,PRKACA,PRKAR2A,PRKAR2B,PTMS,RAB6…
TF	Factor: PHB; motif: NCCCAGCCCCY	TF:M12725	0.00490037	2.30977	10004	221	145	20044	ABCC8,ADRA2A,AGO4,AKT2,APOE,ASB2,ATG3,ATR,B3GNT5,BAG3,BAG4,BECN1,BMI1,CABLES1,CASP2,CASP6,CD83,CD8A,CLIC4,CLSTN1,COA5,COTL1,COX5B,CRIP1,CSK,DAB2,DLG4,DNMT3A,DOCK1,DUSP7,EHMT2,EP300,EPCAM,GRIA1,GRIN2B,GRM2,GRM3,GRN,HDAC1,HPRT1,HSPB1,IFNAR2,IGF2R,JAM2,KAT2A,KDM6A,KMT2C,LGMN,LIG1,MAFB,MAFF,MAP3K1,MCM6,MDM2,MSN,MYORG,NFE2L2,NGFR,NPTX1,NQO1,NTHL1,PAK1,PCNA,PIK3CA,PILRB,POLE,PPFIA4,PRKACA,PRKAR2B,PROS1…
TF	Factor: WT1; motif: RGGNGGGGGAGGRGGNGGRG	TF:M10108	0.00498732	2.30213	6724	221	108	20044	ABCC8,AGO4,AKT2,APOE,B3GNT5,BAG3,BCL2,BDNF,BMI1,BNIP3,BNIP3L,CABLES1,CD83,CLSTN1,COTL1,COX5B,CRIP1,DLG4,DNMT3A,DOCK1,DOT1L,EHMT2,EPCAM,GRIA2,GRIN2B,GRM3,HDAC1,HPRT1,IFNAR2,IGF2R,JAM2,KAT2B,KDM6A,KMT2C,LAMP2,LGMN,LIG1,MAFF,MAP3K1,MEF2C,MRE11,NGFR,NPTX1,NRP2,NTHL1,OPTN,PAK1,POLE,PRKAR2B,PRKCQ,RAB6B,RAC1,RAD51B,RHOA,RIPK1,RIPK2,SETD1B,SETDB1,SLC44A1,SLC6A1,SOX9,STMN1,SUV39H2,SYP,TARBP2,TET1,TMCC3,TN…
TF	Factor: E2F-1; motif: NNNNGGCGGGAARN; match class: 1	TF:M09892_1	0.00535459	2.27127	9460	221	139	20044	ADRA2A,AGO4,AKT2,ATG3,B3GNT5,BAG3,BAG4,BCL2,BDNF,BMI1,BNIP3,BNIP3L,CABLES1,CASP2,CD47,CD83,CKS1B,CLIC4,CLSTN1,CNN2,COTL1,CRIP1,DNMT3A,DOCK1,DOT1L,DUSP7,EHMT2,EIF1,EP300,EPCAM,GRM2,GRM3,HDAC1,HPRT1,IFNAR2,IGF2R,IRAK2,JAM2,JUN,KAT2A,KAT2B,KDM5C,KDM6A,KMT2C,LACC1,LAMP1,LGMN,LIG1,MAFF,MAP3K1,MDM2,MRE11,MSN,MYORG,NCAPH,NFE2L2,NGFR,NPTX1,NQO1,NTHL1,OPTN,PAK1,PCNA,PEX14,PILRB,PLXDC2,POLE,PRKACA,PRKAR2B,…
TF	Factor: Sp2; motif: GYCCCGCCYCYNNNN	TF:M07129	0.00537	2.27003	6482	221	105	20044	ABCC8,ADRA2A,AKT2,APOE,ATG3,ATR,B3GNT5,BAG3,BCL2,BNIP3,BNIP3L,CABLES1,CASP2,CASP6,CD83,CLIC4,CLSTN1,COTL1,COX5B,DAB2,DNMT3A,DOCK1,DOT1L,DUSP7,EHMT2,EP300,EPG5,GRM2,HDAC1,HPRT1,IFNAR2,IGF2R,JUN,KAT2A,KAT2B,KDM4D,KMT2C,LAMP2,LIG1,MAFB,MAFF,MAP3K1,MCM6,MRE11,MYORG,NFE2L2,NPTX1,OPTN,PAK1,PCNA,PEX14,PIK3CA,PLXDC2,POLE,PPFIA4,PRKACA,PRKAR2A,PRKAR2B,RAD50,RAD9A,RALB,RELB,RELN,RHOA,SESN1,SETDB1,SIN3A,SOD…
TF	Factor: ZBP89; motif: CCCCKCCCCCNN; match class: 1	TF:M07397_1	0.00570109	2.24404	3068	221	61	20044	AKT2,APOE,BAG3,BDNF,BECN1,BMI1,CABLES1,CD83,COTL1,DLG4,DNMT3A,EHMT2,EP300,GRM2,HDAC1,IGF2R,KAT2A,KAT2B,KMT2C,LIG1,MAFF,MAP3K1,NGFR,NPTX1,PAK1,PIK3CA,POLE,PPFIA4,PRKACA,RAD51C,RELB,RPA1,SETD1B,SETDB1,SOD2,TET1,TMEM64,TNFRSF10B,TSPAN18,ACTN1,AKT1S1,AMIGO1,APC,ARHGEF10,CCND1,CHRNA7,DRD2,EGFL7,EPHA6,GAD1,MAPKAPK2,MMP2,NKX6-2,PLEKHO2,POLR2J,PPP3CA,PRKN,PTPRR,RYR1,RYR2,SLC12A5
TF	Factor: ER71:E2A; motif: CASSTGNACCGGAWRYN; match class: 1	TF:M08568_1	0.00703115	2.15297	15419	221	197	20044	ABCC8,ADRA2A,AKT2,APOE,ASB2,ATG5,ATR,B3GNT5,BAG3,BAG4,BCL2,BDNF,BECN1,BMI1,BNIP3,BNIP3L,CABLES1,CASP2,CASP6,CD47,CD8A,CDKN1A,CKS1B,CLIC4,CLSTN1,CNN2,COA5,COTL1,COX5B,CRIP1,CSK,CYP7B1,DAB2,DNMT3A,DOCK1,DOT1L,DUSP7,EHMT2,EIF1,EPCAM,EPG5,FABP5,GRIA1,GRIA2,GRIN2B,GRM2,GRM3,GRN,HDAC1,HPRT1,HSPB1,IFNAR2,IGF2R,IRAK2,JAM2,JUN,KAT2A,KAT2B,KDM4D,KDM5C,KDM6A,KMT2C,LACC1,LAMP1,LAMP2,LGMN,LIG1,MAFB,MAFF,MAP3K…
TF	Factor: GEMIN3; motif: NCWGGRARRGRGNGNG	TF:M09727	0.00705457	2.15153	8771	221	131	20044	ABCC8,ADRA2A,AKT2,APOE,ASB2,ATG5,BAG3,BAG4,BCL2,BDNF,BNIP3,CABLES1,CASP2,CASP6,CD47,CD83,CDKN1A,CNN2,COA5,COTL1,CYP7B1,DAB2,DLG4,DNMT3A,DOCK1,DOT1L,EHMT2,EIF1,EPG5,FABP5,GRIA1,GRIN2B,GRM2,GRM3,GRN,HPRT1,IFNAR2,JAM2,KAT2A,KDM6A,LACC1,LAMP1,LIG1,MAFF,MAP3K1,MCM6,MRE11,MSN,MYORG,NGFR,NLGN1,NQO1,NTHL1,OPTN,OSGIN1,PAK1,PCNA,PIK3CA,PILRB,POLE,PPFIA4,PRKACA,PRKAR2B,PRKCQ,PTMS,RAB6B,RAB7A,RALB,RELB,RELN,…
TF	Factor: WT1; motif: NNGGGNGGGSGN; match class: 1	TF:M07436_1	0.00715606	2.14533	2735	221	56	20044	ABCC8,ADRA2A,AKT2,APOE,BAG4,BDNF,BECN1,BMI1,CABLES1,DAB2,DNMT3A,EHMT2,EP300,GRIN2B,IFNAR2,IGF2R,JAM2,KAT2B,KDM6A,KMT2C,LAMP2,LIG1,MAP3K1,NLGN1,NPTX1,OPTN,PAK1,PIK3CA,PRKCQ,RAB6B,RAD51C,RELN,RHOA,RPA1,SETD1B,SOD2,STMN1,SUV39H2,TARBP2,TET1,ACTN1,ADCY9,APC,ARHGEF10,CCND1,FGF12,GAD1,HDAC7,MMP2,NEGR1,NKX6-2,NR4A2,POLR2J,PPP3CA,PTPRR,RYR1
TF	Factor: SP1:SP3; motif: CCSCCCCCYCC	TF:M01219	0.007261	2.139	7026	221	111	20044	ADRA2A,AGO4,AKT2,APOE,ATG3,B3GNT5,BAG4,BCL2,BDNF,BECN1,BMI1,BNIP3,BNIP3L,CABLES1,CASP6,CD83,CD8A,CLIC4,CLSTN1,COX5B,DAB2,DLG4,DNMT3A,EHMT2,EP300,EPG5,GRM2,HDAC1,HPRT1,IFNAR2,IGF2R,JAM2,KAT2A,KAT2B,KDM6A,KMT2C,LACC1,LIG1,MAFB,MAFF,MAP3K1,MCM6,MRE11,MYORG,NFE2L2,NGFR,NPTX1,NTHL1,OPTN,PAK1,PCNA,PIK3CA,PLXDC2,PPFIA4,PRKAR2A,PRKAR2B,PRKCQ,PROS1,PTMS,RAD50,RAD51C,RAD9A,RALB,RELB,RELN,RHOA,RIPK2,RPA1,SI…
TF	Factor: EZI; motif: GGGGAGGGGRRGGRGRRGGRRR; match class: 1	TF:M10151_1	0.00759212	2.11964	588	221	21	20044	APOE,BAG3,BDNF,BMI1,COTL1,DLG4,DNMT3A,KAT2B,KMT2C,LIG1,NGFR,PAK1,POLE,PTMS,TET1,TNFRSF10B,TSPAN18,GAD1,HDAC7,NEGR1,PPP3CA
TF	Factor: SP1; motif: NCCCCKCCCCC; match class: 1	TF:M07226_1	0.00772419	2.11215	4055	221	74	20044	AKT2,APOE,B3GNT5,BAG3,BDNF,BMI1,BNIP3,BNIP3L,CABLES1,CD83,CLSTN1,CRIP1,DLG4,DNMT3A,DOT1L,EHMT2,EP300,EPCAM,GRM2,HDAC1,IFNAR2,IGF2R,KAT2A,KAT2B,KMT2C,LAMP2,LIG1,MAFF,MAP3K1,MYORG,NGFR,NPTX1,PAK1,PCNA,PEX14,POLE,PRKACA,RELB,SESN1,SETDB1,SOD2,SOX9,SUV39H2,SYP,TET1,TMEM64,TNFRSF10B,TRPM4,TSPAN18,VPS4A,ABL1,ACTN1,ADCY9,AKT1S1,AMIGO1,APC,ARHGEF10,CACNA1C,CCND1,CHRNA7,DRD2,EGFL7,EPHA6,FGF2,HAP1,ITGA7,MA…
TF	Factor: ZGPAT; motif: GRGGCWGNGGNG	TF:M09739	0.0077894	2.1085	8427	221	127	20044	ABCC8,ADRA2A,AKT2,APOE,ASB2,ATG3,B3GNT5,BAG3,BAG4,BECN1,BMI1,BNIP3L,CASP2,CASP6,CDKN1A,COTL1,CRIP1,CSK,DAB2,DLG4,DNMT3A,DOT1L,DUSP7,EHMT2,EIF1,EP300,EPCAM,EPG5,GRIA1,GRIN2B,GRM2,GRM3,GRN,GSN,HDAC1,HSPB1,IFNAR2,IGF2R,JAM2,JUN,KAT2A,KAT2B,KDM6A,KMT2C,LACC1,LAMP2,LGMN,LIG1,MAFB,MAP3K1,MDM2,MYORG,NFE2L2,NGFR,NLGN1,NQO1,NTHL1,OSGIN1,PAK1,PEX14,PIK3CA,PILRB,POLE,PRKACA,PRKAR2A,PTMS,RAB6B,RAB7A,RAC1,RAD…
TF	Factor: AP-2; motif: GSCCSCRGGCNRNRNN	TF:M00800	0.0100661	1.99714	9365	221	137	20044	ADRA2A,AGO4,ATG3,B3GNT5,BAG3,BCL2,BDNF,BMI1,BNIP3,BNIP3L,CABLES1,CASP2,CD83,CDKN1A,CLIC4,CLSTN1,COA5,COTL1,COX5B,CRIP1,CSK,CYP7B1,DOCK1,DUSP7,EHMT2,EP300,EPCAM,FABP5,GRIA1,GRIN2B,GRM3,GRN,HDAC1,HPRT1,IFNAR2,IRAK2,JUN,KAT2B,KDM6A,KMT2C,LACC1,LAMP1,LGMN,LIG1,MAFB,MAFF,MAP3K1,MCM6,MDM2,MRE11,MYORG,NCAPH,NFE2L2,NGFR,NLGN1,NPTX1,NRP2,OPTN,OSGIN1,PCNA,PIK3CA,POLE,PRKACA,PRKAR2A,PRKAR2B,PRKCQ,PTMS,RAB6B…
TF	Factor: E2F1; motif: NNNNNGCGSSAAAN	TF:M08874	0.0104774	1.97974	7417	221	115	20044	ABCC8,ADRA2A,AKT2,ATG3,ATG5,B3GNT5,BMI1,BNIP3,BNIP3L,CASP2,CASP6,CD47,CKS1B,CLIC4,COX5B,CRIP1,CYP7B1,DNMT3A,DOT1L,EHMT2,EIF1,EP300,EPCAM,FABP5,GRIA2,GRM3,HPRT1,IGF2R,JAM2,KAT2A,KDM4D,KDM6A,KMT2C,LACC1,LAMP1,LIG1,MAFF,MCM6,MDM2,MSN,MYORG,NFE2L2,NGFR,NPTX1,NRP2,PAK1,PCNA,PIK3CA,PLXDC2,POLE,PPFIA4,PRKAR2A,PRKAR2B,PRKCQ,PTMS,RAD50,RAD51B,RAD51C,RAD9A,RHOA,RIPK1,S100A10,SETDB1,SIN3A,SLC44A1,SLC6A1,SMC…
TF	Factor: ZNF148; motif: NNCCCCTCCCCC	TF:M12464	0.0106154	1.97406	7076	221	111	20044	ABCC8,AKT2,APOE,ATG5,ATR,BAG3,BAG4,BDNF,BMI1,CASP2,CD83,CLSTN1,CNN2,COTL1,CYP7B1,DLG4,DNMT3A,DOT1L,DUSP7,EHMT2,EPCAM,GRIA1,GRIA2,GRIN2B,GRM2,GRM3,HDAC1,HPRT1,HSPB1,IRAK2,JAM2,JUN,KAT2A,KAT2B,KDM4D,KDM5C,KDM6A,KMT2C,LAMP2,LIG1,MAP3K1,MEF2C,NCAPH,NFE2L2,NGFR,NPTX1,NQO1,OPTN,PAK1,PEX14,PIK3CA,PILRB,POLE,PPFIA4,PRKACA,PRKAR2B,PRKCQ,PTMS,RAB6B,RAC1,RPA1,RPL28,S100A10,SETD1B,SETDB1,SIN3A,SMC1A,SOX9,STM…
TF	Factor: ZNF460; motif: NNACNCCCCCCNN; match class: 1	TF:M12313_1	0.0113508	1.94497	2292	221	49	20044	ABCC8,BCL2,BDNF,BECN1,BMI1,BNIP3L,CLIC4,CNN2,CRIP1,DAB2,DLG4,DNMT3A,DUSP7,EP300,GRIN2B,GRM2,IGF2R,JUN,KAT2A,KDM4D,KMT2C,MCM6,NCAPH,NGFR,RAD51C,RELN,SETD1B,SOD2,SOX9,STMN1,TARBP2,TMCC3,ACTN1,ADCY9,APC,CACNA1C,CCND1,CPT1B,GAD1,HCN1,HDAC7,HGF,MAPKAPK2,MMP2,NKX6-2,PNKD,POLR2J,TENM2,USP21
TF	Factor: E2F-1; motif: WWTGGCGCCAAA	TF:M04515	0.0116771	1.93266	13705	221	181	20044	ABCC8,ADRA2A,AGO4,AKT2,APOE,ATG3,ATG5,ATR,B3GNT5,BAG3,BAG4,BCL2,BDNF,BMI1,BNIP3,BNIP3L,CASP2,CASP6,CD47,CD83,CLIC4,CLSTN1,CNN2,COTL1,COX5B,CRIP1,CSK,CYP7B1,DLG4,DNMT3A,DOCK1,DOT1L,DUSP7,EHMT2,EIF1,EP300,EPCAM,EPG5,FABP5,GRIA2,GRIN2B,GRM2,GRM3,GRN,HDAC1,HPRT1,IFNAR2,IGF2R,IRAK2,JAM2,JUN,KAT2A,KAT2B,KDM4D,KDM5C,KDM6A,KMT2C,LAMP1,LAMP2,LGMN,LIG1,MAFB,MAFF,MAP3K1,MCM6,MRE11,MSN,NCAPH,NGFR,NLGN1,NPTX1…
TF	Factor: SP1; motif: NRGKGGGCGGGGCN	TF:M09765	0.012903	1.88931	7705	221	118	20044	ABCC8,AKT2,APOE,ATG3,ATR,B3GNT5,BAG3,BDNF,BMI1,BNIP3,BNIP3L,CABLES1,CASP2,CASP6,CD47,CD83,CLIC4,CLSTN1,COTL1,COX5B,CRIP1,CSK,DAB2,DNMT3A,DOT1L,DUSP7,EHMT2,EP300,FABP5,GRM2,HDAC1,HPRT1,HSPB1,IFNAR2,IGF2R,IRAK2,KAT2A,KAT2B,KDM4D,KDM6A,KMT2C,LAMP2,LIG1,MAFB,MAFF,MAP3K1,MCM6,MRE11,MYORG,NFE2L2,NPTX1,OPTN,PAK1,PCNA,PEX14,PIK3CA,PLXDC2,POLE,PPFIA4,PRKACA,PRKAR2A,PRKAR2B,RAD50,RAD9A,RALB,RELB,RELN,RHOA,…
TF	Factor: ZF5; motif: NRNGNGCGCGCWN; match class: 1	TF:M00333_1	0.0132431	1.87801	12784	221	172	20044	ABCC8,ADRA2A,AGO4,AKT2,APOE,ATG3,ATG5,B3GNT5,BAG3,BAG4,BCL2,BDNF,BMI1,BNIP3,BNIP3L,CABLES1,CASP2,CASP6,CD47,CD83,CD8A,CDKN1A,CKS1B,CLIC4,CLSTN1,COA5,COTL1,COX5B,CRIP1,CYP7B1,DNMT3A,DOCK1,DOT1L,DUSP7,EHMT2,EIF1,EP300,EPCAM,EPG5,FABP5,GRIA1,GRIA2,GRIN2B,GRM2,GRM3,GRN,HPRT1,HSPB1,IFNAR2,IGF2R,IRAK2,JAM2,JUN,KAT2A,KAT2B,KDM4D,KDM6A,KMT2C,LAMP1,LIG1,MAFB,MAFF,MAP3K1,MCM6,MDM2,NCAPH,NFE2L2,NGFR,NLGN1,N…
TF	Factor: Egr-2; motif: GNGRRNGWGKGGGNGGRG	TF:M09898	0.0140876	1.85116	6690	221	106	20044	ABCC8,AKT2,APOE,ATG3,B3GNT5,BAG3,BCL2,BDNF,BECN1,BMI1,BNIP3L,CABLES1,CD47,CD83,COTL1,DLG4,DNMT3A,DOCK1,DOT1L,DUSP7,EHMT2,GRIN2B,GRM3,HDAC1,IFNAR2,IGF2R,JAM2,KAT2B,KMT2C,LAMP2,LGMN,LIG1,MAFF,MAP3K1,MCM6,MDM2,MRE11,MSN,NLGN1,NPTX1,NTHL1,OPTN,PAK1,PIK3CA,PLXDC2,POLE,PRKACA,PRKAR2B,PTMS,RAB6B,RAB7A,RAC1,RAD50,RAD51B,RAD9A,RALB,RELB,RELN,RHOA,RPA1,SESN1,SETD1B,SETDB1,SOD2,SOX9,SUV39H2,SYP,TARBP2,TET1,…
TF	Factor: EGR; motif: CGCCCCCGCNN	TF:M08878	0.0148097	1.82945	7724	221	118	20044	ADRA2A,AGO4,AKT2,APOE,ATG3,B3GNT5,BAG3,BAG4,BCL2,BDNF,BMI1,BNIP3,BNIP3L,CABLES1,CASP2,CD47,CD83,CKS1B,CLIC4,CNN2,COTL1,COX5B,DLG4,DOCK1,EHMT2,EP300,EPCAM,GRIA2,HDAC1,HPRT1,HSPB1,IFNAR2,IGF2R,JAM2,JUN,KAT2A,KAT2B,KDM4D,KMT2C,LACC1,LAMP1,LIG1,MAFF,MAP3K1,MCM6,MRE11,NFE2L2,NGFR,NPTX1,NRP2,OPTN,PAK1,PEX14,PIK3CA,PLXDC2,POLE,PRKACA,PRKAR2A,PRKAR2B,PTMS,RAC1,RAD50,RAD9A,RALB,RELB,RELN,RHOA,RIPK1,RPA1,S…
TF	Factor: Egr-1; motif: NGCGTGCGY	TF:M04950	0.0150393	1.82277	11211	221	156	20044	ABCC8,AGO4,AKT2,ATG3,ATR,BAG3,BCL2,BDNF,BECN1,BMI1,BNIP3,BNIP3L,CABLES1,CASP2,CD47,CD83,CD8A,CDKN1A,CKS1B,CLSTN1,CNN2,COA5,COTL1,COX5B,CSK,CYP7B1,DOCK1,DOT1L,DUSP7,EHMT2,EP300,EPCAM,FABP5,GRIA1,GRIA2,GRIN2B,GRM2,HPRT1,HSPB1,IFNAR2,IGF2R,IRAK2,JAM2,JUN,KAT2B,KDM6A,KMT2C,LACC1,LAMP1,LAMP2,LGMN,MAFB,MAFF,MAP3K1,MDM2,MRE11,NFE2L2,NGFR,NPTX1,NQO1,NRP2,NTHL1,OPTN,PCNA,PIK3CA,PLXDC2,PRKAR2A,PRKCQ,RAB6B,…
TF	Factor: E2F-4; motif: NNTTCCCGCCNN	TF:M04823	0.0153437	1.81407	13114	221	175	20044	ABCC8,ADRA2A,AGO4,AKT2,APOE,ATG3,ATR,B3GNT5,BAG3,BAG4,BCL2,BDNF,BMI1,BNIP3,BNIP3L,CABLES1,CASP2,CD47,CD83,CDKN1A,CKS1B,CLIC4,CLSTN1,CNN2,COA5,COTL1,COX5B,CRIP1,DNMT3A,DOCK1,DOT1L,DUSP7,EHMT2,EIF1,EP300,EPCAM,EPG5,FABP5,GRIA2,GRIN2B,GRM2,GRM3,GRN,GSN,HDAC1,HPRT1,IFNAR2,IGF2R,IRAK2,JAM2,JUN,KAT2A,KAT2B,KDM4D,KDM6A,KMT2C,LACC1,LAMP1,LGMN,LIG1,MAFF,MAP3K1,MDM2,MRE11,MYORG,NCAPH,NFE2L2,NGFR,NPTX1,NQO1…
TF	Factor: GKLF; motif: NNRRGRRNGNSNNN	TF:M07040	0.0159248	1.79793	13016	221	174	20044	ABCC8,ADRA2A,AGO4,AKT2,APOE,ASB2,ATG3,ATG5,ATR,BAG3,BAG4,BCL2,BDNF,BECN1,BMI1,BNIP3,BNIP3L,CASP2,CASP6,CD47,CD83,CD8A,CDKN1A,CKS1B,CLSTN1,CNN2,COTL1,COX5B,CRIP1,CSK,DAB2,DLG4,DNMT3A,DOCK1,DOT1L,DUSP7,EHMT2,EIF1,EP300,EPCAM,EPG5,GRIA1,GRIA2,GRIN2B,GRM2,GRM3,GRN,HDAC1,HPRT1,HSPB1,IFNAR2,IRAK2,JAM2,JUN,KAT2A,KAT2B,KDM4D,KDM5C,KDM6A,KMT2C,LACC1,LAMP2,LIG1,MAFB,MAP3K1,MDM2,MEF2C,MRE11,MSN,MYORG,NCAPH,…
TF	Factor: E2F-4; motif: NNTTCCCGCCNN; match class: 1	TF:M04823_1	0.0160268	1.79515	8085	221	122	20044	ADRA2A,AGO4,AKT2,ATG3,B3GNT5,BAG4,BCL2,BDNF,BMI1,BNIP3,BNIP3L,CABLES1,CASP2,CD47,CD83,CKS1B,CLIC4,CLSTN1,CNN2,COTL1,CRIP1,DNMT3A,DOCK1,DOT1L,DUSP7,EHMT2,EIF1,EP300,EPCAM,GRM2,GRM3,HPRT1,IFNAR2,IGF2R,IRAK2,JAM2,JUN,KAT2A,KAT2B,KDM6A,KMT2C,LACC1,LAMP1,LGMN,LIG1,MAFF,MDM2,MYORG,NCAPH,NFE2L2,NGFR,NPTX1,NQO1,OPTN,PAK1,PEX14,PILRB,PLXDC2,POLE,PRKACA,PRKAR2B,PRKCQ,PTMS,RAC1,RAD50,RAD51B,RAD51C,RAD9A,RAL…
TF	Factor: Sp2; motif: NYSGCCCCGCCCCCY; match class: 1	TF:M03567_1	0.0161011	1.79314	3756	221	69	20044	ABCC8,B3GNT5,BAG3,BNIP3,BNIP3L,CABLES1,CASP6,CD83,CLSTN1,DOT1L,DUSP7,EHMT2,EP300,GRM2,HDAC1,HPRT1,IFNAR2,IGF2R,KAT2A,KAT2B,KMT2C,LIG1,MAFF,MAP3K1,MRE11,MYORG,OPTN,PAK1,PCNA,POLE,PPFIA4,PRKACA,PRKAR2A,PRKAR2B,RELB,RELN,RIPK1,SESN1,SOD2,SOX9,STMN1,SUV39H2,TMEM64,TRIM47,TRPM4,TSPAN18,VPS4A,ABL1,ACTN1,ADCY9,AKT1S1,APC,CHRNA7,CNTN1,CPT1B,DRD2,EGFL7,EPHA6,FGF2,HDAC7,MAPKAPK2,NES,PLEKHO2,POLR2J,PRKAA2,P…
TF	Factor: sp4; motif: NNNGCYCCGCCCCCY	TF:M10530	0.0173386	1.76099	8450	221	126	20044	ABCC8,AKT2,APOE,ATG3,ATR,B3GNT5,BAG3,BDNF,BMI1,BNIP3,BNIP3L,CABLES1,CASP2,CASP6,CD47,CD83,CD8A,CKS1B,CLIC4,CLSTN1,CNN2,COTL1,COX5B,DAB2,DNMT3A,DOT1L,DUSP7,EHMT2,EIF1,EP300,EPCAM,EPG5,GRM2,HDAC1,HPRT1,IFNAR2,IGF2R,IRAK2,KAT2A,KAT2B,KDM4D,KDM6A,KMT2C,LAMP2,LIG1,MAFB,MAFF,MAP3K1,MCM6,MRE11,MSN,MYORG,NGFR,NPTX1,NTHL1,OPTN,PAK1,PCNA,PEX14,PIK3CA,PLXDC2,POLE,PPFIA4,PRKACA,PRKAR2A,PRKAR2B,RAD50,RAD9A,RA…
TF	Factor: ZNF383; motif: SSNGGGMGGNGSNGGS	TF:M12703	0.017751	1.75078	9355	221	136	20044	ABCC8,ADRA2A,AGO4,AKT2,APOE,ATF3,B3GNT5,BAG3,BAG4,BCL2,BDNF,BECN1,BMI1,BNIP3,BNIP3L,CABLES1,CASP6,CD83,CLSTN1,CNN2,COA5,COTL1,COX5B,DLG4,DNMT3A,DOCK1,DOT1L,DUSP7,EHMT2,EIF1,EPCAM,FABP5,GRIN2B,GRM2,GRM3,GSN,HDAC1,HPRT1,IFNAR2,IGF2R,IRAK2,JAM2,KAT2B,KDM4D,KDM6A,KMT2C,LAMP1,LGMN,LIG1,MAFF,MAP3K1,MCM6,NFE2L2,NGFR,NPTX1,NTHL1,OPTN,PAK1,PCNA,PEX14,PIK3CA,PLXDC2,POLE,PPFIA4,PRKACA,PRKAR2A,PRKAR2B,PRKCQ,…
TF	Factor: ZNF692; motif: SYNGGSCCCASCCNC	TF:M09734	0.0186269	1.72986	12027	221	164	20044	ABCC8,ADRA2A,AGO4,AKT2,APOE,ASB2,ATG3,ATG5,B3GNT5,BAG3,BCL2,BDNF,BECN1,BMI1,BNIP3,CABLES1,CASP6,CD47,CD83,CD8A,CKS1B,CLIC4,CLSTN1,CNN2,COA5,COTL1,CRIP1,CSK,CYP7B1,DAB2,DLG4,DNMT3A,DOCK1,DOT1L,DUSP7,EHMT2,EIF1,EP300,EPCAM,EPG5,GRIN2B,GRM2,GRM3,GRN,HDAC1,HPRT1,IFNAR2,IGF2R,JAM2,JUN,KAT2A,KAT2B,KDM5C,KDM6A,KMT2C,LAMP2,LGMN,LIG1,MAFB,MAP3K1,MDM2,MSN,MYORG,NCAPH,NGFR,NLGN1,NPTX1,NQO1,NRP2,NTHL1,OPTN,P…
TF	Factor: TR4; motif: ACCCCGS; match class: 1	TF:M04934_1	0.0197281	1.70492	15788	221	199	20044	ABCC8,ADRA2A,AGO4,AKT2,APOE,ASB2,ATF3,ATG3,ATG5,ATR,BAG3,BAG4,BCL2,BDNF,BECN1,BMI1,BNIP3,BNIP3L,CABLES1,CASP2,CASP6,CD47,CD8A,CDKN1A,CKS1B,CLIC4,CLSTN1,CNN2,COA5,COTL1,COX5B,CRIP1,CSK,CYP7B1,DAB2,DLG4,DNMT3A,DOCK1,DOT1L,DUSP7,EHMT2,EIF1,EP300,EPG5,FABP5,GRIA2,GRIN2B,GRM2,GRN,HPRT1,HSPB1,IFNAR2,IGF2R,IRAK2,JAM2,JUN,KAT2A,KAT2B,KDM4D,KDM5C,KDM6A,KMT2C,LAMP1,LAMP2,LGMN,LIG1,MAFB,MAFF,MAP3K1,MCM6,MDM…
TF	Factor: E2F-1; motif: TTGGCGCGRAANNGNM	TF:M00938	0.0209552	1.67871	7512	221	115	20044	ABCC8,ADRA2A,AGO4,AKT2,BNIP3,CASP2,CASP6,CD47,CD83,CDKN1A,CKS1B,CLIC4,CNN2,COTL1,COX5B,CRIP1,CYP7B1,DNMT3A,DOT1L,DUSP7,EP300,EPCAM,EPG5,FABP5,GRIA2,GRIN2B,HPRT1,IGF2R,IRAK2,JAM2,KAT2A,KAT2B,KDM5C,KDM6A,KMT2C,LAMP1,LGMN,LIG1,MAFB,MAFF,MAP3K1,MCM6,MSN,NCAPH,NFE2L2,NLGN1,NPTX1,NRP2,NTHL1,PCNA,PEX14,PIK3CA,PLXDC2,POLE,PRDX1,PRKACA,PRKAR2B,PRKCQ,PTMS,RAB6B,RAC1,RAD51B,RAD9A,RELN,RHOA,RIPK1,RIPK2,RPA1,…
TF	Factor: PATZ; motif: GGGGNGGGGGMKGGRRNGGNRN; match class: 1	TF:M10026_1	0.0222784	1.65212	5109	221	86	20044	AGO4,AKT2,APOE,B3GNT5,BAG3,BDNF,BMI1,BNIP3L,CABLES1,CD83,CLSTN1,COTL1,DNMT3A,DOCK1,DOT1L,DUSP7,EHMT2,EPCAM,GRIN2B,GRM2,GRM3,HPRT1,HSPB1,IFNAR2,IGF2R,KAT2A,KAT2B,KMT2C,LAMP1,LIG1,MAP3K1,MRE11,NGFR,NPTX1,OPTN,PAK1,PEX14,PIK3CA,POLE,PPFIA4,PRKACA,PRKAR2B,PTMS,RAB6B,RAC1,RAD51B,RAD9A,RALB,RELB,RELN,RHOA,RIPK2,SETD1B,SMC1A,SOD2,SYP,TET1,TMCC3,TNFRSF10B,TSPAN18,VPS4A,ACTN1,ADCY9,CACNA1C,CCND1,CHRNA7,CP…
TF	Factor: DATF1; motif: SNGGRRGCWGNGGG; match class: 1	TF:M09724_1	0.0222843	1.652	2981	221	58	20044	AKT2,APOE,CASP6,CD47,CD8A,CRIP1,DLG4,DOT1L,DUSP7,EHMT2,EIF1,GRIA1,GRM2,GRM3,HDAC1,HSPB1,JAM2,KMT2C,LACC1,MAP3K1,NPTX1,PEX14,PLXDC2,PPFIA4,PRKACA,PTMS,RALB,RELB,RIPK1,SLC44A1,SOX9,SUV39H1,SYP,TET1,TSPAN18,ACTN1,APC,CACNA1C,CALB2,CCND1,CHRNA7,CNR1,CPT1B,DRD2,EGFL7,GABRG2,GAD1,HDAC7,ITGA7,ITPR1,NEGR1,PLEKHO2,PPP3CA,PRKAA2,PRKCG,RASGRP1,SLC12A5,TAF10
TF	Factor: E2F-3:T-bet; motif: AGGTGTNANGGCGCST; match class: 1	TF:M08529_1	0.0230226	1.63785	4954	221	84	20044	ABCC8,BCL2,BDNF,BNIP3,CABLES1,CD47,CKS1B,CLIC4,CLSTN1,COX5B,CYP7B1,DOCK1,DUSP7,EPG5,GRIA1,GRIA2,GRIN2B,GRN,HPRT1,HSPB1,KAT2B,KMT2C,LAMP1,LGMN,LIG1,MAFB,MAP3K1,MRE11,NGFR,NQO1,NTHL1,PAK1,PEX14,PILRB,PLXDC2,POLE,PRKACA,PTMS,RAC1,RAD50,RELB,RELN,RIPK1,SETD1B,SLC44A1,SOX9,SUV39H2,SYP,TMCC3,TPD52,VPS4A,ABL1,ACTN1,ADCY9,APAF1,APC,CACNA1C,CALB2,CAMK4,CCND1,CNR1,CNTN1,COL4A2,CRTC2,CXXC1,EGFL7,GABRR1,GAD1…
TF	Factor: SP2; motif: GGGCGGGAC; match class: 1	TF:M01783_1	0.023431	1.63021	4485	221	78	20044	ABCC8,AKT2,APOE,ATG3,B3GNT5,BAG3,BNIP3,BNIP3L,CASP2,CASP6,CD47,CDKN1A,CKS1B,CLIC4,CNN2,COTL1,CRIP1,DOCK1,DOT1L,DUSP7,EHMT2,EP300,GRM2,HDAC1,HPRT1,IGF2R,KAT2A,KMT2C,LAMP2,LIG1,MAFF,MYORG,NGFR,NPTX1,NQO1,OPTN,PAK1,PCNA,PILRB,POLE,PRKACA,PRKAR2A,PRKAR2B,PRKCQ,RALB,RELB,RELN,RIPK1,RPL28,SESN1,SLC44A1,SOD2,SUV39H2,TMEM64,TRIM47,TRPM4,TSPAN18,VPS4A,ABL1,ADCY9,AKT1S1,CHRNA7,CNR1,COL4A2,DRD2,EGFL7,HAP1,M…
TF	Factor: ZF5; motif: NRNGNGCGCGCWN	TF:M00333	0.0241973	1.61623	15464	221	196	20044	ABCC8,ADRA2A,AGO4,AKT2,APOE,ATG3,ATG5,ATR,B3GNT5,BAG3,BAG4,BCL2,BDNF,BMI1,BNIP3,BNIP3L,CABLES1,CASP2,CASP6,CD47,CD83,CD8A,CDKN1A,CKS1B,CLIC4,CLSTN1,CNN2,COA5,COTL1,COX5B,CRIP1,CSK,CYP7B1,DNMT3A,DOCK1,DOT1L,DUSP7,EHMT2,EIF1,EP300,EPCAM,EPG5,FABP5,GRIA1,GRIA2,GRIN2B,GRM2,GRM3,GRN,HDAC1,HPRT1,HSPB1,IFNAR2,IGF2R,IRAK2,JAM2,JUN,KAT2A,KAT2B,KDM4D,KDM6A,KMT2C,LACC1,LAMP1,LIG1,MAFB,MAFF,MAP3K1,MCM6,MDM2,…
TF	Factor: E2F-3:FOXI1; motif: NGACACCGCGCCCAC	TF:M08208	0.0246045	1.60898	12874	221	172	20044	ABCC8,ADRA2A,AGO4,AKT2,APOE,ATG3,ATG5,ATR,B3GNT5,BAG3,BAG4,BCL2,BDNF,BECN1,BMI1,BNIP3,CABLES1,CASP2,CASP6,CD47,CD83,CD8A,CDKN1A,CKS1B,CLIC4,CLSTN1,CNN2,COA5,COTL1,COX5B,CRIP1,CYP7B1,DAB2,DLG4,DNMT3A,DOCK1,DOT1L,DUSP7,EHMT2,EIF1,EP300,EPCAM,EPG5,FABP5,GRIA2,GRIN2B,GRM2,GRN,HDAC1,HPRT1,HSPB1,IFNAR2,IGF2R,IRAK2,JUN,KAT2A,KAT2B,KDM4D,KMT2C,LACC1,LAMP1,LGMN,LIG1,MAFB,MAFF,MAP3K1,MCM6,MDM2,MSN,NCAPH,NF…
TF	Factor: E2F-2; motif: GCGCGCGCNCS	TF:M11529	0.0246101	1.60889	16673	221	206	20044	ABCC8,ADRA2A,AGO4,AKT2,APOE,ATG3,ATG5,ATR,B3GNT5,BAG3,BAG4,BCL2,BDNF,BECN1,BMI1,BNIP3,BNIP3L,CABLES1,CASP2,CASP6,CD47,CD83,CD8A,CDKN1A,CKS1B,CLIC4,CLSTN1,CNN2,COA5,COTL1,COX5B,CRIP1,CSK,CYP7B1,DAB2,DLG4,DNMT3A,DOCK1,DOT1L,DUSP7,EHMT2,EIF1,EP300,EPCAM,EPG5,FABP5,GRIA1,GRIA2,GRIN2B,GRM2,GRM3,GRN,HDAC1,HPRT1,HSPB1,IFNAR2,IGF2R,IRAK2,JAM2,JUN,KAT2A,KAT2B,KDM4D,KDM5C,KDM6A,KMT2C,LACC1,LAMP1,LAMP2,LGMN…
TF	Factor: ZNF383; motif: SSNGGGMGGNGSNGGS; match class: 1	TF:M12703_1	0.0257488	1.58924	4496	221	78	20044	ABCC8,ADRA2A,AGO4,AKT2,APOE,B3GNT5,BAG4,BCL2,BDNF,BMI1,BNIP3L,CD83,CLSTN1,CNN2,COTL1,DNMT3A,DOCK1,DOT1L,DUSP7,EHMT2,EPCAM,GRM2,HDAC1,HPRT1,IGF2R,JAM2,KAT2B,KDM6A,KMT2C,LIG1,MAP3K1,NPTX1,NTHL1,PAK1,PCNA,PEX14,PIK3CA,POLE,PRKACA,PRKCQ,PTMS,RALB,RELB,RHOA,RPA1,SETD1B,SLC44A1,SOD2,STMN1,SYP,TARBP2,TMCC3,TNFRSF10B,TSPAN18,VPS4A,ACTN1,ADCY9,ARHGEF10,CAMK4,CCND1,CHRNA7,CPT1B,DRD2,EGFL7,GAD1,HCN1,HDAC7,M…
TF	Factor: GKLF; motif: NNCCMCRCCCN; match class: 1	TF:M12173_1	0.0264253	1.57798	5130	221	86	20044	ABCC8,AGO4,ATG3,B3GNT5,BAG3,BMI1,BNIP3,BNIP3L,CASP2,CASP6,CD47,CDKN1A,CKS1B,CLIC4,CLSTN1,COTL1,DAB2,DOT1L,DUSP7,EHMT2,EP300,EPCAM,GRM2,HDAC1,HPRT1,HSPB1,IFNAR2,IRAK2,KAT2A,KMT2C,LAMP2,LGMN,LIG1,MAFB,MAFF,MAP3K1,MCM6,MYORG,NPTX1,OPTN,PAK1,PCNA,PEX14,PPFIA4,PRKACA,PRKAR2A,RAC1,RAD9A,RALB,RELB,RELN,RIPK1,SESN1,SETDB1,SOD2,SOX9,STMN1,SUV39H1,SUV39H2,TMEM64,TSPAN18,VPS4A,ABL1,ACTN1,ADCY9,AKT1S1,APC,CA…
TF	Factor: E2F-1:TBR2; motif: NGGTGNNANGGCGCNNTNNCRNNN	TF:M08523	0.026817	1.57159	12481	221	168	20044	ABCC8,ADRA2A,AGO4,AKT2,APOE,ATG3,ATG5,B3GNT5,BAG3,BAG4,BCL2,BDNF,BECN1,BMI1,BNIP3,BNIP3L,CABLES1,CASP2,CD47,CD83,CD8A,CDKN1A,CLIC4,CLSTN1,CNN2,COA5,COTL1,COX5B,CRIP1,DNMT3A,DOCK1,DOT1L,DUSP7,EHMT2,EIF1,EP300,EPCAM,EPG5,FABP5,GRIA2,GRIN2B,GRM2,GRN,GSN,HDAC1,HPRT1,HSPB1,IFNAR2,IGF2R,IRAK2,JAM2,JUN,KAT2A,KMT2C,LACC1,LAMP1,LIG1,MAFB,MAFF,MAP3K1,MCM6,MRE11,MSN,NCAPH,NFE2L2,NGFR,NLGN1,NPTX1,NQO1,NRP2,O…
TF	Factor: Churchill; motif: CGGGNN	TF:M00986	0.0270054	1.56855	14579	221	188	20044	ABCC8,ADRA2A,AGO4,AKT2,APOE,ATR,B3GNT5,BAG3,BAG4,BCL2,BDNF,BECN1,BMI1,BNIP3,BNIP3L,CABLES1,CASP2,CASP6,CD47,CD83,CD8A,CKS1B,CLIC4,CLSTN1,CNN2,COA5,COTL1,COX5B,CRIP1,CSK,DAB2,DLG4,DNMT3A,DOCK1,DOT1L,DUSP7,EHMT2,EIF1,EP300,EPCAM,FABP5,GRIA1,GRIA2,GRIN2B,GRM2,HDAC1,HPRT1,HSPB1,IFNAR2,IGF2R,IRAK2,JAM2,JUN,KAT2A,KAT2B,KDM4D,KDM5C,KDM6A,KMT2C,LACC1,LAMP1,LAMP2,LGMN,LIG1,MAFB,MAFF,MAP3K1,MDM2,MYORG,NCAP…
TF	Factor: ZNF142; motif: SNSCGCCCGCCCGCSCSS	TF:M12697	0.0271833	1.5657	3218	221	61	20044	AKT2,ATG5,ATR,BAG3,BCL2,BMI1,BNIP3L,CASP2,CD47,CNN2,COA5,COTL1,CRIP1,DAB2,DOT1L,DUSP7,FABP5,GRIN2B,GRM2,HDAC1,HPRT1,HSPB1,IGF2R,KAT2B,KMT2C,LIG1,MAFF,MAP3K1,MCM6,NGFR,NLGN1,NPTX1,PAK1,PRKACA,RAC1,RELB,RELN,RHOA,RIPK1,SETD1B,SOD2,TARBP2,TET1,TMEM64,TRIM47,TRPM4,VPS4A,ACTN1,ADCY9,CACNA1C,CHRNA7,CNR1,DRD2,EGFL7,HCN1,ITGA7,MAPKAPK2,NKX6-2,RASGRP1,RYR2,SLC12A5
TF	Factor: ctcf; motif: CCRSCAGGGGGCGCN; match class: 1	TF:M10426_1	0.0332127	1.4787	4526	221	78	20044	ABCC8,ADRA2A,AGO4,B3GNT5,BAG3,BCL2,BMI1,CASP6,CD8A,CLSTN1,COA5,CRIP1,DOCK1,DUSP7,EIF1,EP300,FABP5,HPRT1,JUN,KAT2B,KDM6A,KMT2C,LIG1,MAFF,MAP3K1,MDM2,NFE2L2,NPTX1,NTHL1,OPTN,PAK1,POLE,PRKAR2B,PRKCQ,PROS1,RAB6B,RELN,SETD1B,SIN3A,SLC44A1,SOX9,STMN1,SYP,TMCC3,TMEM64,TP53,TRIM47,TSPAN18,VPS4A,ABL1,ACTN1,ADCY9,APAF1,ATP6V0E1,CACNA1C,CALB2,CAMK4,CLU,CNR1,COL4A2,DBH,EGFL7,GAD1,HCN1,MAPKAPK2,NAGLU,NES,NKX6…
TF	Factor: PAX2; motif: NCANTSRAGCGTGACGR	TF:M12969	0.0341821	1.4662	6306	221	100	20044	ABCC8,ADRA2A,AGO4,AKT2,ATF3,ATR,BAG4,BECN1,BMI1,BNIP3,CD47,CD83,CD8A,CDKN1A,CLSTN1,COA5,COTL1,CRIP1,CSK,DNMT3A,DOCK1,DOT1L,DUSP7,EIF1,FABP5,HPRT1,HSPB1,IFNAR2,IRAK2,KDM5C,KDM6A,LACC1,LAMP1,LGMN,MAFB,MCM6,NCAPH,NLGN1,NPTX1,NRP2,OPTN,OSGIN1,PAK1,PIK3CA,PLXDC2,POLE,PRDX1,PRKACA,PRKAR2A,PRKAR2B,PTMS,RAB7A,RAC1,RAD51B,RAD51C,RAD9A,RELB,RELN,RHOA,RIPK1,RIPK2,RPL28,SLC17A6,SLC44A1,SOD2,SUV39H1,SUV39H2,T…
TF	Factor: E2F-4:DP-1; motif: TTTSGCGC	TF:M00738	0.0342909	1.46482	10099	221	143	20044	ABCC8,ADRA2A,AGO4,AKT2,ATG3,ATG5,B3GNT5,BAG3,BDNF,BMI1,BNIP3,BNIP3L,CASP2,CASP6,CD47,CD83,CD8A,CKS1B,CLIC4,CNN2,COTL1,COX5B,CRIP1,CYP7B1,DNMT3A,DOCK1,DOT1L,EHMT2,EIF1,EP300,EPCAM,FABP5,GRIA2,GRN,HPRT1,JAM2,JUN,KAT2A,KAT2B,KDM5C,KDM6A,KMT2C,LACC1,LAMP1,LAMP2,LIG1,MAFB,MAP3K1,MCM6,MDM2,MSN,MYORG,NFE2L2,NPTX1,NRP2,PAK1,PCNA,PEX14,PIK3CA,PILRB,PLXDC2,POLE,PPFIA4,PRKACA,PRKAR2A,PRKAR2B,PRKCQ,PTMS,RAB6…
TF	Factor: ZNF300; motif: SWGGGGGSN; match class: 1	TF:M07486_1	0.0381757	1.41821	7597	221	115	20044	AGO4,AKT2,APOE,BAG4,BCL2,BDNF,BECN1,BMI1,BNIP3L,CASP2,CASP6,CD83,CD8A,CKS1B,CLSTN1,CNN2,COA5,COTL1,CRIP1,CSK,DLG4,DNMT3A,DOT1L,DUSP7,EHMT2,EIF1,EP300,EPCAM,GRIA2,GRM3,HDAC1,HSPB1,IGF2R,IRAK2,JAM2,JUN,KAT2A,KAT2B,KDM4D,KDM6A,KMT2C,LAMP1,LGMN,LIG1,MAFF,MAP3K1,MCM6,NFE2L2,NGFR,NRP2,NTHL1,OPTN,PAK1,PILRB,POLE,PPFIA4,PRKACA,PRKAR2B,PRKCQ,PTMS,RAB6B,RAB7A,RAD9A,RALB,RELB,RELN,RHOA,RIPK2,S100A10,SETD1B,…
TF	Factor: E2F-1:TBR2; motif: NGGTGNNANGGCGCNNTNNCRNNN; match class: 1	TF:M08523_1	0.0406336	1.39111	7606	221	115	20044	ABCC8,ADRA2A,AGO4,AKT2,BAG3,BCL2,BDNF,BECN1,BMI1,BNIP3,CASP2,CD47,CD83,CLIC4,CLSTN1,CNN2,DNMT3A,DOCK1,DOT1L,DUSP7,EIF1,EP300,EPCAM,EPG5,FABP5,GRIA2,GRIN2B,HDAC1,HSPB1,IFNAR2,IRAK2,JUN,KMT2C,LACC1,LAMP1,MAFB,MAFF,MAP3K1,MCM6,NCAPH,NGFR,NLGN1,NPTX1,NQO1,PAK1,PCNA,PEX14,PLXDC2,POLE,PRKACA,PRKAR2A,PRKAR2B,PRKCQ,PTMS,RAB6B,RAC1,RAD50,RAD9A,RALB,RELB,RELN,RHOA,RIPK1,RIPK2,SESN1,SETD1B,SETDB1,SLC44A1,SO…
TF	Factor: E2F-4; motif: NGGCGGGAARN	TF:M07084	0.0406993	1.39041	11167	221	154	20044	ADRA2A,AKT2,APOE,ATG3,ATR,B3GNT5,BAG3,BAG4,BCL2,BDNF,BMI1,BNIP3,BNIP3L,CABLES1,CASP2,CD47,CD83,CKS1B,CLIC4,CLSTN1,CNN2,COA5,COTL1,CRIP1,DNMT3A,DOCK1,DOT1L,DUSP7,EHMT2,EIF1,EP300,EPCAM,FABP5,GRIA2,GRIN2B,GRM2,GRM3,GRN,GSN,HDAC1,HPRT1,IFNAR2,IGF2R,IRAK2,JAM2,JUN,KAT2A,KAT2B,KDM6A,KMT2C,LACC1,LAMP1,LGMN,LIG1,MAFF,MAP3K1,MDM2,MRE11,MYORG,NCAPH,NFE2L2,NGFR,NPTX1,NQO1,NRP2,OPTN,PAK1,PCNA,PEX14,PIK3CA,P…
TF	Factor: E2F-1; motif: NGGGCGGGARV	TF:M07206	0.0411701	1.38542	14970	221	191	20044	ABCC8,ADRA2A,AGO4,AKT2,APOE,ATG3,ATR,B3GNT5,BAG3,BAG4,BCL2,BDNF,BMI1,BNIP3,BNIP3L,CABLES1,CASP2,CASP6,CD47,CD83,CDKN1A,CKS1B,CLIC4,CLSTN1,CNN2,COA5,COTL1,COX5B,CRIP1,CYP7B1,DNMT3A,DOCK1,DOT1L,DUSP7,EHMT2,EIF1,EP300,EPCAM,EPG5,FABP5,GRIA2,GRIN2B,GRM2,GRM3,GRN,GSN,HDAC1,HPRT1,HSPB1,IFNAR2,IGF2R,IRAK2,JAM2,JUN,KAT2A,KAT2B,KDM4D,KDM5C,KDM6A,KMT2C,LACC1,LAMP1,LGMN,LIG1,MAFB,MAFF,MAP3K1,MCM6,MDM2,MRE11…
TF	Factor: AP2; motif: GCCYGSGGSN	TF:M08867	0.0414744	1.38222	10315	221	145	20044	ABCC8,ADRA2A,AGO4,AKT2,APOE,B3GNT5,BAG3,BAG4,BCL2,BDNF,BMI1,BNIP3,BNIP3L,CABLES1,CASP2,CD83,CDKN1A,CLIC4,CLSTN1,CNN2,COA5,COTL1,COX5B,CRIP1,CYP7B1,DAB2,DLG4,DOCK1,DOT1L,DUSP7,EHMT2,EP300,EPCAM,FABP5,GRIA1,GRIN2B,GRM2,GRN,HDAC1,HPRT1,HSPB1,IFNAR2,IGF2R,IRAK2,JAM2,JUN,KAT2B,KDM5C,KDM6A,KMT2C,LAMP1,LAMP2,MAFB,MAP3K1,MCM6,MDM2,MRE11,MYORG,NPTX1,NQO1,NRP2,OSGIN1,PCNA,PIK3CA,PILRB,PLXDC2,POLE,PRKACA,PR…
TF	Factor: AhR,; motif: NRCGTGNGN	TF:M00976	0.0425071	1.37154	4014	221	71	20044	ABCC8,AGO4,AKT2,ATG3,ATR,BCL2,BECN1,BMI1,BNIP3,BNIP3L,CABLES1,CASP2,CD47,CD83,CLSTN1,COA5,DOT1L,EP300,EPCAM,GRIA2,GRIN2B,GRM2,HSPB1,IRAK2,JUN,KAT2B,KDM6A,LAMP1,MAFB,MAFF,MAP3K1,MDM2,MRE11,NGFR,PCNA,PLXDC2,PRKAR2A,RAB6B,RAD50,RAD51C,RALB,RELN,RHOA,SIN3A,ST3GAL6,SUV39H1,SUV39H2,SYP,TARBP2,TNFRSF10B,TSPAN18,ACTN1,ADCY9,AMIGO1,ARHGEF10,CCND1,CNR1,COL4A2,EGFL7,GAD1,HAP1,HCN1,HDAC7,ITGA7,ITPR1,NAGLU,PR…
TF	Factor: BTEB2; motif: RGGGNGKGGN; match class: 1	TF:M07277_1	0.0432778	1.36373	4324	221	75	20044	B3GNT5,BAG3,BNIP3,BNIP3L,CABLES1,CASP6,CD83,CLSTN1,DNMT3A,DOT1L,DUSP7,EHMT2,EP300,GRM2,HPRT1,HSPB1,IFNAR2,IGF2R,KAT2A,KDM4D,KMT2C,LIG1,MAFB,MAFF,MAP3K1,MRE11,MYORG,NFE2L2,NGFR,OPTN,PAK1,PCNA,PEX14,PIK3CA,POLE,PRKACA,PRKAR2B,PTMS,RELB,SESN1,SMC1A,SOD2,SOX9,SUV39H2,SYP,TMEM64,TRPM4,TSPAN18,VPS4A,ABL1,ACTN1,ADCY9,AKT1S1,CACNA1C,CCND1,CHRNA7,CPT1B,DRD2,EGFL7,EPHA6,FGF2,GABRG2,HAP1,HDAC7,ITGA7,ITPR1,M…
TF	Factor: BEN; motif: CAGCGRNV	TF:M01240	0.0433184	1.36333	16870	221	207	20044	ABCC8,ADRA2A,AGO4,AKT2,APOE,ASB2,ATF3,ATG3,ATG5,ATR,B3GNT5,BAG3,BAG4,BCL2,BDNF,BECN1,BMI1,BNIP3,BNIP3L,CABLES1,CASP2,CASP6,CD47,CD83,CD8A,CDKN1A,CKS1B,CLIC4,CLSTN1,CNN2,COA5,COTL1,COX5B,CRIP1,CSK,CYP7B1,DAB2,DLG4,DNMT3A,DOCK1,DOT1L,DUSP7,EHMT2,EIF1,EP300,EPCAM,EPG5,FABP5,GRIA1,GRIA2,GRIN2B,GRM2,GRM3,GRN,HDAC1,HPRT1,HSPB1,IFNAR2,IGF2R,IRAK2,JAM2,JUN,KAT2A,KAT2B,KDM4D,KDM5C,KDM6A,KMT2C,LACC1,LAMP1,…
TF	Factor: CTCF; motif: WGCGCCMYCTAGYGGYN	TF:M03895	0.0434455	1.36206	9488	221	136	20044	ABCC8,ADRA2A,AGO4,AKT2,ATR,BAG3,BCL2,BMI1,BNIP3,CASP2,CASP6,CD8A,CDKN1A,CKS1B,CLIC4,CLSTN1,COA5,COTL1,CRIP1,CSK,CYP7B1,DAB2,DLG4,DOT1L,EIF1,EP300,FABP5,GRIA2,GRIN2B,GRN,HDAC1,HPRT1,IFNAR2,IRAK2,JAM2,JUN,KAT2B,KDM4D,KDM6A,LACC1,LAMP1,LIG1,MAFB,MAP3K1,MDM2,MYORG,NFE2L2,NGFR,NQO1,NRP2,NTHL1,OPTN,PAK1,PEX14,POLE,PPFIA4,PRKACA,PRKAR2A,PRKAR2B,PRKCQ,PROS1,PTMS,RAB6B,RAC1,RAD51B,RAD9A,RALB,RELN,RHOA,RIP…
TF	Factor: BEN; motif: CAGCGRNV; match class: 1	TF:M01240_1	0.0458587	1.33858	13586	221	178	20044	ABCC8,ADRA2A,AGO4,AKT2,APOE,ATF3,ATG3,ATG5,ATR,B3GNT5,BAG3,BAG4,BCL2,BDNF,BECN1,BMI1,BNIP3,BNIP3L,CABLES1,CASP2,CD47,CD83,CD8A,CDKN1A,CLIC4,CLSTN1,CNN2,COA5,COX5B,CRIP1,CSK,CYP7B1,DAB2,DLG4,DOCK1,DOT1L,EHMT2,EIF1,EP300,EPCAM,FABP5,GRIA1,GRIA2,GRIN2B,GRM2,GRM3,HDAC1,HSPB1,IFNAR2,IGF2R,IRAK2,JAM2,JUN,KAT2A,KAT2B,KDM4D,KDM5C,KDM6A,KMT2C,LACC1,LAMP1,LIG1,MAFB,MAFF,MAP3K1,MCM6,MDM2,MRE11,MSN,MYORG,NFE…
TF	Factor: MAZ; motif: GGGGAGGG	TF:M00649	0.045878	1.3384	9588	221	137	20044	ADRA2A,AKT2,APOE,ATG3,ATG5,ATR,BAG3,BAG4,BCL2,BDNF,BMI1,BNIP3L,CASP2,CD47,CD83,CD8A,CDKN1A,CLSTN1,CNN2,COTL1,COX5B,CRIP1,CYP7B1,DLG4,DNMT3A,DOT1L,DUSP7,EHMT2,EIF1,EPCAM,GRIA1,GRIA2,GRIN2B,GRM2,GRM3,HDAC1,HPRT1,HSPB1,IRAK2,JAM2,JUN,KAT2A,KAT2B,KDM4D,KDM5C,KDM6A,KMT2C,LAMP2,LIG1,MAFB,MAP3K1,MDM2,MEF2C,MRE11,MYORG,NCAPH,NFE2L2,NGFR,NLGN1,NPTX1,NQO1,NTHL1,PAK1,PEX14,PILRB,PLXDC2,POLE,PPFIA4,PRKACA,PR…
TF	Factor: E2F-3:TBR2; motif: ANGTGYKANGGCGCSTTNNCRNNT	TF:M08207	0.0479313	1.31938	17409	221	211	20044	ABCC8,ADRA2A,AGO4,AKT2,APOE,ATG3,ATG5,ATR,B3GNT5,BAG3,BAG4,BCL2,BDNF,BECN1,BMI1,BNIP3,BNIP3L,CABLES1,CASP2,CASP6,CD47,CD83,CD8A,CDKN1A,CKS1B,CLIC4,CLSTN1,CNN2,COA5,COTL1,COX5B,CRIP1,CSK,CYP7B1,DAB2,DLG4,DNMT3A,DOCK1,DOT1L,DUSP7,EHMT2,EIF1,EP300,EPCAM,EPG5,FABP5,GRIA1,GRIA2,GRIN2B,GRM2,GRM3,GRN,GSN,HDAC1,HPRT1,HSPB1,IFNAR2,IGF2R,IRAK2,JAM2,JUN,KAT2A,KAT2B,KDM4D,KDM5C,KDM6A,KMT2C,LACC1,LAMP1,LAMP2,…
TF	Factor: E2F-2; motif: NWTTTGGCGCCAWWNN; match class: 1	TF:M11530_1	0.0491445	1.30852	13806	221	180	20044	ABCC8,ADRA2A,AGO4,AKT2,APOE,ATG3,ATG5,ATR,B3GNT5,BAG3,BAG4,BCL2,BDNF,BMI1,BNIP3,BNIP3L,CASP2,CASP6,CD47,CD83,CD8A,CKS1B,CLIC4,CLSTN1,CNN2,COTL1,COX5B,CRIP1,CSK,CYP7B1,DAB2,DLG4,DNMT3A,DOCK1,DOT1L,DUSP7,EIF1,EP300,EPCAM,EPG5,FABP5,GRIA2,GRIN2B,GRM2,GRN,HDAC1,HPRT1,HSPB1,IGF2R,IRAK2,JAM2,JUN,KAT2A,KAT2B,KDM4D,KDM5C,KDM6A,KMT2C,LAMP1,LAMP2,LGMN,LIG1,MAFB,MAFF,MAP3K1,MCM6,MRE11,NCAPH,NFE2L2,NGFR,NLGN…
MIRNA	hsa-miR-21-5p	MIRNA:hsa-miR-21-5p	0.00551412	2.25852	636	205	24	14822	AGO4,AKT2,B3GNT5,BCL2,BMI1,CD47,CDKN1A,LAMP2,MAP3K1,MEF2C,PPFIA4,SESN1,SETD1B,SMC1A,TET1,TNFRSF10B,TP53,APAF1,APC,CLU,FGF12,MMP2,NTF3,RASGRP1
MIRNA	hsa-miR-210-3p	MIRNA:hsa-miR-210-3p	0.0364306	1.43853	123	205	9	14822	BDNF,BNIP3,MRE11,MYORG,NPTX1,SIN3A,STMN1,APC,COL4A2
HPA	cerebellum; white matter cells - cytoplasm/membrane[â‰¥Low]	HPA:0091071	0.000442476	3.35411	289	166	17	11019	APOE,BAG3,CD83,FABP5,GSN,HPRT1,LAMP2,MSN,NPTX1,NQO1,PAK1,PPFIA4,PRKAR2B,SLC6A1,CALB2,DRD2,NAGLU
HPA	cerebellum; molecular layer - neuropil[â‰¥Low]	HPA:0090991	0.000560052	3.25177	262	166	16	11019	APOE,BAG3,BDNF,CD83,FABP5,GRIA2,HPRT1,NPTX1,PAK1,SLC44A1,SLC6A1,SOX9,SYP,CNTN1,PPP3CA,SLC12A5
HPA	cerebellum; processes in white matter[â‰¥Low]	HPA:0091041	0.000725098	3.1396	206	166	14	11019	BAG3,CLIC4,GSN,HPRT1,LAMP2,MSN,SLC17A6,CALB2,CNTN1,DRD2,GAD1,HCN1,ITPR1,PPP3CA
HPA	cerebellum; Purkinje cells - cytoplasm/membrane[â‰¥Low]	HPA:0090941	0.000797074	3.0985	442	166	21	11019	APOE,BAG3,CD83,DLG4,GRIA2,HPRT1,HSPB1,LAMP2,NPTX1,PAK1,PPFIA4,SLC44A1,SLC6A1,SYP,CALB2,GAD1,HAP1,ITPR1,NAGLU,PPP3CA,RYR1
HPA	lung; alveolar cells type I[â‰¥Low]	HPA:0301361	0.00122933	2.91033	1091	166	36	11019	BAG3,BMI1,BNIP3,COX5B,EP300,EPCAM,GSN,HDAC1,JUN,KAT2B,KDM6A,LAMP1,MCM6,MDM2,MEF2C,MRE11,MSN,NFE2L2,NTHL1,PAK1,PTMS,RAB7A,RAD50,RAD51B,RAD9A,RIPK1,RPA1,S100A10,SOX9,ABL1,APC,CACNA1C,CRTC2,CXXC1,FGF2,TAF10
HPA	cerebellum; processes in granular layer[â‰¥Low]	HPA:0091021	0.00336073	2.47357	204	166	13	11019	BDNF,CLIC4,COTL1,GSN,LAMP2,MSN,PRKAR2B,SLC17A6,SLC6A1,CALB2,DRD2,HCN1,ITPR1
HPA	placenta; hofbauer cells[â‰¥Medium]	HPA:0381202	0.00463117	2.33431	381	166	18	11019	APOE,CASP6,CDKN1A,DAB2,GSN,KDM6A,MCM6,NFE2L2,NTHL1,RAB7A,RALB,S100A10,SIN3A,SMC1A,STMN1,CNR1,CXXC1,TF
HPA	cerebellum	HPA:0090000	0.00535819	2.27098	7202	166	133	11019	ABCC8,APOE,ATF3,ATG3,ATG5,BAG3,BAG4,BDNF,BECN1,BMI1,BNIP3,BNIP3L,CASP2,CD47,CD83,CKS1B,CLIC4,CLSTN1,COTL1,COX5B,CSK,DAB2,DLG4,DNMT3A,DOCK1,DUSP7,EP300,FABP5,GRIA1,GRIA2,GRIN2B,GRM2,GSN,HPRT1,HSPB1,IGF2R,JUN,KAT2B,KDM4D,KDM6A,LAMP1,LAMP2,LGMN,LIG1,MAFB,MAFF,MAP3K1,MDM2,MEF2C,MRE11,MSN,MYORG,NFE2L2,NLGN1,NPTX1,NQO1,NRP2,NTHL1,OPTN,PAK1,PCNA,PEX14,PIK3CA,PILRB,PLXDC2,PPFIA4,PRDX1,PRKACA,PRKAR2B,PTMS…
HPA	placenta; cytotrophoblasts[â‰¥Medium]	HPA:0381192	0.005592	2.25243	424	166	19	11019	CASP6,CDKN1A,GSN,KDM6A,NFE2L2,NTHL1,PCNA,RAB7A,S100A10,SIN3A,SMC1A,STMN1,TPD52,ABL1,APC,CNR1,CXXC1,HAP1,TAF10
HPA	cerebellum; granular cells - nucleus[â‰¥Medium]	HPA:0090982	0.00706593	2.15083	130	166	10	11019	APOE,DLG4,EP300,GSN,JUN,MEF2C,NPTX1,SOX9,CALB2,FGF2
HPA	placenta; hofbauer cells[â‰¥Low]	HPA:0381201	0.00822316	2.08496	436	166	19	11019	APOE,CASP6,CDKN1A,DAB2,GSN,KDM6A,MCM6,NFE2L2,NTHL1,RAB7A,RALB,S100A10,SIN3A,SMC1A,STMN1,ABL1,CNR1,CXXC1,TF
HPA	cerebellum; GLUC cells - cytoplasm/membrane[â‰¥Low]	HPA:0090921	0.0103575	1.98475	195	166	12	11019	BDNF,DLG4,HPRT1,NPTX1,PAK1,PRKAR2B,SLC6A1,SYP,CALB2,HAP1,HCN1,NAGLU
HPA	placenta; cytotrophoblasts[High]	HPA:0381193	0.0104847	1.97944	295	166	15	11019	CASP6,CDKN1A,GSN,KDM6A,NFE2L2,NTHL1,RAB7A,S100A10,SIN3A,SMC1A,STMN1,APC,CNR1,CXXC1,TAF10
HPA	cerebellum; granular cells - cytoplasm/membrane[â‰¥Low]	HPA:0090971	0.0113328	1.94566	297	166	15	11019	APOE,BDNF,CD83,COTL1,FABP5,GSN,LAMP2,MSN,PAK1,PPFIA4,CALB2,CNTN1,GAD1,NAGLU,PPP3CA
HPA	lung; alveolar cells type I[â‰¥Medium]	HPA:0301362	0.0147471	1.83129	887	166	29	11019	BMI1,COX5B,EP300,HDAC1,JUN,KAT2B,LAMP1,MCM6,MDM2,MEF2C,MRE11,NFE2L2,NTHL1,PTMS,RAB7A,RAD50,RAD51B,RAD9A,RIPK1,RPA1,S100A10,SOX9,ABL1,APC,CACNA1C,CRTC2,CXXC1,FGF2,TAF10
HPA	cerebellum; processes in granular layer[â‰¥Medium]	HPA:0091022	0.0190888	1.71922	176	166	11	11019	COTL1,GSN,LAMP2,MSN,PRKAR2B,SLC17A6,SLC6A1,CALB2,DRD2,HCN1,ITPR1
HPA	cerebellum; granular cells - nucleus[â‰¥Low]	HPA:0090981	0.0190955	1.71907	146	166	10	11019	APOE,DLG4,EP300,GSN,JUN,MEF2C,NPTX1,SOX9,CALB2,FGF2
HPA	placenta; hofbauer cells[High]	HPA:0381203	0.0247702	1.60607	282	166	14	11019	APOE,CASP6,CDKN1A,DAB2,GSN,KDM6A,MCM6,NFE2L2,NTHL1,RAB7A,S100A10,SIN3A,SMC1A,CXXC1
HPA	placenta; cytotrophoblasts[â‰¥Low]	HPA:0381191	0.0267879	1.57206	476	166	19	11019	CASP6,CDKN1A,GSN,KDM6A,NFE2L2,NTHL1,PCNA,RAB7A,S100A10,SIN3A,SMC1A,STMN1,TPD52,ABL1,APC,CNR1,CXXC1,HAP1,TAF10
HPA	appendix; non-germinal center cells[â‰¥Medium]	HPA:0030442	0.0463747	1.33372	263	166	13	11019	BCL2,BNIP3L,CD83,COTL1,COX5B,GSN,MCM6,MEF2C,RAD50,S100A10,SOX9,STMN1,TPD52
HPA	skin 1; cells in spinous layer[â‰¥Low]	HPA:0461411	0.0470011	1.32789	760	166	25	11019	APOE,BAG3,BNIP3,BNIP3L,CDKN1A,COX5B,FABP5,HPRT1,HSPB1,JUN,KAT2B,LAMP1,LAMP2,MCM6,MSN,NCAPH,NFE2L2,NTHL1,PCNA,RAB7A,RAD50,RPA1,S100A10,SMC1A,TPD52
CORUM	p300-MDM2-p53 protein complex	CORUM:98	0.00264317	2.57787	3	87	3	3383	EP300,MDM2,TP53
CORUM	pRb2/p130-multimolecular complex (RB2, E2F5, HDAC1, SUV39H1, P300)	CORUM:1471	0.0254561	1.59421	5	87	3	3383	EP300,HDAC1,SUV39H1
CORUM	RBL2 complex (E2F4, E2F5, HDAC1, SUV39H1, P300, RBL2)	CORUM:5118	0.0499652	1.30133	6	87	3	3383	EP300,HDAC1,SUV39H1
HP	Breast carcinoma	HP:0003002	7.78627e-05	4.10867	71	116	12	5080	ATR,EPCAM,MDM2,MRE11,NTHL1,PIK3CA,POLE,RAD50,RAD51C,TP53,APC,PRKN
HP	Neoplasm of the pancreas	HP:0002894	9.61444e-05	4.01708	87	116	13	5080	CDKN1A,EPCAM,MDM2,MRE11,NTHL1,PIK3CA,POLE,RAD50,RAD51C,TP53,APC,CCND1,MUTYH
HP	Gonadal neoplasm	HP:0010785	9.92174e-05	4.00341	103	116	14	5080	EP300,EPCAM,MAP3K1,MDM2,MRE11,PIK3CA,POLE,RAD50,RAD51C,SOX9,TP53,CCND1,MUTYH,PRKN
HP	Ovarian neoplasm	HP:0100615	0.000125991	3.89966	74	116	12	5080	EPCAM,MAP3K1,MDM2,MRE11,PIK3CA,POLE,RAD50,RAD51C,SOX9,TP53,MUTYH,PRKN
HP	Neoplasm of the breast	HP:0100013	0.000319154	3.496	96	116	13	5080	ATR,EPCAM,MDM2,MRE11,NTHL1,PIK3CA,POLE,RAD50,RAD51C,TP53,APC,MUTYH,PRKN
HP	Genital neoplasm	HP:0010787	0.000452517	3.34437	153	116	16	5080	EP300,EPCAM,MAP3K1,MDM2,MRE11,NTHL1,PIK3CA,POLE,RAD50,RAD51C,SOX9,TP53,APC,CCND1,MUTYH,PRKN
HP	Large intestinal polyposis	HP:0030255	0.000643828	3.19123	32	116	8	5080	EPCAM,MDM2,NTHL1,PIK3CA,POLE,TP53,APC,MUTYH
HP	Glioblastoma multiforme	HP:0012174	0.00112955	2.94709	24	116	7	5080	EPCAM,MDM2,PIK3CA,POLE,TP53,APC,MUTYH
HP	Prostate cancer	HP:0012125	0.00944163	2.02495	32	116	7	5080	MDM2,MRE11,NTHL1,RAD50,RAD51C,TP53,APC
HP	Prostate neoplasm	HP:0100787	0.00944163	2.02495	32	116	7	5080	MDM2,MRE11,NTHL1,RAD50,RAD51C,TP53,APC
HP	Neoplasm of the rectum	HP:0100743	0.0102979	1.98725	45	116	8	5080	EPCAM,MDM2,NTHL1,PIK3CA,POLE,TP53,APC,MUTYH
HP	Abnormal male internal genitalia morphology	HP:0000022	0.0103214	1.98626	92	116	11	5080	EP300,MDM2,MRE11,NTHL1,PIK3CA,RAD50,RAD51C,SOX9,TP53,APC,CCND1
HP	Male reproductive system neoplasm	HP:0033019	0.0151463	1.81969	62	116	9	5080	MAP3K1,MDM2,MRE11,NTHL1,RAD50,RAD51C,SOX9,TP53,APC
HP	Glioma	HP:0009733	0.0170263	1.76888	48	116	8	5080	CDKN1A,EPCAM,MDM2,PIK3CA,POLE,TP53,APC,MUTYH
HP	Intestinal polyposis	HP:0200008	0.0170263	1.76888	48	116	8	5080	EPCAM,MDM2,NTHL1,PIK3CA,POLE,TP53,APC,MUTYH
HP	Disturbed perception with a stimulus	HP:5200204	0.0178229	1.74902	35	116	7	5080	APOE,EPCAM,GRN,PIK3CA,POLE,MUTYH,SORL1
HP	Disturbed sensory perception	HP:0010524	0.0178229	1.74902	35	116	7	5080	APOE,EPCAM,GRN,PIK3CA,POLE,MUTYH,SORL1
HP	Colorectal polyposis	HP:0200063	0.0199675	1.69968	24	116	6	5080	MDM2,PIK3CA,POLE,TP53,APC,MUTYH
HP	Abnormal interpretation of external stimuli	HP:5200202	0.0217108	1.66333	36	116	7	5080	APOE,EPCAM,GRN,PIK3CA,POLE,MUTYH,SORL1
HP	Cognitive impairment	HP:0100543	0.0250715	1.60082	1024	116	43	5080	APOE,ATR,BDNF,CASP2,CDKN1A,CYP7B1,EP300,EPCAM,GRIA1,GRN,GSN,JAM2,LAMP2,MYORG,NLGN1,NPTX1,OPTN,PEX14,PIK3CA,POLE,PRDX1,SIN3A,SLC44A1,SLC6A1,SMC1A,SPP1,TP53,CACNA1C,CHRNA7,FGF12,GABRG2,HCN1,ITPR1,MUTYH,NAGLU,NKX6-2,NR4A2,PPP3CA,PRKCG,PRKN,RYR1,SLC12A5,SORL1
HP	Uterine neoplasm	HP:0010784	0.0328029	1.48409	68	116	9	5080	EP300,EPCAM,NTHL1,PIK3CA,POLE,TP53,APC,CCND1,MUTYH
HP	Intestinal polyp	HP:0005266	0.0363598	1.43938	53	116	8	5080	EPCAM,MDM2,NTHL1,PIK3CA,POLE,TP53,APC,MUTYH
HP	Abnormal prostate morphology	HP:0008775	0.0449591	1.34718	40	116	7	5080	MDM2,MRE11,NTHL1,RAD50,RAD51C,TP53,APC
HP	Colon cancer	HP:0003003	0.0449591	1.34718	40	116	7	5080	EPCAM,MDM2,NTHL1,PIK3CA,TP53,APC,MUTYH
HP	Adenomatous colonic polyposis	HP:0005227	0.0471655	1.32638	17	116	5	5080	EPCAM,NTHL1,POLE,APC,MUTYH
HP	Subacute progressive viral hepatitis	HP:0006572	0.0496352	1.30421	9	116	4	5080	IGF2R,PIK3CA,TP53,APC

## Sheet: S3 - PC-OxPL-VecTab normal.
Gene name	Wt	SOD1 (G93A)	SOD1 (G93A) + AAV5.2-OxPC-VecTab
KDM6A	1	2.1107	1.92373
ASB2	1	2.10152	1.76243
SERPINF1	1	1.60211	1.07194
RYR1	1	1.55	1.16
DOT1L	1	1.49241	1.30935
NCAPH	1	1.43393	1.11054
SORL1	1	1.43	1.29
MSN	1	1.38237	1.25885
ADCYAP1	1	1.32	1.1
IGF2R	1	1.31191	1.18385
MRE11	1	1.30798	1.09812
SLC2A1	1	1.30596	1.07604
TPD52	1	1.29655	1.17541
EMP1	1	1.28844	1.05654
SUV39H1	1	1.28425	1.11001
PILRA	1	1.26345	1.03711
APOE	1	1.26	0.97
BECN1	1	1.2428	1.09671
AKT2	1	1.24279	1.13454
MUTYH	1	1.24	1.05
MAPK12	1	1.23569	0.999497
GRM2	1	1.23	0.98
AMIGO1	1	1.21	1.02
CHEK1	1	1.18983	1.01182
ULK1	1	1.17525	1.0185
CASP9	1	1.17166	0.95128
PRKDC	1	1.15539	0.991331
NRM	1	1.14973	0.97817
TAZ	1	1.14	0.94
CHST8	1	1.13463	1.02218
LMNB1	1	1.12403	1.01588
TADA2B	1	1.11324	1.0033
SETD1B	1	1.11079	0.898305
PPFIA4	1	1.10028	0.911251
NAGLU	1	1.1	1
ARHGEF10	1	0.9	1.08
PNKD	1	0.9	1.03
TNFRSF10B	1	0.9	1.40662
PRKCQ	1	0.9	1.14198
TNFRSF1A	1	0.9	0.725813
PPP3CA	1	0.88	0.97
NTF3	1	0.88	1.18
CHRNA7	1	0.88	1.06
CAMK4	1	0.88	0.981443
GBA	1	0.88	1.00546
PSEN2	1	0.88	0.989831
EZH1	1	0.87	0.961718
TMEM206	1	0.87	0.963195
TP53BP2	1	0.87	1.00933
SOX9	1	0.86	1.02
CREM	1	0.86	1.04604
GABRG2	1	0.84	1.02
APAF1	1	0.84	0.93
BID	1	0.84	0.932093
PRKAA2	1	0.83	0.98
BDNF	1	0.82	1.14904
CTSS	1	0.82	1.03248
RASGRP1	1	0.8	1.33
DLG1	1	0.8	0.958912
PTGER3	1	0.8	0.921531
PTPRR	1	0.79	0.94
TIMP1	1	0.79	1.00509
ITGAV	1	0.79	0.963434
PTX3	1	0.79	0.953961
BMI1	1	0.78	0.875569
RIPK2	1	0.76	0.886128
TF	1	0.75	1.32
CRTC2	1	0.74	0.85
FGF2	1	0.74	0.84
HSPB1	1	0.72	0.836926
IRAK4	1	0.7	0.873279
BCL2	1	0.69	0.783471
GAD1	1	0.68	0.77
PLXDC2	1	0.67	0.752645
FAM104A	1	0.66	0.958685
SOX9	1	0.64	0.843164
NQO1	1	0.64	0.869565
LACC1	1	0.63	0.748867
NLGN1	1	0.62	0.723134
SPP1	1	0.61	0.482215
TRIM47	1	0.59	0.699338
CDKN1A	1	0.59	3.06615
CACNB4	1	0.57	0.73
CASP6	1	0.57	0.728714
IKBKB	1	0.51	0.780465

## Sheet: S4 - Ferroptosis Enrich. Score
Term	Overlap	P-value	Adj. P-value	Odds Ratio	Hit gene	Background
Ferroptosis regulator	12/564	4.21e-06	0.02105	5906	TIMP1;SETD1B;HSPB1;ULK1;CDKN1A;TF;SUV39H1;PRKAA2;BID;BECN1;SLC2A1;NQO1	19901
Ferroptosis driver	6/264	0.0008815	0.001102	6148	TIMP1;ULK1;TF;PRKAA2;BID;BECN1	19901
Ferroptosis suppressor	6/238	0.0005129	0.001036	6827	HSPB1;CDKN1A;TF;SUV39H1;PRKAA2;NQO1	19901
Ferroptosis marker	2/9	0.0006217	0.001036	63.45	TF;HSPB1	19901
N = 74

## Sheet: S5 - LC-MS PC-OxPL species
	PC-OxPL	PC-OxPL category	Wt concentration PC-OxPL (ng/mL)												SOD1 (G93A) concentration PC-OxPL (ng/mL)												SOD1 (G93A) treated concentration PC-OxPL (ng/mL)
	Succinoyl-PPC	Acid-OxPC	247.31	106	144.62	104.32	90.92	103.01	159.92	161.2	100.71	138.13	140.38	75.74	291,53*	101.58	142.04	90.53	92.05	105.81	96.16	87.17	164.38	66.03	88.6	133.37	85.93	102.27	110.98	92.17	86.95	93.33	89.63	111.64	95.24	101.08
	PGPC	Acid-OxPC	1.54	0.76	0.63	0.6	0.54	0.78	1.41	1	1.02	0.73	0.72	0.52	1.04	1.38	0.81	0.45	1.74	1.61	2.72	1.02	2.13	2.66	1.26	2.97	0.58	0.56	0.48	1.48	0.79	0.55	1.67	0.88	2.25	1.12
	HDdiA-PPC	Acid-OxPC	9.8	5.88	5.28	3.24	2.35	3.5	7.75	6.78	3.9	10.49	4.53	1.88	4.87	0.44	1.17	1.83	1.89	1.39	9,98*	0.75	1.55	1.87	1.26	0.9	1.99	0.86	1.03	1.02	1.94	1.17	0.63	0.91	1.64	1.38
	PAzPC	Acid-OxPC	7.27	18,81*	3.25	2.77	3.31	3.92	6.48	3.68	5.78	5.72	9.6	3.1	6.38	16.85	8.18	8.78	12.61	15.02	7.19	11.45	11.66	10.19	5.91	10.83	5.58	9.83	6.35	6.78	4.06	4.3	6.36	18.93	8.35	3.8
	4-oxo-butyryl-PC	Aldo-OxPC	7.37	4.19	5.91	7.28	4.14	7.24	10.99	3.77	4.03	7.99	5.55	5.22	7.84	14.06	9.38	14.47	13.12	16.64	22.35	18.9	16.64	17.43	6.58	10.12	5.65	6.68	5.97	15.47	12.74	11.54	12.33	9.01	13.95	10.74
	POVPC	Aldo-OxPC	72,16*	14.99	13.41	17.32	9.96	15.75	113,16*	11.53	13.91	20.12	15.44	16.1	26.34	35.08	19.74	31.25	31.04	44.01	48.8	31.02	34.59	35.32	24.15	35.5	12.42	15.22	16.12	30.49	23.07	23.36	27.64	25.23	38.17	25.03
	HODA-PPC	Aldo-OxPC	3.02	0.45	0.49	1.04	0.52	0.56	3.46	1.17	1.59	1.19	0.96	0.75	1.5	3.19	1.11	2.75	1.95	3.67	3.37	1.06	9,47*	2.47	2.77	3.17	2.67	0.45	1.48	1.31	2.43	0.2	1.06	1.17	1.56	1.56
	PLPC	Aldo-OxPC	13.67	8.17	7.76	5.67	4.45	5.8	10.61	7.38	7.26	12.15	8.4	5.12	12.68	20.66	12.12	14.56	20.9	26.54	18.13	12.52	22.71	21.96	13.23	31.74	5.34	6.37	5.44	14.32	9.84	12.66	17.54	14.37	21.47	10.77
	PONPC	Aldo-OxPC	39.94	33.32	27.91	20.76	16.66	25.79	33.48	42.58	39.49	41.44	54.55	36.49	32.34	191.56	63.77	79.23	79.08	104.44	57.99	65.34	136.83	143.59	88.19	122.53	60.98	53.7	51.04	106.19	68.63	81.75	75.93	70.49	182.87	71.96
	KOOA-SPC	Aldo-OxPC	16.03	9.93	8.89	9.55	4.58	6.57	9.75	9.21	12.35	8.01	10.03	7.35	9.54	21.12	14.54	9.39	17.97	20.26	17.33	8.66	16.16	7.71	12.07	14.87	12.77	10.55	11.23	15.28	8.4	6.85	12.01	14.35	29,74*	6.38
	SOVPC	Aldo-OxPC	226,71*	20.4	17.6	29.17	19.07	21.16	376,91*	19.85	24.3	39.6	28.48	21.16	27.35	50.89	35.08	41.94	41.73	50.73	13.17	35.14	59.41	48.75	34.88	47.13	22.05	20.11	27.25	47.66	35.76	38.01	45.77	44.76	50.56	33.07
	SONPC	Aldo-OxPC	19.93	12.47	11.94	5.06	5	4.74	24.07	16.05	16.2	18.83	14.42	6.37	10.42	20.03	12.83	17.42	19.67	19.35	37.3	9.08	21.05	28.64	20.63	10.92	13.21	4.64	8.05	10.51	7.99	11.51	9.54	12.66	25.33	6.87
	PLPC-OH	non-fragmented	49.5	143.46	74.89	52.84	31.13	101.98	44.02	165.07	68.96	64.99	52.02	53.7	118.75	58.49	27.58	22.98	37.39	58.77	153.04	21.46	61.92	96.82	69.61	52.29	74.62	60.33	25.68	14.15	30.69	115.04	81.47	64.98	138.09	17.05
	SLPC-epoxy,keto	non-fragmented	69.98	65.54	100.83	75.45	40.26	20.98	96.27	103.4	44.25	139.67	98.7	45.81	30.31	26.75	48.29	51.73	53.35	30.43	104.82	31.12	83.51	43.3	55.17	51	53.08	41.14	62.43	34.25	38.59	55.51	69.05	63.67	55.02	37.54
	PLPC-OOH,OH	non-fragmented	3176.62	4884.1	8821.37	5917.7	2552.93	1418.12	4159.63	10428.2	3185.37	12408.5	7446.97	2782.23	895.45	2116.87	3544.3	3555.71	2230.9	2198.25	2604.31	2257.6	6011.74	2101.26	3012.53	2634.08	2644.67	2183.56	3420.01	2210.79	2570.93	2511.08	4215.53	2336.44	2527.15	1951.34
	SAPC-OH	non-fragmented	136.41	119.8	121.94	84.15	104.84	83.46	151.23	84.11	101.63	99.48	68.59	80.09	89.7	62.75	58.38	78.47	73.8	66.88	97.31	54.57	83.48	83.72	71.26	77.24	87.21	75.52	85.58	55.78	77.14	76.19	62.98	73.55	71.93	50.29
	PAPC-OH	non-fragmented	169.95	128.23	150.32	99.89	39.63	35.38	115.12	296.15	69.7	141.4	160.82	64.02	89.61	50.2	66.21	62.32	61.48	60.21	110.26	39.34	138.97	49.38	60.71	96.25	78.49	46.71	78.98	39.04	73.36	304.34	318.08	253.3	342.3	167.71
	isoPGF2alpha-PPC	non-fragmented	3074.6	2479.96	2488.67	2106.13	1810.54	961.96	3066.36	2401.9	2141.13	2961.76	1663.23	951.68	2082.29	1169.9	1169.53	1675.73	1633.31	1091.31	4104,32*	1294.49	2011.77	1274.16	1367.68	1590.5	1275.2	909.84	1185.29	1175.59	1532.84	1135.04	1088.73	1530.55	957.64	1042.83
	isoPGF2alpha-SPC	non-fragmented	196.31	301.23	444.92	244.98	132.53	68.9	196.05	384.18	151.16	524.67	317.65	99.83	137.46	118.3	135.31	133.19	158.85	84.54	205.41	105.18	310.48	93.62	126.8	128.75	123.51	99.84	120.47	80.29	113.35	204.72	201.8	103.23	240.61	148.34
			Notes
			1.	Data is combined from mice sacrificied at days 70 (grey shading) and 90 (no shading).
			2.	Values denoted with an asterisk were considered outliers, as described in the manuscript.
		non-fragmented
